# Supplementary material for: Investigating Non-sterilizing Cure in TB Patients at the End of Successful Anti-TB Therapy
Source: Front Cell Infect Microbiol. 2020 Aug 25;10:443. doi: 10.3389/fcimb.2020.00443 (PMC7477326; doi:10.3389/fcimb.2020.00443)
Supplement: Supplementary file 2 [file Data_Sheet_2.xlsx]

## Sheet: all
Splitds	UniprotIDs	Fasta headers	Gene Name	Unique peptides	Number of proteins	Reporter intensity corrected 0	Reporter intensity corrected 1	Reporter intensity corrected 2	Reporter intensity corrected 3	Reporter intensity corrected 4	Reporter intensity corrected 5	Reporter intensity corrected 6	Reporter intensity corrected 7	Reporter intensity corrected 8	Reporter intensity corrected 9	pValue	qValue	EffectSize	Comparison	significant
A0A075B6I0	A0A075B6I0	>SP|A0A075B6I0|LV861_HUMAN Immunoglobulin lambda variable 8-61 OS=Homo sapiens OX=9606 GN=IGLV8-61 PE=3 SV=7	IGLV8-61	2	1	16961	18875	32228	44004	55731	23893	36160	38134	24075	24267	0.00978256	0.0520202	1.31081	TB-EOT	Non significant
A0A075B6K4	A0A075B6K4;A0A075B6K0;P01715	>SP|A0A075B6K4|LV310_HUMAN Immunoglobulin lambda variable 3-10 OS=Homo sapiens OX=9606 GN=IGLV3-10 PE=3 SV=2	IGLV3-10	3;1;1	3	675860	194810	443820	2630900	1249900	327530	1003300	589320	1361500	115380	7.37781e-05	0.00456573	3.06163	TB-EOT	Upregulated
A0A075B6S5	A0A075B6S5;A0A0C4DH67;A0A0C4DH69	>SP|A0A075B6S5|KV127_HUMAN Immunoglobulin kappa variable 1-27 OS=Homo sapiens OX=9606 GN=IGKV1-27 PE=3 SV=1;>SP|A0A0C4DH67|KV108_HUMAN Immunoglobulin kappa variable 1-8 OS=Homo sapiens OX=9606 GN=IGKV1-8 PE=3 SV=1;>SP|A0A0C4DH69|KV109_HUMAN Immunoglobulin kap	IGKV1-27;IGKV1-8;IGKV1-9	2;1;1	3	1137.1	578.58	5229.1	11643	4324.2	5901.9	6038.3	6012.6	5158.8	1892.9	0.0046761	0.0318939	1.81901	TB-EOT	Upregulated
A0A0A0MRZ8	A0A0A0MRZ8;P04433	>SP|A0A0A0MRZ8|KVD11_HUMAN Immunoglobulin kappa variable 3D-11 OS=Homo sapiens OX=9606 GN=IGKV3D-11 PE=3 SV=6;>SP|P04433|KV311_HUMAN Immunoglobulin kappa variable 3-11 OS=Homo sapiens OX=9606 GN=IGKV3-11 PE=1 SV=1	IGKV3D-11	3;3	2	10253	498.84	7713.2	75098	27458	10850	6741.3	25126	28886	2773.9	3.66693e-05	0.00374789	3.58084	TB-EOT	Upregulated
A0A0A0MS15	A0A0A0MS15	>SP|A0A0A0MS15|HV349_HUMAN Immunoglobulin heavy variable 3-49 OS=Homo sapiens OX=9606 GN=IGHV3-49 PE=3 SV=1	IGHV3-49	3	1	68191	17610	64197	425170	231850	92739	100120	257550	161860	51015	8.83229e-06	0.00335848	2.71523	TB-EOT	Upregulated
A0A0B4J1U7	A0A0B4J1U7	>SP|A0A0B4J1U7|HV601_HUMAN Immunoglobulin heavy variable 6-1 OS=Homo sapiens OX=9606 GN=IGHV6-1 PE=3 SV=1	IGHV6-1	3	1	1037500	407130	753200	903630	1012200	668170	692880	696870	2185200	130610	0.00449791	0.0310969	2.16358	TB-EOT	Upregulated
A0A0B4J1V0	A0A0B4J1V0	>SP|A0A0B4J1V0|HV315_HUMAN Immunoglobulin heavy variable 3-15 OS=Homo sapiens OX=9606 GN=IGHV3-15 PE=3 SV=1	IGHV3-15	2	1	339670	171370	508810	1018100	1711900	301290	349620	719410	953140	197140	9.44914e-05	0.00456573	2.28615	TB-EOT	Upregulated
A0A0B4J1V2	A0A0B4J1V2	>SP|A0A0B4J1V2|HV226_HUMAN Immunoglobulin heavy variable 2-26 OS=Homo sapiens OX=9606 GN=IGHV2-26 PE=3 SV=1	IGHV2-26	2	1	40216	93111	209270	383000	261890	340470	102480	233810	147630	168220	0.174104	0.323527	0.626415	TB-EOT	Non significant
A0A0C4DH34	A0A0C4DH34	>SP|A0A0C4DH34|HV428_HUMAN Immunoglobulin heavy variable 4-28 OS=Homo sapiens OX=9606 GN=IGHV4-28 PE=3 SV=1	IGHV4-28	2	1	1102500	344590	1111000	2377300	2461400	987590	1482000	1371900	2655900	409820	3.34315e-05	0.00374789	2.38363	TB-EOT	Upregulated
A0A0C4DH38	A0A0C4DH38	>SP|A0A0C4DH38|HV551_HUMAN Immunoglobulin heavy variable 5-51 OS=Homo sapiens OX=9606 GN=IGHV5-51 PE=3 SV=1	IGHV5-51	2	1	243530	167040	414530	964670	1204600	333010	302200	674910	793190	195010	0.000149999	0.00489173	2.06506	TB-EOT	Upregulated
A0A0C4DH43	A0A0C4DH43	>SP|A0A0C4DH43|HV70D_HUMAN Immunoglobulin heavy variable 2-70D OS=Homo sapiens OX=9606 GN=IGHV2-70D PE=3 SV=1		3	1	88605	28869	279870	2237300	524140	175800	440440	312910	401490	105230	0.000460353	0.00843612	2.79391	TB-EOT	Upregulated
A0A0J9YX35	A0A0J9YX35	>SP|A0A0J9YX35|HV64D_HUMAN Immunoglobulin heavy variable 3-64D OS=Homo sapiens OX=9606 GN=IGHV3-64D PE=3 SV=1		2	1	64446	31576	265040	505210	371460	114150	99702	146630	252910	67197	0.00109609	0.0131468	1.93101	TB-EOT	Upregulated
A0AVT1	A0AVT1;A0AVT1-2;A0AVT1-4;A0AVT1-3	>SP|A0AVT1|UBA6_HUMAN Ubiquitin-like modifier-activating enzyme 6 OS=Homo sapiens OX=9606 GN=UBA6 PE=1 SV=1;>SP|A0AVT1-2|UBA6_HUMAN Isoform 2 of Ubiquitin-like modifier-activating enzyme 6 OS=Homo sapiens OX=9606 GN=UBA6	UBA6	11;6;3;3	4	32951	61004	373080	200450	239320	308050	123690	169740	151970	582870	0.814574	0.880573	-0.0917837	TB-EOT	Non significant
A0MZ66-5	A0MZ66-5;A0MZ66-6;A0MZ66;A0MZ66-8;A0MZ66-4;A0MZ66-3;A0MZ66-2;A0MZ66-7	>SP|A0MZ66-5|SHOT1_HUMAN Isoform 5 of Shootin-1 OS=Homo sapiens OX=9606 GN=SHTN1;>SP|A0MZ66-6|SHOT1_HUMAN Isoform 6 of Shootin-1 OS=Homo sapiens OX=9606 GN=SHTN1;>SP|A0MZ66|SHOT1_HUMAN Shootin-1 OS=Homo sapiens OX=9606 GN=SHTN1 PE=1 SV=4;>SP|A0MZ66-8|SHOT1_HUM	KIAA1598	11;11;11;10;10;10;8;4	8	230170	366690	1321000	494720	311150	1342200	214980	312800	360830	1647800	0.00894786	0.0489582	-0.864819	TB-EOT	Non significant
A2NJV5	A2NJV5;A0A075B6S2;A0A0A0MRZ7;A0A075B6S6;A0A075B6P5;A0A087WW87;P06310;P01615;P01614	>SP|A2NJV5|KV229_HUMAN Immunoglobulin kappa variable 2-29 OS=Homo sapiens OX=9606 GN=IGKV2-29 PE=3 SV=2;>SP|A0A075B6S2|KVD29_HUMAN Immunoglobulin kappa variable 2D-29 OS=Homo sapiens OX=9606 GN=IGKV2D-29 PE=3 SV=1;>SP|A0A0A0MRZ7|KVD26_HUMAN Immunoglobulin kap	IGKV A18;IGKV2D-29;IGKV2D-26;IGKV2D-30;IGKV2D-28;IGKV2-40	2;2;1;1;1;1;1;1;1	9	807170	351980	791270	1703600	894740	628750	983160	1005400	1586200	221450	0.000736132	0.010977	2.18748	TB-EOT	Upregulated
A4D1P6-2	A4D1P6-2;A4D1P6;A4D1P6-3	>SP|A4D1P6-2|WDR91_HUMAN Isoform 2 of WD repeat-containing protein 91 OS=Homo sapiens OX=9606 GN=WDR91;>SP|A4D1P6|WDR91_HUMAN WD repeat-containing protein 91 OS=Homo sapiens OX=9606 GN=WDR91 PE=1 SV=2	WDR91	3;3;1	3	7978	9177.8	31892	12838	15434	21021	5201.5	11252	8682.3	51961	0.213819	0.367895	-0.444996	TB-EOT	Non significant
B9A064	B9A064;P0CG04	>SP|B9A064|IGLL5_HUMAN Immunoglobulin lambda-like polypeptide 5 OS=Homo sapiens OX=9606 GN=IGLL5 PE=2 SV=2;>SP|P0CG04|IGLC1_HUMAN Immunoglobulin lambda constant 1 OS=Homo sapiens OX=9606 GN=IGLC1 PE=1 SV=1	IGLL5;IGLC1	3;2	2	10602000	4369800	13172000	43868000	18526000	7873100	11771000	23884000	29036000	4068000	9.97929e-05	0.00456573	2.48992	TB-EOT	Upregulated
O00115-2	O00115-2;O00115	>SP|O00115-2|DNS2A_HUMAN Isoform 2 of Deoxyribonuclease-2-alpha OS=Homo sapiens OX=9606 GN=DNASE2;>SP|O00115|DNS2A_HUMAN Deoxyribonuclease-2-alpha OS=Homo sapiens OX=9606 GN=DNASE2 PE=1 SV=2	DNASE2	3;3	2	45409	99136	113640	94612	132080	167760	51724	64607	89773	336450	0.506801	0.641302	-0.235576	TB-EOT	Non significant
O00151	O00151	>SP|O00151|PDLI1_HUMAN PDZ and LIM domain protein 1 OS=Homo sapiens OX=9606 GN=PDLIM1 PE=1 SV=4	PDLIM1	6	1	460120	225460	938430	1365100	1036500	935650	442330	541370	686660	760600	0.00586241	0.0376233	1.00294	TB-EOT	Upregulated
O00159-2	O00159-2;O00159-3;O00159	>SP|O00159-2|MYO1C_HUMAN Isoform 2 of Unconventional myosin-Ic OS=Homo sapiens OX=9606 GN=MYO1C;>SP|O00159-3|MYO1C_HUMAN Isoform 3 of Unconventional myosin-Ic OS=Homo sapiens OX=9606 GN=MYO1C;>SP|O00159|MYO1C_HUMAN Unconventional myosin-Ic OS=Homo sapiens OX=	MYO1C	7;7;7	3	21087	79059	130910	163070	91908	315530	27476	63102	81857	220690	0.136527	0.274678	-0.601438	TB-EOT	Non significant
O00160	O00160	>SP|O00160|MYO1F_HUMAN Unconventional myosin-If OS=Homo sapiens OX=9606 GN=MYO1F PE=1 SV=3	MYO1F	3	1	7521.6	40493	91107	24242	44622	140030	9747.2	21390	15999	225740	0.000345272	0.00729387	-1.7263	TB-EOT	Downregulated
O00161-2	O00161-2;O00161	>SP|O00161-2|SNP23_HUMAN Isoform SNAP-23b of Synaptosomal-associated protein 23 OS=Homo sapiens OX=9606 GN=SNAP23;>SP|O00161|SNP23_HUMAN Synaptosomal-associated protein 23 OS=Homo sapiens OX=9606 GN=SNAP23 PE=1 SV=1	SNAP23	2;2	2	38110	35227	101860	55265	77528	214120	54581	32510	126350	150280	0.97695	0.986026	0.010213	TB-EOT	Non significant
O00170	O00170	>SP|O00170|AIP_HUMAN AH receptor-interacting protein OS=Homo sapiens OX=9606 GN=AIP PE=1 SV=2	AIP	2	1	3496.5	2607.8	16893	11938	9879.9	16975	6475.5	6737.8	10215	20525	0.321375	0.486354	0.295518	TB-EOT	Non significant
O00182-3	O00182-3;O00182-2;O00182-6;O00182;O00182-5;O00182-4;Q3B8N2-2;Q6DKI2;Q3B8N2	>SP|O00182-3|LEG9_HUMAN Isoform 3 of Galectin-9 OS=Homo sapiens OX=9606 GN=LGALS9;>SP|O00182-2|LEG9_HUMAN Isoform 2 of Galectin-9 OS=Homo sapiens OX=9606 GN=LGALS9;>SP|O00182-6|LEG9_HUMAN Isoform 6 of Galectin-9 OS=Homo sapiens OX=9606 GN=LGALS9;>SP|O00182|LEG	LGALS9	4;4;4;4;2;2;1;1;1	9	47778	142920	317260	65048	103960	342960	43183	29973	52721	430110	0.000792205	0.0111569	-1.57577	TB-EOT	Downregulated
O00193	O00193	>SP|O00193|SMAP_HUMAN Small acidic protein OS=Homo sapiens OX=9606 GN=SMAP PE=1 SV=1	SMAP	4	1	115720	129660	300760	123270	115110	365990	146490	91649	225070	302930	0.761795	0.84146	-0.116047	TB-EOT	Non significant
O00194	O00194;P51159-2;P51159	>SP|O00194|RB27B_HUMAN Ras-related protein Rab-27B OS=Homo sapiens OX=9606 GN=RAB27B PE=1 SV=4;>SP|P51159-2|RB27A_HUMAN Isoform Short of Ras-related protein Rab-27A OS=Homo sapiens OX=9606 GN=RAB27A;>SP|P51159|RB27A_HUMAN Ras-related protein Rab-27A OS=Homo s	RAB27B;RAB27A	2;2;2	3	7960.9	33042	49989	40366	39619	70295	29353	38099	109790	63069	0.578436	0.702156	0.246659	TB-EOT	Non significant
O00231	O00231;O00231-2	>SP|O00231|PSD11_HUMAN 26S proteasome non-ATPase regulatory subunit 11 OS=Homo sapiens OX=9606 GN=PSMD11 PE=1 SV=3;>SP|O00231-2|PSD11_HUMAN Isoform 2 of 26S proteasome non-ATPase regulatory subunit 11 OS=Homo sapiens OX=9606 GN=PSMD11	PSMD11	6;6	2	14654	68356	293810	90737	86623	267110	33711	75292	75542	343390	0.00478092	0.0324633	-1.11029	TB-EOT	Downregulated
O00232-2	O00232-2;O00232	>SP|O00232-2|PSD12_HUMAN Isoform 2 of 26S proteasome non-ATPase regulatory subunit 12 OS=Homo sapiens OX=9606 GN=PSMD12;>SP|O00232|PSD12_HUMAN 26S proteasome non-ATPase regulatory subunit 12 OS=Homo sapiens OX=9606 GN=PSMD12 PE=1 SV=3	PSMD12	5;5	2	5226.8	44820	159520	54415	47129	160230	28199	41938	36976	223130	0.0102388	0.0531278	-1.27056	TB-EOT	Non significant
O00299	O00299	>SP|O00299|CLIC1_HUMAN Chloride intracellular channel protein 1 OS=Homo sapiens OX=9606 GN=CLIC1 PE=1 SV=4	CLIC1	12	1	639700	885410	9997000	4523300	2504600	13329000	1068000	2154900	1915100	14099000	0.0450427	0.134333	-0.98474	TB-EOT	Non significant
O00303	O00303	>SP|O00303|EIF3F_HUMAN Eukaryotic translation initiation factor 3 subunit F OS=Homo sapiens OX=9606 GN=EIF3F PE=1 SV=1	EIF3F	4	1	9056.4	20141	96973	48101	64455	73490	15568	29988	61526	134090	0.448141	0.5922	-0.260997	TB-EOT	Non significant
O00391	O00391;O00391-2	>SP|O00391|QSOX1_HUMAN Sulfhydryl oxidase 1 OS=Homo sapiens OX=9606 GN=QSOX1 PE=1 SV=3;>SP|O00391-2|QSOX1_HUMAN Isoform 2 of Sulfhydryl oxidase 1 OS=Homo sapiens OX=9606 GN=QSOX1	QSOX1	10;9	2	563320	164660	658590	493000	542360	345680	94986	168130	1456500	346190	0.0875543	0.205245	1.06481	TB-EOT	Non significant
O00410-2	O00410-2;O00410;O00410-3;O60518	>SP|O00410-2|IPO5_HUMAN Isoform 2 of Importin-5 OS=Homo sapiens OX=9606 GN=IPO5;>SP|O00410|IPO5_HUMAN Importin-5 OS=Homo sapiens OX=9606 GN=IPO5 PE=1 SV=4;>SP|O00410-3|IPO5_HUMAN Isoform 3 of Importin-5 OS=Homo sapiens OX=9606 GN=IPO5	IPO5	4;4;4;1	4	6104.6	31633	175320	108140	68919	228850	11060	44598	40836	181030	0.0465459	0.137087	-1.12463	TB-EOT	Non significant
O00429-4	O00429-4;O00429-5;O00429-3;O00429-2;O00429;O00429-8;O00429-6;O00429-7	>SP|O00429-4|DNM1L_HUMAN Isoform 3 of Dynamin-1-like protein OS=Homo sapiens OX=9606 GN=DNM1L;>SP|O00429-5|DNM1L_HUMAN Isoform 5 of Dynamin-1-like protein OS=Homo sapiens OX=9606 GN=DNM1L;>SP|O00429-3|DNM1L_HUMAN Isoform 2 of Dynamin-1-like protein OS=Homo sa	DNM1L	5;5;5;5;5;5;5;4	8	15701	39370	181840	60874	46130	187230	44872	54974	43191	200480	0.0332132	0.109582	-0.788162	TB-EOT	Non significant
O00462	O00462	>SP|O00462|MANBA_HUMAN Beta-mannosidase OS=Homo sapiens OX=9606 GN=MANBA PE=2 SV=3	MANBA	16	1	537940	162790	484800	571610	335440	938590	163010	250030	1224400	1864700	0.549762	0.678724	0.304337	TB-EOT	Non significant
O00533	O00533;O00533-2	>SP|O00533|NCHL1_HUMAN Neural cell adhesion molecule L1-like protein OS=Homo sapiens OX=9606 GN=CHL1 PE=1 SV=4;>SP|O00533-2|NCHL1_HUMAN Isoform 2 of Neural cell adhesion molecule L1-like protein OS=Homo sapiens OX=9606 GN=CHL1	CHL1	5;5	2	124830	44453	205720	166560	219880	177760	132050	154740	566010	160080	0.000889565	0.0114663	1.46649	TB-EOT	Upregulated
O00534	O00534;O00534-3;O00534-2;O00534-4	>SP|O00534|VMA5A_HUMAN von Willebrand factor A domain-containing protein 5A OS=Homo sapiens OX=9606 GN=VWA5A PE=2 SV=2;>SP|O00534-3|VMA5A_HUMAN Isoform 3 of von Willebrand factor A domain-containing protein 5A OS=Homo sapiens OX=9606 GN=VWA5A;>SP|O00534-2|VMA	VWA5A	6;3;3;2	4	16316	19496	96014	84332	84994	117130	40500	62248	89453	164680	0.287295	0.449564	0.350634	TB-EOT	Non significant
O00584	O00584;O00584-2	>SP|O00584|RNT2_HUMAN Ribonuclease T2 OS=Homo sapiens OX=9606 GN=RNASET2 PE=1 SV=2	RNASET2	8;3	2	469540	119530	369550	318930	334160	476590	172160	201990	1310800	1122800	0.15803	0.304258	0.745356	TB-EOT	Non significant
O00592-2	O00592-2;O00592	>SP|O00592-2|PODXL_HUMAN Isoform 2 of Podocalyxin OS=Homo sapiens OX=9606 GN=PODXL;>SP|O00592|PODXL_HUMAN Podocalyxin OS=Homo sapiens OX=9606 GN=PODXL PE=1 SV=2	PODXL	4;4	2	683190	227510	507490	456590	826270	1245700	89026	163500	1132700	478720	0.416589	0.563953	0.509349	TB-EOT	Non significant
O00625	O00625	>SP|O00625|PIR_HUMAN Pirin OS=Homo sapiens OX=9606 GN=PIR PE=1 SV=1	PIR	4	1	62948	51316	274670	129060	103520	532410	39072	83258	377390	313600	0.524227	0.657336	-0.27413	TB-EOT	Non significant
O00743	O00743;O00743-3;O00743-2	>SP|O00743|PPP6_HUMAN Serine/threonine-protein phosphatase 6 catalytic subunit OS=Homo sapiens OX=9606 GN=PPP6C PE=1 SV=1;>SP|O00743-3|PPP6_HUMAN Isoform 3 of Serine/threonine-protein phosphatase 6 catalytic subunit OS=Homo sapiens OX=9606 GN=PPP6C;>SP|O00743	PPP6C	6;6;5	3	147360	78552	484440	230330	300370	480450	141510	131040	329520	694380	0.737719	0.825479	0.10382	TB-EOT	Non significant
O00754	O00754;O00754-2	>SP|O00754|MA2B1_HUMAN Lysosomal alpha-mannosidase OS=Homo sapiens OX=9606 GN=MAN2B1 PE=1 SV=3;>SP|O00754-2|MA2B1_HUMAN Isoform 2 of Lysosomal alpha-mannosidase OS=Homo sapiens OX=9606 GN=MAN2B1	MAN2B1	6;5	2	98184	92164	199720	189350	156850	605470	49790	71159	140220	1398800	0.0815789	0.197582	-0.874637	TB-EOT	Non significant
O00764	O00764;O00764-3;O00764-2	>SP|O00764|PDXK_HUMAN Pyridoxal kinase OS=Homo sapiens OX=9606 GN=PDXK PE=1 SV=1;>SP|O00764-3|PDXK_HUMAN Isoform 3 of Pyridoxal kinase OS=Homo sapiens OX=9606 GN=PDXK;>SP|O00764-2|PDXK_HUMAN Isoform 2 of Pyridoxal kinase OS=Homo sapiens OX=9606 GN=PDXK	PDXK	8;7;6	3	576910	156310	1476900	1124800	684220	1335000	354230	676140	1115900	2686500	0.310299	0.474337	0.412937	TB-EOT	Non significant
O14617-3	O14617-3;O14617-4;O14617-2;O14617;O14617-5	>SP|O14617-3|AP3D1_HUMAN Isoform 3 of AP-3 complex subunit delta-1 OS=Homo sapiens OX=9606 GN=AP3D1;>SP|O14617-4|AP3D1_HUMAN Isoform 4 of AP-3 complex subunit delta-1 OS=Homo sapiens OX=9606 GN=AP3D1;>SP|O14617-2|AP3D1_HUMAN Isoform 2 of AP-3 complex subunit	AP3D1	2;2;2;2;2	5	1920	6202.4	48334	5384.1	6745.2	18170	2130.8	6534.3	8953.6	25440	0.00494482	0.0332791	-1.2318	TB-EOT	Downregulated
O14618	O14618	>SP|O14618|CCS_HUMAN Copper chaperone for superoxide dismutase OS=Homo sapiens OX=9606 GN=CCS PE=1 SV=1	CCS	2	1	36401	21376	62502	40866	28003	64632	42943	31962	41698	76220	0.329142	0.489924	0.386638	TB-EOT	Non significant
O14638	O14638	>SP|O14638|ENPP3_HUMAN Ectonucleotide pyrophosphatase/phosphodiesterase family member 3 OS=Homo sapiens OX=9606 GN=ENPP3 PE=1 SV=2	ENPP3	2	1	25728	11695	57066	26170	67376	88883	14513	17098	153370	70445	0.343606	0.503007	0.472882	TB-EOT	Non significant
O14672-2	O14672-2;O14672	>SP|O14672-2|ADA10_HUMAN Isoform 2 of Disintegrin and metalloproteinase domain-containing protein 10 OS=Homo sapiens OX=9606 GN=ADAM10;>SP|O14672|ADA10_HUMAN Disintegrin and metalloproteinase domain-containing protein 10 OS=Homo sapiens OX=9606 GN=ADAM10 PE=	ADAM10	2;2	2	4501.3	8166.9	7806.5	9344.8	8780.7	17487	4366	5981.7	10405	22170	0.950585	0.970439	-0.0218044	TB-EOT	Non significant
O14686	O14686;O14686-3	>SP|O14686|KMT2D_HUMAN Histone-lysine N-methyltransferase 2D OS=Homo sapiens OX=9606 GN=KMT2D PE=1 SV=2;>SP|O14686-3|KMT2D_HUMAN Isoform 3 of Histone-lysine N-methyltransferase 2D OS=Homo sapiens OX=9606 GN=KMT2D	KMT2D	2;2	2	58217	96266	46824	85276	52714	52594	93662	71987	45025	64090	0.161585	0.308584	0.927977	TB-EOT	Non significant
O14744-5	O14744-5;O14744;O14744-3;O14744-2	>SP|O14744-5|ANM5_HUMAN Isoform 5 of Protein arginine N-methyltransferase 5 OS=Homo sapiens OX=9606 GN=PRMT5;>SP|O14744|ANM5_HUMAN Protein arginine N-methyltransferase 5 OS=Homo sapiens OX=9606 GN=PRMT5 PE=1 SV=4;>SP|O14744-3|ANM5_HUMAN Isoform 3 of Protein a	PRMT5	2;2;1;1	4	1878	8238	25553	13246	11341	42570	11038	13031	14930	37750	0.216905	0.372344	-0.533194	TB-EOT	Non significant
O14745	O14745;O14745-2	>SP|O14745|NHRF1_HUMAN Na(+)/H(+) exchange regulatory cofactor NHE-RF1 OS=Homo sapiens OX=9606 GN=SLC9A3R1 PE=1 SV=4;>SP|O14745-2|NHRF1_HUMAN Isoform 2 of Na(+)/H(+) exchange regulatory cofactor NHE-RF1 OS=Homo sapiens OX=9606 GN=SLC9A3R1	SLC9A3R1	10;7	2	896700	152970	840750	553870	721320	1057700	354570	343940	1645200	673010	0.0310727	0.106206	1.08662	TB-EOT	Non significant
O14773	O14773;O14773-2	>SP|O14773|TPP1_HUMAN Tripeptidyl-peptidase 1 OS=Homo sapiens OX=9606 GN=TPP1 PE=1 SV=2;>SP|O14773-2|TPP1_HUMAN Isoform 2 of Tripeptidyl-peptidase 1 OS=Homo sapiens OX=9606 GN=TPP1	TPP1	8;7	2	378620	315880	811340	438450	609940	1452700	109910	266610	504670	4645300	0.0790356	0.195046	-0.904128	TB-EOT	Non significant
O14786-3	O14786-3;O14786-2;O14786	>SP|O14786-3|NRP1_HUMAN Isoform 3 of Neuropilin-1 OS=Homo sapiens OX=9606 GN=NRP1;>SP|O14786-2|NRP1_HUMAN Isoform 2 of Neuropilin-1 OS=Homo sapiens OX=9606 GN=NRP1;>SP|O14786|NRP1_HUMAN Neuropilin-1 OS=Homo sapiens OX=9606 GN=NRP1 PE=1 SV=3	NRP1	6;6;6	3	36545	133750	249550	562640	221110	463290	96918	201650	99687	332760	0.938664	0.962716	-0.0394885	TB-EOT	Non significant
O14791-3	O14791-3;O14791;O14791-2	>SP|O14791-3|APOL1_HUMAN Isoform 3 of Apolipoprotein L1 OS=Homo sapiens OX=9606 GN=APOL1;>SP|O14791|APOL1_HUMAN Apolipoprotein L1 OS=Homo sapiens OX=9606 GN=APOL1 PE=1 SV=5;>SP|O14791-2|APOL1_HUMAN Isoform 2 of Apolipoprotein L1 OS=Homo sapiens OX=9606 GN=APO	APOL1	6;6;6	3	50467	46830	240860	498460	395950	96548	242820	835330	172380	99517	0.00285953	0.0227714	2.23568	TB-EOT	Upregulated
O14818	O14818;O14818-2;O14818-4;Q8TAA3-2;Q8TAA3-5;Q8TAA3	>SP|O14818|PSA7_HUMAN Proteasome subunit alpha type-7 OS=Homo sapiens OX=9606 GN=PSMA7 PE=1 SV=1;>SP|O14818-2|PSA7_HUMAN Isoform 2 of Proteasome subunit alpha type-7 OS=Homo sapiens OX=9606 GN=PSMA7	PSMA7	10;7;4;4;4;4	6	206840	482200	3237600	1444500	1769100	3204900	1319400	1227100	735900	5721400	0.35768	0.516159	-0.463658	TB-EOT	Non significant
O14908-2	O14908-2;O14908	>SP|O14908-2|GIPC1_HUMAN Isoform 2 of PDZ domain-containing protein GIPC1 OS=Homo sapiens OX=9606 GN=GIPC1;>SP|O14908|GIPC1_HUMAN PDZ domain-containing protein GIPC1 OS=Homo sapiens OX=9606 GN=GIPC1 PE=1 SV=2	GIPC1	2;2	2	9333.5	15094	30497	27464	17422	37383	18464	19984	18911	36260	0.56814	0.692975	0.19345	TB-EOT	Non significant
O14979-3	O14979-3;O14979-2;O14979;REV__Q8N0S2-3;REV__Q8N0S2-2;REV__Q8N0S2;REV__Q9ULL8-2;REV__Q9ULL8;Q14103-4;Q14103-3;Q14103-2;Q14103;Q9ULL8-2;Q9ULL8	>SP|O14979-3|HNRDL_HUMAN Isoform 3 of Heterogeneous nuclear ribonucleoprotein D-like OS=Homo sapiens OX=9606 GN=HNRNPDL;>SP|O14979-2|HNRDL_HUMAN Isoform 2 of Heterogeneous nuclear ribonucleoprotein D-like OS=Homo sapiens OX=9606 GN=HNRNPDL;>SP|O14979|HNRDL_HU	HNRNPDL;HNRNPD;SHROOM4	2;2;2;1;1;1;1;1;1;1;1;1;1;1	14	3609.1	2798.7	10458	4064.3	7536	7908	2718.5	1397.3	26944	14467	0.756782	0.837139	0.17432	TB-EOT	Non significant
O14980	O14980	>SP|O14980|XPO1_HUMAN Exportin-1 OS=Homo sapiens OX=9606 GN=XPO1 PE=1 SV=1	XPO1	9	1	26344	97595	577400	221500	152030	387270	66780	127860	137620	404320	0.0593868	0.16334	-0.748484	TB-EOT	Non significant
O15067	O15067	>SP|O15067|PUR4_HUMAN Phosphoribosylformylglycinamidine synthase OS=Homo sapiens OX=9606 GN=PFAS PE=1 SV=4	PFAS	3	1	7518.8	6636.6	41493	22681	30730	33810	13276	17339	22771	48542	0.337556	0.497984	0.279454	TB-EOT	Non significant
O15143	O15143;Q92747-2;Q92747	>SP|O15143|ARC1B_HUMAN Actin-related protein 2/3 complex subunit 1B OS=Homo sapiens OX=9606 GN=ARPC1B PE=1 SV=3	ARPC1B	12;1;1	3	166030	992810	3550700	809600	1257000	3745200	383790	818010	507780	6873900	0.000819667	0.011188	-1.63768	TB-EOT	Downregulated
O15144	O15144	>SP|O15144|ARPC2_HUMAN Actin-related protein 2/3 complex subunit 2 OS=Homo sapiens OX=9606 GN=ARPC2 PE=1 SV=1	ARPC2	15	1	631870	1849000	13906000	2016500	3967500	12733000	877610	1892800	2203500	22510000	0.00056457	0.00954123	-1.65287	TB-EOT	Downregulated
O15145	O15145	>SP|O15145|ARPC3_HUMAN Actin-related protein 2/3 complex subunit 3 OS=Homo sapiens OX=9606 GN=ARPC3 PE=1 SV=3	ARPC3	3	1	43503	53221	587060	122050	291630	464880	69670	101070	122330	1009800	0.0621699	0.167364	-0.872505	TB-EOT	Non significant
O15247	O15247	>SP|O15247|CLIC2_HUMAN Chloride intracellular channel protein 2 OS=Homo sapiens OX=9606 GN=CLIC2 PE=1 SV=3	CLIC2	4	1	8144.2	9880.9	63744	77210	23749	64639	70076	74068	24030	63740	0.289458	0.451669	0.662962	TB-EOT	Non significant
O15305	O15305;O15305-2	>SP|O15305|PMM2_HUMAN Phosphomannomutase 2 OS=Homo sapiens OX=9606 GN=PMM2 PE=1 SV=1;>SP|O15305-2|PMM2_HUMAN Isoform 2 of Phosphomannomutase 2 OS=Homo sapiens OX=9606 GN=PMM2	PMM2	5;3	2	28088	59608	272730	118910	323540	207930	97487	98288	138290	336670	0.866548	0.913388	0.0665428	TB-EOT	Non significant
O15355	O15355	>SP|O15355|PPM1G_HUMAN Protein phosphatase 1G OS=Homo sapiens OX=9606 GN=PPM1G PE=1 SV=1	PPM1G	4	1	42446	76910	204660	205350	109800	490440	59201	85822	259340	591030	0.218305	0.373459	-0.464829	TB-EOT	Non significant
O15371-2	O15371-2;O15371-3;O15371	>SP|O15371-2|EIF3D_HUMAN Isoform 2 of Eukaryotic translation initiation factor 3 subunit D OS=Homo sapiens OX=9606 GN=EIF3D;>SP|O15371-3|EIF3D_HUMAN Isoform 3 of Eukaryotic translation initiation factor 3 subunit D OS=Homo sapiens OX=9606 GN=EIF3D;>SP|O15371|	EIF3D	3;3;3	3	6567.2	50043	169310	90521	75633	274610	57483	54225	69519	460480	0.0463593	0.136918	-1.11159	TB-EOT	Non significant
O15372	O15372	>SP|O15372|EIF3H_HUMAN Eukaryotic translation initiation factor 3 subunit H OS=Homo sapiens OX=9606 GN=EIF3H PE=1 SV=1	EIF3H	2	1	8860.1	5792.5	18702	10413	14628	22415	8937.6	9556.6	24641	25832	0.153234	0.298806	0.446095	TB-EOT	Non significant
O15427	O15427	>SP|O15427|MOT4_HUMAN Monocarboxylate transporter 4 OS=Homo sapiens OX=9606 GN=SLC16A3 PE=1 SV=1	SLC16A3	2	1	4110.1	12536	26020	6588.6	13105	49925	5930.4	8384.4	6004.9	71642	0.00190174	0.0189056	-1.39895	TB-EOT	Downregulated
O15484	O15484	>SP|O15484|CAN5_HUMAN Calpain-5 OS=Homo sapiens OX=9606 GN=CAPN5 PE=1 SV=2	CAPN5	3	1	3135.1	2173.3	24594	10007	21834	40853	7410.2	8123.4	28309	18341	0.419865	0.563953	0.394096	TB-EOT	Non significant
O15498-2	O15498-2;O15498	>SP|O15498-2|YKT6_HUMAN Isoform 2 of Synaptobrevin homolog YKT6 OS=Homo sapiens OX=9606 GN=YKT6;>SP|O15498|YKT6_HUMAN Synaptobrevin homolog YKT6 OS=Homo sapiens OX=9606 GN=YKT6 PE=1 SV=1	YKT6	2;2	2	18680	20731	97817	66758	72551	144380	28085	38230	68835	149260	0.863069	0.910885	-0.0481648	TB-EOT	Non significant
O15511	O15511;O15511-2	>SP|O15511|ARPC5_HUMAN Actin-related protein 2/3 complex subunit 5 OS=Homo sapiens OX=9606 GN=ARPC5 PE=1 SV=3;>SP|O15511-2|ARPC5_HUMAN Isoform 2 of Actin-related protein 2/3 complex subunit 5 OS=Homo sapiens OX=9606 GN=ARPC5	ARPC5	8;7	2	348320	301300	1635800	327790	535050	1072000	199350	261050	494650	2052800	0.0503094	0.143566	-0.724057	TB-EOT	Non significant
O43242	O43242;O43242-2	>SP|O43242|PSMD3_HUMAN 26S proteasome non-ATPase regulatory subunit 3 OS=Homo sapiens OX=9606 GN=PSMD3 PE=1 SV=2;>SP|O43242-2|PSMD3_HUMAN Isoform 2 of 26S proteasome non-ATPase regulatory subunit 3 OS=Homo sapiens OX=9606 GN=PSMD3	PSMD3	5;4	2	34260	84114	325200	96473	112250	256010	59738	81345	93450	306980	0.0233542	0.088478	-0.677406	TB-EOT	Non significant
O43278-2	O43278-2;O43278	>SP|O43278-2|SPIT1_HUMAN Isoform 2 of Kunitz-type protease inhibitor 1 OS=Homo sapiens OX=9606 GN=SPINT1;>SP|O43278|SPIT1_HUMAN Kunitz-type protease inhibitor 1 OS=Homo sapiens OX=9606 GN=SPINT1 PE=1 SV=2	SPINT1	10;10	2	284180	421520	604350	1038600	507160	1007900	184470	268190	562890	733100	0.717722	0.8091	0.141995	TB-EOT	Non significant
O43396	O43396	>SP|O43396|TXNL1_HUMAN Thioredoxin-like protein 1 OS=Homo sapiens OX=9606 GN=TXNL1 PE=1 SV=3	TXNL1	9	1	258520	136500	716700	540890	413800	761800	255670	278320	759410	886800	0.135811	0.273601	0.450349	TB-EOT	Non significant
O43399-6	O43399-6;O43399-2;O43399-4;O43399;O43399-3;O43399-5;O43399-7	>SP|O43399-6|TPD54_HUMAN Isoform 6 of Tumor protein D54 OS=Homo sapiens OX=9606 GN=TPD52L2;>SP|O43399-2|TPD54_HUMAN Isoform 2 of Tumor protein D54 OS=Homo sapiens OX=9606 GN=TPD52L2;>SP|O43399-4|TPD54_HUMAN Isoform 4 of Tumor protein D54 OS=Homo sapiens OX=96	TPD52L2	5;5;5;5;5;5;5	7	102340	60530	272390	136650	100520	237100	75425	95127	195530	270440	0.588671	0.710046	0.170091	TB-EOT	Non significant
O43490-4	O43490-4;O43490-7;O43490-2;O43490;O43490-5;O43490-3;O43490-6	>SP|O43490-4|PROM1_HUMAN Isoform 4 of Prominin-1 OS=Homo sapiens OX=9606 GN=PROM1;>SP|O43490-7|PROM1_HUMAN Isoform 7 of Prominin-1 OS=Homo sapiens OX=9606 GN=PROM1;>SP|O43490-2|PROM1_HUMAN Isoform 2 of Prominin-1 OS=Homo sapiens OX=9606 GN=PROM1;>SP|O43490|PRO	PROM1	17;17;17;17;16;16;16	7	611430	280960	2512100	732770	2908400	2250300	574700	402860	3066700	1501700	0.309136	0.473988	0.525141	TB-EOT	Non significant
O43493-4	O43493-4;O43493-2;O43493-5;O43493-3;O43493;O43493-6	>SP|O43493-4|TGON2_HUMAN Isoform 4 of Trans-Golgi network integral membrane protein 2 OS=Homo sapiens OX=9606 GN=TGOLN2;>SP|O43493-2|TGON2_HUMAN Isoform TGN46 of Trans-Golgi network integral membrane protein 2 OS=Homo sapiens OX=9606 GN=TGOLN2;>SP|O43493-5|TG	TGOLN2	4;4;4;4;4;2	6	192910	121640	118190	250300	97263	309470	13508	53259	144850	103310	0.854409	0.904012	0.135402	TB-EOT	Non significant
O43583	O43583	>SP|O43583|DENR_HUMAN Density-regulated protein OS=Homo sapiens OX=9606 GN=DENR PE=1 SV=2	DENR	3	1	28043	74782	240710	83346	73455	321820	84803	61616	41897	342830	0.0213158	0.082497	-1.00955	TB-EOT	Non significant
O43592	O43592	>SP|O43592|XPOT_HUMAN Exportin-T OS=Homo sapiens OX=9606 GN=XPOT PE=1 SV=2	XPOT	3	1	6988	43175	120200	55106	36272	94825	17507	33346	48248	108330	0.0430163	0.13032	-0.801046	TB-EOT	Non significant
O43598	O43598;O43598-2	>SP|O43598|DNPH1_HUMAN 2-deoxynucleoside 5-phosphate N-hydrolase 1 OS=Homo sapiens OX=9606 GN=DNPH1 PE=1 SV=1;>SP|O43598-2|DNPH1_HUMAN Isoform 2 of 2-deoxynucleoside 5-phosphate N-hydrolase 1 OS=Homo sapiens OX=9606 GN=DNPH1	DNPH1	2;1	2	7653.3	13278	136010	123930	62196	401970	106060	71181	70600	212450	0.849372	0.900903	-0.130774	TB-EOT	Non significant
O43653	O43653	>SP|O43653|PSCA_HUMAN Prostate stem cell antigen OS=Homo sapiens OX=9606 GN=PSCA PE=1 SV=2	PSCA	2	1	140290	10365	249840	24127	174390	46523	16346	35812	441500	51715	0.130008	0.265783	1.40638	TB-EOT	Non significant
O43657	O43657	>SP|O43657|TSN6_HUMAN Tetraspanin-6 OS=Homo sapiens OX=9606 GN=TSPAN6 PE=1 SV=1	TSPAN6	2	1	143150	57960	271090	128730	293540	641270	171860	82026	611340	308650	0.282787	0.447109	0.541444	TB-EOT	Non significant
O43681	O43681	>SP|O43681|ASNA_HUMAN ATPase ASNA1 OS=Homo sapiens OX=9606 GN=ASNA1 PE=1 SV=2	ASNA1	3	1	14938	66532	166290	99794	77289	209930	23921	70014	82710	267940	0.0338422	0.109796	-0.796961	TB-EOT	Non significant
O43707	O43707;O43707-2;O43707-3	>SP|O43707|ACTN4_HUMAN Alpha-actinin-4 OS=Homo sapiens OX=9606 GN=ACTN4 PE=1 SV=2;>SP|O43707-2|ACTN4_HUMAN Isoform ACTN4ISO of Alpha-actinin-4 OS=Homo sapiens OX=9606 GN=ACTN4;>SP|O43707-3|ACTN4_HUMAN Isoform 3 of Alpha-actinin-4 OS=Homo sapiens OX=9606 GN=AC	ACTN4	29;23;18	3	8737400	4574800	35447000	13112000	27849000	33611000	6594900	9176600	12909000	55791000	0.680488	0.78233	-0.154653	TB-EOT	Non significant
O43719	O43719	>SP|O43719|HTSF1_HUMAN HIV Tat-specific factor 1 OS=Homo sapiens OX=9606 GN=HTATSF1 PE=1 SV=1	HTATSF1	3	1	16057	6656	16130	5291.9	6851.6	12226	6226.6	4144.6	17122	15715	0.624806	0.736865	0.269745	TB-EOT	Non significant
O43765	O43765	>SP|O43765|SGTA_HUMAN Small glutamine-rich tetratricopeptide repeat-containing protein alpha OS=Homo sapiens OX=9606 GN=SGTA PE=1 SV=1	SGTA	3	1	16434	12094	62538	67628	70090	75627	25787	38494	72626	77273	0.0196183	0.0781137	0.736253	TB-EOT	Non significant
O43776	O43776;O43776-2	>SP|O43776|SYNC_HUMAN Asparagine--tRNA ligase, cytoplasmic OS=Homo sapiens OX=9606 GN=NARS PE=1 SV=1	NARS	9;2	2	81537	247320	789140	178580	245180	679980	147990	171140	371170	1063600	0.00631556	0.039208	-0.91363	TB-EOT	Non significant
O43795-2	O43795-2;O43795;Q9UBC5	>SP|O43795-2|MYO1B_HUMAN Isoform 2 of Unconventional myosin-Ib OS=Homo sapiens OX=9606 GN=MYO1B;>SP|O43795|MYO1B_HUMAN Unconventional myosin-Ib OS=Homo sapiens OX=9606 GN=MYO1B PE=1 SV=3	MYO1B	7;7;2	3	26003	58264	164860	106240	97563	376210	60137	62643	54885	245380	0.0943537	0.217772	-0.624019	TB-EOT	Non significant
O43813	O43813	>SP|O43813|LANC1_HUMAN LanC-like protein 1 OS=Homo sapiens OX=9606 GN=LANCL1 PE=1 SV=1	LANCL1	3	1	7874.1	37490	88450	42775	30379	103760	41937	41562	58456	102150	0.321751	0.486354	-0.416467	TB-EOT	Non significant
O43847	O43847;O43847-2	>SP|O43847|NRDC_HUMAN Nardilysin OS=Homo sapiens OX=9606 GN=NRDC PE=1 SV=3;>SP|O43847-2|NRDC_HUMAN Isoform 2 of Nardilysin OS=Homo sapiens OX=9606 GN=NRDC	NRD1	10;10	2	28931	64509	357720	139980	113620	408170	81049	96258	115070	424270	0.0472744	0.138277	-0.685379	TB-EOT	Non significant
O43852	O43852;O43852-3;O43852-5;O43852-6;O43852-10;O43852-2;O43852-4;O43852-9;O43852-15;O43852-13;O43852-14;O43852-11;O43852-8;O43852-12;O43852-7	>SP|O43852|CALU_HUMAN Calumenin OS=Homo sapiens OX=9606 GN=CALU PE=1 SV=2;>SP|O43852-3|CALU_HUMAN Isoform 3 of Calumenin OS=Homo sapiens OX=9606 GN=CALU;>SP|O43852-5|CALU_HUMAN Isoform 5 of Calumenin OS=Homo sapiens OX=9606 GN=CALU;>SP|O43852-6|CALU_HUMAN Isof	CALU	9;9;7;7;6;6;6;5;5;4;4;4;2;1;1	15	588430	137350	1070100	670170	771830	728040	267850	326310	5820000	800320	0.0509277	0.144517	1.2952	TB-EOT	Non significant
O43865	O43865;O43865-2;Q96HN2-4;Q96HN2-3;Q96HN2-2;Q96HN2	>SP|O43865|SAHH2_HUMAN S-adenosylhomocysteine hydrolase-like protein 1 OS=Homo sapiens OX=9606 GN=AHCYL1 PE=1 SV=2;>SP|O43865-2|SAHH2_HUMAN Isoform 2 of S-adenosylhomocysteine hydrolase-like protein 1 OS=Homo sapiens OX=9606 GN=AHCYL1;>SP|Q96HN2-4|SAHH3_HUMAN	AHCYL1;AHCYL2	9;8;6;6;6;6	6	63823	142610	580790	215720	278950	376910	123860	184700	363190	524870	0.615368	0.732088	-0.149066	TB-EOT	Non significant
O43866	O43866	>SP|O43866|CD5L_HUMAN CD5 antigen-like OS=Homo sapiens OX=9606 GN=CD5L PE=1 SV=1	CD5L	11	1	198940	432690	373350	436620	759110	282830	2771500	2766100	474680	305560	0.0306576	0.105471	2.05476	TB-EOT	Non significant
O60218	O60218	>SP|O60218|AK1BA_HUMAN Aldo-keto reductase family 1 member B10 OS=Homo sapiens OX=9606 GN=AKR1B10 PE=1 SV=2	AKR1B10	8	1	364260	625750	4626100	908270	674510	15821000	90310	626840	670840	2270300	0.00737303	0.0432988	-1.96478	TB-EOT	Downregulated
O60234	O60234	>SP|O60234|GMFG_HUMAN Glia maturation factor gamma OS=Homo sapiens OX=9606 GN=GMFG PE=1 SV=1	GMFG	4	1	241150	150460	1197800	381650	513160	907180	186540	225520	308830	1456200	0.253051	0.414306	-0.403435	TB-EOT	Non significant
O60271-9	O60271-9;O60271-4;O60271-2;O60271;O60271-5;O60271-3	>SP|O60271-9|JIP4_HUMAN Isoform 6 of C-Jun-amino-terminal kinase-interacting protein 4 OS=Homo sapiens OX=9606 GN=SPAG9;>SP|O60271-4|JIP4_HUMAN Isoform 4 of C-Jun-amino-terminal kinase-interacting protein 4 OS=Homo sapiens OX=9606 GN=SPAG9;>SP|O60271-2|JIP4_H	SPAG9	4;4;4;3;2;1	6	21839	56669	175990	62786	54062	278620	28591	45991	53794	298580	0.000607382	0.00982796	-1.16833	TB-EOT	Downregulated
O60282-2	O60282-2;O60282;P33176;Q12840	>SP|O60282-2|KIF5C_HUMAN Isoform 2 of Kinesin heavy chain isoform 5C OS=Homo sapiens OX=9606 GN=KIF5C;>SP|O60282|KIF5C_HUMAN Kinesin heavy chain isoform 5C OS=Homo sapiens OX=9606 GN=KIF5C PE=1 SV=1;>SP|P33176|KINH_HUMAN Kinesin-1 heavy chain OS=Homo sapiens	KIF5C;KIF5B;KIF5A	2;2;2;2	4	930.05	5763.8	12316	7819.6	6867.2	15678	3468.8	4924.6	5276.4	14645	0.125633	0.262122	-0.618077	TB-EOT	Non significant
O60462-4	O60462-4;O60462-5;O60462-2;O60462-3;O60462;O60462-6	>SP|O60462-4|NRP2_HUMAN Isoform B0 of Neuropilin-2 OS=Homo sapiens OX=9606 GN=NRP2;>SP|O60462-5|NRP2_HUMAN Isoform B5 of Neuropilin-2 OS=Homo sapiens OX=9606 GN=NRP2;>SP|O60462-2|NRP2_HUMAN Isoform A0 of Neuropilin-2 OS=Homo sapiens OX=9606 GN=NRP2;>SP|O60462-	NRP2	5;5;5;5;5;4	6	39273	58897	117220	242380	164590	185570	33588	72304	140360	132790	0.191677	0.34495	0.514873	TB-EOT	Non significant
O60493-2	O60493-2;O60493-4;O60493	>SP|O60493-2|SNX3_HUMAN Isoform 2 of Sorting nexin-3 OS=Homo sapiens OX=9606 GN=SNX3;>SP|O60493-4|SNX3_HUMAN Isoform 4 of Sorting nexin-3 OS=Homo sapiens OX=9606 GN=SNX3;>SP|O60493|SNX3_HUMAN Sorting nexin-3 OS=Homo sapiens OX=9606 GN=SNX3 PE=1 SV=3	SNX3	3;3;3	3	35632	89827	250130	65261	66309	284650	52467	52497	55457	332210	0.00190127	0.0189056	-1.14628	TB-EOT	Downregulated
O60502-2	O60502-2;O60502-4;O60502;O60502-3	>SP|O60502-2|OGA_HUMAN Isoform 2 of Protein O-GlcNAcase OS=Homo sapiens OX=9606 GN=OGA;>SP|O60502-4|OGA_HUMAN Isoform 4 of Protein O-GlcNAcase OS=Homo sapiens OX=9606 GN=OGA;>SP|O60502|OGA_HUMAN Protein O-GlcNAcase OS=Homo sapiens OX=9606 GN=OGA PE=1 SV=2;>SP|	MGEA5	3;3;3;2	4	7152.3	13651	60561	48061	33388	97246	20706	25859	15994	115010	0.235518	0.393219	-0.502681	TB-EOT	Non significant
O60547-2	O60547-2;O60547	>SP|O60547-2|GMDS_HUMAN Isoform 2 of GDP-mannose 4,6 dehydratase OS=Homo sapiens OX=9606 GN=GMDS;>SP|O60547|GMDS_HUMAN GDP-mannose 4,6 dehydratase OS=Homo sapiens OX=9606 GN=GMDS PE=1 SV=1	GMDS	5;5	2	16033	27848	141470	86190	149670	108250	40628	53354	300520	88963	0.141202	0.280743	0.724928	TB-EOT	Non significant
O60610-2	O60610-2;O60610-3;O60610	>SP|O60610-2|DIAP1_HUMAN Isoform 2 of Protein diaphanous homolog 1 OS=Homo sapiens OX=9606 GN=DIAPH1;>SP|O60610-3|DIAP1_HUMAN Isoform 3 of Protein diaphanous homolog 1 OS=Homo sapiens OX=9606 GN=DIAPH1;>SP|O60610|DIAP1_HUMAN Protein diaphanous homolog 1 OS=Ho	DIAPH1	14;14;14	3	180870	117590	758820	246240	290800	569180	67697	162730	293490	853890	0.229651	0.385966	-0.434768	TB-EOT	Non significant
O60635	O60635	>SP|O60635|TSN1_HUMAN Tetraspanin-1 OS=Homo sapiens OX=9606 GN=TSPAN1 PE=1 SV=2	TSPAN1	2	1	3380.8	1264.1	11347	1591.8	11492	13198	2315	1521.1	21559	7318.9	0.676267	0.778655	0.281112	TB-EOT	Non significant
O60664-4	O60664-4;O60664-3;O60664;O60664-2	>SP|O60664-4|PLIN3_HUMAN Isoform 4 of Perilipin-3 OS=Homo sapiens OX=9606 GN=PLIN3;>SP|O60664-3|PLIN3_HUMAN Isoform 3 of Perilipin-3 OS=Homo sapiens OX=9606 GN=PLIN3;>SP|O60664|PLIN3_HUMAN Perilipin-3 OS=Homo sapiens OX=9606 GN=PLIN3 PE=1 SV=3	PLIN3	6;6;6;2	4	99922	38177	396730	182350	216520	245030	45725	99444	260350	315270	0.380349	0.5359	0.340818	TB-EOT	Non significant
O60701-2	O60701-2;O60701;O60701-3	>SP|O60701-2|UGDH_HUMAN Isoform 2 of UDP-glucose 6-dehydrogenase OS=Homo sapiens OX=9606 GN=UGDH;>SP|O60701|UGDH_HUMAN UDP-glucose 6-dehydrogenase OS=Homo sapiens OX=9606 GN=UGDH PE=1 SV=1;>SP|O60701-3|UGDH_HUMAN Isoform 3 of UDP-glucose 6-dehydrogenase OS=Ho	UGDH	7;7;5	3	14279	29306	89548	54482	92143	117740	41026	44338	123790	85307	0.336052	0.496731	0.346075	TB-EOT	Non significant
O60711	O60711;O60711-2	>SP|O60711|LPXN_HUMAN Leupaxin OS=Homo sapiens OX=9606 GN=LPXN PE=1 SV=1;>SP|O60711-2|LPXN_HUMAN Isoform 2 of Leupaxin OS=Homo sapiens OX=9606 GN=LPXN	LPXN	3;3	2	4976	17582	88459	26758	14621	50318	10898	13888	12746	75610	0.00557985	0.0363332	-1.12667	TB-EOT	Downregulated
O60749	O60749;O60749-2	>SP|O60749|SNX2_HUMAN Sorting nexin-2 OS=Homo sapiens OX=9606 GN=SNX2 PE=1 SV=2;>SP|O60749-2|SNX2_HUMAN Isoform 2 of Sorting nexin-2 OS=Homo sapiens OX=9606 GN=SNX2	SNX2	6;5	2	89664	203430	1043100	270510	333510	884790	90491	235120	219030	1441700	0.00229596	0.021037	-1.12052	TB-EOT	Downregulated
O60763	O60763;O60763-2;REV__Q5VZ89-5;REV__Q5VZ89-3;REV__Q5VZ89;REV__Q5VZ89-7	>SP|O60763|USO1_HUMAN General vesicular transport factor p115 OS=Homo sapiens OX=9606 GN=USO1 PE=1 SV=2;>SP|O60763-2|USO1_HUMAN Isoform 2 of General vesicular transport factor p115 OS=Homo sapiens OX=9606 GN=USO1	USO1	10;10;1;1;1;1	6	301200	90821	995710	326450	418230	735470	75483	202820	565290	856650	0.967456	0.982791	-0.0186535	TB-EOT	Non significant
O60784	O60784;O60784-3;O60784-4;O60784-2	>SP|O60784|TOM1_HUMAN Target of Myb protein 1 OS=Homo sapiens OX=9606 GN=TOM1 PE=1 SV=2;>SP|O60784-3|TOM1_HUMAN Isoform 3 of Target of Myb protein 1 OS=Homo sapiens OX=9606 GN=TOM1;>SP|O60784-4|TOM1_HUMAN Isoform 4 of Target of Myb protein 1 OS=Homo sapiens O	TOM1	6;5;5;5	4	188720	184080	347330	384150	289360	596110	120630	189190	221080	537230	0.859063	0.907385	0.0588693	TB-EOT	Non significant
O60841	O60841	>SP|O60841|IF2P_HUMAN Eukaryotic translation initiation factor 5B OS=Homo sapiens OX=9606 GN=EIF5B PE=1 SV=4	EIF5B	2	1	17575	44639	51261	19828	22648	32719	13992	15917	36056	42944	0.624993	0.736865	-0.227199	TB-EOT	Non significant
O60884	O60884	>SP|O60884|DNJA2_HUMAN DnaJ homolog subfamily A member 2 OS=Homo sapiens OX=9606 GN=DNAJA2 PE=1 SV=1	DNAJA2	2	1	15889	6274.7	42248	17147	5364.8	32873	4261	14917	64058	39760	0.990119	0.993385	0.00752918	TB-EOT	Non significant
O75083	O75083;O75083-3	>SP|O75083|WDR1_HUMAN WD repeat-containing protein 1 OS=Homo sapiens OX=9606 GN=WDR1 PE=1 SV=4	WDR1	22;10	2	621990	1471200	13976000	4155100	6282600	9577600	1875700	2675600	3012400	13107000	0.134077	0.271907	-0.652869	TB-EOT	Non significant
O75131	O75131	>SP|O75131|CPNE3_HUMAN Copine-3 OS=Homo sapiens OX=9606 GN=CPNE3 PE=1 SV=1	CPNE3	7	1	485720	77405	411310	240320	766330	951720	269230	432510	569760	894430	0.0679139	0.176576	0.925951	TB-EOT	Non significant
O75223	O75223;O75223-3	>SP|O75223|GGCT_HUMAN Gamma-glutamylcyclotransferase OS=Homo sapiens OX=9606 GN=GGCT PE=1 SV=1;>SP|O75223-3|GGCT_HUMAN Isoform 3 of Gamma-glutamylcyclotransferase OS=Homo sapiens OX=9606 GN=GGCT	GGCT	5;3	2	1031900	200950	895960	474680	410480	1254200	537490	304480	1160800	1230200	0.310117	0.474337	0.534255	TB-EOT	Non significant
O75347	O75347;O75347-2	>SP|O75347|TBCA_HUMAN Tubulin-specific chaperone A OS=Homo sapiens OX=9606 GN=TBCA PE=1 SV=3;>SP|O75347-2|TBCA_HUMAN Isoform 2 of Tubulin-specific chaperone A OS=Homo sapiens OX=9606 GN=TBCA	TBCA	7;4	2	385810	168920	623000	424520	313190	888480	277360	228070	593730	717480	0.370163	0.526678	0.328518	TB-EOT	Non significant
O75351	O75351;Q9UN37;Q6PIW4-2;Q6PIW4	>SP|O75351|VPS4B_HUMAN Vacuolar protein sorting-associated protein 4B OS=Homo sapiens OX=9606 GN=VPS4B PE=1 SV=2;>SP|Q9UN37|VPS4A_HUMAN Vacuolar protein sorting-associated protein 4A OS=Homo sapiens OX=9606 GN=VPS4A PE=1 SV=1;>SP|Q6PIW4-2|FIGL1_HUMAN Isoform	VPS4B;VPS4A;FIGNL1	2;1;1;1	4	2925.8	31495	55428	46026	20964	63325	13441	17654	24531	74759	0.0724089	0.185629	-0.892259	TB-EOT	Non significant
O75367-2	O75367-2;O75367-3;O75367	>SP|O75367-2|H2AY_HUMAN Isoform 1 of Core histone macro-H2A.1 OS=Homo sapiens OX=9606 GN=H2AFY;>SP|O75367-3|H2AY_HUMAN Isoform 3 of Core histone macro-H2A.1 OS=Homo sapiens OX=9606 GN=H2AFY;>SP|O75367|H2AY_HUMAN Core histone macro-H2A.1 OS=Homo sapiens OX=960	H2AFY	3;3;3	3	32979	17955	81831	60133	282480	84777	40011	51830	41964	217390	0.24934	0.409112	0.602136	TB-EOT	Non significant
O75368	O75368	>SP|O75368|SH3L1_HUMAN SH3 domain-binding glutamic acid-rich-like protein OS=Homo sapiens OX=9606 GN=SH3BGRL PE=1 SV=1	SH3BGRL	5	1	230040	35550	223910	119450	162940	219090	42377	73786	202390	370780	0.393409	0.54299	0.434538	TB-EOT	Non significant
O75369-6	O75369-6;O75369-3;O75369-2;O75369-9;O75369;O75369-8;O75369-5;O75369-4;O75369-7	>SP|O75369-6|FLNB_HUMAN Isoform 6 of Filamin-B OS=Homo sapiens OX=9606 GN=FLNB;>SP|O75369-3|FLNB_HUMAN Isoform 3 of Filamin-B OS=Homo sapiens OX=9606 GN=FLNB;>SP|O75369-2|FLNB_HUMAN Isoform 2 of Filamin-B OS=Homo sapiens OX=9606 GN=FLNB;>SP|O75369-9|FLNB_HUMAN	FLNB	25;25;25;25;25;25;21;21;22	9	290470	143580	877900	692780	677100	1141200	450660	610950	1129600	763670	0.0107218	0.0545413	0.893843	TB-EOT	Non significant
O75436	O75436;O75436-2	>SP|O75436|VP26A_HUMAN Vacuolar protein sorting-associated protein 26A OS=Homo sapiens OX=9606 GN=VPS26A PE=1 SV=2;>SP|O75436-2|VP26A_HUMAN Isoform 2 of Vacuolar protein sorting-associated protein 26A OS=Homo sapiens OX=9606 GN=VPS26A	VPS26A	13;9	2	407760	969320	4742300	1213800	1519400	4095200	696510	913560	1175100	6509800	0.00229423	0.021037	-1.01538	TB-EOT	Downregulated
O75503	O75503	>SP|O75503|CLN5_HUMAN Ceroid-lipofuscinosis neuronal protein 5 OS=Homo sapiens OX=9606 GN=CLN5 PE=1 SV=2	CLN5	7	1	104770	151340	404300	418600	373330	549260	209670	228380	382540	1223600	0.854363	0.904012	0.0578068	TB-EOT	Non significant
O75563	O75563	>SP|O75563|SKAP2_HUMAN Src kinase-associated phosphoprotein 2 OS=Homo sapiens OX=9606 GN=SKAP2 PE=1 SV=1	SKAP2	4	1	65103	47864	297970	65070	104510	270640	5311.1	51845	52414	676260	0.0321384	0.108147	-1.53419	TB-EOT	Non significant
O75608-2	O75608-2;O75608	>SP|O75608-2|LYPA1_HUMAN Isoform 2 of Acyl-protein thioesterase 1 OS=Homo sapiens OX=9606 GN=LYPLA1;>SP|O75608|LYPA1_HUMAN Acyl-protein thioesterase 1 OS=Homo sapiens OX=9606 GN=LYPLA1 PE=1 SV=1	LYPLA1	2;2	2	22146	7371.5	85544	57346	76197	140010	25291	39970	74483	164700	0.402853	0.551521	0.369353	TB-EOT	Non significant
O75636-2	O75636-2;O75636	>SP|O75636-2|FCN3_HUMAN Isoform 2 of Ficolin-3 OS=Homo sapiens OX=9606 GN=FCN3;>SP|O75636|FCN3_HUMAN Ficolin-3 OS=Homo sapiens OX=9606 GN=FCN3 PE=1 SV=2	FCN3	3;3	2	96018	38756	73291	171530	218630	32105	225150	284580	159620	88601	0.000106057	0.00456573	2.63185	TB-EOT	Upregulated
O75663-2	O75663-2;O75663	>SP|O75663-2|TIPRL_HUMAN Isoform 2 of TIP41-like protein OS=Homo sapiens OX=9606 GN=TIPRL;>SP|O75663|TIPRL_HUMAN TIP41-like protein OS=Homo sapiens OX=9606 GN=TIPRL PE=1 SV=2	TIPRL	3;3	2	59486	70539	367780	183240	303650	521810	93658	137640	184110	601620	0.45655	0.599666	-0.233964	TB-EOT	Non significant
O75688-5	O75688-5;O75688-4;O75688-2;O75688	>SP|O75688-5|PPM1B_HUMAN Isoform 5 of Protein phosphatase 1B OS=Homo sapiens OX=9606 GN=PPM1B;>SP|O75688-4|PPM1B_HUMAN Isoform 4 of Protein phosphatase 1B OS=Homo sapiens OX=9606 GN=PPM1B;>SP|O75688-2|PPM1B_HUMAN Isoform Beta-2 of Protein phosphatase 1B OS=Ho	PPM1B	3;3;3;3	4	27438	10016	81810	37352	70720	83512	17914	23012	62800	146730	0.650549	0.757066	0.176718	TB-EOT	Non significant
O75695	O75695	>SP|O75695|XRP2_HUMAN Protein XRP2 OS=Homo sapiens OX=9606 GN=RP2 PE=1 SV=4	RP2	2	1	20523	11262	60935	31074	54708	94602	16297	17252	36605	96096	0.8845	0.924636	-0.0492387	TB-EOT	Non significant
O75822	O75822;O75822-2;O75822-3	>SP|O75822|EIF3J_HUMAN Eukaryotic translation initiation factor 3 subunit J OS=Homo sapiens OX=9606 GN=EIF3J PE=1 SV=2;>SP|O75822-2|EIF3J_HUMAN Isoform 2 of Eukaryotic translation initiation factor 3 subunit J OS=Homo sapiens OX=9606 GN=EIF3J;>SP|O75822-3|EIF	EIF3J	5;4;4	3	371510	153570	594390	262110	217560	983050	114210	155060	417440	979670	0.396539	0.545824	-0.372442	TB-EOT	Non significant
O75832	O75832;O75832-2	>SP|O75832|PSD10_HUMAN 26S proteasome non-ATPase regulatory subunit 10 OS=Homo sapiens OX=9606 GN=PSMD10 PE=1 SV=1;>SP|O75832-2|PSD10_HUMAN Isoform 2 of 26S proteasome non-ATPase regulatory subunit 10 OS=Homo sapiens OX=9606 GN=PSMD10	PSMD10	2;1	2	4714.9	1085.5	15688	14118	14973	19560	8101.6	5849	20685	30584	0.0994251	0.22437	0.845039	TB-EOT	Non significant
O75874	O75874;P9WKL1	>SP|O75874|IDHC_HUMAN Isocitrate dehydrogenase [NADP] cytoplasmic OS=Homo sapiens OX=9606 GN=IDH1 PE=1 SV=2	IDH1	18;1	2	376300	1476200	6129300	1532500	3039900	3608100	751270	968540	1759000	7141800	0.0191274	0.077176	-0.91462	TB-EOT	Non significant
O75882-2	O75882-2;O75882;O75882-3	>SP|O75882-2|ATRN_HUMAN Isoform 2 of Attractin OS=Homo sapiens OX=9606 GN=ATRN;>SP|O75882|ATRN_HUMAN Attractin OS=Homo sapiens OX=9606 GN=ATRN PE=1 SV=2;>SP|O75882-3|ATRN_HUMAN Isoform 3 of Attractin OS=Homo sapiens OX=9606 GN=ATRN	ATRN	24;24;23	3	3003100	1837200	3441200	5130600	4875900	5159900	2627100	4170600	5194800	3168100	0.002665	0.0219984	1.19484	TB-EOT	Upregulated
O75884-2	O75884-2;O75884	>SP|O75884-2|RBBP9_HUMAN Isoform 2 of Putative hydrolase RBBP9 OS=Homo sapiens OX=9606 GN=RBBP9;>SP|O75884|RBBP9_HUMAN Putative hydrolase RBBP9 OS=Homo sapiens OX=9606 GN=RBBP9 PE=1 SV=2	RBBP9	3;3	2	2718.9	9015.2	64800	65551	19800	64028	22414	35663	17525	57460	0.813793	0.880573	-0.141666	TB-EOT	Non significant
O75976-2	O75976-2;O75976	>SP|O75976-2|CBPD_HUMAN Isoform 2 of Carboxypeptidase D OS=Homo sapiens OX=9606 GN=CPD;>SP|O75976|CBPD_HUMAN Carboxypeptidase D OS=Homo sapiens OX=9606 GN=CPD PE=1 SV=2	CPD	2;2	2	25259	7091.1	51904	40476	65223	37249	11112	16367	131870	29750	0.0172975	0.0730821	1.29371	TB-EOT	Non significant
O75995	O75995	>SP|O75995|SASH3_HUMAN SAM and SH3 domain-containing protein 3 OS=Homo sapiens OX=9606 GN=SASH3 PE=1 SV=2	SASH3	4	1	152080	77470	425120	114350	116250	536930	29741	54595	137790	692630	0.0388795	0.120685	-1.06753	TB-EOT	Non significant
O76003	O76003	>SP|O76003|GLRX3_HUMAN Glutaredoxin-3 OS=Homo sapiens OX=9606 GN=GLRX3 PE=1 SV=2	GLRX3	6	1	51154	47514	323360	185800	133070	340890	73095	104280	182210	381060	0.765877	0.845354	-0.0869156	TB-EOT	Non significant
O76071	O76071	>SP|O76071|CIAO1_HUMAN Probable cytosolic iron-sulfur protein assembly protein CIAO1 OS=Homo sapiens OX=9606 GN=CIAO1 PE=1 SV=1	CIAO1	3	1	4741.4	22922	47729	24875	21907	27943	16582	23671	16656	48323	0.532256	0.663031	-0.264644	TB-EOT	Non significant
O94760	O94760;O94760-2	>SP|O94760|DDAH1_HUMAN N(G),N(G)-dimethylarginine dimethylaminohydrolase 1 OS=Homo sapiens OX=9606 GN=DDAH1 PE=1 SV=3;>SP|O94760-2|DDAH1_HUMAN Isoform 2 of N(G),N(G)-dimethylarginine dimethylaminohydrolase 1 OS=Homo sapiens OX=9606 GN=DDAH1	DDAH1	9;7	2	150350	219800	1084500	1938300	275520	2894000	832320	869060	875700	1310900	0.770679	0.848193	0.177395	TB-EOT	Non significant
O94832	O94832	>SP|O94832|MYO1D_HUMAN Unconventional myosin-Id OS=Homo sapiens OX=9606 GN=MYO1D PE=1 SV=2	MYO1D	6	1	24335	43050	149020	72527	89889	222120	36383	61567	87152	232140	0.132171	0.269119	-0.409621	TB-EOT	Non significant
O94855	O94855;O94855-2	>SP|O94855|SC24D_HUMAN Protein transport protein Sec24D OS=Homo sapiens OX=9606 GN=SEC24D PE=1 SV=2;>SP|O94855-2|SC24D_HUMAN Isoform 2 of Protein transport protein Sec24D OS=Homo sapiens OX=9606 GN=SEC24D	SEC24D	2;2	2	1187.8	2389.6	23800	5975.8	6261.9	20507	3096.4	5903.7	7779.7	19979	0.100156	0.225351	-0.665358	TB-EOT	Non significant
O94979-6	O94979-6;O94979-3;O94979-10;O94979-4;O94979-9;O94979-2;O94979;O94979-8;O94979-7;O94979-5	>SP|O94979-6|SC31A_HUMAN Isoform 6 of Protein transport protein Sec31A OS=Homo sapiens OX=9606 GN=SEC31A;>SP|O94979-3|SC31A_HUMAN Isoform 3 of Protein transport protein Sec31A OS=Homo sapiens OX=9606 GN=SEC31A;>SP|O94979-10|SC31A_HUMAN Isoform 10 of Protein t	SEC31A	5;5;5;5;5;5;5;5;4;2	10	28707	35170	201300	84994	90950	165330	47899	49629	113480	247560	0.463531	0.605176	-0.203408	TB-EOT	Non significant
O95218-2	O95218-2;O95218	>SP|O95218-2|ZRAB2_HUMAN Isoform 2 of Zinc finger Ran-binding domain-containing protein 2 OS=Homo sapiens OX=9606 GN=ZRANB2;>SP|O95218|ZRAB2_HUMAN Zinc finger Ran-binding domain-containing protein 2 OS=Homo sapiens OX=9606 GN=ZRANB2 PE=1 SV=2	ZRANB2	2;2	2	34554	14508	38516	52030	37593	49371	51401	36522	65574	45692	0.00245773	0.0212684	1.28326	TB-EOT	Upregulated
O95336	O95336	>SP|O95336|6PGL_HUMAN 6-phosphogluconolactonase OS=Homo sapiens OX=9606 GN=PGLS PE=1 SV=2	PGLS	8	1	165160	243240	1209200	1083200	907900	2120100	675850	624470	553030	2453700	0.8424	0.897919	-0.0829279	TB-EOT	Non significant
O95352-3	O95352-3;O95352-2;O95352	>SP|O95352-3|ATG7_HUMAN Isoform 3 of Ubiquitin-like modifier-activating enzyme ATG7 OS=Homo sapiens OX=9606 GN=ATG7;>SP|O95352-2|ATG7_HUMAN Isoform 2 of Ubiquitin-like modifier-activating enzyme ATG7 OS=Homo sapiens OX=9606 GN=ATG7;>SP|O95352|ATG7_HUMAN Ubiqu	ATG7	2;2;2	3	10123	31783	121460	44509	56499	104800	14453	22306	32598	145010	0.00755859	0.0437134	-0.928308	TB-EOT	Non significant
O95373	O95373;O15397-2;O15397	>SP|O95373|IPO7_HUMAN Importin-7 OS=Homo sapiens OX=9606 GN=IPO7 PE=1 SV=1	IPO7	5;1;1	3	12993	25533	135290	79903	51636	157640	22022	36411	44065	156580	0.0789779	0.195046	-0.592535	TB-EOT	Non significant
O95379	O95379;O95379-3;O95379-2;O95379-4	>SP|O95379|TFIP8_HUMAN Tumor necrosis factor alpha-induced protein 8 OS=Homo sapiens OX=9606 GN=TNFAIP8 PE=1 SV=1	TNFAIP8	3;1;1;1	4	30923	68516	317390	71664	92694	385370	31398	64072	44271	553900	0.00051648	0.00924196	-1.48889	TB-EOT	Downregulated
O95394	O95394;O95394-3;O95394-4	>SP|O95394|AGM1_HUMAN Phosphoacetylglucosamine mutase OS=Homo sapiens OX=9606 GN=PGM3 PE=1 SV=1;>SP|O95394-3|AGM1_HUMAN Isoform 2 of Phosphoacetylglucosamine mutase OS=Homo sapiens OX=9606 GN=PGM3;>SP|O95394-4|AGM1_HUMAN Isoform 3 of Phosphoacetylglucosamine	PGM3	6;6;6	3	24893	36318	308020	200190	154530	290290	39801	106380	128520	361500	0.551639	0.67995	-0.240111	TB-EOT	Non significant
O95433	O95433;O95433-2	>SP|O95433|AHSA1_HUMAN Activator of 90 kDa heat shock protein ATPase homolog 1 OS=Homo sapiens OX=9606 GN=AHSA1 PE=1 SV=1;>SP|O95433-2|AHSA1_HUMAN Isoform 2 of Activator of 90 kDa heat shock protein ATPase homolog 1 OS=Homo sapiens OX=9606 GN=AHSA1	AHSA1	5;3	2	56621	118160	324130	280100	314740	446360	134790	146570	206570	383630	0.811155	0.880005	0.0732778	TB-EOT	Non significant
O95445	O95445;O95445-2	>SP|O95445|APOM_HUMAN Apolipoprotein M OS=Homo sapiens OX=9606 GN=APOM PE=1 SV=2;>SP|O95445-2|APOM_HUMAN Isoform 2 of Apolipoprotein M OS=Homo sapiens OX=9606 GN=APOM	APOM	4;3	2	99476	91362	149770	236970	296080	51895	121360	239540	389610	48468	0.000860617	0.011188	2.29283	TB-EOT	Upregulated
O95467	O95467	>SP|O95467|GNAS3_HUMAN Neuroendocrine secretory protein 55 OS=Homo sapiens OX=9606 GN=GNAS PE=2 SV=1	GNAS	2	1	42171	8079.9	13844	23891	18590	5451.9	4811.9	11076	380850	3740.3	0.0120525	0.0580352	2.81883	TB-EOT	Non significant
O95497	O95497	>SP|O95497|VNN1_HUMAN Pantetheinase OS=Homo sapiens OX=9606 GN=VNN1 PE=1 SV=2	VNN1	3	1	64137	12732	34652	37460	56700	32355	15108	34987	44944	36426	0.00735172	0.0432988	1.37561	TB-EOT	Upregulated
O95747	O95747;Q9UEW8-2;Q9UEW8	>SP|O95747|OXSR1_HUMAN Serine/threonine-protein kinase OSR1 OS=Homo sapiens OX=9606 GN=OXSR1 PE=1 SV=1	OXSR1	5;2;2	3	20449	21595	104960	51375	45348	94989	38701	59468	56739	153670	0.909901	0.94211	0.0348425	TB-EOT	Non significant
O95757	O95757	>SP|O95757|HS74L_HUMAN Heat shock 70 kDa protein 4L OS=Homo sapiens OX=9606 GN=HSPA4L PE=1 SV=3	HSPA4L	2	1	18071	9058.1	53362	26583	30743	65066	24386	23847	40854	30636	0.0917678	0.212126	0.618919	TB-EOT	Non significant
O95782-2	O95782-2;O95782;O94973-3;O94973;O94973-2	>SP|O95782-2|AP2A1_HUMAN Isoform B of AP-2 complex subunit alpha-1 OS=Homo sapiens OX=9606 GN=AP2A1;>SP|O95782|AP2A1_HUMAN AP-2 complex subunit alpha-1 OS=Homo sapiens OX=9606 GN=AP2A1 PE=1 SV=3	AP2A1	3;3;1;1;1	5	5312	11504	60007	36535	29553	51483	13461	18033	28115	57405	0.579772	0.703216	-0.179009	TB-EOT	Non significant
O95810	O95810	>SP|O95810|CAVN2_HUMAN Caveolae-associated protein 2 OS=Homo sapiens OX=9606 GN=CAVIN2 PE=1 SV=3	SDPR	3	1	22433	37392	56090	87438	15290	53245	66177	92174	41090	76568	0.362261	0.520301	0.568372	TB-EOT	Non significant
O95834	O95834;O95834-2;O95834-3;Q05BV3-4;O00423;O00423-3;Q05BV3-2;Q6ZMW3-2;Q6ZMW3;Q05BV3;Q05BV3-5	>SP|O95834|EMAL2_HUMAN Echinoderm microtubule-associated protein-like 2 OS=Homo sapiens OX=9606 GN=EML2 PE=1 SV=1;>SP|O95834-2|EMAL2_HUMAN Isoform 2 of Echinoderm microtubule-associated protein-like 2 OS=Homo sapiens OX=9606 GN=EML2;>SP|O95834-3|EMAL2_HUMAN I	EML2	14;14;14;1;1;1;1;1;1;1;1	11	287930	436010	2060900	1235800	1796700	2770300	1416700	1073000	1084900	2795400	0.666782	0.77065	0.170367	TB-EOT	Non significant
O95861	O95861;O95861-2;O95861-3;O95861-4	>SP|O95861|BPNT1_HUMAN 3(2),5-bisphosphate nucleotidase 1 OS=Homo sapiens OX=9606 GN=BPNT1 PE=1 SV=1;>SP|O95861-2|BPNT1_HUMAN Isoform 2 of 3(2),5-bisphosphate nucleotidase 1 OS=Homo sapiens OX=9606 GN=BPNT1;>SP|O95861-3|BPNT1_HUMAN Isoform 3 of 3(2),5	BPNT1	7;7;6;6	4	70879	87371	395450	354100	317310	584330	202860	184250	258260	906480	0.948623	0.970238	0.0224767	TB-EOT	Non significant
O95865	O95865	>SP|O95865|DDAH2_HUMAN N(G),N(G)-dimethylarginine dimethylaminohydrolase 2 OS=Homo sapiens OX=9606 GN=DDAH2 PE=1 SV=1	DDAH2	5	1	19024	50930	261810	224640	55457	151320	65456	158150	45183	277070	0.601377	0.721937	-0.292279	TB-EOT	Non significant
O95989	O95989	>SP|O95989|NUDT3_HUMAN Diphosphoinositol polyphosphate phosphohydrolase 1 OS=Homo sapiens OX=9606 GN=NUDT3 PE=1 SV=1	NUDT3	3	1	37160	12729	84441	40989	56200	91580	29834	33016	53348	111810	0.299718	0.463755	0.353847	TB-EOT	Non significant
O95994	O95994	>SP|O95994|AGR2_HUMAN Anterior gradient protein 2 homolog OS=Homo sapiens OX=9606 GN=AGR2 PE=1 SV=1	AGR2	2	1	66007	42985	480630	152950	117000	119220	203930	146560	1744600	180070	0.0803482	0.196572	1.31087	TB-EOT	Non significant
O96009	O96009	>SP|O96009|NAPSA_HUMAN Napsin-A OS=Homo sapiens OX=9606 GN=NAPSA PE=1 SV=1	NAPSA	8	1	494470	1315100	2656300	3712500	2472300	6203700	124440	548180	449740	11923000	0.0376628	0.118603	-1.62007	TB-EOT	Non significant
P00325	P00325;P00325-2	>SP|P00325|ADH1B_HUMAN Alcohol dehydrogenase 1B OS=Homo sapiens OX=9606 GN=ADH1B PE=1 SV=2;>SP|P00325-2|ADH1B_HUMAN Isoform 2 of Alcohol dehydrogenase 1B OS=Homo sapiens OX=9606 GN=ADH1B	ADH1B	2;1	2	13209	25106	85941	402410	49265	67352	931870	1102900	141220	68285	0.0334476	0.109652	2.56531	TB-EOT	Non significant
P00326	P00326	>SP|P00326|ADH1G_HUMAN Alcohol dehydrogenase 1C OS=Homo sapiens OX=9606 GN=ADH1C PE=1 SV=2	ADH1C	4	1	156360	467710	7380800	2455000	646220	4951800	6103600	5082600	1353200	5298700	0.823908	0.88751	-0.204523	TB-EOT	Non significant
P00338	P00338;P00338-3;P00338-4;P00338-5;P00338-2;Q6ZMR3;P07864	>SP|P00338|LDHA_HUMAN L-lactate dehydrogenase A chain OS=Homo sapiens OX=9606 GN=LDHA PE=1 SV=2;>SP|P00338-3|LDHA_HUMAN Isoform 3 of L-lactate dehydrogenase A chain OS=Homo sapiens OX=9606 GN=LDHA;>SP|P00338-4|LDHA_HUMAN Isoform 4 of L-lactate dehydrogenase A	LDHA	11;11;8;7;7;0;0	7	195980	854040	3070700	743930	2463200	1844800	451750	616470	2053700	2705700	0.319464	0.485419	-0.450844	TB-EOT	Non significant
P00352	P00352	>SP|P00352|AL1A1_HUMAN Retinal dehydrogenase 1 OS=Homo sapiens OX=9606 GN=ALDH1A1 PE=1 SV=2	ALDH1A1	21	1	958200	2685200	16583000	7458100	8979700	23713000	4686100	6614200	16126000	21343000	0.57664	0.700534	-0.262786	TB-EOT	Non significant
P00390-2	P00390-2;P00390;P00390-3;P00390-4;P00390-5	>SP|P00390-2|GSHR_HUMAN Isoform Cytoplasmic of Glutathione reductase, mitochondrial OS=Homo sapiens OX=9606 GN=GSR;>SP|P00390|GSHR_HUMAN Glutathione reductase, mitochondrial OS=Homo sapiens OX=9606 GN=GSR PE=1 SV=2;>SP|P00390-3|GSHR_HUMAN Isoform 2 of Glutath	GSR	14;14;13;12;11	5	649130	1097200	4879700	778800	1540200	5308200	763780	878630	2361800	7388000	0.00683849	0.0412751	-1.02058	TB-EOT	Downregulated
P00441	P00441	>SP|P00441|SODC_HUMAN Superoxide dismutase [Cu-Zn] OS=Homo sapiens OX=9606 GN=SOD1 PE=1 SV=2	SOD1	4	1	2617100	322090	1436800	1003200	800280	6556900	1036100	622860	4142300	2171100	0.389365	0.540351	0.592343	TB-EOT	Non significant
P00450	P00450	>SP|P00450|CERU_HUMAN Ceruloplasmin OS=Homo sapiens OX=9606 GN=CP PE=1 SV=1	CP	31	1	15880000	6354400	21508000	37696000	83490000	8787200	21717000	40259000	38595000	13062000	2.66509e-05	0.00374789	2.48159	TB-EOT	Upregulated
P00488	P00488	>SP|P00488|F13A_HUMAN Coagulation factor XIII A chain OS=Homo sapiens OX=9606 GN=F13A1 PE=1 SV=4	F13A1	12	1	73250	118360	887150	547170	457710	511540	466190	558550	398810	483960	0.172783	0.321669	0.667761	TB-EOT	Non significant
P00491	P00491	>SP|P00491|PNPH_HUMAN Purine nucleoside phosphorylase OS=Homo sapiens OX=9606 GN=PNP PE=1 SV=2	PNP	14	1	163240	443620	3303000	1124000	1014800	2456900	739470	723010	912590	4214300	0.0972099	0.221342	-0.700214	TB-EOT	Non significant
P00492	P00492	>SP|P00492|HPRT_HUMAN Hypoxanthine-guanine phosphoribosyltransferase OS=Homo sapiens OX=9606 GN=HPRT1 PE=1 SV=2	HPRT1	6	1	106620	334770	1142900	571050	592650	1542400	640490	416430	417970	1997400	0.21583	0.370934	-0.528238	TB-EOT	Non significant
P00505	P00505;P00505-2	>SP|P00505|AATM_HUMAN Aspartate aminotransferase, mitochondrial OS=Homo sapiens OX=9606 GN=GOT2 PE=1 SV=3;>SP|P00505-2|AATM_HUMAN Isoform 2 of Aspartate aminotransferase, mitochondrial OS=Homo sapiens OX=9606 GN=GOT2	GOT2	8;6	2	30505	78692	293200	197510	114300	241680	162710	105040	80913	674420	0.332925	0.493547	-0.462625	TB-EOT	Non significant
P00558	P00558;P00558-2;P07205	>SP|P00558|PGK1_HUMAN Phosphoglycerate kinase 1 OS=Homo sapiens OX=9606 GN=PGK1 PE=1 SV=3;>SP|P00558-2|PGK1_HUMAN Isoform 2 of Phosphoglycerate kinase 1 OS=Homo sapiens OX=9606 GN=PGK1	PGK1	23;22;4	3	948400	3423600	30385000	6220200	4620200	17743000	4819400	5643900	4491400	34674000	0.0189844	0.0771304	-1.1839	TB-EOT	Non significant
P00568	P00568;Q9Y6K8-2;Q9Y6K8-3;Q9Y6K8	>SP|P00568|KAD1_HUMAN Adenylate kinase isoenzyme 1 OS=Homo sapiens OX=9606 GN=AK1 PE=1 SV=3	AK1	7;1;1;1	4	155790	259810	414900	592630	348620	821270	572480	486880	368660	487990	0.177029	0.325194	0.617193	TB-EOT	Non significant
P00734	P00734;CON__P00735	>SP|P00734|THRB_HUMAN Prothrombin OS=Homo sapiens OX=9606 GN=F2 PE=1 SV=2	F2	24;6	2	1813100	2740200	4654900	10256000	6052300	3674400	4680900	10196000	4159100	3836600	0.0105951	0.054443	1.39264	TB-EOT	Non significant
P00736	P00736	>SP|P00736|C1R_HUMAN Complement C1r subcomponent OS=Homo sapiens OX=9606 GN=C1R PE=1 SV=2	C1R	15	1	529250	429980	1130300	1227800	3536200	737570	2130700	2476200	2292100	725810	0.000430168	0.0080776	2.14236	TB-EOT	Upregulated
P00738	P00738;P00738-2	>SP|P00738|HPT_HUMAN Haptoglobin OS=Homo sapiens OX=9606 GN=HP PE=1 SV=1;>SP|P00738-2|HPT_HUMAN Isoform 2 of Haptoglobin OS=Homo sapiens OX=9606 GN=HP	HP	12;11	2	62040000	9392900	21554000	40229000	46719000	6115500	43595000	88960000	44441000	10227000	0.000139695	0.00479297	3.15466	TB-EOT	Upregulated
P00740	P00740;P00740-2	>SP|P00740|FA9_HUMAN Coagulation factor IX OS=Homo sapiens OX=9606 GN=F9 PE=1 SV=2;>SP|P00740-2|FA9_HUMAN Isoform 2 of Coagulation factor IX OS=Homo sapiens OX=9606 GN=F9	F9	9;7	2	52776	218250	299790	2245400	81250	173380	385180	687800	471550	190130	0.118795	0.252021	1.455	TB-EOT	Non significant
P00742	P00742	>SP|P00742|FA10_HUMAN Coagulation factor X OS=Homo sapiens OX=9606 GN=F10 PE=1 SV=2	F10	9	1	82423	219470	422610	798190	359260	238710	616930	781200	401180	308930	0.0328495	0.109331	1.3597	TB-EOT	Non significant
P00747	P00747;CON__P06868;Q15195;Q02325	>SP|P00747|PLMN_HUMAN Plasminogen OS=Homo sapiens OX=9606 GN=PLG PE=1 SV=2	PLG	36;3;1;1	4	1641500	8800500	7673600	15900000	8065800	2845600	14523000	24231000	5898200	3336000	0.0606235	0.16568	1.64911	TB-EOT	Non significant
P00748	P00748	>SP|P00748|FA12_HUMAN Coagulation factor XII OS=Homo sapiens OX=9606 GN=F12 PE=1 SV=3	F12	11	1	126920	2001100	1440900	1173600	1686100	583030	1271500	784100	1163100	667080	0.4946	0.631492	0.519385	TB-EOT	Non significant
P00751	P00751;P00751-2	>SP|P00751|CFAB_HUMAN Complement factor B OS=Homo sapiens OX=9606 GN=CFB PE=1 SV=2;>SP|P00751-2|CFAB_HUMAN Isoform 2 of Complement factor B OS=Homo sapiens OX=9606 GN=CFB	CFB	29;15	2	3054100	13766000	22718000	55109000	41173000	11072000	21426000	40056000	25290000	13243000	0.0299815	0.104352	1.51353	TB-EOT	Non significant
P00915	P00915	>SP|P00915|CAH1_HUMAN Carbonic anhydrase 1 OS=Homo sapiens OX=9606 GN=CA1 PE=1 SV=2	CA1	11	1	880840	496220	6566500	6559900	738430	645980	11748000	4152100	2572600	552170	0.030719	0.105471	2.31388	TB-EOT	Non significant
P00918	P00918	>SP|P00918|CAH2_HUMAN Carbonic anhydrase 2 OS=Homo sapiens OX=9606 GN=CA2 PE=1 SV=2	CA2	11	1	382510	882270	3224000	2427300	758900	4031000	5476400	2044200	769640	6982300	0.68619	0.7871	-0.289746	TB-EOT	Non significant
P00966	P00966	>SP|P00966|ASSY_HUMAN Argininosuccinate synthase OS=Homo sapiens OX=9606 GN=ASS1 PE=1 SV=2	ASS1	3	1	4590.7	13490	129260	51675	85445	47174	22289	41690	125980	55175	0.382886	0.537242	0.519555	TB-EOT	Non significant
P01008	P01008	>SP|P01008|ANT3_HUMAN Antithrombin-III OS=Homo sapiens OX=9606 GN=SERPINC1 PE=1 SV=1	SERPINC1	21	1	6098700	15449000	24195000	41217000	23170000	14847000	17911000	28432000	28731000	14692000	0.0260561	0.0948943	1.16933	TB-EOT	Non significant
P01009	P01009;P01009-2;P01009-3	>SP|P01009|A1AT_HUMAN Alpha-1-antitrypsin OS=Homo sapiens OX=9606 GN=SERPINA1 PE=1 SV=3;>SP|P01009-2|A1AT_HUMAN Isoform 2 of Alpha-1-antitrypsin OS=Homo sapiens OX=9606 GN=SERPINA1;>SP|P01009-3|A1AT_HUMAN Isoform 3 of Alpha-1-antitrypsin OS=Homo sapiens OX=96	SERPINA1	24;20;16	3	70767000	95621000	126120000	266900000	148940000	121750000	130070000	293950000	68629000	85341000	0.0436694	0.131396	1.25664	TB-EOT	Non significant
P01011	P01011;P01011-2	>SP|P01011|AACT_HUMAN Alpha-1-antichymotrypsin OS=Homo sapiens OX=9606 GN=SERPINA3 PE=1 SV=2	SERPINA3	16;5	2	5017600	2858800	12757000	25373000	38993000	5829100	12094000	33242000	15843000	6333900	0.000141804	0.00479297	2.41098	TB-EOT	Upregulated
P01019	P01019	>SP|P01019|ANGT_HUMAN Angiotensinogen OS=Homo sapiens OX=9606 GN=AGT PE=1 SV=1	AGT	8	1	411020	543480	1088200	4592700	4772600	763530	1042200	2424900	1852400	756510	0.000857727	0.011188	2.14446	TB-EOT	Upregulated
P01023	P01023;P20742-2	>SP|P01023|A2MG_HUMAN Alpha-2-macroglobulin OS=Homo sapiens OX=9606 GN=A2M PE=1 SV=3	A2M	51;0	2	4999100	6093000	44892000	48602000	59570000	10684000	48062000	123890000	49764000	12673000	0.00367937	0.0270354	2.39618	TB-EOT	Upregulated
P01024	P01024;CON__Q2UVX4;O95568	>SP|P01024|CO3_HUMAN Complement C3 OS=Homo sapiens OX=9606 GN=C3 PE=1 SV=2	C3	89;10;1	3	18110000	17493000	56536000	79216000	145530000	33228000	48699000	121450000	51931000	24773000	0.00153811	0.0168307	1.932	TB-EOT	Upregulated
P01031	P01031;CON__Q1A7A4	>SP|P01031|CO5_HUMAN Complement C5 OS=Homo sapiens OX=9606 GN=C5 PE=1 SV=4	C5	16;2	2	215960	332180	801190	1004400	2095500	416470	986560	1898000	1090800	490950	0.00256778	0.0217484	1.88943	TB-EOT	Upregulated
P01033	P01033	>SP|P01033|TIMP1_HUMAN Metalloproteinase inhibitor 1 OS=Homo sapiens OX=9606 GN=TIMP1 PE=1 SV=1	TIMP1	5	1	387040	277460	1094500	364030	1405900	399840	369470	418940	2197100	604120	0.0354871	0.113633	1.15094	TB-EOT	Non significant
P01034	P01034	>SP|P01034|CYTC_HUMAN Cystatin-C OS=Homo sapiens OX=9606 GN=CST3 PE=1 SV=1	CST3	4	1	797610	479620	2053400	1303200	1727900	1966900	446320	447420	4486200	1439400	0.210382	0.36404	0.601867	TB-EOT	Non significant
P01036	P01036	>SP|P01036|CYTS_HUMAN Cystatin-S OS=Homo sapiens OX=9606 GN=CST4 PE=1 SV=3	CST4	2	1	1349600	28452	122600	1427600	272600	137410	58711	2112900	2794000	149690	0.000727603	0.0109573	3.8894	TB-EOT	Upregulated
P01037	P01037	>SP|P01037|CYTN_HUMAN Cystatin-SN OS=Homo sapiens OX=9606 GN=CST1 PE=1 SV=3	CST1	2	1	44929	2719.9	10692	47208	15974	16714	5792	75233	73541	9396.2	0.000758827	0.0110979	2.82075	TB-EOT	Upregulated
P01040	P01040	>SP|P01040|CYTA_HUMAN Cystatin-A OS=Homo sapiens OX=9606 GN=CSTA PE=1 SV=1	CSTA	2	1	157610	56865	127570	107890	106970	168700	30769	46445	166030	156190	0.388293	0.539847	0.421633	TB-EOT	Non significant
P01042-2	P01042-2;P01042;P01042-3;CON__P01045-1;CON__Q2KJ62;CON__P01044-1	>SP|P01042-2|KNG1_HUMAN Isoform LMW of Kininogen-1 OS=Homo sapiens OX=9606 GN=KNG1;>SP|P01042|KNG1_HUMAN Kininogen-1 OS=Homo sapiens OX=9606 GN=KNG1 PE=1 SV=2;>SP|P01042-3|KNG1_HUMAN Isoform 3 of Kininogen-1 OS=Homo sapiens OX=9606 GN=KNG1	KNG1	22;20;19;1;1;1	6	7433000	6716300	8602500	29245000	16926000	4096200	9811400	22971000	19823000	4286800	0.000524987	0.00928494	2.35578	TB-EOT	Upregulated
P01591	P01591	>SP|P01591|IGJ_HUMAN Immunoglobulin J chain OS=Homo sapiens OX=9606 GN=JCHAIN PE=1 SV=4	IGJ	7	1	6750700	3952900	10448000	56383000	5020300	10446000	2983000	4847500	28732000	2106900	0.0480382	0.139287	1.66676	TB-EOT	Non significant
P01602	P01602	>SP|P01602|KV105_HUMAN Immunoglobulin kappa variable 1-5 OS=Homo sapiens OX=9606 GN=IGKV1-5 PE=1 SV=2	IGKV1-5	2	1	1074700	158870	270060	1109700	589150	251530	403380	499010	912510	98085	0.000223398	0.00615419	2.83596	TB-EOT	Upregulated
P01619	P01619	>SP|P01619|KV320_HUMAN Immunoglobulin kappa variable 3-20 OS=Homo sapiens OX=9606 GN=IGKV3-20 PE=1 SV=2		2	1	498740	187850	524510	1751000	761900	560800	776970	732780	1046000	160330	0.000269095	0.0063594	2.33942	TB-EOT	Upregulated
P01700	P01700;P01699	>SP|P01700|LV147_HUMAN Immunoglobulin lambda variable 1-47 OS=Homo sapiens OX=9606 GN=IGLV1-47 PE=1 SV=2;>SP|P01699|LV144_HUMAN Immunoglobulin lambda variable 1-44 OS=Homo sapiens OX=9606 GN=IGLV1-44 PE=1 SV=2		2;1	2	62969	82141	383810	787760	302180	167750	243920	334230	385520	135780	0.00543578	0.0356372	1.6263	TB-EOT	Upregulated
P01714	P01714	>SP|P01714|LV319_HUMAN Immunoglobulin lambda variable 3-19 OS=Homo sapiens OX=9606 GN=IGLV3-19 PE=1 SV=2		3	1	178800	161520	374800	1722900	953750	334220	955670	1626700	1118700	275790	0.000141776	0.00479297	2.56727	TB-EOT	Upregulated
P01717	P01717;P01718	>SP|P01717|LV325_HUMAN Immunoglobulin lambda variable 3-25 OS=Homo sapiens OX=9606 GN=IGLV3-25 PE=1 SV=2		2;1	2	21941	8624.9	34249	186340	91089	37631	41147	72303	81053	37323	2.11089e-05	0.00374789	2.2561	TB-EOT	Upregulated
P01780	P01780;A0A0B4J1V1;P01763;P01762	>SP|P01780|HV307_HUMAN Immunoglobulin heavy variable 3-7 OS=Homo sapiens OX=9606 GN=IGHV3-7 PE=1 SV=2;>SP|A0A0B4J1V1|HV321_HUMAN Immunoglobulin heavy variable 3-21 OS=Homo sapiens OX=9606 GN=IGHV3-21 PE=1 SV=1;>SP|P01763|HV348_HUMAN Immunoglobulin heavy varia	IGHV3-21	2;0;0;0	4	1144800	356640	1536600	4550600	1803400	1032900	1196000	2324100	3692600	531980	5.89163e-05	0.00421529	2.38881	TB-EOT	Upregulated
P01833	P01833	>SP|P01833|PIGR_HUMAN Polymeric immunoglobulin receptor OS=Homo sapiens OX=9606 GN=PIGR PE=1 SV=4	PIGR	32	1	22411000	15709000	51079000	151570000	53896000	53877000	4575500	8056700	76008000	19818000	0.32541	0.487226	0.752597	TB-EOT	Non significant
P01834	P01834	>SP|P01834|IGKC_HUMAN Immunoglobulin kappa constant OS=Homo sapiens OX=9606 GN=IGKC PE=1 SV=2	IGKC	6	1	13290000	2274700	13072000	22167000	16860000	6658600	8803600	15769000	22140000	3569800	4.79117e-05	0.00421529	2.46837	TB-EOT	Upregulated
P01857	P01857	>SP|P01857|IGHG1_HUMAN Immunoglobulin heavy constant gamma 1 OS=Homo sapiens OX=9606 GN=IGHG1 PE=1 SV=1	IGHG1	6	1	5174000	6569100	16570000	7551300	20529000	7790100	6656000	30197000	14376000	4286200	0.0293701	0.103059	1.42449	TB-EOT	Non significant
P01859	P01859	>SP|P01859|IGHG2_HUMAN Immunoglobulin heavy constant gamma 2 OS=Homo sapiens OX=9606 GN=IGHG2 PE=1 SV=2	IGHG2	4	1	338320	1530100	2297800	3336700	6836100	2890200	1672600	7674700	1937500	1177000	0.0958249	0.219823	1.22638	TB-EOT	Non significant
P01860	P01860	>SP|P01860|IGHG3_HUMAN Immunoglobulin heavy constant gamma 3 OS=Homo sapiens OX=9606 GN=IGHG3 PE=1 SV=2	IGHG3	4	1	692650	558760	1357900	1708900	3179200	993440	659600	5821200	3136300	527810	0.00219598	0.0206353	2.10677	TB-EOT	Upregulated
P01861	P01861	>SP|P01861|IGHG4_HUMAN Immunoglobulin heavy constant gamma 4 OS=Homo sapiens OX=9606 GN=IGHG4 PE=1 SV=1	IGHG4	5	1	1660300	1471800	5592700	2896100	13022000	1948400	1701500	6169100	2838300	1013600	0.019582	0.0781137	1.66251	TB-EOT	Non significant
P01871	P01871;P01871-2	>SP|P01871|IGHM_HUMAN Immunoglobulin heavy constant mu OS=Homo sapiens OX=9606 GN=IGHM PE=1 SV=4;>SP|P01871-2|IGHM_HUMAN Isoform 2 of Immunoglobulin heavy constant mu OS=Homo sapiens OX=9606 GN=IGHM	IGHM	19;18	2	10452000	7018000	7158700	13953000	53072000	4936400	31678000	59419000	28692000	5779100	0.000273384	0.0063594	3.00924	TB-EOT	Upregulated
P01876	P01876	>SP|P01876|IGHA1_HUMAN Immunoglobulin heavy constant alpha 1 OS=Homo sapiens OX=9606 GN=IGHA1 PE=1 SV=2	IGHA1	10	1	38494000	18992000	63675000	174900000	131660000	35083000	49236000	74539000	132550000	15086000	0.000137232	0.00479297	2.47699	TB-EOT	Upregulated
P01877	P01877	>SP|P01877|IGHA2_HUMAN Immunoglobulin heavy constant alpha 2 OS=Homo sapiens OX=9606 GN=IGHA2 PE=1 SV=4	IGHA2	8	1	5255700	531150	2756300	8388200	10774000	3469000	5820500	6470200	10813000	1839400	3.61073610758579e-7	0.000274596	2.97832	TB-EOT	Upregulated
P01880	P01880;P01880-2	>SP|P01880|IGHD_HUMAN Immunoglobulin heavy constant delta OS=Homo sapiens OX=9606 GN=IGHD PE=1 SV=3;>SP|P01880-2|IGHD_HUMAN Isoform 2 of Immunoglobulin heavy constant delta OS=Homo sapiens OX=9606 GN=IGHD	IGHD	10;10	2	971280	769110	1039400	2180000	7450500	541860	2323400	6650000	1032600	1322700	0.00317209	0.0244911	2.38747	TB-EOT	Upregulated
P01903	P01903	>SP|P01903|DRA_HUMAN HLA class II histocompatibility antigen, DR alpha chain OS=Homo sapiens OX=9606 GN=HLA-DRA PE=1 SV=1	HLA-DRA	5	1	229970	135340	701170	278650	475340	887560	133400	168210	249700	2175900	0.157054	0.303627	-0.616742	TB-EOT	Non significant
P02042	P02042	>SP|P02042|HBD_HUMAN Hemoglobin subunit delta OS=Homo sapiens OX=9606 GN=HBD PE=1 SV=2	HBD	5	1	1548400	469230	4848100	4815600	941910	698070	8855000	4193400	1361200	973900	0.0240013	0.0902948	2.11202	TB-EOT	Non significant
P02545-2	P02545-2;P02545-6;P02545-3;P02545;P02545-5;P02545-4;Q03252	>SP|P02545-2|LMNA_HUMAN Isoform C of Prelamin-A/C OS=Homo sapiens OX=9606 GN=LMNA;>SP|P02545-6|LMNA_HUMAN Isoform 6 of Prelamin-A/C OS=Homo sapiens OX=9606 GN=LMNA;>SP|P02545-3|LMNA_HUMAN Isoform ADelta10 of Prelamin-A/C OS=Homo sapiens OX=9606 GN=LMNA;>SP|P02	LMNA	4;4;4;4;3;3;0	7	310690	154130	364960	222300	227190	275210	86551	140610	360260	443370	0.424701	0.569137	0.349488	TB-EOT	Non significant
P02647	P02647;CON__P15497	>SP|P02647|APOA1_HUMAN Apolipoprotein A-I OS=Homo sapiens OX=9606 GN=APOA1 PE=1 SV=1	APOA1	17;1	2	10442000	18109000	30654000	49681000	17881000	7186700	17379000	63607000	60659000	9136600	0.0124878	0.0595423	1.93766	TB-EOT	Non significant
P02649	P02649;CON__Q03247	>SP|P02649|APOE_HUMAN Apolipoprotein E OS=Homo sapiens OX=9606 GN=APOE PE=1 SV=1	APOE	19;4	2	441180	1916200	4695200	4938000	4458400	4157700	676390	2347400	1390100	4292900	0.631914	0.743231	-0.237435	TB-EOT	Non significant
P02652	P02652	>SP|P02652|APOA2_HUMAN Apolipoprotein A-II OS=Homo sapiens OX=9606 GN=APOA2 PE=1 SV=1	APOA2	3	1	279610	1443800	1735900	1820500	1206300	358520	917170	1286400	2314200	471300	0.0864935	0.204598	1.2915	TB-EOT	Non significant
P02654	P02654	>SP|P02654|APOC1_HUMAN Apolipoprotein C-I OS=Homo sapiens OX=9606 GN=APOC1 PE=1 SV=1	APOC1	4	1	148260	258110	457430	399400	538450	583670	207010	302120	825520	687950	0.195759	0.347937	0.415915	TB-EOT	Non significant
P02671	P02671;P02671-2;CON__P02672	>SP|P02671|FIBA_HUMAN Fibrinogen alpha chain OS=Homo sapiens OX=9606 GN=FGA PE=1 SV=2;>SP|P02671-2|FIBA_HUMAN Isoform 2 of Fibrinogen alpha chain OS=Homo sapiens OX=9606 GN=FGA	FGA	33;32;2	3	1855300	1002000	19335000	26414000	26751000	2529800	34832000	15564000	2858400	4139700	0.0183604	0.0765098	2.43355	TB-EOT	Non significant
P02675	P02675;CON__P02676	>SP|P02675|FIBB_HUMAN Fibrinogen beta chain OS=Homo sapiens OX=9606 GN=FGB PE=1 SV=2	FGB	31;5	2	3682400	435650	13551000	17874000	68910000	2441100	29600000	19262000	2988900	3414100	0.00301378	0.0236287	3.26585	TB-EOT	Upregulated
P02679-2	P02679-2;P02679	>SP|P02679-2|FIBG_HUMAN Isoform Gamma-A of Fibrinogen gamma chain OS=Homo sapiens OX=9606 GN=FGG;>SP|P02679|FIBG_HUMAN Fibrinogen gamma chain OS=Homo sapiens OX=9606 GN=FGG PE=1 SV=3	FGG	29;29	2	7994300	550550	22944000	29017000	195360000	4070600	53406000	48670000	5051100	5538200	0.00247502	0.0212684	3.67698	TB-EOT	Upregulated
P02730-2	P02730-2;P02730	>SP|P02730-2|B3AT_HUMAN Isoform 2 of Band 3 anion transport protein OS=Homo sapiens OX=9606 GN=SLC4A1;>SP|P02730|B3AT_HUMAN Band 3 anion transport protein OS=Homo sapiens OX=9606 GN=SLC4A1 PE=1 SV=3	SLC4A1	3;3	2	39551	27148	50394	144650	27922	21726	290050	151760	21277	29956	0.0336154	0.109796	2.1034	TB-EOT	Non significant
P02741	P02741;P02741-2	>SP|P02741|CRP_HUMAN C-reactive protein OS=Homo sapiens OX=9606 GN=CRP PE=1 SV=1;>SP|P02741-2|CRP_HUMAN Isoform 2 of C-reactive protein OS=Homo sapiens OX=9606 GN=CRP	CRP	4;2	2	482600	104070	585540	200590	1887500	94874	1891200	1245200	478940	199750	0.00307219	0.0239631	2.91709	TB-EOT	Upregulated
P02743	P02743	>SP|P02743|SAMP_HUMAN Serum amyloid P-component OS=Homo sapiens OX=9606 GN=APCS PE=1 SV=2	APCS	6	1	1867900	1198000	3037900	24617000	3068100	1182700	11021000	11316000	3696900	1455400	0.00162828	0.0171575	2.8604	TB-EOT	Upregulated
P02746	P02746	>SP|P02746|C1QB_HUMAN Complement C1q subcomponent subunit B OS=Homo sapiens OX=9606 GN=C1QB PE=1 SV=3	C1QB	2	1	20820	24276	56904	83498	197210	31181	114560	113900	44999	32048	0.00363837	0.0268639	2.0166	TB-EOT	Upregulated
P02747	P02747	>SP|P02747|C1QC_HUMAN Complement C1q subcomponent subunit C OS=Homo sapiens OX=9606 GN=C1QC PE=1 SV=3	C1QC	2	1	18320	57194	104630	118030	403880	29554	292680	249250	125800	43734	0.0111053	0.0555628	2.28091	TB-EOT	Non significant
P02748	P02748;CON__Q3MHN2	>SP|P02748|CO9_HUMAN Complement component C9 OS=Homo sapiens OX=9606 GN=C9 PE=1 SV=2	C9	17;2	2	622890	2424600	6975400	13246000	10294000	3317800	5234000	15136000	4887700	3703300	0.0496098	0.142416	1.43346	TB-EOT	Non significant
P02749	P02749;CON__P17690	>SP|P02749|APOH_HUMAN Beta-2-glycoprotein 1 OS=Homo sapiens OX=9606 GN=APOH PE=1 SV=3	APOH	9;1	2	544840	1561100	1838000	2675200	2288700	1192600	3074800	3618200	1188700	498990	0.0439028	0.131449	1.57491	TB-EOT	Non significant
P02750	P02750	>SP|P02750|A2GL_HUMAN Leucine-rich alpha-2-glycoprotein OS=Homo sapiens OX=9606 GN=LRG1 PE=1 SV=2	LRG1	12	1	1312600	991160	3550400	4244400	4003000	1293500	2752600	4383100	3145400	1182400	0.00108791	0.0131468	1.87115	TB-EOT	Upregulated
P02751-10	P02751-10;P02751-9;P02751-14;P02751-8;P02751-17;P02751-3;P02751;P02751-6;P02751-13;P02751-11;P02751-7;P02751-15;P02751-5;P02751-12;P02751-4;P02751-16;P02751-2	>SP|P02751-10|FINC_HUMAN Isoform 10 of Fibronectin OS=Homo sapiens OX=9606 GN=FN1;>SP|P02751-9|FINC_HUMAN Isoform 9 of Fibronectin OS=Homo sapiens OX=9606 GN=FN1;>SP|P02751-14|FINC_HUMAN Isoform 14 of Fibronectin OS=Homo sapiens OX=9606 GN=FN1;>SP|P02751-8|FIN	FN1	47;47;47;47;47;47;47;46;46;46;46;46;45;43;39;10;9	17	5310200	2393700	4883800	8901500	10227000	1999800	2751000	4837000	4306400	2440200	0.00245808	0.0212684	1.85843	TB-EOT	Upregulated
P02753	P02753	>SP|P02753|RET4_HUMAN Retinol-binding protein 4 OS=Homo sapiens OX=9606 GN=RBP4 PE=1 SV=3	RBP4	7	1	69126	118070	255130	730670	137640	111950	76395	196240	358540	156300	0.0543122	0.151855	1.12846	TB-EOT	Non significant
P02760	P02760;CON__P00978	>SP|P02760|AMBP_HUMAN Protein AMBP OS=Homo sapiens OX=9606 GN=AMBP PE=1 SV=1	AMBP	10;1	2	2760500	2477700	3633100	5692600	6041900	1772700	4312900	7096000	5002900	1264200	0.00193854	0.0190553	2.07833	TB-EOT	Upregulated
P02763	P02763	>SP|P02763|A1AG1_HUMAN Alpha-1-acid glycoprotein 1 OS=Homo sapiens OX=9606 GN=ORM1 PE=1 SV=1	ORM1	5	1	194340000	10508000	41582000	104280000	198730000	17541000	42802000	104180000	49660000	21376000	0.000154374	0.00489173	3.14321	TB-EOT	Upregulated
P02765	P02765;CON__P12763	>SP|P02765|FETUA_HUMAN Alpha-2-HS-glycoprotein OS=Homo sapiens OX=9606 GN=AHSG PE=1 SV=2	AHSG	10;3	2	5447200	2326100	3666500	15665000	3657900	4134200	1580400	4495200	8561600	2297000	0.00958947	0.0516767	1.64119	TB-EOT	Non significant
P02766	P02766	>SP|P02766|TTHY_HUMAN Transthyretin OS=Homo sapiens OX=9606 GN=TTR PE=1 SV=1	TTR	4	1	707520	572490	1968100	4012800	518540	891170	1106900	1327800	1219600	609980	0.0498128	0.142416	1.26749	TB-EOT	Non significant
P02774	P02774;P02774-3;P02774-2;CON__Q3MHN5;CON__ENSEMBL:ENSBTAP00000018229;Q8TDJ6-2;Q8TDJ6;Q8TDJ6-3	>SP|P02774|VTDB_HUMAN Vitamin D-binding protein OS=Homo sapiens OX=9606 GN=GC PE=1 SV=2;>SP|P02774-3|VTDB_HUMAN Isoform 3 of Vitamin D-binding protein OS=Homo sapiens OX=9606 GN=GC;>SP|P02774-2|VTDB_HUMAN Isoform 2 of Vitamin D-binding protein OS=Homo sapiens	GC	29;29;21;6;6;1;1;1	8	31518000	27495000	37535000	84301000	47652000	18995000	29916000	49431000	50668000	16465000	0.00350196	0.0261102	1.80618	TB-EOT	Upregulated
P02786	P02786;Q9UP52-2;Q9UP52-3;Q9UP52	>SP|P02786|TFR1_HUMAN Transferrin receptor protein 1 OS=Homo sapiens OX=9606 GN=TFRC PE=1 SV=2	TFRC	15;1;1;1	4	149310	649220	1415400	1185100	750360	2173900	182750	335100	340110	2083100	0.0178956	0.0747781	-1.07328	TB-EOT	Non significant
P02787	P02787;CON__Q2HJF0	>SP|P02787|TRFE_HUMAN Serotransferrin OS=Homo sapiens OX=9606 GN=TF PE=1 SV=3	TF	47;1	2	34388000	93840000	168050000	431370000	249980000	147820000	103910000	142020000	157650000	151640000	0.061614	0.166635	0.920077	TB-EOT	Non significant
P02788	P02788;P02788-2	>SP|P02788|TRFL_HUMAN Lactotransferrin OS=Homo sapiens OX=9606 GN=LTF PE=1 SV=6;>SP|P02788-2|TRFL_HUMAN Isoform DeltaLf of Lactotransferrin OS=Homo sapiens OX=9606 GN=LTF	LTF	46;45	2	10612000	1526200	41021000	2467600	49250000	6262600	2151000	4849600	28951000	6991100	0.228651	0.385464	1.09742	TB-EOT	Non significant
P02790	P02790	>SP|P02790|HEMO_HUMAN Hemopexin OS=Homo sapiens OX=9606 GN=HPX PE=1 SV=2	HPX	18	1	42171000	32150000	36652000	65596000	40133000	19080000	44320000	62515000	43448000	16844000	0.00704128	0.0423312	1.83094	TB-EOT	Upregulated
P02792	P02792	>SP|P02792|FRIL_HUMAN Ferritin light chain OS=Homo sapiens OX=9606 GN=FTL PE=1 SV=2	FTL	7	1	1488100	3505200	2619700	1714000	952850	3672800	155710	610580	287780	6022700	0.0337651	0.109796	-1.71097	TB-EOT	Non significant
P02794	P02794	>SP|P02794|FRIH_HUMAN Ferritin heavy chain OS=Homo sapiens OX=9606 GN=FTH1 PE=1 SV=2	FTH1	7	1	1326800	2484400	2332500	1142500	1385000	6500300	316700	598920	616110	6722600	0.0142623	0.0657361	-1.47658	TB-EOT	Non significant
P02810	P02810	>SP|P02810|PRPC_HUMAN Salivary acidic proline-rich phosphoprotein 1/2 OS=Homo sapiens OX=9606 GN=PRH1 PE=1 SV=2	PRH1	3	1	389470	21359	161060	356690	58699	35254	36638	136890	1296800	29720	0.00501005	0.0334223	3.01069	TB-EOT	Upregulated
P03952	P03952	>SP|P03952|KLKB1_HUMAN Plasma kallikrein OS=Homo sapiens OX=9606 GN=KLKB1 PE=1 SV=1	KLKB1	6	1	83050	146930	262800	275680	516670	142390	215750	551030	211450	151580	0.0145308	0.0660334	1.46194	TB-EOT	Non significant
P03973	P03973	>SP|P03973|SLPI_HUMAN Antileukoproteinase OS=Homo sapiens OX=9606 GN=SLPI PE=1 SV=2	SLPI	7	1	523990	343700	1613300	263500	1690900	828510	220330	183660	2523800	635160	0.548881	0.678187	0.403212	TB-EOT	Non significant
P04003	P04003;CON__Q28065	>SP|P04003|C4BPA_HUMAN C4b-binding protein alpha chain OS=Homo sapiens OX=9606 GN=C4BPA PE=1 SV=2	C4BPA	11;1	2	476030	1025800	1094200	1109300	3222300	795320	1327500	5416600	723880	641100	0.0438741	0.131449	1.5831	TB-EOT	Non significant
P04004	P04004;CON__Q3ZBS7	>SP|P04004|VTNC_HUMAN Vitronectin OS=Homo sapiens OX=9606 GN=VTN PE=1 SV=1	VTN	8;1	2	1015500	2474600	1879400	4556200	2085400	1078800	1323300	3631300	2618700	1764300	0.0453487	0.134455	1.22482	TB-EOT	Non significant
P04040	P04040	>SP|P04040|CATA_HUMAN Catalase OS=Homo sapiens OX=9606 GN=CAT PE=1 SV=3	CAT	16	1	857130	528480	4099400	4569800	4097400	1374200	550000	1475300	1060100	2644500	0.159583	0.3057	0.744306	TB-EOT	Non significant
P04066	P04066	>SP|P04066|FUCO_HUMAN Tissue alpha-L-fucosidase OS=Homo sapiens OX=9606 GN=FUCA1 PE=1 SV=4	FUCA1	9	1	208050	578430	2492300	1437200	1126000	2989400	291260	531100	866100	3699900	0.0187703	0.0769532	-0.886494	TB-EOT	Non significant
P04075	P04075;P04075-2;P05062	>SP|P04075|ALDOA_HUMAN Fructose-bisphosphate aldolase A OS=Homo sapiens OX=9606 GN=ALDOA PE=1 SV=2;>SP|P04075-2|ALDOA_HUMAN Isoform 2 of Fructose-bisphosphate aldolase A OS=Homo sapiens OX=9606 GN=ALDOA	ALDOA	15;14;0	3	790220	1817300	9954600	1912100	5065900	5926000	1239600	1440300	3441500	4801600	0.219617	0.374901	-0.468656	TB-EOT	Non significant
P04080	P04080	>SP|P04080|CYTB_HUMAN Cystatin-B OS=Homo sapiens OX=9606 GN=CSTB PE=1 SV=2	CSTB	4	1	1488400	488030	3389800	1090700	1234800	3914700	434920	571370	978110	5961000	0.190911	0.344455	-0.633215	TB-EOT	Non significant
P04083	P04083	>SP|P04083|ANXA1_HUMAN Annexin A1 OS=Homo sapiens OX=9606 GN=ANXA1 PE=1 SV=2	ANXA1	21	1	4125200	1865800	9355600	4992500	6686400	11125000	3947800	3704700	4115900	12325000	0.523215	0.657152	0.220639	TB-EOT	Non significant
P04114	P04114	>SP|P04114|APOB_HUMAN Apolipoprotein B-100 OS=Homo sapiens OX=9606 GN=APOB PE=1 SV=2	APOB	26	1	122210	509700	1789700	1083600	1175500	289420	514300	837690	862940	400110	0.138765	0.277043	0.982901	TB-EOT	Non significant
P04179-4	P04179-4;P04179;P04179-2;P04179-3	>SP|P04179-4|SODM_HUMAN Isoform 4 of Superoxide dismutase [Mn], mitochondrial OS=Homo sapiens OX=9606 GN=SOD2;>SP|P04179|SODM_HUMAN Superoxide dismutase [Mn], mitochondrial OS=Homo sapiens OX=9606 GN=SOD2 PE=1 SV=3;>SP|P04179-2|SODM_HUMAN Isoform 2 of Superox	SOD2	7;7;6;4	4	702850	128160	287910	283880	648960	588440	362000	189140	280770	560860	0.0824459	0.198874	1.00556	TB-EOT	Non significant
P04180	P04180	>SP|P04180|LCAT_HUMAN Phosphatidylcholine-sterol acyltransferase OS=Homo sapiens OX=9606 GN=LCAT PE=1 SV=1	LCAT	4	1	50633	47792	62205	144820	137770	41211	117530	141290	86397	37022	0.00115583	0.0136281	2.06221	TB-EOT	Upregulated
P04196	P04196	>SP|P04196|HRG_HUMAN Histidine-rich glycoprotein OS=Homo sapiens OX=9606 GN=HRG PE=1 SV=1	HRG	13	1	8140100	7046800	14035000	16604000	9128700	4873200	2127000	5424900	1846000	3703300	0.43722	0.582322	0.6039	TB-EOT	Non significant
P04217	P04217;CON__Q2KJF1	>SP|P04217|A1BG_HUMAN Alpha-1B-glycoprotein OS=Homo sapiens OX=9606 GN=A1BG PE=1 SV=4	A1BG	4;0	2	3825800	8786300	10461000	20065000	9427000	3944200	13132000	14764000	12072000	5018600	0.0187329	0.0769532	1.59867	TB-EOT	Non significant
P04217-2	P04217-2	>SP|P04217-2|A1BG_HUMAN Isoform 2 of Alpha-1B-glycoprotein OS=Homo sapiens OX=9606 GN=A1BG	A1BG	2	1	7704.6	95428	69668	194460	58031	40818	168430	131690	43765	53027	0.278507	0.443106	0.962127	TB-EOT	Non significant
P04275	P04275	>SP|P04275|VWF_HUMAN von Willebrand factor OS=Homo sapiens OX=9606 GN=VWF PE=1 SV=4	VWF	3	1	18960	12702	24371	138080	43888	14723	38326	73383	57263	14743	0.000138148	0.00479297	2.53286	TB-EOT	Upregulated
P04278	P04278;P04278-4;P04278-2;P04278-3;P04278-5	>SP|P04278|SHBG_HUMAN Sex hormone-binding globulin OS=Homo sapiens OX=9606 GN=SHBG PE=1 SV=2;>SP|P04278-4|SHBG_HUMAN Isoform 4 of Sex hormone-binding globulin OS=Homo sapiens OX=9606 GN=SHBG;>SP|P04278-2|SHBG_HUMAN Isoform 2 of Sex hormone-binding globulin OS	SHBG	6;5;5;5;5	5	38624	80417	243470	382910	330580	139550	143110	301590	246470	119160	0.0112886	0.0557466	1.38171	TB-EOT	Non significant
P04406	P04406;P04406-2;O14556	>SP|P04406|G3P_HUMAN Glyceraldehyde-3-phosphate dehydrogenase OS=Homo sapiens OX=9606 GN=GAPDH PE=1 SV=3;>SP|P04406-2|G3P_HUMAN Isoform 2 of Glyceraldehyde-3-phosphate dehydrogenase OS=Homo sapiens OX=9606 GN=GAPDH	GAPDH	16;14;1	3	588360	799690	4507300	1552900	3570000	1581900	563190	1141700	4461800	2553500	0.341457	0.500844	0.429062	TB-EOT	Non significant
P04424	P04424;P04424-3;P04424-2	>SP|P04424|ARLY_HUMAN Argininosuccinate lyase OS=Homo sapiens OX=9606 GN=ASL PE=1 SV=4;>SP|P04424-3|ARLY_HUMAN Isoform 3 of Argininosuccinate lyase OS=Homo sapiens OX=9606 GN=ASL;>SP|P04424-2|ARLY_HUMAN Isoform 2 of Argininosuccinate lyase OS=Homo sapiens OX=	ASL	10;9;9	3	102330	388780	1123800	690040	502950	2125800	475490	559470	514420	1768500	0.143346	0.28322	-0.602443	TB-EOT	Non significant
P04632	P04632;Q96L46	>SP|P04632|CPNS1_HUMAN Calpain small subunit 1 OS=Homo sapiens OX=9606 GN=CAPNS1 PE=1 SV=1	CAPNS1	4;1	2	136270	75631	428220	324900	265420	409140	101400	219130	353370	409990	0.0879344	0.205621	0.504411	TB-EOT	Non significant
P04745	P04745;P19961;P04746;P19961-2;P04746-2	>SP|P04745|AMY1_HUMAN Alpha-amylase 1 OS=Homo sapiens OX=9606 GN=AMY1A PE=1 SV=2;>SP|P19961|AMY2B_HUMAN Alpha-amylase 2B OS=Homo sapiens OX=9606 GN=AMY2B PE=1 SV=1;>SP|P04746|AMYP_HUMAN Pancreatic alpha-amylase OS=Homo sapiens OX=9606 GN=AMY2A PE=1 SV=2;>SP|P1	AMY1A;AMY2B;AMY2A	18;13;12;8;5	5	13178000	1155900	2144100	20104000	5795100	2197400	987800	16343000	99659000	2241500	0.00134341	0.0151357	3.49429	TB-EOT	Upregulated
P04792	P04792	>SP|P04792|HSPB1_HUMAN Heat shock protein beta-1 OS=Homo sapiens OX=9606 GN=HSPB1 PE=1 SV=2	HSPB1	7	1	295010	914690	3270000	1194100	842920	1882400	761230	1132000	1218000	3465000	0.162946	0.31019	-0.494502	TB-EOT	Non significant
P04839	P04839	>SP|P04839|CY24B_HUMAN Cytochrome b-245 heavy chain OS=Homo sapiens OX=9606 GN=CYBB PE=1 SV=2	CYBB	6	1	116900	142380	354720	158410	357020	730560	72191	138960	161620	1034500	0.0700951	0.180397	-0.716375	TB-EOT	Non significant
P04899	P04899;P04899-4;P04899-6;P04899-3;P04899-5;P04899-2;P63096;P09471-2;P63096-2;P11488;P19087;P09471;A8MTJ3;P38405;P38405-2	>SP|P04899|GNAI2_HUMAN Guanine nucleotide-binding protein G(i) subunit alpha-2 OS=Homo sapiens OX=9606 GN=GNAI2 PE=1 SV=3;>SP|P04899-4|GNAI2_HUMAN Isoform sGi2 of Guanine nucleotide-binding protein G(i) subunit alpha-2 OS=Homo sapiens OX=9606 GN=GNAI2;>SP|P04	GNAI2	7;7;7;7;7;7;0;0;0;0;0;0;0;0;0	15	258460	400400	1377300	670280	1215300	2456400	395180	451900	797500	2491500	0.169381	0.31731	-0.424654	TB-EOT	Non significant
P05023-3	P05023-3;P05023-4;P05023;P05023-2;P13637;P13637-2;P13637-3;P50993;P20648	>SP|P05023-3|AT1A1_HUMAN Isoform 3 of Sodium/potassium-transporting ATPase subunit alpha-1 OS=Homo sapiens OX=9606 GN=ATP1A1;>SP|P05023-4|AT1A1_HUMAN Isoform 4 of Sodium/potassium-transporting ATPase subunit alpha-1 OS=Homo sapiens OX=9606 GN=ATP1A1;>SP|P0502	ATP1A1	9;9;9;7;4;4;4;3;1	9	96965	169330	577360	281090	317090	553320	246010	336370	394970	568570	0.62824	0.739593	0.148151	TB-EOT	Non significant
P05067-7	P05067-7;P05067-11;P05067-8;P05067-9;P05067;P05067-10;P05067-3;P05067-4;P05067-5;P05067-6	>SP|P05067-7|A4_HUMAN Isoform L-APP733 of Amyloid-beta A4 protein OS=Homo sapiens OX=9606 GN=APP;>SP|P05067-11|A4_HUMAN Isoform 11 of Amyloid-beta A4 protein OS=Homo sapiens OX=9606 GN=APP;>SP|P05067-8|A4_HUMAN Isoform APP751 of Amyloid-beta A4 protein OS=Hom	APP	3;3;3;3;3;1;1;1;1;1	10	41354	12931	39807	37427	33033	36094	12728	25259	91687	24933	0.0148093	0.0666419	1.23352	TB-EOT	Non significant
P05089	P05089;P05089-2;P05089-3	>SP|P05089|ARGI1_HUMAN Arginase-1 OS=Homo sapiens OX=9606 GN=ARG1 PE=1 SV=2;>SP|P05089-2|ARGI1_HUMAN Isoform 2 of Arginase-1 OS=Homo sapiens OX=9606 GN=ARG1;>SP|P05089-3|ARGI1_HUMAN Isoform 3 of Arginase-1 OS=Homo sapiens OX=9606 GN=ARG1	ARG1	4;4;2	3	281440	69774	626490	125890	2096200	115630	278790	232360	338170	131430	0.0185846	0.0769231	1.95238	TB-EOT	Non significant
P05090	P05090	>SP|P05090|APOD_HUMAN Apolipoprotein D OS=Homo sapiens OX=9606 GN=APOD PE=1 SV=1	APOD	6	1	925990	1122300	1591200	2105900	2619400	1019700	1355800	2310800	2869800	1090400	0.00266309	0.0219984	1.53016	TB-EOT	Upregulated
P05091	P05091;P05091-2;O33340;P47895;P30837	>SP|P05091|ALDH2_HUMAN Aldehyde dehydrogenase, mitochondrial OS=Homo sapiens OX=9606 GN=ALDH2 PE=1 SV=2;>SP|P05091-2|ALDH2_HUMAN Isoform 2 of Aldehyde dehydrogenase, mitochondrial OS=Homo sapiens OX=9606 GN=ALDH2	ALDH2	12;10;0;0;0	5	568220	534850	1580700	1336600	823080	1603600	616110	530490	443050	5790300	0.321289	0.486354	-0.463436	TB-EOT	Non significant
P05107	P05107	>SP|P05107|ITB2_HUMAN Integrin beta-2 OS=Homo sapiens OX=9606 GN=ITGB2 PE=1 SV=2	ITGB2	22	1	1047000	461010	1759900	595560	3408300	2756300	490800	916560	1573300	3549500	0.654355	0.759172	0.208324	TB-EOT	Non significant
P05109	P05109	>SP|P05109|S10A8_HUMAN Protein S100-A8 OS=Homo sapiens OX=9606 GN=S100A8 PE=1 SV=1	S100A8	8	1	130520000	2445400	28425000	2880200	114040000	5170700	21573000	12053000	48701000	5250500	0.0164643	0.0712603	2.97286	TB-EOT	Non significant
P05114	P05114	>SP|P05114|HMGN1_HUMAN Non-histone chromosomal protein HMG-14 OS=Homo sapiens OX=9606 GN=HMGN1 PE=1 SV=3	HMGN1	2	1	167100	18658	129240	22103	62038	16967	22454	16825	104580	24984	0.120088	0.254038	1.37916	TB-EOT	Non significant
P05120	P05120	>SP|P05120|PAI2_HUMAN Plasminogen activator inhibitor 2 OS=Homo sapiens OX=9606 GN=SERPINB2 PE=1 SV=2	SERPINB2	3	1	6918	6725.5	38955	24941	19807	27048	14562	28848	42575	21787	0.029631	0.103606	0.859159	TB-EOT	Non significant
P05155	P05155;P05155-3;P05155-2;CON__P50448	>SP|P05155|IC1_HUMAN Plasma protease C1 inhibitor OS=Homo sapiens OX=9606 GN=SERPING1 PE=1 SV=2;>SP|P05155-3|IC1_HUMAN Isoform 3 of Plasma protease C1 inhibitor OS=Homo sapiens OX=9606 GN=SERPING1;>SP|P05155-2|IC1_HUMAN Isoform 2 of Plasma protease C1 inhibit	SERPING1	15;15;14;2	4	5597400	4204100	9023100	21845000	19578000	7089800	10148000	15726000	9603800	4888600	0.000605203	0.00982796	1.90169	TB-EOT	Upregulated
P05156	P05156;CON__Q32PI4	>SP|P05156|CFAI_HUMAN Complement factor I OS=Homo sapiens OX=9606 GN=CFI PE=1 SV=2	CFI	18;2	2	1022300	2595700	2585200	4687700	3300600	1939500	3129700	4403400	3114500	1644500	0.0257606	0.0944141	1.32026	TB-EOT	Non significant
P05160	P05160	>SP|P05160|F13B_HUMAN Coagulation factor XIII B chain OS=Homo sapiens OX=9606 GN=F13B PE=1 SV=3	F13B	9	1	168560	150470	228080	358370	410010	84744	491710	769920	367820	93717	0.00130756	0.0148418	2.45435	TB-EOT	Upregulated
P05164-2	P05164-2;P05164;P05164-3	>SP|P05164-2|PERM_HUMAN Isoform H14 of Myeloperoxidase OS=Homo sapiens OX=9606 GN=MPO;>SP|P05164|PERM_HUMAN Myeloperoxidase OS=Homo sapiens OX=9606 GN=MPO PE=1 SV=1;>SP|P05164-3|PERM_HUMAN Isoform H7 of Myeloperoxidase OS=Homo sapiens OX=9606 GN=MPO	MPO	21;21;21	3	3998200	122560	1919300	140240	17438000	665270	684060	2636700	3613700	851420	0.0332097	0.109582	2.5833	TB-EOT	Non significant
P05186	P05186;P05186-2;P05186-3	>SP|P05186|PPBT_HUMAN Alkaline phosphatase, tissue-nonspecific isozyme OS=Homo sapiens OX=9606 GN=ALPL PE=1 SV=4;>SP|P05186-2|PPBT_HUMAN Isoform 2 of Alkaline phosphatase, tissue-nonspecific isozyme OS=Homo sapiens OX=9606 GN=ALPL;>SP|P05186-3|PPBT_HUMAN Isof	ALPL	11;9;9	3	333080	595990	1414700	1920100	1113300	4199400	372320	497990	1841200	1749600	0.73219	0.822497	-0.140517	TB-EOT	Non significant
P05198	P05198	>SP|P05198|IF2A_HUMAN Eukaryotic translation initiation factor 2 subunit 1 OS=Homo sapiens OX=9606 GN=EIF2S1 PE=1 SV=3	EIF2S1	6	1	68190	51239	365100	109950	168690	271420	63685	90790	172170	341630	0.688711	0.787617	-0.116409	TB-EOT	Non significant
P05204	P05204	>SP|P05204|HMGN2_HUMAN Non-histone chromosomal protein HMG-17 OS=Homo sapiens OX=9606 GN=HMGN2 PE=1 SV=3	HMGN2	2	1	617410	4447.8	25105	5043.6	27034	23991	2445.7	2713.3	8597.4	27348	0.716416	0.80836	0.516391	TB-EOT	Non significant
P05362	P05362	>SP|P05362|ICAM1_HUMAN Intercellular adhesion molecule 1 OS=Homo sapiens OX=9606 GN=ICAM1 PE=1 SV=2	ICAM1	14	1	1145100	1703300	1980600	9451000	2994400	8205000	229220	1044000	1398800	3430400	0.768668	0.846592	-0.211721	TB-EOT	Non significant
P05387	P05387;P05386-2;P05386	>SP|P05387|RLA2_HUMAN 60S acidic ribosomal protein P2 OS=Homo sapiens OX=9606 GN=RPLP2 PE=1 SV=1	RPLP2	3;1;1	3	38456	15046	239670	120730	72142	260490	11902	31451	218570	202990	0.691334	0.789809	-0.240351	TB-EOT	Non significant
P05388	P05388;P05388-2;Q8NHW5	>SP|P05388|RLA0_HUMAN 60S acidic ribosomal protein P0 OS=Homo sapiens OX=9606 GN=RPLP0 PE=1 SV=1;>SP|P05388-2|RLA0_HUMAN Isoform 2 of 60S acidic ribosomal protein P0 OS=Homo sapiens OX=9606 GN=RPLP0;>SP|Q8NHW5|RLA0L_HUMAN 60S acidic ribosomal protein P0-like	RPLP0;RPLP0P6	7;6;5	3	18137	129860	459870	83320	87304	219780	30909	49055	190490	467520	0.00324382	0.0246926	-1.41311	TB-EOT	Downregulated
P05413	P05413	>SP|P05413|FABPH_HUMAN Fatty acid-binding protein, heart OS=Homo sapiens OX=9606 GN=FABP3 PE=1 SV=4	FABP3	5	1	361410	266200	2315000	639100	675970	2508900	121820	303090	234570	7619700	0.0113353	0.055796	-1.62065	TB-EOT	Non significant
P05455	P05455	>SP|P05455|LA_HUMAN Lupus La protein OS=Homo sapiens OX=9606 GN=SSB PE=1 SV=2	SSB	14	1	240860	996010	3490400	1050500	528000	2798600	1569000	763690	1289700	3216800	0.123162	0.259099	-0.763994	TB-EOT	Non significant
P05543	P05543;CON__Q9TT36	>SP|P05543|THBG_HUMAN Thyroxine-binding globulin OS=Homo sapiens OX=9606 GN=SERPINA7 PE=1 SV=2	SERPINA7	13;4	2	1287100	936830	3142000	4884300	2858600	1765800	1768300	3388100	2483900	1425900	0.00223811	0.0207571	1.47875	TB-EOT	Upregulated
P05546	P05546;CON__ENSEMBL:ENSBTAP00000018574	>SP|P05546|HEP2_HUMAN Heparin cofactor 2 OS=Homo sapiens OX=9606 GN=SERPIND1 PE=1 SV=3	SERPIND1	13;2	2	162310	946130	1549300	2876000	2201400	825510	2013600	3977000	952680	834530	0.088348	0.205621	1.34895	TB-EOT	Non significant
P05556	P05556;P05556-2;P05556-5;P05556-4;P05556-3	>SP|P05556|ITB1_HUMAN Integrin beta-1 OS=Homo sapiens OX=9606 GN=ITGB1 PE=1 SV=2;>SP|P05556-2|ITB1_HUMAN Isoform 2 of Integrin beta-1 OS=Homo sapiens OX=9606 GN=ITGB1;>SP|P05556-5|ITB1_HUMAN Isoform 5 of Integrin beta-1 OS=Homo sapiens OX=9606 GN=ITGB1;>SP|P05	ITGB1	4;3;3;3;3	5	39468	41457	137020	131960	123340	272360	170480	170720	105250	234540	0.207822	0.360841	0.555249	TB-EOT	Non significant
P05783	P05783;CON__H-INV:HIT000015463	>SP|P05783|K1C18_HUMAN Keratin, type I cytoskeletal 18 OS=Homo sapiens OX=9606 GN=KRT18 PE=1 SV=2	KRT18	3;1	2	66764	40951	141670	71666	73318	72882	50692	38102	1421800	61261	0.107605	0.237114	1.33558	TB-EOT	Non significant
P06276	P06276	>SP|P06276|CHLE_HUMAN Cholinesterase OS=Homo sapiens OX=9606 GN=BCHE PE=1 SV=1	BCHE	6	1	104340	40654	192550	219190	369490	85351	209510	402470	271630	111610	6.61215e-05	0.00437264	2.22928	TB-EOT	Upregulated
P06280	P06280	>SP|P06280|AGAL_HUMAN Alpha-galactosidase A OS=Homo sapiens OX=9606 GN=GLA PE=1 SV=1	GLA	9	1	167150	236640	319770	461660	335230	465040	95891	168100	256260	1702500	0.463133	0.605176	-0.326067	TB-EOT	Non significant
P06312	P06312	>SP|P06312|KV401_HUMAN Immunoglobulin kappa variable 4-1 OS=Homo sapiens OX=9606 GN=IGKV4-1 PE=1 SV=1	IGKV4-1	5	1	227100	58591	136260	351280	390940	102080	227050	297670	424110	49003	1.77389e-05	0.00374789	2.82242	TB-EOT	Upregulated
P06331	P06331;P0DP08;P0DP06;A0A0C4DH41;P01825;P01824;P0DP07;A0A087WSY4	>SP|P06331|HV434_HUMAN Immunoglobulin heavy variable 4-34 OS=Homo sapiens OX=9606 GN=IGHV4-34 PE=1 SV=2;>SP|P0DP08|HVD82_HUMAN Immunoglobulin heavy variable 4-38-2 OS=Homo sapiens OX=9606 GN=IGHV4-38-2 PE=3 SV=1;>SP|P0DP06|HVD34_HUMAN Immunoglobulin heavy var	IGHV4-61	2;1;1;1;1;1;0;0	8	3051900	956290	3209700	12961000	9777300	4770800	7458900	7439700	10402000	1729500	8.24718e-06	0.00335848	2.65308	TB-EOT	Upregulated
P06454-2	P06454-2;P06454	>SP|P06454-2|PTMA_HUMAN Isoform 2 of Prothymosin alpha OS=Homo sapiens OX=9606 GN=PTMA;>SP|P06454|PTMA_HUMAN Prothymosin alpha OS=Homo sapiens OX=9606 GN=PTMA PE=1 SV=2	PTMA	7;7	2	2225800	740130	2553200	906710	1006900	3895300	1670800	890560	3353600	3462800	0.639844	0.747468	0.246387	TB-EOT	Non significant
P06576	P06576	>SP|P06576|ATPB_HUMAN ATP synthase subunit beta, mitochondrial OS=Homo sapiens OX=9606 GN=ATP5F1B PE=1 SV=3	ATP5B	10	1	220460	119710	614520	392750	410720	450220	174050	210950	241380	1759300	0.890489	0.930068	-0.0559625	TB-EOT	Non significant
P06681	P06681;P06681-3;P06681-2	>SP|P06681|CO2_HUMAN Complement C2 OS=Homo sapiens OX=9606 GN=C2 PE=1 SV=2;>SP|P06681-3|CO2_HUMAN Isoform 3 of Complement C2 OS=Homo sapiens OX=9606 GN=C2;>SP|P06681-2|CO2_HUMAN Isoform 2 of Complement C2 OS=Homo sapiens OX=9606 GN=C2	C2	20;19;16	3	697040	1465400	3898500	7626700	5646800	5508900	1551500	3400100	3029200	3836300	0.159281	0.3057	0.612753	TB-EOT	Non significant
P06702	P06702	>SP|P06702|S10A9_HUMAN Protein S100-A9 OS=Homo sapiens OX=9606 GN=S100A9 PE=1 SV=1	S100A9	7	1	123290000	1957900	34113000	2973300	74704000	5009500	20732000	12845000	46937000	5854100	0.0178929	0.0747781	2.84854	TB-EOT	Non significant
P06703	P06703	>SP|P06703|S10A6_HUMAN Protein S100-A6 OS=Homo sapiens OX=9606 GN=S100A6 PE=1 SV=1	S100A6	3	1	20874000	5948900	9611900	11185000	8331200	10913000	8298000	6439500	15091000	16610000	0.0783419	0.19441	0.95266	TB-EOT	Non significant
P06727	P06727;CON__Q32PJ2	>SP|P06727|APOA4_HUMAN Apolipoprotein A-IV OS=Homo sapiens OX=9606 GN=APOA4 PE=1 SV=3	APOA4	22;1	2	596040	3553500	4277000	13307000	2729700	2107100	3100600	11369000	11732000	2175500	0.0639801	0.169832	1.51478	TB-EOT	Non significant
P06730	P06730;P06730-3;P06730-2	>SP|P06730|IF4E_HUMAN Eukaryotic translation initiation factor 4E OS=Homo sapiens OX=9606 GN=EIF4E PE=1 SV=2;>SP|P06730-3|IF4E_HUMAN Isoform 3 of Eukaryotic translation initiation factor 4E OS=Homo sapiens OX=9606 GN=EIF4E;>SP|P06730-2|IF4E_HUMAN Isoform 2 of	EIF4E	2;2;2	3	1754.9	15154	86165	29912	27164	103310	21104	18221	23383	130980	0.0443721	0.132593	-1.22599	TB-EOT	Non significant
P06731-2	P06731-2;P06731;P13688-3;P13688-4;P13688-11;P13688-9;P13688-2;P13688-6;P13688-5;P13688-8;P13688-10;P13688	>SP|P06731-2|CEAM5_HUMAN Isoform 2 of Carcinoembryonic antigen-related cell adhesion molecule 5 OS=Homo sapiens OX=9606 GN=CEACAM5;>SP|P06731|CEAM5_HUMAN Carcinoembryonic antigen-related cell adhesion molecule 5 OS=Homo sapiens OX=9606 GN=CEACAM5 PE=1 SV=3	CEACAM5	5;5;0;0;0;0;0;0;0;0;0;0	12	507560	39872	506810	193830	363730	420630	108370	74788	1576500	142950	0.0791213	0.195046	1.4294	TB-EOT	Non significant
P06733	P06733;P13929-3;P13929-2;P13929	>SP|P06733|ENOA_HUMAN Alpha-enolase OS=Homo sapiens OX=9606 GN=ENO1 PE=1 SV=2	ENO1	5;0;0;0	4	3069300	6175700	31722000	13799000	17823000	28581000	6783800	9194300	6745300	33027000	0.196078	0.347998	-0.470666	TB-EOT	Non significant
P06737-2	P06737-2;P06737	>SP|P06737-2|PYGL_HUMAN Isoform 2 of Glycogen phosphorylase, liver form OS=Homo sapiens OX=9606 GN=PYGL;>SP|P06737|PYGL_HUMAN Glycogen phosphorylase, liver form OS=Homo sapiens OX=9606 GN=PYGL PE=1 SV=4	PYGL	9;9	2	58554	136520	425930	159680	808790	431110	111330	159630	387120	611350	0.986564	0.991126	-0.00740897	TB-EOT	Non significant
P06744	P06744;P06744-2;CON__Q3ZBD7;Q8N196	>SP|P06744|G6PI_HUMAN Glucose-6-phosphate isomerase OS=Homo sapiens OX=9606 GN=GPI PE=1 SV=4;>SP|P06744-2|G6PI_HUMAN Isoform 2 of Glucose-6-phosphate isomerase OS=Homo sapiens OX=9606 GN=GPI	GPI	19;19;4;1	4	4495600	3512900	18994000	9262400	17904000	11052000	5348100	7114600	6191700	20497000	0.416271	0.563953	0.290128	TB-EOT	Non significant
P06748-2	P06748-2;P06748;P06748-3	>SP|P06748-2|NPM_HUMAN Isoform 2 of Nucleophosmin OS=Homo sapiens OX=9606 GN=NPM1;>SP|P06748|NPM_HUMAN Nucleophosmin OS=Homo sapiens OX=9606 GN=NPM1 PE=1 SV=2;>SP|P06748-3|NPM_HUMAN Isoform 3 of Nucleophosmin OS=Homo sapiens OX=9606 GN=NPM1	NPM1	7;7;6	3	690530	340830	2348000	563620	671480	1421400	433070	396480	5107900	2379300	0.801553	0.8727	0.14403	TB-EOT	Non significant
P06865	P06865;P06865-2	>SP|P06865|HEXA_HUMAN Beta-hexosaminidase subunit alpha OS=Homo sapiens OX=9606 GN=HEXA PE=1 SV=2	HEXA	13;3	2	2345900	1144800	2224700	1909600	2576000	5416000	391500	726820	3593300	10920000	0.53054	0.662076	-0.357928	TB-EOT	Non significant
P06870-2	P06870-2;P06870	>SP|P06870-2|KLK1_HUMAN Isoform 2 of Kallikrein-1 OS=Homo sapiens OX=9606 GN=KLK1;>SP|P06870|KLK1_HUMAN Kallikrein-1 OS=Homo sapiens OX=9606 GN=KLK1 PE=1 SV=2	KLK1	2;2	2	154480	9009.9	21221	47295	27439	19956	13321	15918	223690	35900	0.0160189	0.0703151	2.11588	TB-EOT	Non significant
P07108	P07108;P07108-3;P07108-2;P07108-4;P07108-5	>SP|P07108|ACBP_HUMAN Acyl-CoA-binding protein OS=Homo sapiens OX=9606 GN=DBI PE=1 SV=2;>SP|P07108-3|ACBP_HUMAN Isoform 3 of Acyl-CoA-binding protein OS=Homo sapiens OX=9606 GN=DBI;>SP|P07108-2|ACBP_HUMAN Isoform 2 of Acyl-CoA-binding protein OS=Homo sapiens	DBI	2;2;2;2;2	5	129900	61792	328170	165090	131890	276980	69008	97790	191920	722460	0.656641	0.760663	-0.166131	TB-EOT	Non significant
P07195	P07195	>SP|P07195|LDHB_HUMAN L-lactate dehydrogenase B chain OS=Homo sapiens OX=9606 GN=LDHB PE=1 SV=2	LDHB	12	1	410860	3293800	10455000	2891700	3419800	12154000	2750900	3041500	4144600	11483000	0.0339799	0.109877	-1.01057	TB-EOT	Non significant
P07203	P07203;P07203-2	>SP|P07203|GPX1_HUMAN Glutathione peroxidase 1 OS=Homo sapiens OX=9606 GN=GPX1 PE=1 SV=4	GPX1	5;1	2	34434	104910	478130	159500	208680	323900	106470	161100	154630	693550	0.117494	0.250291	-0.57935	TB-EOT	Non significant
P07225	P07225;CON__P07224	>SP|P07225|PROS_HUMAN Vitamin K-dependent protein S OS=Homo sapiens OX=9606 GN=PROS1 PE=1 SV=1	PROS1	14;2	2	1006100	542240	1022800	3654500	3908900	3358500	1267200	3301600	1476000	2190700	0.00462132	0.0316623	1.42878	TB-EOT	Upregulated
P07237	P07237	>SP|P07237|PDIA1_HUMAN Protein disulfide-isomerase OS=Homo sapiens OX=9606 GN=P4HB PE=1 SV=3	P4HB	26	1	9937800	2368600	14564000	6336400	6154600	8749500	2988000	3998600	33550000	15304000	0.221682	0.377156	0.68819	TB-EOT	Non significant
P07339	P07339	>SP|P07339|CATD_HUMAN Cathepsin D OS=Homo sapiens OX=9606 GN=CTSD PE=1 SV=1	CTSD	15	1	8859100	7752400	13358000	7067700	6255000	27975000	627160	2414100	4690700	81890000	0.0260788	0.0948943	-1.69971	TB-EOT	Non significant
P07355	P07355;P07355-2;A6NMY6	>SP|P07355|ANXA2_HUMAN Annexin A2 OS=Homo sapiens OX=9606 GN=ANXA2 PE=1 SV=2;>SP|P07355-2|ANXA2_HUMAN Isoform 2 of Annexin A2 OS=Homo sapiens OX=9606 GN=ANXA2;>SP|A6NMY6|AXA2L_HUMAN Putative annexin A2-like protein OS=Homo sapiens OX=9606 GN=ANXA2P2 PE=5 SV=2	ANXA2;ANXA2P2	24;23;18	3	16207000	7878400	35225000	18926000	19386000	108920000	20844000	20995000	9696600	112090000	0.391635	0.541525	-0.467538	TB-EOT	Non significant
P07357	P07357	>SP|P07357|CO8A_HUMAN Complement component C8 alpha chain OS=Homo sapiens OX=9606 GN=C8A PE=1 SV=2	C8A	17	1	348600	760780	1433300	3241600	3206800	705000	1026200	4058100	1779900	887830	0.00665125	0.0406287	1.78634	TB-EOT	Upregulated
P07359	P07359	>SP|P07359|GP1BA_HUMAN Platelet glycoprotein Ib alpha chain OS=Homo sapiens OX=9606 GN=GP1BA PE=1 SV=2	GP1BA	2	1	11720	4691.5	17415	21051	27842	16210	24084	28721	18164	12964	0.00039747	0.00785132	1.73428	TB-EOT	Upregulated
P07360	P07360	>SP|P07360|CO8G_HUMAN Complement component C8 gamma chain OS=Homo sapiens OX=9606 GN=C8G PE=1 SV=3	C8G	7	1	175030	366750	463210	1300900	752440	309470	591590	1479400	414000	418970	0.0165841	0.0714119	1.5652	TB-EOT	Non significant
P07384	P07384	>SP|P07384|CAN1_HUMAN Calpain-1 catalytic subunit OS=Homo sapiens OX=9606 GN=CAPN1 PE=1 SV=1	CAPN1	29	1	522790	941700	3923900	1913400	2116600	4445000	1118300	1410400	2095000	4464700	0.408531	0.55734	-0.223989	TB-EOT	Non significant
P07437	P07437;A6NNZ2;CON__ENSEMBL:ENSBTAP00000025008;Q9H4B7	>SP|P07437|TBB5_HUMAN Tubulin beta chain OS=Homo sapiens OX=9606 GN=TUBB PE=1 SV=2	TUBB	4;0;0;0	4	296830	1958500	7753600	2423200	2932100	6098600	765800	2103200	4551300	7179900	0.0775821	0.19313	-0.828508	TB-EOT	Non significant
P07602	P07602;P07602-2;P07602-3	>SP|P07602|SAP_HUMAN Prosaposin OS=Homo sapiens OX=9606 GN=PSAP PE=1 SV=2;>SP|P07602-2|SAP_HUMAN Isoform Sap-mu-6 of Prosaposin OS=Homo sapiens OX=9606 GN=PSAP;>SP|P07602-3|SAP_HUMAN Isoform Sap-mu-9 of Prosaposin OS=Homo sapiens OX=9606 GN=PSAP	PSAP	17;17;17	3	5769000	6194000	6751700	4035000	3311800	18647000	412390	1300400	7134300	32828000	0.0568827	0.157021	-1.43623	TB-EOT	Non significant
P07686	P07686	>SP|P07686|HEXB_HUMAN Beta-hexosaminidase subunit beta OS=Homo sapiens OX=9606 GN=HEXB PE=1 SV=3	HEXB	17	1	1535900	873310	2091400	1961500	2205200	5258700	372550	781340	2665400	12993000	0.362255	0.520301	-0.489199	TB-EOT	Non significant
P07711	P07711;Q5NE16;P43235;O60911	>SP|P07711|CATL1_HUMAN Cathepsin L1 OS=Homo sapiens OX=9606 GN=CTSL PE=1 SV=2	CTSL	3;1;1;1	4	153070	181700	228450	251920	177260	449920	20151	51204	234640	978420	0.156851	0.303627	-0.899923	TB-EOT	Non significant
P07737	P07737;CON__P02584	>SP|P07737|PROF1_HUMAN Profilin-1 OS=Homo sapiens OX=9606 GN=PFN1 PE=1 SV=2	PFN1	7;3	2	2416200	2894800	16334000	6861600	9969800	16038000	4195500	3343400	6201200	26253000	0.212384	0.36667	-0.411003	TB-EOT	Non significant
P07738	P07738	>SP|P07738|PMGE_HUMAN Bisphosphoglycerate mutase OS=Homo sapiens OX=9606 GN=BPGM PE=1 SV=2	BPGM	5	1	27287	61900	205930	188660	68471	97051	308380	219780	89930	95515	0.161697	0.308584	0.981032	TB-EOT	Non significant
P07741-2	P07741-2;P07741	>SP|P07741-2|APT_HUMAN Isoform 2 of Adenine phosphoribosyltransferase OS=Homo sapiens OX=9606 GN=APRT;>SP|P07741|APT_HUMAN Adenine phosphoribosyltransferase OS=Homo sapiens OX=9606 GN=APRT PE=1 SV=2	APRT	3;3	2	21289	163150	386360	211610	155710	467170	145520	149040	199240	199760	0.498613	0.634105	-0.345598	TB-EOT	Non significant
P07814	P07814	>SP|P07814|SYEP_HUMAN Bifunctional glutamate/proline--tRNA ligase OS=Homo sapiens OX=9606 GN=EPRS PE=1 SV=5	EPRS	3	1	11565	66511	203150	92136	79752	185960	49840	58187	123430	242870	0.116626	0.249843	-0.634816	TB-EOT	Non significant
P07858	P07858	>SP|P07858|CATB_HUMAN Cathepsin B OS=Homo sapiens OX=9606 GN=CTSB PE=1 SV=3	CTSB	8	1	4009300	1599400	2187000	1797900	2896600	3937500	575620	751150	4110200	10301000	0.921521	0.95026	-0.0608405	TB-EOT	Non significant
P07900	P07900;P07900-2;Q58FG0	>SP|P07900|HS90A_HUMAN Heat shock protein HSP 90-alpha OS=Homo sapiens OX=9606 GN=HSP90AA1 PE=1 SV=5;>SP|P07900-2|HS90A_HUMAN Isoform 2 of Heat shock protein HSP 90-alpha OS=Homo sapiens OX=9606 GN=HSP90AA1	HSP90AA1	22;22;2	3	2669000	8607900	51739000	19564000	17072000	62489000	12627000	15017000	15177000	57698000	0.0797159	0.195877	-0.747898	TB-EOT	Non significant
P07910-2	P07910-2;P07910;P07910-3;P07910-4;P0DMR1;O60812;B7ZW38;B2RXH8;Q86SE5;Q86SE5-3	>SP|P07910-2|HNRPC_HUMAN Isoform C1 of Heterogeneous nuclear ribonucleoproteins C1/C2 OS=Homo sapiens OX=9606 GN=HNRNPC;>SP|P07910|HNRPC_HUMAN Heterogeneous nuclear ribonucleoproteins C1/C2 OS=Homo sapiens OX=9606 GN=HNRNPC PE=1 SV=4;>SP|P07910-3|HNRPC_HUMAN	HNRNPC;HNRNPCL4;HNRNPCL1;HNRNPCL3;HNRNPCL2	7;7;5;5;4;4;4;4;1;1	10	1801200	877830	2814400	991220	1345400	1631600	966740	677870	5534700	2601800	0.322723	0.486354	0.530196	TB-EOT	Non significant
P07948-2	P07948-2;P07948;P08631-3;P08631-2;P08631-4;P08631;P06241-3;P06241-2;P06241;P07947	>SP|P07948-2|LYN_HUMAN Isoform 2 of Tyrosine-protein kinase Lyn OS=Homo sapiens OX=9606 GN=LYN;>SP|P07948|LYN_HUMAN Tyrosine-protein kinase Lyn OS=Homo sapiens OX=9606 GN=LYN PE=1 SV=3	LYN	5;5;1;1;1;1;0;0;0;0	10	68052	113100	529640	322290	452960	687700	130030	178560	279300	738130	0.522861	0.657152	-0.203133	TB-EOT	Non significant
P07988	P07988	>SP|P07988|PSPB_HUMAN Pulmonary surfactant-associated protein B OS=Homo sapiens OX=9606 GN=SFTPB PE=1 SV=3	SFTPB	15	1	1499700	3181200	4775300	11385000	8931500	8957700	540920	2122200	9182100	8722300	0.894367	0.931785	0.0791815	TB-EOT	Non significant
P07998	P07998	>SP|P07998|RNAS1_HUMAN Ribonuclease pancreatic OS=Homo sapiens OX=9606 GN=RNASE1 PE=1 SV=4	RNASE1	2	1	34410	58247	323490	103990	70769	150360	73872	96177	119150	111340	0.85468	0.904012	0.0726999	TB-EOT	Non significant
P08133-2	P08133-2;P08133	>SP|P08133-2|ANXA6_HUMAN Isoform 2 of Annexin A6 OS=Homo sapiens OX=9606 GN=ANXA6;>SP|P08133|ANXA6_HUMAN Annexin A6 OS=Homo sapiens OX=9606 GN=ANXA6 PE=1 SV=3	ANXA6	32;32	2	6016700	564950	3122100	2572200	11722000	6602400	3208600	6128100	1707300	7290400	0.0540199	0.151452	1.35079	TB-EOT	Non significant
P08174-4	P08174-4;P08174;P08174-3;P08174-5;P08174-2;P08174-6;P08174-7	>SP|P08174-4|DAF_HUMAN Isoform 4 of Complement decay-accelerating factor OS=Homo sapiens OX=9606 GN=CD55;>SP|P08174|DAF_HUMAN Complement decay-accelerating factor OS=Homo sapiens OX=9606 GN=CD55 PE=1 SV=4;>SP|P08174-3|DAF_HUMAN Isoform 3 of Complement decay-a	CD55	12;12;12;12;12;12;12	7	1963800	2348400	1945800	5784100	1881000	5844600	462580	1107700	2709700	3251500	0.913287	0.94433	0.0624027	TB-EOT	Non significant
P08185	P08185	>SP|P08185|CBG_HUMAN Corticosteroid-binding globulin OS=Homo sapiens OX=9606 GN=SERPINA6 PE=1 SV=1	SERPINA6	7	1	1123100	406040	1773500	3432500	3092300	935710	1442600	2553300	1799500	959220	6.09706e-05	0.00421529	2.06543	TB-EOT	Upregulated
P08195-2	P08195-2;P08195-3;P08195;P08195-4	>SP|P08195-2|4F2_HUMAN Isoform 2 of 4F2 cell-surface antigen heavy chain OS=Homo sapiens OX=9606 GN=SLC3A2;>SP|P08195-3|4F2_HUMAN Isoform 3 of 4F2 cell-surface antigen heavy chain OS=Homo sapiens OX=9606 GN=SLC3A2;>SP|P08195|4F2_HUMAN 4F2 cell-surface antigen	SLC3A2	6;6;6;6	4	27658	68964	143600	153230	119650	310520	38568	59125	54415	371980	0.0850629	0.202758	-0.686678	TB-EOT	Non significant
P08236-2	P08236-2;P08236;P08236-3	>SP|P08236-2|BGLR_HUMAN Isoform 2 of Beta-glucuronidase OS=Homo sapiens OX=9606 GN=GUSB;>SP|P08236|BGLR_HUMAN Beta-glucuronidase OS=Homo sapiens OX=9606 GN=GUSB PE=1 SV=2;>SP|P08236-3|BGLR_HUMAN Isoform 3 of Beta-glucuronidase OS=Homo sapiens OX=9606 GN=GUSB	GUSB	12;12;11	3	443770	384120	746830	414690	436550	1636400	206650	285210	631640	4183600	0.0959649	0.219823	-0.783635	TB-EOT	Non significant
P08238	P08238;Q58FF7;P9WMJ7	>SP|P08238|HS90B_HUMAN Heat shock protein HSP 90-beta OS=Homo sapiens OX=9606 GN=HSP90AB1 PE=1 SV=4	HSP90AB1	20;5;0	3	424470	1819200	14809000	4677800	3832200	13833000	844540	3459300	3394900	16171000	0.0190164	0.0771304	-1.24229	TB-EOT	Non significant
P08246	P08246	>SP|P08246|ELNE_HUMAN Neutrophil elastase OS=Homo sapiens OX=9606 GN=ELANE PE=1 SV=1	ELANE	4	1	1298900	45243	385610	29270	1566400	74893	191900	172200	635550	91006	0.0359683	0.114691	2.50964	TB-EOT	Non significant
P08294	P08294	>SP|P08294|SODE_HUMAN Extracellular superoxide dismutase [Cu-Zn] OS=Homo sapiens OX=9606 GN=SOD3 PE=1 SV=2	SOD3	4	1	47119	98389	218920	392270	101890	270450	143320	189320	553550	167540	0.10984	0.239007	0.839306	TB-EOT	Non significant
P08311	P08311	>SP|P08311|CATG_HUMAN Cathepsin G OS=Homo sapiens OX=9606 GN=CTSG PE=1 SV=2	CTSG	4	1	305100	78095	216740	251890	784820	116790	114110	189950	185950	122470	0.00315697	0.0244911	1.85934	TB-EOT	Upregulated
P08567	P08567	>SP|P08567|PLEK_HUMAN Pleckstrin OS=Homo sapiens OX=9606 GN=PLEK PE=1 SV=3	PLEK	2	1	23238	23061	281470	38234	42962	139250	88551	33772	31921	236610	0.163428	0.310399	-0.766882	TB-EOT	Non significant
P08571	P08571	>SP|P08571|CD14_HUMAN Monocyte differentiation antigen CD14 OS=Homo sapiens OX=9606 GN=CD14 PE=1 SV=2	CD14	6	1	225280	311580	679420	2343100	2414700	708420	480460	1164000	897870	702930	0.00396036	0.0286843	1.5615	TB-EOT	Upregulated
P08575-4	P08575-4;P08575-9;P08575-10;P08575-8;P08575-7;P08575-5;P08575-6;P08575	>SP|P08575-4|PTPRC_HUMAN Isoform 2 of Receptor-type tyrosine-protein phosphatase C OS=Homo sapiens OX=9606 GN=PTPRC;>SP|P08575-9|PTPRC_HUMAN Isoform 7 of Receptor-type tyrosine-protein phosphatase C OS=Homo sapiens OX=9606 GN=PTPRC;>SP|P08575-10|PTPRC_HUMAN I	PTPRC	18;18;18;18;18;18;18;18	8	1106500	387840	973800	669200	1386700	1640400	406400	535220	1054300	2294400	0.36401	0.521886	0.382769	TB-EOT	Non significant
P08603	P08603;P08603-2;Q02985-2;Q02985	>SP|P08603|CFAH_HUMAN Complement factor H OS=Homo sapiens OX=9606 GN=CFH PE=1 SV=4;>SP|P08603-2|CFAH_HUMAN Isoform 2 of Complement factor H OS=Homo sapiens OX=9606 GN=CFH	CFH	30;16;2;2	4	896320	1562600	2237600	1381000	6076400	884520	2457500	4722400	2017100	1005600	0.0200617	0.0784419	1.69145	TB-EOT	Non significant
P08621-4	P08621-4;P08621-2;P08621	>SP|P08621-4|RU17_HUMAN Isoform 4 of U1 small nuclear ribonucleoprotein 70 kDa OS=Homo sapiens OX=9606 GN=SNRNP70;>SP|P08621-2|RU17_HUMAN Isoform 2 of U1 small nuclear ribonucleoprotein 70 kDa OS=Homo sapiens OX=9606 GN=SNRNP70;>SP|P08621|RU17_HUMAN U1 small	SNRNP70	2;2;2	3	1657.8	5911.1	18720	2429.7	3857.2	12728	3190.8	2445.3	9037.7	16349	0.0127156	0.0602695	-1.08249	TB-EOT	Non significant
P08637	P08637;O75015	>SP|P08637|FCG3A_HUMAN Low affinity immunoglobulin gamma Fc region receptor III-A OS=Homo sapiens OX=9606 GN=FCGR3A PE=1 SV=2;>SP|O75015|FCG3B_HUMAN Low affinity immunoglobulin gamma Fc region receptor III-B OS=Homo sapiens OX=9606 GN=FCGR3B PE=1 SV=2	FCGR3A;FCGR3B	5;4	2	2928000	687220	1070800	1439400	2254700	1584100	409280	591190	2376400	1153700	0.062491	0.167931	1.15881	TB-EOT	Non significant
P08670	P08670;P41219;P17661;P41219-2;CON__Q9DCV7;CON__Q9NSB2;CON__Q6ISB0;P14136-3;P14136;P14136-2;Q9NSB2;CON__Q61726;CON__O43790;CON__Q6NT21;CON__P78385;CON__Q14533;CON__P78386;CON__Q8N1N4-2;CON__Q7RTT2;CON__P07744;Q8N1N4-2;O43790;P78385;Q16352;Q14533;P78386;Q8N1N4;P07197-2;P07196;P07197;P12036-2;P12036	>SP|P08670|VIME_HUMAN Vimentin OS=Homo sapiens OX=9606 GN=VIM PE=1 SV=4	VIM	24;2;2;2;0;0;0;1;1;1;0;0;0;0;0;0;0;0;0;0;0;0;0;1;0;0;0;1;1;1;1;1	32	24943000	2727800	11765000	2982200	6439700	4422900	800640	1699100	10544000	12851000	0.751712	0.83477	0.273484	TB-EOT	Non significant
P08697	P08697;P08697-2;CON__P28800	>SP|P08697|A2AP_HUMAN Alpha-2-antiplasmin OS=Homo sapiens OX=9606 GN=SERPINF2 PE=1 SV=3;>SP|P08697-2|A2AP_HUMAN Isoform 2 of Alpha-2-antiplasmin OS=Homo sapiens OX=9606 GN=SERPINF2	SERPINF2	13;11;3	3	942060	1503700	2779700	5084500	2856200	924550	2535700	4522500	2872700	1437900	0.00649552	0.0401614	1.70812	TB-EOT	Upregulated
P08708	P08708	>SP|P08708|RS17_HUMAN 40S ribosomal protein S17 OS=Homo sapiens OX=9606 GN=RPS17 PE=1 SV=2	RPS17	2	1	8628.9	121670	70693	41400	23751	240420	41362	39191	43045	377490	0.00836311	0.0465945	-1.67081	TB-EOT	Downregulated
P08754	P08754	>SP|P08754|GNAI3_HUMAN Guanine nucleotide-binding protein G(k) subunit alpha OS=Homo sapiens OX=9606 GN=GNAI3 PE=1 SV=3	GNAI3	3	1	25564	55223	154640	104860	120370	346960	63869	63357	141190	270460	0.355973	0.514671	-0.299842	TB-EOT	Non significant
P08758	P08758	>SP|P08758|ANXA5_HUMAN Annexin A5 OS=Homo sapiens OX=9606 GN=ANXA5 PE=1 SV=2	ANXA5	19	1	18744000	2245500	25572000	15507000	23159000	25087000	3826300	7858500	16824000	42779000	0.360577	0.519353	0.496099	TB-EOT	Non significant
P08865	P08865	>SP|P08865|RSSA_HUMAN 40S ribosomal protein SA OS=Homo sapiens OX=9606 GN=RPSA PE=1 SV=4	RPSA	10	1	113890	757450	3527600	872400	515680	3661300	779360	691490	761410	4448900	0.00592449	0.0377036	-1.43221	TB-EOT	Downregulated
P08962-3	P08962-3;P08962-2;P08962	>SP|P08962-3|CD63_HUMAN Isoform 3 of CD63 antigen OS=Homo sapiens OX=9606 GN=CD63;>SP|P08962-2|CD63_HUMAN Isoform 2 of CD63 antigen OS=Homo sapiens OX=9606 GN=CD63;>SP|P08962|CD63_HUMAN CD63 antigen OS=Homo sapiens OX=9606 GN=CD63 PE=1 SV=2	CD63	2;2;2	3	831790	644910	966740	832580	1426600	3503900	222060	797510	2174900	1690200	0.751569	0.83477	0.153895	TB-EOT	Non significant
P09104	P09104;P09104-2	>SP|P09104|ENOG_HUMAN Gamma-enolase OS=Homo sapiens OX=9606 GN=ENO2 PE=1 SV=3;>SP|P09104-2|ENOG_HUMAN Isoform 2 of Gamma-enolase OS=Homo sapiens OX=9606 GN=ENO2	ENO2	5;4	2	48646	41466	189520	300910	192340	985540	213410	238090	261830	213720	0.204062	0.356347	0.716291	TB-EOT	Non significant
P09211	P09211	>SP|P09211|GSTP1_HUMAN Glutathione S-transferase P OS=Homo sapiens OX=9606 GN=GSTP1 PE=1 SV=2	GSTP1	14	1	1310900	3360800	9387500	7732900	3457900	20966000	4516000	3957500	7938800	9746700	0.523773	0.657309	-0.259594	TB-EOT	Non significant
P09382	P09382	>SP|P09382|LEG1_HUMAN Galectin-1 OS=Homo sapiens OX=9606 GN=LGALS1 PE=1 SV=2	LGALS1	9	1	628350	1213500	4750700	2187300	1146900	3944500	768450	1169400	765780	3323500	0.0807719	0.196882	-0.683065	TB-EOT	Non significant
P09429	P09429;B2RPK0	>SP|P09429|HMGB1_HUMAN High mobility group protein B1 OS=Homo sapiens OX=9606 GN=HMGB1 PE=1 SV=3;>SP|B2RPK0|HGB1A_HUMAN Putative high mobility group protein B1-like 1 OS=Homo sapiens OX=9606 GN=HMGB1P1 PE=5 SV=1	HMGB1;HMGB1P1	4;2	2	4548100	1331700	5185500	1847200	3357600	7025600	3125800	2018300	6930700	7934600	0.380873	0.5359	0.421614	TB-EOT	Non significant
P09455	P09455;P09455-2;P09455-3	>SP|P09455|RET1_HUMAN Retinol-binding protein 1 OS=Homo sapiens OX=9606 GN=RBP1 PE=1 SV=2;>SP|P09455-2|RET1_HUMAN Isoform 2 of Retinol-binding protein 1 OS=Homo sapiens OX=9606 GN=RBP1;>SP|P09455-3|RET1_HUMAN Isoform 3 of Retinol-binding protein 1 OS=Homo sap	RBP1	2;1;1	3	64835	110940	63384	206370	106390	91901	96379	150210	93510	62011	0.0294068	0.103059	1.3449	TB-EOT	Non significant
P09467	P09467	>SP|P09467|F16P1_HUMAN Fructose-1,6-bisphosphatase 1 OS=Homo sapiens OX=9606 GN=FBP1 PE=1 SV=5	FBP1	17	1	746230	1610900	21912000	1241100	5508700	6323300	668020	1006600	1547500	13661000	0.00615388	0.0386452	-1.6348	TB-EOT	Downregulated
P09486	P09486	>SP|P09486|SPRC_HUMAN SPARC OS=Homo sapiens OX=9606 GN=SPARC PE=1 SV=1	SPARC	3	1	32462	55691	113820	141620	74145	124910	76774	103290	67373	115710	0.227039	0.384123	0.479412	TB-EOT	Non significant
P09488	P09488;P09488-2;Q03013-2;Q03013;Q03013-3	>SP|P09488|GSTM1_HUMAN Glutathione S-transferase Mu 1 OS=Homo sapiens OX=9606 GN=GSTM1 PE=1 SV=3;>SP|P09488-2|GSTM1_HUMAN Isoform 2 of Glutathione S-transferase Mu 1 OS=Homo sapiens OX=9606 GN=GSTM1;>SP|Q03013-2|GSTM4_HUMAN Isoform 2 of Glutathione S-transfer	GSTM1;GSTM4	2;1;0;0;0	5	393490	809790	536410	1491600	1076500	4124500	1613700	1006000	574630	3425300	0.901507	0.937246	0.0758629	TB-EOT	Non significant
P09496-5	P09496-5;P09496-2;P09496-4;P09496-3;P09496	>SP|P09496-5|CLCA_HUMAN Isoform 5 of Clathrin light chain A OS=Homo sapiens OX=9606 GN=CLTA;>SP|P09496-2|CLCA_HUMAN Isoform Non-brain of Clathrin light chain A OS=Homo sapiens OX=9606 GN=CLTA;>SP|P09496-4|CLCA_HUMAN Isoform 4 of Clathrin light chain A OS=Homo	CLTA	4;4;3;3;3	5	90083	50302	278270	113610	128670	253420	80127	66976	151830	239010	0.743685	0.829717	0.10334	TB-EOT	Non significant
P09525	P09525	>SP|P09525|ANXA4_HUMAN Annexin A4 OS=Homo sapiens OX=9606 GN=ANXA4 PE=1 SV=4	ANXA4	2	1	8616400	1607100	4835200	5766600	7158800	17807000	8237600	6630400	2643700	19945000	0.34147	0.500844	0.607823	TB-EOT	Non significant
P09603	P09603;P09603-3;P09603-2	>SP|P09603|CSF1_HUMAN Macrophage colony-stimulating factor 1 OS=Homo sapiens OX=9606 GN=CSF1 PE=1 SV=2;>SP|P09603-3|CSF1_HUMAN Isoform 3 of Macrophage colony-stimulating factor 1 OS=Homo sapiens OX=9606 GN=CSF1;>SP|P09603-2|CSF1_HUMAN Isoform 2 of Macrophage	CSF1	10;7;7	3	436710	198350	528980	476290	493700	2751800	19961	100360	421040	994180	0.254353	0.415991	-0.941664	TB-EOT	Non significant
P09651-3	P09651-3;Q32P51;P09651-2;P09651	>SP|P09651-3|ROA1_HUMAN Isoform 2 of Heterogeneous nuclear ribonucleoprotein A1 OS=Homo sapiens OX=9606 GN=HNRNPA1;>SP|Q32P51|RA1L2_HUMAN Heterogeneous nuclear ribonucleoprotein A1-like 2 OS=Homo sapiens OX=9606 GN=HNRNPA1L2 PE=2 SV=2;>SP|P09651-2|ROA1_HUMAN	HNRNPA1;HNRNPA1L2	2;2;2;2	4	6273.1	3150.8	16541	9613.4	15459	15254	7718.6	9152.9	72056	17027	0.030436	0.105193	1.12258	TB-EOT	Non significant
P09668	P09668	>SP|P09668|CATH_HUMAN Pro-cathepsin H OS=Homo sapiens OX=9606 GN=CTSH PE=1 SV=4	CTSH	7	1	1882900	1143800	5749500	10297000	2786000	7495800	261120	558270	1134800	21867000	0.167397	0.315894	-1.13457	TB-EOT	Non significant
P09871	P09871;P48740-3;P48740-4;P48740;P48740-2	>SP|P09871|C1S_HUMAN Complement C1s subcomponent OS=Homo sapiens OX=9606 GN=C1S PE=1 SV=1	C1S	15;1;1;1;1	5	289880	352270	682830	1095100	1947400	574650	1729800	2015900	1608300	560630	0.000848319	0.011188	2.07874	TB-EOT	Upregulated
P09917	P09917;P09917-5;P09917-2;P09917-3;P09917-4	>SP|P09917|LOX5_HUMAN Arachidonate 5-lipoxygenase OS=Homo sapiens OX=9606 GN=ALOX5 PE=1 SV=2;>SP|P09917-5|LOX5_HUMAN Isoform 5 of Arachidonate 5-lipoxygenase OS=Homo sapiens OX=9606 GN=ALOX5;>SP|P09917-2|LOX5_HUMAN Isoform 2 of Arachidonate 5-lipoxygenase OS=	ALOX5	5;4;4;4;1	5	9510	12789	44799	20258	38687	44689	7290.3	13344	13915	182830	0.0833179	0.199423	-0.804544	TB-EOT	Non significant
P09936	P09936	>SP|P09936|UCHL1_HUMAN Ubiquitin carboxyl-terminal hydrolase isozyme L1 OS=Homo sapiens OX=9606 GN=UCHL1 PE=1 SV=2	UCHL1	7	1	165500	347370	2236600	559970	553100	5055900	105610	392920	314620	1242300	0.00765681	0.0441137	-1.4719	TB-EOT	Downregulated
P09960	P09960;P09960-2;P09960-4;P09960-3	>SP|P09960|LKHA4_HUMAN Leukotriene A-4 hydrolase OS=Homo sapiens OX=9606 GN=LTA4H PE=1 SV=2;>SP|P09960-2|LKHA4_HUMAN Isoform 2 of Leukotriene A-4 hydrolase OS=Homo sapiens OX=9606 GN=LTA4H;>SP|P09960-4|LKHA4_HUMAN Isoform 4 of Leukotriene A-4 hydrolase OS=Hom	LTA4H	30;25;25;20	4	1448100	6436100	36652000	14912000	9095300	38345000	1531700	6191200	4635700	57624000	0.00262754	0.0219588	-1.71124	TB-EOT	Downregulated
P0C0L4	P0C0L4;P0C0L4-2;CON__ENSEMBL:ENSBTAP00000007350;CON__P01030	>SP|P0C0L4|CO4A_HUMAN Complement C4-A OS=Homo sapiens OX=9606 GN=C4A PE=1 SV=2;>SP|P0C0L4-2|CO4A_HUMAN Isoform 2 of Complement C4-A OS=Homo sapiens OX=9606 GN=C4A	C4A	2;2;0;0	4	108720	59482	197280	791540	1485900	220370	108900	274560	422050	127980	0.000804355	0.011188	2.20171	TB-EOT	Upregulated
P0C0L5	P0C0L5	>SP|P0C0L5|CO4B_HUMAN Complement C4-B OS=Homo sapiens OX=9606 GN=C4B PE=1 SV=2	C4B	4	1	2596600	9611300	20627000	35865000	50070000	21481000	26144000	47823000	14296000	12890000	0.0647446	0.171264	1.30669	TB-EOT	Non significant
P0C672	P0C672	>SP|P0C672|TSN19_HUMAN Putative tetraspanin-19 OS=Homo sapiens OX=9606 GN=TSPAN19 PE=5 SV=1	TSPAN19	2	1	8086	1965.8	18572	11300	27483	18372	8393.5	7497.3	24869	19881	0.0143709	0.0660334	1.08262	TB-EOT	Non significant
P0DMV9	P0DMV9;P0DMV8;P0DMV8-2	>SP|P0DMV9|HS71B_HUMAN Heat shock 70 kDa protein 1B OS=Homo sapiens OX=9606 GN=HSPA1B PE=1 SV=1;>SP|P0DMV8|HS71A_HUMAN Heat shock 70 kDa protein 1A OS=Homo sapiens OX=9606 GN=HSPA1A PE=1 SV=1;>SP|P0DMV8-2|HS71A_HUMAN Isoform 2 of Heat shock 70 kDa protein 1A	HSPA1B;HSPA1A	10;10;9	3	2170000	3660900	16210000	5040500	3601400	17339000	4268600	4177700	5091900	12357000	0.091166	0.211056	-0.583792	TB-EOT	Non significant
P0DOY3	P0DOY3;P0DOY2;P0CF74	>SP|P0DOY3|IGLC3_HUMAN Immunoglobulin lambda constant 3 OS=Homo sapiens OX=9606 GN=IGLC3 PE=1 SV=1;>SP|P0DOY2|IGLC2_HUMAN Immunoglobulin lambda constant 2 OS=Homo sapiens OX=9606 GN=IGLC2 PE=1 SV=1;>SP|P0CF74|IGLC6_HUMAN Immunoglobulin lambda constant 6 OS=Ho	IGLC6	2;2;0	3	7836300	3756100	9947000	25148000	11538000	3847300	9654600	13956000	16783000	2553900	0.000340793	0.00729387	2.44297	TB-EOT	Upregulated
P0DP04	P0DP04;P01782	>SP|P0DP04|HV43D_HUMAN Immunoglobulin heavy variable 3-43D OS=Homo sapiens OX=9606 GN=IGHV3-43D PE=3 SV=1;>SP|P01782|HV309_HUMAN Immunoglobulin heavy variable 3-9 OS=Homo sapiens OX=9606 GN=IGHV3-9 PE=1 SV=2		2;2	2	455260	166930	621780	3233500	1271400	549860	715380	698470	1772600	283030	4.76984e-05	0.00421529	2.46689	TB-EOT	Upregulated
P0DP09	P0DP09;A0A0B4J2D9	>SP|P0DP09|KV113_HUMAN Immunoglobulin kappa variable 1-13 OS=Homo sapiens OX=9606 GN=IGKV1-13 PE=3 SV=1;>SP|A0A0B4J2D9|KVD13_HUMAN Immunoglobulin kappa variable 1D-13 OS=Homo sapiens OX=9606 GN=IGKV1D-13 PE=3 SV=1	IGKV1D-13	2;2	2	8490.4	9187.6	39946	67038	45050	17433	21439	43963	11780	14226	0.0257079	0.0944141	1.41969	TB-EOT	Non significant
P0DP25	P0DP25;P0DP24;P0DP23;P27482;P02585	>SP|P0DP25|CALM3_HUMAN Calmodulin-3 OS=Homo sapiens OX=9606 GN=CALM3 PE=1 SV=1;>SP|P0DP24|CALM2_HUMAN Calmodulin-2 OS=Homo sapiens OX=9606 GN=CALM2 PE=1 SV=1;>SP|P0DP23|CALM1_HUMAN Calmodulin-1 OS=Homo sapiens OX=9606 GN=CALM1 PE=1 SV=1		12;12;12;2;1	5	16135000	516990	5262600	3300500	4317500	5434900	748220	1630400	15532000	5339000	0.129405	0.265541	1.29647	TB-EOT	Non significant
P10155-3	P10155-3;P10155-5;P10155-4;P10155	>SP|P10155-3|RO60_HUMAN Isoform 3 of 60 kDa SS-A/Ro ribonucleoprotein OS=Homo sapiens OX=9606 GN=TROVE2;>SP|P10155-5|RO60_HUMAN Isoform 5 of 60 kDa SS-A/Ro ribonucleoprotein OS=Homo sapiens OX=9606 GN=TROVE2;>SP|P10155-4|RO60_HUMAN Isoform 4 of 60 kDa SS-A/Ro	TROVE2	5;5;5;5	4	8417.6	37860	34949	65551	69584	337240	141190	73515	94864	574520	0.730735	0.821469	-0.269746	TB-EOT	Non significant
P10163	P10163;Q04118	>SP|P10163|PRB4_HUMAN Basic salivary proline-rich protein 4 OS=Homo sapiens OX=9606 GN=PRB4 PE=1 SV=4;>SP|Q04118|PRB3_HUMAN Basic salivary proline-rich protein 3 OS=Homo sapiens OX=9606 GN=PRB3 PE=1 SV=2	PRB4;PRB3	2;1	2	235800	1794.8	65545	42547	33750	42609	3271.4	3392	371230	9783.6	0.146193	0.288404	2.02483	TB-EOT	Non significant
P10253	P10253	>SP|P10253|LYAG_HUMAN Lysosomal alpha-glucosidase OS=Homo sapiens OX=9606 GN=GAA PE=1 SV=4	GAA	15	1	1572200	1007100	2185000	1363400	846930	5572600	326280	569570	962750	11942000	0.0430971	0.13032	-1.21158	TB-EOT	Non significant
P10301	P10301;P62070-3;P62070;P62070-4	>SP|P10301|RRAS_HUMAN Ras-related protein R-Ras OS=Homo sapiens OX=9606 GN=RRAS PE=1 SV=1	RRAS	3;1;1;1	4	97621	119620	77094	120370	97411	180560	64208	51811	148430	190750	0.525344	0.657652	0.303324	TB-EOT	Non significant
P10451-5	P10451-5;P10451-4;P10451-2;P10451;P10451-3	>SP|P10451-5|OSTP_HUMAN Isoform 5 of Osteopontin OS=Homo sapiens OX=9606 GN=SPP1;>SP|P10451-4|OSTP_HUMAN Isoform D of Osteopontin OS=Homo sapiens OX=9606 GN=SPP1;>SP|P10451-2|OSTP_HUMAN Isoform B of Osteopontin OS=Homo sapiens OX=9606 GN=SPP1;>SP|P10451|OSTP_H	SPP1	4;3;3;3;2	5	83197	69711	309540	240910	252290	790010	269130	275470	115720	142070	0.284348	0.447391	0.614335	TB-EOT	Non significant
P10599-2	P10599-2;P10599	>SP|P10599-2|THIO_HUMAN Isoform 2 of Thioredoxin OS=Homo sapiens OX=9606 GN=TXN;>SP|P10599|THIO_HUMAN Thioredoxin OS=Homo sapiens OX=9606 GN=TXN PE=1 SV=3	TXN	4;4	2	2121000	497620	2376000	1115200	737940	3446600	676580	438190	2464100	2222000	0.826781	0.889346	0.121116	TB-EOT	Non significant
P10619-2	P10619-2;P10619	>SP|P10619-2|PPGB_HUMAN Isoform 2 of Lysosomal protective protein OS=Homo sapiens OX=9606 GN=CTSA;>SP|P10619|PPGB_HUMAN Lysosomal protective protein OS=Homo sapiens OX=9606 GN=CTSA PE=1 SV=2	CTSA	5;5	2	256610	293900	445360	313160	237760	918260	72474	95555	238590	2304300	0.0332975	0.109622	-1.17144	TB-EOT	Non significant
P10643	P10643;CON__Q29RQ1;Q12884	>SP|P10643|CO7_HUMAN Complement component C7 OS=Homo sapiens OX=9606 GN=C7 PE=1 SV=2	C7	23;3;1	3	240250	882390	2026400	5551500	2852900	1053500	2216300	4895700	1554000	1104300	0.0340249	0.109877	1.59376	TB-EOT	Non significant
P10696	P10696;P05187;P09923	>SP|P10696|PPBN_HUMAN Alkaline phosphatase, germ cell type OS=Homo sapiens OX=9606 GN=ALPG PE=2 SV=4;>SP|P05187|PPB1_HUMAN Alkaline phosphatase, placental type OS=Homo sapiens OX=9606 GN=ALPP PE=1 SV=2	ALPPL2;ALPP	8;8;2	3	112190	148440	145980	1783000	944100	351620	65810	82934	181700	1012300	0.494745	0.631492	0.54822	TB-EOT	Non significant
P10768	P10768	>SP|P10768|ESTD_HUMAN S-formylglutathione hydrolase OS=Homo sapiens OX=9606 GN=ESD PE=1 SV=2	ESD	7	1	267860	568550	2663600	1654300	865190	3729800	1980600	1447400	714170	5121600	0.44224	0.587437	-0.414494	TB-EOT	Non significant
P10809	P10809;P10809-2	>SP|P10809|CH60_HUMAN 60 kDa heat shock protein, mitochondrial OS=Homo sapiens OX=9606 GN=HSPD1 PE=1 SV=2	HSPD1	7;1	2	260800	166070	619990	345130	357570	716460	183420	240120	193010	1701000	0.365594	0.523112	-0.366647	TB-EOT	Non significant
P10909-4	P10909-4;P10909;P10909-5;P10909-2;P10909-3	>SP|P10909-4|CLUS_HUMAN Isoform 4 of Clusterin OS=Homo sapiens OX=9606 GN=CLU;>SP|P10909|CLUS_HUMAN Clusterin OS=Homo sapiens OX=9606 GN=CLU PE=1 SV=1;>SP|P10909-5|CLUS_HUMAN Isoform 5 of Clusterin OS=Homo sapiens OX=9606 GN=CLU;>SP|P10909-2|CLUS_HUMAN Isoform	CLU	11;11;11;11;6	5	4004500	1224500	5546900	5751500	10797000	4480700	1241900	3450800	8224200	2596700	0.00515319	0.0342135	1.46419	TB-EOT	Upregulated
P11021	P11021	>SP|P11021|BIP_HUMAN Endoplasmic reticulum chaperone BiP OS=Homo sapiens OX=9606 GN=HSPA5 PE=1 SV=2	HSPA5	15	1	2849400	965600	3490000	3172300	2017300	2954800	1162800	1299300	4518800	3966200	0.0974173	0.221482	0.691442	TB-EOT	Non significant
P11117	P11117;P11117-2	>SP|P11117|PPAL_HUMAN Lysosomal acid phosphatase OS=Homo sapiens OX=9606 GN=ACP2 PE=1 SV=3	ACP2	4;1	2	34143	42390	121460	111580	68914	246930	49615	73940	68546	264070	0.467306	0.606979	-0.232974	TB-EOT	Non significant
P11142	P11142;P11142-2;P54652;P9WMJ9	>SP|P11142|HSP7C_HUMAN Heat shock cognate 71 kDa protein OS=Homo sapiens OX=9606 GN=HSPA8 PE=1 SV=1;>SP|P11142-2|HSP7C_HUMAN Isoform 2 of Heat shock cognate 71 kDa protein OS=Homo sapiens OX=9606 GN=HSPA8	HSPA8	25;19;6;0	4	8863700	6414200	35854000	10972000	11475000	32598000	7283600	7665100	13570000	37308000	0.224098	0.379993	-0.384453	TB-EOT	Non significant
P11215	P11215;P11215-2;Q13349	>SP|P11215|ITAM_HUMAN Integrin alpha-M OS=Homo sapiens OX=9606 GN=ITGAM PE=1 SV=2;>SP|P11215-2|ITAM_HUMAN Isoform 2 of Integrin alpha-M OS=Homo sapiens OX=9606 GN=ITGAM	ITGAM	15;15;0	3	418800	111590	420210	182400	1041400	380420	248850	369970	587890	503040	0.0154347	0.0686439	1.24746	TB-EOT	Non significant
P11216	P11216;P11217-2;P11217	>SP|P11216|PYGB_HUMAN Glycogen phosphorylase, brain form OS=Homo sapiens OX=9606 GN=PYGB PE=1 SV=5	PYGB	7;1;1	3	32179	102340	269880	147380	177110	237900	85433	143830	142000	524120	0.3436	0.503007	-0.327222	TB-EOT	Non significant
P11233	P11233	>SP|P11233|RALA_HUMAN Ras-related protein Ral-A OS=Homo sapiens OX=9606 GN=RALA PE=1 SV=1	RALA	2	1	11240	22667	44562	39138	34997	56137	14420	16877	34553	57074	0.839383	0.897821	-0.0578047	TB-EOT	Non significant
P11234	P11234;P11234-3;P11234-2	>SP|P11234|RALB_HUMAN Ras-related protein Ral-B OS=Homo sapiens OX=9606 GN=RALB PE=1 SV=1;>SP|P11234-3|RALB_HUMAN Isoform 3 of Ras-related protein Ral-B OS=Homo sapiens OX=9606 GN=RALB;>SP|P11234-2|RALB_HUMAN Isoform 2 of Ras-related protein Ral-B OS=Homo sap	RALB	3;3;3	3	40152	51393	153390	147710	159090	222470	64087	65595	166140	248810	0.41665	0.563953	0.22569	TB-EOT	Non significant
P11279	P11279;P11279-2	>SP|P11279|LAMP1_HUMAN Lysosome-associated membrane glycoprotein 1 OS=Homo sapiens OX=9606 GN=LAMP1 PE=1 SV=3;>SP|P11279-2|LAMP1_HUMAN Isoform 2 of Lysosome-associated membrane glycoprotein 1 OS=Homo sapiens OX=9606 GN=LAMP1	LAMP1	4;3	2	2131600	1061600	811750	1143300	1021900	2777400	364710	367240	1245300	2245900	0.949188	0.970238	0.039503	TB-EOT	Non significant
P11413	P11413;P11413-3;P11413-2	>SP|P11413|G6PD_HUMAN Glucose-6-phosphate 1-dehydrogenase OS=Homo sapiens OX=9606 GN=G6PD PE=1 SV=4;>SP|P11413-3|G6PD_HUMAN Isoform 3 of Glucose-6-phosphate 1-dehydrogenase OS=Homo sapiens OX=9606 GN=G6PD;>SP|P11413-2|G6PD_HUMAN Isoform Long of Glucose-6-phos	G6PD	19;19;19	3	300430	1472200	5719300	792680	2237900	4674800	424710	647350	958610	7484200	0.000294867	0.00655633	-1.66525	TB-EOT	Downregulated
P11586	P11586	>SP|P11586|C1TC_HUMAN C-1-tetrahydrofolate synthase, cytoplasmic OS=Homo sapiens OX=9606 GN=MTHFD1 PE=1 SV=3	MTHFD1	6	1	14996	30276	98013	40963	96406	107090	15934	24608	45618	129560	0.169342	0.31731	-0.469706	TB-EOT	Non significant
P11678	P11678	>SP|P11678|PERE_HUMAN Eosinophil peroxidase OS=Homo sapiens OX=9606 GN=EPX PE=1 SV=2	EPX	3	1	4970.2	3646.7	34969	15549	19333	35899	12338	14362	34130	40702	0.390876	0.541459	0.331679	TB-EOT	Non significant
P11684	P11684	>SP|P11684|UTER_HUMAN Uteroglobin OS=Homo sapiens OX=9606 GN=SCGB1A1 PE=1 SV=1	SCGB1A1	4	1	9418800	712700	1703600	3868500	2411100	5221100	2868700	1186600	15205000	6698500	0.0476862	0.138786	1.53043	TB-EOT	Non significant
P11717	P11717	>SP|P11717|MPRI_HUMAN Cation-independent mannose-6-phosphate receptor OS=Homo sapiens OX=9606 GN=IGF2R PE=1 SV=3	IGF2R	5	1	23072	16107	42981	47720	63150	61887	28595	40733	61626	48356	0.00219785	0.0206353	0.98117	TB-EOT	Non significant
P11766	P11766	>SP|P11766|ADHX_HUMAN Alcohol dehydrogenase class-3 OS=Homo sapiens OX=9606 GN=ADH5 PE=1 SV=4	ADH5	9	1	188190	917000	2194900	1105600	966170	2023600	878670	1236200	1621600	2872400	0.493117	0.630808	-0.279376	TB-EOT	Non significant
P11940-2	P11940-2;P11940;Q9H361;Q4VXU2-2;Q4VXU2;Q5JQF8;Q96DU9-2;Q96DU9;Q13310-2;Q13310;Q13310-3	>SP|P11940-2|PABP1_HUMAN Isoform 2 of Polyadenylate-binding protein 1 OS=Homo sapiens OX=9606 GN=PABPC1;>SP|P11940|PABP1_HUMAN Polyadenylate-binding protein 1 OS=Homo sapiens OX=9606 GN=PABPC1 PE=1 SV=2;>SP|Q9H361|PABP3_HUMAN Polyadenylate-binding protein 3 O	PABPC1;PABPC3	7;7;4;2;2;1;1;1;1;1;1	11	48689	173780	239830	140290	153880	298520	93514	99907	205040	489330	0.175998	0.324084	-0.456347	TB-EOT	Non significant
P12081-4	P12081-4;P12081;P12081-3;P12081-2;P49590-2;P49590	>SP|P12081-4|SYHC_HUMAN Isoform 4 of Histidine--tRNA ligase, cytoplasmic OS=Homo sapiens OX=9606 GN=HARS;>SP|P12081|SYHC_HUMAN Histidine--tRNA ligase, cytoplasmic OS=Homo sapiens OX=9606 GN=HARS PE=1 SV=2;>SP|P12081-3|SYHC_HUMAN Isoform 3 of Histidine--tRNA l	HARS	11;11;10;10;3;3	6	67388	317920	1141800	413700	358360	1023400	296300	331910	245510	1366500	0.0330121	0.109393	-0.901025	TB-EOT	Non significant
P12111-4	P12111-4;P12111-2;P12111	>SP|P12111-4|CO6A3_HUMAN Isoform 4 of Collagen alpha-3(VI) chain OS=Homo sapiens OX=9606 GN=COL6A3;>SP|P12111-2|CO6A3_HUMAN Isoform 2 of Collagen alpha-3(VI) chain OS=Homo sapiens OX=9606 GN=COL6A3;>SP|P12111|CO6A3_HUMAN Collagen alpha-3(VI) chain OS=Homo sap	COL6A3	2;2;2	3	11074	5019.4	25200	55736	64867	10272	23694	76229	14891	10760	0.000834229	0.011188	2.41526	TB-EOT	Upregulated
P12259	P12259	>SP|P12259|FA5_HUMAN Coagulation factor V OS=Homo sapiens OX=9606 GN=F5 PE=1 SV=4	F5	2	1	7422.9	1391.3	9954.2	16751	7159.4	5169.2	10856	17472	23957	2938	9.65882e-05	0.00456573	2.58618	TB-EOT	Upregulated
P12273	P12273	>SP|P12273|PIP_HUMAN Prolactin-inducible protein OS=Homo sapiens OX=9606 GN=PIP PE=1 SV=1	PIP	8	1	4857600	66394	2131700	1885700	743310	725540	349190	58528	20156000	325710	0.0977021	0.221798	2.33083	TB-EOT	Non significant
P12277	P12277;P06732	>SP|P12277|KCRB_HUMAN Creatine kinase B-type OS=Homo sapiens OX=9606 GN=CKB PE=1 SV=1	CKB	7;1	2	115680	203590	1357900	1337000	497740	513300	1522400	1000900	1127100	639450	0.0614939	0.166635	1.23636	TB-EOT	Non significant
P12429	P12429	>SP|P12429|ANXA3_HUMAN Annexin A3 OS=Homo sapiens OX=9606 GN=ANXA3 PE=1 SV=3	ANXA3	17	1	4276900	651980	3801500	11362000	19117000	2770800	6634000	6159000	12605000	2996000	3.49545281789299e-7	0.000274596	2.91131	TB-EOT	Upregulated
P12814	P12814;P12814-3;P12814-2;P12814-4;P35609-2;P35609;Q08043	>SP|P12814|ACTN1_HUMAN Alpha-actinin-1 OS=Homo sapiens OX=9606 GN=ACTN1 PE=1 SV=2;>SP|P12814-3|ACTN1_HUMAN Isoform 3 of Alpha-actinin-1 OS=Homo sapiens OX=9606 GN=ACTN1;>SP|P12814-2|ACTN1_HUMAN Isoform 2 of Alpha-actinin-1 OS=Homo sapiens OX=9606 GN=ACTN1;>SP|	ACTN1	28;27;26;25;4;4;2	7	4006000	1469900	10919000	2451400	15290000	15478000	1422200	2404400	3189800	22178000	0.420091	0.563953	-0.469985	TB-EOT	Non significant
P12821	P12821;P12821-2;P12821-4;P12821-3	>SP|P12821|ACE_HUMAN Angiotensin-converting enzyme OS=Homo sapiens OX=9606 GN=ACE PE=1 SV=1;>SP|P12821-2|ACE_HUMAN Isoform Somatic-2 of Angiotensin-converting enzyme OS=Homo sapiens OX=9606 GN=ACE;>SP|P12821-4|ACE_HUMAN Isoform 4 of Angiotensin-converting enz	ACE	23;21;13;13	4	340820	1146200	2164900	2509200	2248500	5375600	201360	716640	720710	3639200	0.0880395	0.205621	-0.929967	TB-EOT	Non significant
P12830	P12830;P12830-2	>SP|P12830|CADH1_HUMAN Cadherin-1 OS=Homo sapiens OX=9606 GN=CDH1 PE=1 SV=3;>SP|P12830-2|CADH1_HUMAN Isoform 2 of Cadherin-1 OS=Homo sapiens OX=9606 GN=CDH1	CDH1	4;3	2	416090	39182	160290	259750	232920	342870	91649	92790	836840	148600	0.0120378	0.0580352	1.68534	TB-EOT	Non significant
P12955	P12955;P12955-3;P12955-2	>SP|P12955|PEPD_HUMAN Xaa-Pro dipeptidase OS=Homo sapiens OX=9606 GN=PEPD PE=1 SV=3;>SP|P12955-3|PEPD_HUMAN Isoform 3 of Xaa-Pro dipeptidase OS=Homo sapiens OX=9606 GN=PEPD;>SP|P12955-2|PEPD_HUMAN Isoform 2 of Xaa-Pro dipeptidase OS=Homo sapiens OX=9606 GN=PE	PEPD	15;13;12	3	1403200	851640	3534800	2040100	2429700	3542700	804880	879860	1547200	6083400	0.645	0.752335	-0.15924	TB-EOT	Non significant
P12956	P12956;P12956-2	>SP|P12956|XRCC6_HUMAN X-ray repair cross-complementing protein 6 OS=Homo sapiens OX=9606 GN=XRCC6 PE=1 SV=2;>SP|P12956-2|XRCC6_HUMAN Isoform 2 of X-ray repair cross-complementing protein 6 OS=Homo sapiens OX=9606 GN=XRCC6	XRCC6	10;9	2	82714	104440	849580	179650	229420	486350	166900	219250	270130	1246300	0.137043	0.274991	-0.564637	TB-EOT	Non significant
P13010	P13010	>SP|P13010|XRCC5_HUMAN X-ray repair cross-complementing protein 5 OS=Homo sapiens OX=9606 GN=XRCC5 PE=1 SV=3	XRCC5	11	1	85720	135610	974710	225360	377530	605420	179920	253910	494180	1322800	0.23463	0.392167	-0.427422	TB-EOT	Non significant
P13473-2	P13473-2;P13473;P13473-3	>SP|P13473-2|LAMP2_HUMAN Isoform LAMP-2B of Lysosome-associated membrane glycoprotein 2 OS=Homo sapiens OX=9606 GN=LAMP2;>SP|P13473|LAMP2_HUMAN Lysosome-associated membrane glycoprotein 2 OS=Homo sapiens OX=9606 GN=LAMP2 PE=1 SV=2;>SP|P13473-3|LAMP2_HUMAN Iso	LAMP2	5;5;5	3	299050	89117	137060	330760	180030	270340	67547	79362	265880	277350	0.117025	0.250291	0.836192	TB-EOT	Non significant
P13489	P13489	>SP|P13489|RINI_HUMAN Ribonuclease inhibitor OS=Homo sapiens OX=9606 GN=RNH1 PE=1 SV=2	RNH1	17	1	255810	1509800	8430700	3616000	1808200	7123900	1054800	2048600	1276300	7583200	0.0282426	0.100133	-1.13141	TB-EOT	Non significant
P13611-2	P13611-2;P13611-5;P13611;P13611-4;P13611-3	>SP|P13611-2|CSPG2_HUMAN Isoform V1 of Versican core protein OS=Homo sapiens OX=9606 GN=VCAN;>SP|P13611-5|CSPG2_HUMAN Isoform Vint of Versican core protein OS=Homo sapiens OX=9606 GN=VCAN;>SP|P13611|CSPG2_HUMAN Versican core protein OS=Homo sapiens OX=9606 GN	VCAN	2;2;2;1;1	5	62497	11173	18952	34171	31481	21116	15132	25283	27655	13723	0.00517364	0.0342135	1.78208	TB-EOT	Upregulated
P13639	P13639;Q15029-2;Q15029-3;Q15029	>SP|P13639|EF2_HUMAN Elongation factor 2 OS=Homo sapiens OX=9606 GN=EEF2 PE=1 SV=4	EEF2	12;1;1;1	4	130650	345470	1071100	501350	922510	838870	185120	272890	1339700	1061900	0.872164	0.915777	-0.064687	TB-EOT	Non significant
P13667	P13667	>SP|P13667|PDIA4_HUMAN Protein disulfide-isomerase A4 OS=Homo sapiens OX=9606 GN=PDIA4 PE=1 SV=2	PDIA4	22	1	529100	882700	4713300	1944700	1484500	3463600	1650900	1541400	4814500	6473300	0.848741	0.900862	-0.0741941	TB-EOT	Non significant
P13671	P13671	>SP|P13671|CO6_HUMAN Complement component C6 OS=Homo sapiens OX=9606 GN=C6 PE=1 SV=3	C6	17	1	309210	1270800	1882800	1859800	1140400	833400	1653000	2463200	1611400	1057300	0.128506	0.264847	0.939206	TB-EOT	Non significant
P13686	P13686	>SP|P13686|PPA5_HUMAN Tartrate-resistant acid phosphatase type 5 OS=Homo sapiens OX=9606 GN=ACP5 PE=1 SV=3	ACP5	2	1	26546	97571	166780	48301	43573	268310	7149.2	26132	9826.8	532740	0.000700092	0.0108941	-2.48612	TB-EOT	Downregulated
P13693	P13693;P13693-2;Q56UQ5	>SP|P13693|TCTP_HUMAN Translationally-controlled tumor protein OS=Homo sapiens OX=9606 GN=TPT1 PE=1 SV=1;>SP|P13693-2|TCTP_HUMAN Isoform 2 of Translationally-controlled tumor protein OS=Homo sapiens OX=9606 GN=TPT1;>SP|Q56UQ5|TPT1L_HUMAN TPT1-like protein OS=	TPT1	4;2;2	3	260560	445330	2419500	1124300	756730	2766900	518830	555460	1048800	2483700	0.0945826	0.21797	-0.514692	TB-EOT	Non significant
P13716	P13716;P13716-2	>SP|P13716|HEM2_HUMAN Delta-aminolevulinic acid dehydratase OS=Homo sapiens OX=9606 GN=ALAD PE=1 SV=1;>SP|P13716-2|HEM2_HUMAN Isoform 2 of Delta-aminolevulinic acid dehydratase OS=Homo sapiens OX=9606 GN=ALAD	ALAD	6;6	2	248890	159770	891220	814800	343620	368420	691890	571490	437350	482870	0.0273024	0.0986388	1.12063	TB-EOT	Non significant
P13727-2	P13727-2;P13727	>SP|P13727-2|PRG2_HUMAN Isoform 2 of Bone marrow proteoglycan OS=Homo sapiens OX=9606 GN=PRG2;>SP|P13727|PRG2_HUMAN Bone marrow proteoglycan OS=Homo sapiens OX=9606 GN=PRG2 PE=1 SV=2	PRG2	2;2	2	8777.1	13581	69554	15472	12212	59337	10141	22960	47466	35366	0.401072	0.549577	-0.351076	TB-EOT	Non significant
P13796	P13796;P13796-2	>SP|P13796|PLSL_HUMAN Plastin-2 OS=Homo sapiens OX=9606 GN=LCP1 PE=1 SV=6	LCP1	29;10	2	7624100	5346500	35018000	13582000	30759000	46671000	2671700	6135600	3922000	65246000	0.106922	0.236035	-0.982263	TB-EOT	Non significant
P13797	P13797;P13797-3;P13797-2	>SP|P13797|PLST_HUMAN Plastin-3 OS=Homo sapiens OX=9606 GN=PLS3 PE=1 SV=4;>SP|P13797-3|PLST_HUMAN Isoform 3 of Plastin-3 OS=Homo sapiens OX=9606 GN=PLS3;>SP|P13797-2|PLST_HUMAN Isoform 2 of Plastin-3 OS=Homo sapiens OX=9606 GN=PLS3	PLS3	13;11;11	3	218180	499330	1113500	3242200	584960	3073000	1464400	2850100	366440	2230500	0.722614	0.813543	0.264792	TB-EOT	Non significant
P13798	P13798	>SP|P13798|ACPH_HUMAN Acylamino-acid-releasing enzyme OS=Homo sapiens OX=9606 GN=APEH PE=1 SV=4	APEH	12	1	176930	332610	2389600	1104400	924360	2369200	831280	814860	572810	2731800	0.389157	0.540351	-0.372518	TB-EOT	Non significant
P13861-2	P13861-2;P13861	>SP|P13861-2|KAP2_HUMAN Isoform 2 of cAMP-dependent protein kinase type II-alpha regulatory subunit OS=Homo sapiens OX=9606 GN=PRKAR2A;>SP|P13861|KAP2_HUMAN cAMP-dependent protein kinase type II-alpha regulatory subunit OS=Homo sapiens OX=9606 GN=PRKAR2A PE=	PRKAR2A	7;7	2	77045	82125	412700	234700	245360	528050	111400	170440	556670	558240	0.707875	0.801696	0.121931	TB-EOT	Non significant
P13987	P13987	>SP|P13987|CD59_HUMAN CD59 glycoprotein OS=Homo sapiens OX=9606 GN=CD59 PE=1 SV=1	CD59	4	1	975380	269900	1338600	760770	1588300	3575700	381620	327310	2284800	1564800	0.516775	0.651059	0.3415	TB-EOT	Non significant
P14151	P14151;P14151-2	>SP|P14151|LYAM1_HUMAN L-selectin OS=Homo sapiens OX=9606 GN=SELL PE=1 SV=2;>SP|P14151-2|LYAM1_HUMAN Isoform 2 of L-selectin OS=Homo sapiens OX=9606 GN=SELL	SELL	6;6	2	1203100	393370	363990	531900	991200	300770	468450	894230	917190	222380	0.00267567	0.0219984	2.19444	TB-EOT	Upregulated
P14174	P14174	>SP|P14174|MIF_HUMAN Macrophage migration inhibitory factor OS=Homo sapiens OX=9606 GN=MIF PE=1 SV=4	MIF	2	1	49486	48599	280530	254210	203160	464070	143710	162300	150020	399290	0.554298	0.681007	0.219398	TB-EOT	Non significant
P14314-2	P14314-2;P14314	>SP|P14314-2|GLU2B_HUMAN Isoform 2 of Glucosidase 2 subunit beta OS=Homo sapiens OX=9606 GN=PRKCSH;>SP|P14314|GLU2B_HUMAN Glucosidase 2 subunit beta OS=Homo sapiens OX=9606 GN=PRKCSH PE=1 SV=2	PRKCSH	10;10	2	1101400	246570	1110400	574130	1046600	1035500	275740	357370	2259300	1576200	0.185846	0.338124	0.687405	TB-EOT	Non significant
P14317	P14317;P14317-2	>SP|P14317|HCLS1_HUMAN Hematopoietic lineage cell-specific protein OS=Homo sapiens OX=9606 GN=HCLS1 PE=1 SV=3	HCLS1	9;1	2	278150	387770	2842300	693850	625280	3386800	81065	368860	421900	3834300	0.00243834	0.0212684	-1.66237	TB-EOT	Downregulated
P14324-2	P14324-2;P14324	>SP|P14324-2|FPPS_HUMAN Isoform 2 of Farnesyl pyrophosphate synthase OS=Homo sapiens OX=9606 GN=FDPS;>SP|P14324|FPPS_HUMAN Farnesyl pyrophosphate synthase OS=Homo sapiens OX=9606 GN=FDPS PE=1 SV=4	FDPS	9;9	2	241080	363410	1477500	732970	731640	1691500	729990	706500	441290	2210800	0.521467	0.65604	-0.241891	TB-EOT	Non significant
P14384	P14384	>SP|P14384|CBPM_HUMAN Carboxypeptidase M OS=Homo sapiens OX=9606 GN=CPM PE=1 SV=2	CPM	5	1	64150	55235	110710	186960	127600	274890	31837	60368	74647	161980	0.744072	0.829717	0.131513	TB-EOT	Non significant
P14550	P14550	>SP|P14550|AK1A1_HUMAN Alcohol dehydrogenase [NADP(+)] OS=Homo sapiens OX=9606 GN=AKR1A1 PE=1 SV=3	AKR1A1	16	1	1501000	564660	3656100	1632500	3301300	3368600	1160700	1688200	4726300	5114900	0.0998253	0.22494	0.607065	TB-EOT	Non significant
P14598	P14598;A6NI72;A8MVU1;P14598-2	>SP|P14598|NCF1_HUMAN Neutrophil cytosol factor 1 OS=Homo sapiens OX=9606 GN=NCF1 PE=1 SV=4;>SP|A6NI72|NCF1B_HUMAN Putative neutrophil cytosol factor 1B OS=Homo sapiens OX=9606 GN=NCF1B PE=5 SV=2;>SP|A8MVU1|NCF1C_HUMAN Putative neutrophil cytosol factor 1C OS	NCF1;NCF1B;NCF1C	8;8;6;5	4	77558	94101	485660	102880	351260	363730	41294	90019	185800	666740	0.103594	0.230361	-0.681891	TB-EOT	Non significant
P14618	P14618;P14618-3;P30613-2;P30613	>SP|P14618|KPYM_HUMAN Pyruvate kinase PKM OS=Homo sapiens OX=9606 GN=PKM PE=1 SV=4;>SP|P14618-3|KPYM_HUMAN Isoform 3 of Pyruvate kinase PKM OS=Homo sapiens OX=9606 GN=PKM	PKM	3;3;0;0	4	766350	2615600	12148000	3667900	5349800	11829000	807550	2173900	5150700	18577000	0.00799937	0.0453994	-1.15383	TB-EOT	Downregulated
P14625	P14625;Q58FF3	>SP|P14625|ENPL_HUMAN Endoplasmin OS=Homo sapiens OX=9606 GN=HSP90B1 PE=1 SV=1	HSP90B1	23;6	2	1085400	2580400	8967300	3204700	1738600	6277600	2615400	2675900	3527900	10861000	0.10916	0.238211	-0.594844	TB-EOT	Non significant
P14735	P14735;P14735-2	>SP|P14735|IDE_HUMAN Insulin-degrading enzyme OS=Homo sapiens OX=9606 GN=IDE PE=1 SV=4	IDE	8;3	2	31241	87520	524280	163940	157690	448310	107760	118350	113990	408820	0.0636491	0.169249	-0.702556	TB-EOT	Non significant
P14780	P14780	>SP|P14780|MMP9_HUMAN Matrix metalloproteinase-9 OS=Homo sapiens OX=9606 GN=MMP9 PE=1 SV=3	MMP9	23	1	9227800	354440	2845800	385300	24110000	751060	899290	1800900	9224600	705290	0.0189147	0.0771304	2.80386	TB-EOT	Non significant
P14868-2	P14868-2;P14868	>SP|P14868-2|SYDC_HUMAN Isoform 2 of Aspartate--tRNA ligase, cytoplasmic OS=Homo sapiens OX=9606 GN=DARS;>SP|P14868|SYDC_HUMAN Aspartate--tRNA ligase, cytoplasmic OS=Homo sapiens OX=9606 GN=DARS PE=1 SV=2	DARS	5;5	2	19248	44253	111340	66368	72094	93174	39458	44305	85471	133840	0.99308	0.994387	0.00246919	TB-EOT	Non significant
P14902	P14902	>SP|P14902|I23O1_HUMAN Indoleamine 2,3-dioxygenase 1 OS=Homo sapiens OX=9606 GN=IDO1 PE=1 SV=1	IDO1	4	1	66785	14150	75158	32297	457570	22883	194250	41447	70309	43652	0.00722695	0.0429473	2.35653	TB-EOT	Upregulated
P14923	P14923;P35222	>SP|P14923|PLAK_HUMAN Junction plakoglobin OS=Homo sapiens OX=9606 GN=JUP PE=1 SV=3;>SP|P35222|CTNB1_HUMAN Catenin beta-1 OS=Homo sapiens OX=9606 GN=CTNNB1 PE=1 SV=1	JUP;CTNNB1	2;1	2	11027	14753	46998	40566	18836	25347	24981	31339	31250	21989	0.0689155	0.178816	0.820537	TB-EOT	Non significant
P15090	P15090	>SP|P15090|FABP4_HUMAN Fatty acid-binding protein, adipocyte OS=Homo sapiens OX=9606 GN=FABP4 PE=1 SV=3	FABP4	5	1	2687700	1272000	3354700	1825900	1586100	2578000	568430	474300	356210	6118000	0.298556	0.463372	-0.730771	TB-EOT	Non significant
P15104	P15104	>SP|P15104|GLNA_HUMAN Glutamine synthetase OS=Homo sapiens OX=9606 GN=GLUL PE=1 SV=4	GLUL	10	1	206220	513590	1447600	794730	813050	1990800	237290	453930	599790	3660400	0.0101984	0.0531224	-0.895412	TB-EOT	Non significant
P15121	P15121	>SP|P15121|ALDR_HUMAN Aldose reductase OS=Homo sapiens OX=9606 GN=AKR1B1 PE=1 SV=3	AKR1B1	12	1	691770	1461800	7284700	2480100	3603300	7865200	796640	1842400	1630900	14428000	0.00902988	0.0492274	-1.05449	TB-EOT	Downregulated
P15144	P15144	>SP|P15144|AMPN_HUMAN Aminopeptidase N OS=Homo sapiens OX=9606 GN=ANPEP PE=1 SV=4	ANPEP	21	1	863820	612530	1656100	1303300	3010100	3191900	760200	904160	1402800	2856800	0.318043	0.484302	0.339681	TB-EOT	Non significant
P15151-3	P15151-3;P15151-2;P15151-4;P15151	>SP|P15151-3|PVR_HUMAN Isoform Gamma of Poliovirus receptor OS=Homo sapiens OX=9606 GN=PVR;>SP|P15151-2|PVR_HUMAN Isoform Beta of Poliovirus receptor OS=Homo sapiens OX=9606 GN=PVR;>SP|P15151-4|PVR_HUMAN Isoform Delta of Poliovirus receptor OS=Homo sapiens OX	PVR	3;3;3;3	4	62984	22151	68054	167110	95034	109030	19700	49801	70273	66294	0.0318156	0.107537	1.01387	TB-EOT	Non significant
P15170	P15170;P15170-2;P15170-3;Q8IYD1	>SP|P15170|ERF3A_HUMAN Eukaryotic peptide chain release factor GTP-binding subunit ERF3A OS=Homo sapiens OX=9606 GN=GSPT1 PE=1 SV=1;>SP|P15170-2|ERF3A_HUMAN Isoform 2 of Eukaryotic peptide chain release factor GTP-binding subunit ERF3A OS=Homo sapiens OX=960	GSPT1;GSPT2	8;8;8;4	4	87028	178280	759280	294150	260330	668830	174890	251320	351610	901450	0.117391	0.250291	-0.446421	TB-EOT	Non significant
P15289	P15289;P15289-2	>SP|P15289|ARSA_HUMAN Arylsulfatase A OS=Homo sapiens OX=9606 GN=ARSA PE=1 SV=3;>SP|P15289-2|ARSA_HUMAN Isoform 2 of Arylsulfatase A OS=Homo sapiens OX=9606 GN=ARSA	ARSA	4;4	2	224830	85857	210060	118650	202200	234690	32046	47652	336050	579600	0.929838	0.956891	-0.0520044	TB-EOT	Non significant
P15311	P15311	>SP|P15311|EZRI_HUMAN Ezrin OS=Homo sapiens OX=9606 GN=EZR PE=1 SV=4	EZR	20	1	2930600	2043700	15277000	7976500	7222800	20871000	3597900	5453200	9577100	16701000	0.992629	0.994387	-0.00286834	TB-EOT	Non significant
P15328	P15328	>SP|P15328|FOLR1_HUMAN Folate receptor alpha OS=Homo sapiens OX=9606 GN=FOLR1 PE=1 SV=3	FOLR1	5	1	579920	430830	1417000	1521600	1136900	2948200	78407	348240	1760400	2002300	0.586345	0.709492	-0.334067	TB-EOT	Non significant
P15374	P15374	>SP|P15374|UCHL3_HUMAN Ubiquitin carboxyl-terminal hydrolase isozyme L3 OS=Homo sapiens OX=9606 GN=UCHL3 PE=1 SV=1	UCHL3	3	1	28160	50172	153450	170570	136590	261990	81428	88320	166580	249160	0.502046	0.637405	0.217113	TB-EOT	Non significant
P15498-2	P15498-2;P15498;Q9UKW4-2;Q9UKW4;Q9UKW4-4	>SP|P15498-2|VAV_HUMAN Isoform 2 of Proto-oncogene vav OS=Homo sapiens OX=9606 GN=VAV1;>SP|P15498|VAV_HUMAN Proto-oncogene vav OS=Homo sapiens OX=9606 GN=VAV1 PE=1 SV=4;>SP|Q9UKW4-2|VAV3_HUMAN Isoform 2 of Guanine nucleotide exchange factor VAV3 OS=Homo sapie	VAV1;VAV3	2;2;1;1;1	5	1053	5945.3	43118	9661.6	24927	45876	4974	7240.2	8070.2	71033	0.0221069	0.0849106	-1.36576	TB-EOT	Non significant
P15529-16	P15529-16;P15529-15;P15529-9;P15529-7;P15529-12;P15529-14;P15529-8;P15529-4;P15529-6;P15529-11;P15529-13;P15529-3;P15529-5;P15529-10;P15529;P15529-2	>SP|P15529-16|MCP_HUMAN Isoform 3 of Membrane cofactor protein OS=Homo sapiens OX=9606 GN=CD46;>SP|P15529-15|MCP_HUMAN Isoform K of Membrane cofactor protein OS=Homo sapiens OX=9606 GN=CD46;>SP|P15529-9|MCP_HUMAN Isoform N of Membrane cofactor protein OS=Homo	CD46	2;2;2;2;2;2;2;2;2;2;2;2;2;2;2;2	16	94136	74818	109070	138080	113100	218570	73677	62166	188220	175380	0.183051	0.334239	0.502994	TB-EOT	Non significant
P15559-3	P15559-3;P15559-2;P15559	>SP|P15559-3|NQO1_HUMAN Isoform 3 of NAD(P)H dehydrogenase [quinone] 1 OS=Homo sapiens OX=9606 GN=NQO1;>SP|P15559-2|NQO1_HUMAN Isoform 2 of NAD(P)H dehydrogenase [quinone] 1 OS=Homo sapiens OX=9606 GN=NQO1;>SP|P15559|NQO1_HUMAN NAD(P)H dehydrogenase [quinone]	NQO1	7;7;7	3	245770	620920	1812100	923640	1102900	3212400	271630	561400	3343200	2169000	0.399993	0.548593	-0.380338	TB-EOT	Non significant
P15586-2	P15586-2;P15586	>SP|P15586-2|GNS_HUMAN Isoform 2 of N-acetylglucosamine-6-sulfatase OS=Homo sapiens OX=9606 GN=GNS;>SP|P15586|GNS_HUMAN N-acetylglucosamine-6-sulfatase OS=Homo sapiens OX=9606 GN=GNS PE=1 SV=3	GNS	7;7	2	435490	184470	515330	392910	533130	1054800	81079	154020	550810	2071100	0.509812	0.643506	-0.34878	TB-EOT	Non significant
P15848	P15848;P15848-2	>SP|P15848|ARSB_HUMAN Arylsulfatase B OS=Homo sapiens OX=9606 GN=ARSB PE=1 SV=1;>SP|P15848-2|ARSB_HUMAN Isoform 2 of Arylsulfatase B OS=Homo sapiens OX=9606 GN=ARSB	ARSB	2;1	2	24430	37947	56578	22133	35382	123700	2945.9	10819	35069	317060	0.0155546	0.0689751	-1.66617	TB-EOT	Non significant
P15880	P15880	>SP|P15880|RS2_HUMAN 40S ribosomal protein S2 OS=Homo sapiens OX=9606 GN=RPS2 PE=1 SV=2	RPS2	6	1	44639	594940	637170	270740	218380	1736500	61101	231440	297370	2724700	0.000408548	0.00786755	-2.09658	TB-EOT	Downregulated
P15907	P15907;P15907-2	>SP|P15907|SIAT1_HUMAN Beta-galactoside alpha-2,6-sialyltransferase 1 OS=Homo sapiens OX=9606 GN=ST6GAL1 PE=1 SV=1	ST6GAL1	4;1	2	28729	31636	213600	99262	227780	252310	66158	61801	320040	225810	0.444918	0.589477	0.332045	TB-EOT	Non significant
P15924-2	P15924-2;P15924-3;P15924	>SP|P15924-2|DESP_HUMAN Isoform DPII of Desmoplakin OS=Homo sapiens OX=9606 GN=DSP;>SP|P15924-3|DESP_HUMAN Isoform DSPIa of Desmoplakin OS=Homo sapiens OX=9606 GN=DSP;>SP|P15924|DESP_HUMAN Desmoplakin OS=Homo sapiens OX=9606 GN=DSP PE=1 SV=3	DSP	2;2;2	3	5848.9	7793.1	14423	12457	9671.6	12074	6746.8	5261.3	7733.9	11841	0.449594	0.592849	0.291272	TB-EOT	Non significant
P15941-7	P15941-7;P15941-11;P15941-8;P15941-4;P15941-3;P15941;P15941-2;P15941-17;P15941-15;P15941-6;P15941-12;P15941-16;P15941-9;P15941-10;P15941-13	>SP|P15941-7|MUC1_HUMAN Isoform Y of Mucin-1 OS=Homo sapiens OX=9606 GN=MUC1;>SP|P15941-11|MUC1_HUMAN Isoform Y-LSP of Mucin-1 OS=Homo sapiens OX=9606 GN=MUC1;>SP|P15941-8|MUC1_HUMAN Isoform 8 of Mucin-1 OS=Homo sapiens OX=9606 GN=MUC1;>SP|P15941-4|MUC1_HUMAN	MUC1	7;7;7;7;7;7;7;6;5;5;4;4;4;4;3	15	1014000	415230	1576700	1935700	2182600	3025400	559300	924480	3365900	2058800	0.0315745	0.107525	0.833451	TB-EOT	Non significant
P16050-2	P16050-2;P16050	>SP|P16050-2|LOX15_HUMAN Isoform 2 of Arachidonate 15-lipoxygenase OS=Homo sapiens OX=9606 GN=ALOX15;>SP|P16050|LOX15_HUMAN Arachidonate 15-lipoxygenase OS=Homo sapiens OX=9606 GN=ALOX15 PE=1 SV=3	ALOX15	10;10	2	158430	423710	1207100	498310	761890	2662900	259180	383010	984730	1387200	0.0883101	0.205621	-0.607126	TB-EOT	Non significant
P16070-8	P16070-8;P16070-4;P16070-3;P16070-7;P16070-5;P16070;P16070-18;P16070-12;P16070-14;P16070-13;P16070-11;P16070-10;P16070-16;P16070-17;P16070-6;P16070-9;P16070-15;P16070-19	>SP|P16070-8|CD44_HUMAN Isoform 8 of CD44 antigen OS=Homo sapiens OX=9606 GN=CD44;>SP|P16070-4|CD44_HUMAN Isoform 4 of CD44 antigen OS=Homo sapiens OX=9606 GN=CD44;>SP|P16070-3|CD44_HUMAN Isoform 3 of CD44 antigen OS=Homo sapiens OX=9606 GN=CD44;>SP|P16070-7|C	CD44	11;11;11;11;11;11;10;10;10;10;10;10;10;10;10;7;6;3	18	2931400	3003900	4133700	7308000	3056600	11850000	158840	1085500	1204800	8965800	0.180713	0.331163	-1.1064	TB-EOT	Non significant
P16083	P16083	>SP|P16083|NQO2_HUMAN Ribosyldihydronicotinamide dehydrogenase [quinone] OS=Homo sapiens OX=9606 GN=NQO2 PE=1 SV=5	NQO2	7	1	1004100	344320	267790	243510	685290	1284700	194670	246920	548970	1598600	0.814337	0.880573	0.153997	TB-EOT	Non significant
P16150	P16150	>SP|P16150|LEUK_HUMAN Leukosialin OS=Homo sapiens OX=9606 GN=SPN PE=1 SV=1	SPN	5	1	134070	165880	249900	129300	145650	402090	65428	100100	143820	970750	0.0753298	0.190893	-0.768864	TB-EOT	Non significant
P16152	P16152;P16152-2	>SP|P16152|CBR1_HUMAN Carbonyl reductase [NADPH] 1 OS=Homo sapiens OX=9606 GN=CBR1 PE=1 SV=3	CBR1	7;2	2	53124	285930	1579400	478450	482140	2842300	37799	281790	536370	1032600	0.0191836	0.077176	-1.54461	TB-EOT	Non significant
P16278-3	P16278-3;P16278;P16278-2	>SP|P16278-3|BGAL_HUMAN Isoform 3 of Beta-galactosidase OS=Homo sapiens OX=9606 GN=GLB1;>SP|P16278|BGAL_HUMAN Beta-galactosidase OS=Homo sapiens OX=9606 GN=GLB1 PE=1 SV=2;>SP|P16278-2|BGAL_HUMAN Isoform 2 of Beta-galactosidase OS=Homo sapiens OX=9606 GN=GLB1	GLB1	9;9;8	3	223230	321510	358300	361130	211090	1015800	148070	198710	389970	4102800	0.0963048	0.22027	-0.93173	TB-EOT	Non significant
P16401	P16401	>SP|P16401|H15_HUMAN Histone H1.5 OS=Homo sapiens OX=9606 GN=HIST1H1B PE=1 SV=3	HIST1H1B	4	1	155840	111870	257630	110250	776400	322130	73967	271820	201650	383090	0.304542	0.46836	0.528751	TB-EOT	Non significant
P16403	P16403;P10412;P16402;Q02539;P22492	>SP|P16403|H12_HUMAN Histone H1.2 OS=Homo sapiens OX=9606 GN=HIST1H1C PE=1 SV=2;>SP|P10412|H14_HUMAN Histone H1.4 OS=Homo sapiens OX=9606 GN=HIST1H1E PE=1 SV=2;>SP|P16402|H13_HUMAN Histone H1.3 OS=Homo sapiens OX=9606 GN=HIST1H1D PE=1 SV=2;>SP|Q02539|H11_HUMAN	HIST1H1C;HIST1H1E;HIST1H1D;HIST1H1A	3;3;3;1;1	5	465530	89483	349840	193000	1483100	1363400	153840	341860	292590	1708300	0.639056	0.747121	0.313467	TB-EOT	Non significant
P16435	P16435	>SP|P16435|NCPR_HUMAN NADPH--cytochrome P450 reductase OS=Homo sapiens OX=9606 GN=POR PE=1 SV=2	POR	4	1	8172.9	32313	72771	40788	21746	80015	20191	21077	21292	348250	0.00997278	0.0526687	-1.30585	TB-EOT	Non significant
P16671-4	P16671-4;P16671;P16671-2;P16671-3	>SP|P16671-4|CD36_HUMAN Isoform 4 of Platelet glycoprotein 4 OS=Homo sapiens OX=9606 GN=CD36;>SP|P16671|CD36_HUMAN Platelet glycoprotein 4 OS=Homo sapiens OX=9606 GN=CD36 PE=1 SV=2;>SP|P16671-2|CD36_HUMAN Isoform 2 of Platelet glycoprotein 4 OS=Homo sapiens O	CD36	4;4;3;3	4	74701	197320	256370	349060	117230	1328800	15282	136950	74922	437200	0.0560722	0.155477	-1.36926	TB-EOT	Non significant
P16870-2	P16870-2;P16870	>SP|P16870-2|CBPE_HUMAN Isoform 2 of Carboxypeptidase E OS=Homo sapiens OX=9606 GN=CPE;>SP|P16870|CBPE_HUMAN Carboxypeptidase E OS=Homo sapiens OX=9606 GN=CPE PE=1 SV=1	CPE	3;3	2	27596	15820	72750	87194	149430	43020	14668	36171	310400	35663	0.0109547	0.0550408	1.63359	TB-EOT	Non significant
P16930-2	P16930-2;P16930	>SP|P16930-2|FAAA_HUMAN Isoform 2 of Fumarylacetoacetase OS=Homo sapiens OX=9606 GN=FAH;>SP|P16930|FAAA_HUMAN Fumarylacetoacetase OS=Homo sapiens OX=9606 GN=FAH PE=1 SV=2	FAH	4;4	2	195030	125220	482610	227760	406750	669530	128040	125970	724240	758850	0.83737	0.896796	0.0786906	TB-EOT	Non significant
P16949	P16949;P16949-2;Q93045;Q93045-2	>SP|P16949|STMN1_HUMAN Stathmin OS=Homo sapiens OX=9606 GN=STMN1 PE=1 SV=3;>SP|P16949-2|STMN1_HUMAN Isoform 2 of Stathmin OS=Homo sapiens OX=9606 GN=STMN1	STMN1	4;4;1;1	4	122650	34399	136580	109920	98556	136020	44112	62371	179680	159720	0.0652887	0.172104	0.748899	TB-EOT	Non significant
P17050	P17050	>SP|P17050|NAGAB_HUMAN Alpha-N-acetylgalactosaminidase OS=Homo sapiens OX=9606 GN=NAGA PE=1 SV=2	NAGA	4	1	67817	100740	112760	170140	150040	228360	93493	123370	157260	432860	0.46848	0.607985	0.260214	TB-EOT	Non significant
P17096	P17096;P17096-3;P17096-2	>SP|P17096|HMGA1_HUMAN High mobility group protein HMG-I/HMG-Y OS=Homo sapiens OX=9606 GN=HMGA1 PE=1 SV=3;>SP|P17096-3|HMGA1_HUMAN Isoform HMG-R of High mobility group protein HMG-I/HMG-Y OS=Homo sapiens OX=9606 GN=HMGA1;>SP|P17096-2|HMGA1_HUMAN Isoform HMG-Y	HMGA1	2;2;1	3	195920	67298	422800	93715	427560	142860	70627	108630	184950	196050	0.201033	0.352982	0.688336	TB-EOT	Non significant
P17174	P17174;P17174-2	>SP|P17174|AATC_HUMAN Aspartate aminotransferase, cytoplasmic OS=Homo sapiens OX=9606 GN=GOT1 PE=1 SV=3;>SP|P17174-2|AATC_HUMAN Isoform 2 of Aspartate aminotransferase, cytoplasmic OS=Homo sapiens OX=9606 GN=GOT1	GOT1	7;6	2	142980	163410	598280	479120	521750	602580	280850	265240	416050	723700	0.192669	0.34517	0.35895	TB-EOT	Non significant
P17655	P17655;P17655-2	>SP|P17655|CAN2_HUMAN Calpain-2 catalytic subunit OS=Homo sapiens OX=9606 GN=CAPN2 PE=1 SV=6;>SP|P17655-2|CAN2_HUMAN Isoform 2 of Calpain-2 catalytic subunit OS=Homo sapiens OX=9606 GN=CAPN2	CAPN2	12;11	2	244610	1034200	2513600	2524800	1549300	3631800	652510	1861300	2385000	2940500	0.818446	0.883504	-0.0962891	TB-EOT	Non significant
P17858	P17858;P17858-2	>SP|P17858|PFKAL_HUMAN ATP-dependent 6-phosphofructokinase, liver type OS=Homo sapiens OX=9606 GN=PFKL PE=1 SV=6;>SP|P17858-2|PFKAL_HUMAN Isoform 2 of ATP-dependent 6-phosphofructokinase, liver type OS=Homo sapiens OX=9606 GN=PFKL	PFKL	9;9	2	43033	172100	648090	182870	298210	516870	100410	173260	214120	802780	0.0198719	0.0783904	-0.834895	TB-EOT	Non significant
P17900	P17900	>SP|P17900|SAP3_HUMAN Ganglioside GM2 activator OS=Homo sapiens OX=9606 GN=GM2A PE=1 SV=4	GM2A	4	1	2114700	1816200	2303200	2110200	1500000	8998900	17838	474210	576370	7932100	0.083388	0.199423	-2.02106	TB-EOT	Non significant
P17931	P17931	>SP|P17931|LEG3_HUMAN Galectin-3 OS=Homo sapiens OX=9606 GN=LGALS3 PE=1 SV=5	LGALS3	11	1	1485900	1330200	7341300	2986200	2620500	7493200	1413700	1269600	1596700	8932300	0.0770866	0.192529	-0.637655	TB-EOT	Non significant
P17980	P17980	>SP|P17980|PRS6A_HUMAN 26S proteasome regulatory subunit 6A OS=Homo sapiens OX=9606 GN=PSMC3 PE=1 SV=3	PSMC3	4	1	17787	38075	199490	74447	69274	126130	38728	53406	76620	177370	0.239323	0.39739	-0.351233	TB-EOT	Non significant
P17987	P17987	>SP|P17987|TCPA_HUMAN T-complex protein 1 subunit alpha OS=Homo sapiens OX=9606 GN=TCP1 PE=1 SV=1	TCP1	7	1	47247	63414	356540	153080	177330	270900	66338	116850	199180	352390	0.748721	0.833068	-0.0863456	TB-EOT	Non significant
P18065	P18065	>SP|P18065|IBP2_HUMAN Insulin-like growth factor-binding protein 2 OS=Homo sapiens OX=9606 GN=IGFBP2 PE=1 SV=2	IGFBP2	2	1	33140	43303	94537	92120	96099	138220	31355	34960	90703	171110	0.947713	0.970035	0.0190998	TB-EOT	Non significant
P18077	P18077	>SP|P18077|RL35A_HUMAN 60S ribosomal protein L35a OS=Homo sapiens OX=9606 GN=RPL35A PE=1 SV=2	RPL35A	2	1	73614	128690	140110	106360	82613	364740	40317	77991	81587	632880	0.0437124	0.131396	-0.919352	TB-EOT	Non significant
P18085	P18085	>SP|P18085|ARF4_HUMAN ADP-ribosylation factor 4 OS=Homo sapiens OX=9606 GN=ARF4 PE=1 SV=3	ARF4	3	1	16349	35773	261150	72864	134360	166880	39301	83528	249140	205080	0.908919	0.94211	-0.0507615	TB-EOT	Non significant
P18124	P18124	>SP|P18124|RL7_HUMAN 60S ribosomal protein L7 OS=Homo sapiens OX=9606 GN=RPL7 PE=1 SV=1	RPL7	6	1	50853	351040	392800	181490	134350	1036500	141750	228720	110520	1556500	0.0045251	0.0311433	-1.56389	TB-EOT	Downregulated
P18206-2	P18206-2;P18206;P18206-3	>SP|P18206-2|VINC_HUMAN Isoform 1 of Vinculin OS=Homo sapiens OX=9606 GN=VCL;>SP|P18206|VINC_HUMAN Vinculin OS=Homo sapiens OX=9606 GN=VCL PE=1 SV=4	VCL	43;43;7	3	3230400	953820	6375200	3769800	8373400	5573600	2343100	3633100	4155600	7649700	0.0317416	0.107525	0.822227	TB-EOT	Non significant
P18428	P18428	>SP|P18428|LBP_HUMAN Lipopolysaccharide-binding protein OS=Homo sapiens OX=9606 GN=LBP PE=1 SV=3	LBP	2	1	3522.8	24755	19500	25332	67942	11559	15579	41306	18603	15751	0.12757	0.264713	1.10369	TB-EOT	Non significant
P18440	P18440	>SP|P18440|ARY1_HUMAN Arylamine N-acetyltransferase 1 OS=Homo sapiens OX=9606 GN=NAT1 PE=1 SV=2	NAT1	2	1	9242	7845.2	40269	27317	19111	36572	16324	10051	23357	31817	0.417754	0.563953	0.258769	TB-EOT	Non significant
P18621-2	P18621-2;P18621;P18621-3	>SP|P18621-2|RL17_HUMAN Isoform 2 of 60S ribosomal protein L17 OS=Homo sapiens OX=9606 GN=RPL17;>SP|P18621|RL17_HUMAN 60S ribosomal protein L17 OS=Homo sapiens OX=9606 GN=RPL17 PE=1 SV=3;>SP|P18621-3|RL17_HUMAN Isoform 3 of 60S ribosomal protein L17 OS=Homo s	RPL17	3;3;3	3	18445	198870	264240	76733	44803	394830	12956	49843	46797	752150	3.13463e-05	0.00374789	-2.46871	TB-EOT	Downregulated
P18669	P18669;P15259;Q8N0Y7	>SP|P18669|PGAM1_HUMAN Phosphoglycerate mutase 1 OS=Homo sapiens OX=9606 GN=PGAM1 PE=1 SV=2	PGAM1	9;4;3	3	352580	1441800	6149400	1975300	2422600	4498700	3171200	2685400	1391500	8069300	0.33679	0.497337	-0.504978	TB-EOT	Non significant
P19021-2	P19021-2;P19021-4;P19021-3;P19021-6;P19021;P19021-5	>SP|P19021-2|AMD_HUMAN Isoform 2 of Peptidyl-glycine alpha-amidating monooxygenase OS=Homo sapiens OX=9606 GN=PAM;>SP|P19021-4|AMD_HUMAN Isoform 4 of Peptidyl-glycine alpha-amidating monooxygenase OS=Homo sapiens OX=9606 GN=PAM;>SP|P19021-3|AMD_HUMAN Isoform	PAM	8;8;8;8;8;8	6	460270	75949	573400	476710	611410	437060	139570	207280	1364900	250820	0.00852648	0.0473313	1.5249	TB-EOT	Upregulated
P19075	P19075	>SP|P19075|TSN8_HUMAN Tetraspanin-8 OS=Homo sapiens OX=9606 GN=TSPAN8 PE=1 SV=1	TSPAN8	2	1	140550	69069	344500	64769	170290	552490	123530	65365	772580	306760	0.907968	0.942032	0.0695261	TB-EOT	Non significant
P19105	P19105;O14950;P24844;P24844-2	>SP|P19105|ML12A_HUMAN Myosin regulatory light chain 12A OS=Homo sapiens OX=9606 GN=MYL12A PE=1 SV=2;>SP|O14950|ML12B_HUMAN Myosin regulatory light chain 12B OS=Homo sapiens OX=9606 GN=MYL12B PE=1 SV=2;>SP|P24844|MYL9_HUMAN Myosin regulatory light polypeptide	MYL12A;MYL12B;MYL9	8;8;5;3	4	482370	131160	777560	350760	1172300	563190	174400	245560	1185000	997050	0.113016	0.24348	0.783151	TB-EOT	Non significant
P19338	P19338	>SP|P19338|NUCL_HUMAN Nucleolin OS=Homo sapiens OX=9606 GN=NCL PE=1 SV=3	NCL	13	1	1669300	640610	1833100	884250	1211500	1611200	731980	642320	4412100	1721000	0.151523	0.296693	0.746761	TB-EOT	Non significant
P19367-4	P19367-4;P19367-2;P19367;P19367-3;Q2TB90	>SP|P19367-4|HXK1_HUMAN Isoform 4 of Hexokinase-1 OS=Homo sapiens OX=9606 GN=HK1;>SP|P19367-2|HXK1_HUMAN Isoform 2 of Hexokinase-1 OS=Homo sapiens OX=9606 GN=HK1;>SP|P19367|HXK1_HUMAN Hexokinase-1 OS=Homo sapiens OX=9606 GN=HK1 PE=1 SV=3;>SP|P19367-3|HXK1_HUMA	HK1	21;21;21;21;2	5	218950	614830	1450700	760780	735300	4386100	324570	568650	548330	7662500	0.00338695	0.0255027	-1.42477	TB-EOT	Downregulated
P19474-2	P19474-2;P19474	>SP|P19474-2|RO52_HUMAN Isoform 2 of E3 ubiquitin-protein ligase TRIM21 OS=Homo sapiens OX=9606 GN=TRIM21;>SP|P19474|RO52_HUMAN E3 ubiquitin-protein ligase TRIM21 OS=Homo sapiens OX=9606 GN=TRIM21 PE=1 SV=1	TRIM21	2;2	2	3089.4	9171.5	15561	8817.5	13255	26397	4579.9	7967.2	9367.8	49140	0.0472657	0.138277	-0.698314	TB-EOT	Non significant
P19652	P19652	>SP|P19652|A1AG2_HUMAN Alpha-1-acid glycoprotein 2 OS=Homo sapiens OX=9606 GN=ORM2 PE=1 SV=2	ORM2	5	1	18073000	4134200	7792900	15557000	13821000	3992700	8574200	11093000	7853300	4398000	0.00158183	0.0169813	2.14951	TB-EOT	Upregulated
P19823	P19823;CON__Q9TRI1	>SP|P19823|ITIH2_HUMAN Inter-alpha-trypsin inhibitor heavy chain H2 OS=Homo sapiens OX=9606 GN=ITIH2 PE=1 SV=2	ITIH2	24;7	2	498520	3957000	8244400	15662000	11025000	3319600	9825600	23487000	6863400	3996500	0.0854374	0.203047	1.51077	TB-EOT	Non significant
P19827	P19827;P19827-2;P19827-3;CON__Q0VCM5	>SP|P19827|ITIH1_HUMAN Inter-alpha-trypsin inhibitor heavy chain H1 OS=Homo sapiens OX=9606 GN=ITIH1 PE=1 SV=3;>SP|P19827-2|ITIH1_HUMAN Isoform 2 of Inter-alpha-trypsin inhibitor heavy chain H1 OS=Homo sapiens OX=9606 GN=ITIH1	ITIH1	13;10;6;2	4	138880	672880	1740700	3180400	2799300	781720	2033100	4806000	1093900	977510	0.0632089	0.168762	1.51804	TB-EOT	Non significant
P19878	P19878;P19878-3;P19878-4;P19878-2;Q15776-2;Q15776	>SP|P19878|NCF2_HUMAN Neutrophil cytosol factor 2 OS=Homo sapiens OX=9606 GN=NCF2 PE=1 SV=2;>SP|P19878-3|NCF2_HUMAN Isoform 3 of Neutrophil cytosol factor 2 OS=Homo sapiens OX=9606 GN=NCF2;>SP|P19878-4|NCF2_HUMAN Isoform 4 of Neutrophil cytosol factor 2 OS=Ho	NCF2	19;17;15;14;1;1	6	332900	552260	2690000	626360	955530	2663000	189740	437120	628540	4129500	0.00155094	0.0168499	-1.24835	TB-EOT	Downregulated
P19971	P19971;P19971-2;P9WFS1	>SP|P19971|TYPH_HUMAN Thymidine phosphorylase OS=Homo sapiens OX=9606 GN=TYMP PE=1 SV=2;>SP|P19971-2|TYPH_HUMAN Isoform 2 of Thymidine phosphorylase OS=Homo sapiens OX=9606 GN=TYMP	TYMP	16;14;1	3	476850	581740	3542800	1885900	2926700	2636200	555720	854190	526170	5233200	0.33831	0.498132	-0.450894	TB-EOT	Non significant
P20036	P20036	>SP|P20036|DPA1_HUMAN HLA class II histocompatibility antigen, DP alpha 1 chain OS=Homo sapiens OX=9606 GN=HLA-DPA1 PE=1 SV=1	HLA-DPA1	2	1	238260	324220	396810	548270	482330	888100	44437	127690	272220	1226200	0.246744	0.405726	-0.654938	TB-EOT	Non significant
P20042	P20042	>SP|P20042|IF2B_HUMAN Eukaryotic translation initiation factor 2 subunit 2 OS=Homo sapiens OX=9606 GN=EIF2S2 PE=1 SV=2	EIF2S2	6	1	274950	86665	505150	82875	99020	231610	56878	71878	188870	324490	0.633479	0.743231	-0.269192	TB-EOT	Non significant
P20061	P20061	>SP|P20061|TCO1_HUMAN Transcobalamin-1 OS=Homo sapiens OX=9606 GN=TCN1 PE=1 SV=2	TCN1	12	1	2603100	97137	1085600	724160	1362500	368250	230700	221190	7508800	263280	0.0139148	0.0644361	2.50647	TB-EOT	Non significant
P20073-2	P20073-2;P20073	>SP|P20073-2|ANXA7_HUMAN Isoform 2 of Annexin A7 OS=Homo sapiens OX=9606 GN=ANXA7;>SP|P20073|ANXA7_HUMAN Annexin A7 OS=Homo sapiens OX=9606 GN=ANXA7 PE=1 SV=3	ANXA7	13;13	2	1961900	576240	2418600	1595600	2140300	3151600	1610700	1196300	1221300	3391400	0.205257	0.357613	0.546268	TB-EOT	Non significant
P20142	P20142;P20142-2	>SP|P20142|PEPC_HUMAN Gastricsin OS=Homo sapiens OX=9606 GN=PGC PE=1 SV=1;>SP|P20142-2|PEPC_HUMAN Isoform 2 of Gastricsin OS=Homo sapiens OX=9606 GN=PGC	PGC	2;1	2	7190	20519	31924	257000	136300	48520	9375.9	22753	15883	60956	0.46111	0.60409	0.580699	TB-EOT	Non significant
P20290-2	P20290-2;P20290	>SP|P20290-2|BTF3_HUMAN Isoform 2 of Transcription factor BTF3 OS=Homo sapiens OX=9606 GN=BTF3;>SP|P20290|BTF3_HUMAN Transcription factor BTF3 OS=Homo sapiens OX=9606 GN=BTF3 PE=1 SV=1	BTF3	2;2	2	35162	70431	210350	118500	113810	325720	63670	73635	93545	226850	0.186649	0.338774	-0.383351	TB-EOT	Non significant
P20340-2	P20340-2;P20340;P20340-4;Q9NRW1;Q9NRW1-2;Q53S08;P20340-3;Q14964	>SP|P20340-2|RAB6A_HUMAN Isoform 2 of Ras-related protein Rab-6A OS=Homo sapiens OX=9606 GN=RAB6A;>SP|P20340|RAB6A_HUMAN Ras-related protein Rab-6A OS=Homo sapiens OX=9606 GN=RAB6A PE=1 SV=3;>SP|P20340-4|RAB6A_HUMAN Isoform 4 of Ras-related protein Rab-6A OS=	RAB6A;RAB6B	4;4;3;3;2;1;1;1	8	167290	240790	739500	311370	488950	768530	207730	210120	705650	1190900	0.482928	0.621433	-0.207665	TB-EOT	Non significant
P20591	P20591;P20591-2;P20592-2;P20592	>SP|P20591|MX1_HUMAN Interferon-induced GTP-binding protein Mx1 OS=Homo sapiens OX=9606 GN=MX1 PE=1 SV=4;>SP|P20591-2|MX1_HUMAN Isoform 2 of Interferon-induced GTP-binding protein Mx1 OS=Homo sapiens OX=9606 GN=MX1	MX1	4;3;1;1	4	195860	364400	297560	235160	249090	304040	263170	252770	238020	285290	0.365443	0.523112	0.469337	TB-EOT	Non significant
P20618	P20618	>SP|P20618|PSB1_HUMAN Proteasome subunit beta type-1 OS=Homo sapiens OX=9606 GN=PSMB1 PE=1 SV=2	PSMB1	9	1	293500	681140	3422200	1406400	745280	3547900	1476000	979970	649990	5976700	0.0885854	0.205707	-0.847755	TB-EOT	Non significant
P20700	P20700	>SP|P20700|LMNB1_HUMAN Lamin-B1 OS=Homo sapiens OX=9606 GN=LMNB1 PE=1 SV=2	LMNB1	2	1	61856	1310.4	16338	10280	53646	10531	4919.3	7790	40165	21426	0.0175988	0.074149	2.07216	TB-EOT	Non significant
P20701-3	P20701-3;P20701;P20701-2	>SP|P20701-3|ITAL_HUMAN Isoform 3 of Integrin alpha-L OS=Homo sapiens OX=9606 GN=ITGAL;>SP|P20701|ITAL_HUMAN Integrin alpha-L OS=Homo sapiens OX=9606 GN=ITGAL PE=1 SV=3;>SP|P20701-2|ITAL_HUMAN Isoform 2 of Integrin alpha-L OS=Homo sapiens OX=9606 GN=ITGAL	ITGAL	4;4;4	3	64085	71412	208350	152010	195450	329680	48788	74048	91863	427000	0.289531	0.451669	-0.350173	TB-EOT	Non significant
P20702	P20702	>SP|P20702|ITAX_HUMAN Integrin alpha-X OS=Homo sapiens OX=9606 GN=ITGAX PE=1 SV=3	ITGAX	7	1	54926	90191	293630	93239	207710	525250	26441	73259	73097	1133200	0.00654475	0.0403019	-1.42293	TB-EOT	Downregulated
P20774	P20774	>SP|P20774|MIME_HUMAN Mimecan OS=Homo sapiens OX=9606 GN=OGN PE=1 SV=1	OGN	4	1	16350	23239	138410	759180	6304.7	79181	171600	299600	70810	81723	0.338072	0.498132	1.12153	TB-EOT	Non significant
P20810-9	P20810-9;P20810-5;P20810-10;P20810-7;P20810-6;P20810-4;P20810-8;P20810-2;P20810;P20810-3	>SP|P20810-9|ICAL_HUMAN Isoform 9 of Calpastatin OS=Homo sapiens OX=9606 GN=CAST;>SP|P20810-5|ICAL_HUMAN Isoform 5 of Calpastatin OS=Homo sapiens OX=9606 GN=CAST;>SP|P20810-10|ICAL_HUMAN Isoform 10 of Calpastatin OS=Homo sapiens OX=9606 GN=CAST;>SP|P20810-7|IC	CAST	18;18;18;18;18;15;15;15;15;14	10	2414200	556890	2527700	1479900	1346600	3936600	719440	906730	3368300	2018300	0.257605	0.419505	0.553514	TB-EOT	Non significant
P20962	P20962	>SP|P20962|PTMS_HUMAN Parathymosin OS=Homo sapiens OX=9606 GN=PTMS PE=1 SV=2	PTMS	5	1	3481800	788330	2878900	1597000	1049900	2986600	1272800	1064600	2482500	4700400	0.53321	0.663134	0.324854	TB-EOT	Non significant
P21266	P21266	>SP|P21266|GSTM3_HUMAN Glutathione S-transferase Mu 3 OS=Homo sapiens OX=9606 GN=GSTM3 PE=1 SV=3	GSTM3	4	1	11998	19080	85941	100210	32097	75812	74097	73313	34645	65310	0.283626	0.447391	0.578782	TB-EOT	Non significant
P21281	P21281;P15313	>SP|P21281|VATB2_HUMAN V-type proton ATPase subunit B, brain isoform OS=Homo sapiens OX=9606 GN=ATP6V1B2 PE=1 SV=3	ATP6V1B2	11;5	2	73183	136710	515240	185980	362480	445970	85895	157950	170240	682120	0.118307	0.251671	-0.493435	TB-EOT	Non significant
P21283	P21283;Q8NEY4-2;Q8NEY4	>SP|P21283|VATC1_HUMAN V-type proton ATPase subunit C 1 OS=Homo sapiens OX=9606 GN=ATP6V1C1 PE=1 SV=4	ATP6V1C1	10;1;1	3	90491	207070	801710	226340	383670	1137600	110050	181570	173540	1729000	0.00162227	0.0171575	-1.26621	TB-EOT	Downregulated
P21291	P21291	>SP|P21291|CSRP1_HUMAN Cysteine and glycine-rich protein 1 OS=Homo sapiens OX=9606 GN=CSRP1 PE=1 SV=3	CSRP1	4	1	159260	222160	559940	196290	163070	334980	205220	251650	180490	654740	0.570757	0.695054	-0.237226	TB-EOT	Non significant
P21333-2	P21333-2;P21333	>SP|P21333-2|FLNA_HUMAN Isoform 2 of Filamin-A OS=Homo sapiens OX=9606 GN=FLNA;>SP|P21333|FLNA_HUMAN Filamin-A OS=Homo sapiens OX=9606 GN=FLNA PE=1 SV=4	FLNA	91;91	2	10644000	6255200	41152000	9684300	12030000	53564000	2690400	8181100	5794600	72487000	0.0204441	0.0797321	-1.24685	TB-EOT	Non significant
P21399	P21399	>SP|P21399|ACOC_HUMAN Cytoplasmic aconitate hydratase OS=Homo sapiens OX=9606 GN=ACO1 PE=1 SV=3	ACO1	4	1	18275	41863	221150	88366	71901	147680	32860	50685	74711	208180	0.0786666	0.194873	-0.538754	TB-EOT	Non significant
P21695-2	P21695-2;P21695	>SP|P21695-2|GPDA_HUMAN Isoform 2 of Glycerol-3-phosphate dehydrogenase [NAD(+)], cytoplasmic OS=Homo sapiens OX=9606 GN=GPD1;>SP|P21695|GPDA_HUMAN Glycerol-3-phosphate dehydrogenase [NAD(+)], cytoplasmic OS=Homo sapiens OX=9606 GN=GPD1 PE=1 SV=4	GPD1	15;15	2	253140	1107700	4681600	1247100	2023200	5126800	243740	599280	460860	13138000	0.000918557	0.0116427	-2.01134	TB-EOT	Downregulated
P21730	P21730	>SP|P21730|C5AR1_HUMAN C5a anaphylatoxin chemotactic receptor 1 OS=Homo sapiens OX=9606 GN=C5AR1 PE=1 SV=2	C5AR1	2	1	18382	35544	45121	32568	43124	83380	25396	26529	20293	120000	0.322158	0.486354	-0.394105	TB-EOT	Non significant
P21926	P21926	>SP|P21926|CD9_HUMAN CD9 antigen OS=Homo sapiens OX=9606 GN=CD9 PE=1 SV=4	CD9	5	1	1203100	2224700	3158800	5807100	1835100	9735900	34750	1390200	2068300	7044100	0.19676	0.34836	-1.31128	TB-EOT	Non significant
P21964-2	P21964-2;P21964	>SP|P21964-2|COMT_HUMAN Isoform Soluble of Catechol O-methyltransferase OS=Homo sapiens OX=9606 GN=COMT;>SP|P21964|COMT_HUMAN Catechol O-methyltransferase OS=Homo sapiens OX=9606 GN=COMT PE=1 SV=2	COMT	5;5	2	65946	69519	223760	122110	128600	372740	57017	83694	126890	417160	0.152456	0.297671	-0.403926	TB-EOT	Non significant
P21980	P21980;P21980-2;P21980-3	>SP|P21980|TGM2_HUMAN Protein-glutamine gamma-glutamyltransferase 2 OS=Homo sapiens OX=9606 GN=TGM2 PE=1 SV=2;>SP|P21980-2|TGM2_HUMAN Isoform 2 of Protein-glutamine gamma-glutamyltransferase 2 OS=Homo sapiens OX=9606 GN=TGM2	TGM2	24;15;7	3	1117300	2957800	12183000	2787300	6918900	17861000	659180	1287300	6968200	48486000	0.00598239	0.037756	-1.70949	TB-EOT	Downregulated
P22059	P22059	>SP|P22059|OSBP1_HUMAN Oxysterol-binding protein 1 OS=Homo sapiens OX=9606 GN=OSBP PE=1 SV=1	OSBP	3	1	4090.3	11655	81837	29674	22391	67074	14527	23506	33821	68917	0.199059	0.35124	-0.510052	TB-EOT	Non significant
P22061	P22061;P22061-2	>SP|P22061|PIMT_HUMAN Protein-L-isoaspartate(D-aspartate) O-methyltransferase OS=Homo sapiens OX=9606 GN=PCMT1 PE=1 SV=4;>SP|P22061-2|PIMT_HUMAN Isoform 2 of Protein-L-isoaspartate(D-aspartate) O-methyltransferase OS=Homo sapiens OX=9606 GN=PCMT1	PCMT1	5;5	2	60213	60953	304400	213350	207920	402830	129990	143940	220770	485230	0.632947	0.743231	0.139504	TB-EOT	Non significant
P22079	P22079;P22079-2	>SP|P22079|PERL_HUMAN Lactoperoxidase OS=Homo sapiens OX=9606 GN=LPO PE=1 SV=2;>SP|P22079-2|PERL_HUMAN Isoform 2 of Lactoperoxidase OS=Homo sapiens OX=9606 GN=LPO	LPO	22;19	2	1440300	296620	1967100	1272300	1783200	1199700	337360	405530	10923000	1268000	0.0851823	0.202758	1.28165	TB-EOT	Non significant
P22234	P22234;P22234-2	>SP|P22234|PUR6_HUMAN Multifunctional protein ADE2 OS=Homo sapiens OX=9606 GN=PAICS PE=1 SV=3;>SP|P22234-2|PUR6_HUMAN Isoform 2 of Multifunctional protein ADE2 OS=Homo sapiens OX=9606 GN=PAICS	PAICS	7;7	2	42376	130120	378810	168090	286080	496220	131100	158890	177350	567430	0.200449	0.352537	-0.436461	TB-EOT	Non significant
P22314-2	P22314-2;P22314	>SP|P22314-2|UBA1_HUMAN Isoform 2 of Ubiquitin-like modifier-activating enzyme 1 OS=Homo sapiens OX=9606 GN=UBA1;>SP|P22314|UBA1_HUMAN Ubiquitin-like modifier-activating enzyme 1 OS=Homo sapiens OX=9606 GN=UBA1 PE=1 SV=3	UBA1	29;28	2	759020	1048700	5161100	3171400	4362200	5337900	1979900	2296400	3188700	6912000	0.613097	0.730243	0.155291	TB-EOT	Non significant
P22352	P22352	>SP|P22352|GPX3_HUMAN Glutathione peroxidase 3 OS=Homo sapiens OX=9606 GN=GPX3 PE=1 SV=2	GPX3	7	1	151300	205260	301330	857230	356770	205990	309120	609440	362470	291200	0.00622557	0.0388078	1.4916	TB-EOT	Upregulated
P22626-2	P22626-2;P22626	>SP|P22626-2|ROA2_HUMAN Isoform A2 of Heterogeneous nuclear ribonucleoproteins A2/B1 OS=Homo sapiens OX=9606 GN=HNRNPA2B1;>SP|P22626|ROA2_HUMAN Heterogeneous nuclear ribonucleoproteins A2/B1 OS=Homo sapiens OX=9606 GN=HNRNPA2B1 PE=1 SV=2	HNRNPA2B1	5;5	2	152190	47316	288830	93210	226320	209910	105870	118200	511820	286700	0.0754284	0.190893	0.824355	TB-EOT	Non significant
P22694-10	P22694-10;P22694-4;P22694-3;P17612-2;P22694;P17612;P22694-5;P22694-7;P22694-6;P22694-9;P22694-2;P22612	>SP|P22694-10|KAPCB_HUMAN Isoform 10 of cAMP-dependent protein kinase catalytic subunit beta OS=Homo sapiens OX=9606 GN=PRKACB;>SP|P22694-4|KAPCB_HUMAN Isoform 4 of cAMP-dependent protein kinase catalytic subunit beta OS=Homo sapiens OX=9606 GN=PRKACB;>SP|P22	PRKACB;PRKACA;PRKACG	2;2;2;2;2;2;2;2;2;2;2;1	12	23671	67444	228480	87649	97719	321840	68214	70433	68285	438990	0.0144974	0.0660334	-0.905441	TB-EOT	Non significant
P22792	P22792	>SP|P22792|CPN2_HUMAN Carboxypeptidase N subunit 2 OS=Homo sapiens OX=9606 GN=CPN2 PE=1 SV=3	CPN2	8	1	86852	184310	370070	398210	926420	134750	697220	1435200	727540	146310	0.00435766	0.0308279	2.33831	TB-EOT	Upregulated
P22891	P22891;P22891-2	>SP|P22891|PROZ_HUMAN Vitamin K-dependent protein Z OS=Homo sapiens OX=9606 GN=PROZ PE=1 SV=2;>SP|P22891-2|PROZ_HUMAN Isoform 2 of Vitamin K-dependent protein Z OS=Homo sapiens OX=9606 GN=PROZ	PROZ	3;3	2	8474.4	52767	63531	135540	80394	64075	65414	220910	60317	58361	0.157104	0.303627	1.00046	TB-EOT	Non significant
P22894	P22894	>SP|P22894|MMP8_HUMAN Neutrophil collagenase OS=Homo sapiens OX=9606 GN=MMP8 PE=1 SV=1	MMP8	11	1	2091600	66223	817450	216520	2437500	157660	411080	520870	2334200	182950	0.00233797	0.0211387	3.04507	TB-EOT	Upregulated
P22897	P22897;P22897-2	>SP|P22897|MRC1_HUMAN Macrophage mannose receptor 1 OS=Homo sapiens OX=9606 GN=MRC1 PE=1 SV=1	MRC1	49;17	2	2140500	5340400	7884100	11647000	9946400	21240000	1144300	2624000	2760200	28416000	0.0833257	0.199423	-0.966794	TB-EOT	Non significant
P23083	P23083	>SP|P23083|HV102_HUMAN Immunoglobulin heavy variable 1-2 OS=Homo sapiens OX=9606 GN=IGHV1-2 PE=1 SV=2		2	1	346180	87997	672670	1541500	1461100	247820	361690	814930	1614000	167440	2.45532e-05	0.00374789	2.78622	TB-EOT	Upregulated
P23141-3	P23141-3;P23141;P23141-2;Q9UKY3;Q9UKY3-2	>SP|P23141-3|EST1_HUMAN Isoform 3 of Liver carboxylesterase 1 OS=Homo sapiens OX=9606 GN=CES1;>SP|P23141|EST1_HUMAN Liver carboxylesterase 1 OS=Homo sapiens OX=9606 GN=CES1 PE=1 SV=2;>SP|P23141-2|EST1_HUMAN Isoform 2 of Liver carboxylesterase 1 OS=Homo sapien	CES1	19;19;19;3;1	5	2467400	1485100	2679000	1985800	2341000	5672600	1407300	819780	650400	10365000	0.324361	0.487226	-0.592553	TB-EOT	Non significant
P23142	P23142;P23142-2;P23142-3;CON__ENSEMBL:ENSBTAP00000016046	>SP|P23142|FBLN1_HUMAN Fibulin-1 OS=Homo sapiens OX=9606 GN=FBLN1 PE=1 SV=4;>SP|P23142-2|FBLN1_HUMAN Isoform A of Fibulin-1 OS=Homo sapiens OX=9606 GN=FBLN1;>SP|P23142-3|FBLN1_HUMAN Isoform B of Fibulin-1 OS=Homo sapiens OX=9606 GN=FBLN1	FBLN1	4;0;0;3	4	252200	507340	1070000	3324600	792330	427130	1365300	4590700	641040	420950	0.0250697	0.0934583	1.93264	TB-EOT	Non significant
P23280	P23280;P23280-2;P23280-3	>SP|P23280|CAH6_HUMAN Carbonic anhydrase 6 OS=Homo sapiens OX=9606 GN=CA6 PE=1 SV=3;>SP|P23280-2|CAH6_HUMAN Isoform 2 of Carbonic anhydrase 6 OS=Homo sapiens OX=9606 GN=CA6;>SP|P23280-3|CAH6_HUMAN Isoform 3 of Carbonic anhydrase 6 OS=Homo sapiens OX=9606 GN=C	CA6	3;3;2	3	143520	54329	45167	514660	91123	83442	43734	204440	757500	55750	0.00186811	0.0188172	2.55851	TB-EOT	Upregulated
P23284	P23284	>SP|P23284|PPIB_HUMAN Peptidyl-prolyl cis-trans isomerase B OS=Homo sapiens OX=9606 GN=PPIB PE=1 SV=2	PPIB	7	1	349780	98688	731790	226190	405020	395610	97251	103720	986040	578140	0.464694	0.605656	0.401395	TB-EOT	Non significant
P23381	P23381;P23381-2	>SP|P23381|SYWC_HUMAN Tryptophan--tRNA ligase, cytoplasmic OS=Homo sapiens OX=9606 GN=WARS PE=1 SV=2;>SP|P23381-2|SYWC_HUMAN Isoform 2 of Tryptophan--tRNA ligase, cytoplasmic OS=Homo sapiens OX=9606 GN=WARS	WARS	13;12	2	877250	1009000	9052300	2935200	6030300	8919000	1771900	2344500	1473700	10992000	0.270264	0.432707	-0.499144	TB-EOT	Non significant
P23396	P23396;P23396-2	>SP|P23396|RS3_HUMAN 40S ribosomal protein S3 OS=Homo sapiens OX=9606 GN=RPS3 PE=1 SV=2;>SP|P23396-2|RS3_HUMAN Isoform 2 of 40S ribosomal protein S3 OS=Homo sapiens OX=9606 GN=RPS3	RPS3	11;10	2	99002	704180	1223300	404880	355990	1797600	180230	349980	688770	3431600	0.000744992	0.0110013	-1.52102	TB-EOT	Downregulated
P23469-3	P23469-3;P23469-2;P23469	>SP|P23469-3|PTPRE_HUMAN Isoform 3 of Receptor-type tyrosine-protein phosphatase epsilon OS=Homo sapiens OX=9606 GN=PTPRE;>SP|P23469-2|PTPRE_HUMAN Isoform 2 of Receptor-type tyrosine-protein phosphatase epsilon OS=Homo sapiens OX=9606 GN=PTPRE;>SP|P23469|PTPR	PTPRE	4;4;4	3	4669.9	19286	115060	36540	44498	141540	15378	27383	9556.8	292560	0.0101248	0.0531026	-1.61183	TB-EOT	Non significant
P23526	P23526;P23526-2	>SP|P23526|SAHH_HUMAN Adenosylhomocysteinase OS=Homo sapiens OX=9606 GN=AHCY PE=1 SV=4;>SP|P23526-2|SAHH_HUMAN Isoform 2 of Adenosylhomocysteinase OS=Homo sapiens OX=9606 GN=AHCY	AHCY	14;12	2	204070	594780	3629100	1495900	1646900	2969400	1321300	1235800	1570000	3739800	0.595251	0.716847	-0.227435	TB-EOT	Non significant
P23528	P23528;Q9Y281-3;Q9Y281	>SP|P23528|COF1_HUMAN Cofilin-1 OS=Homo sapiens OX=9606 GN=CFL1 PE=1 SV=3	CFL1	12;1;1	3	2537300	2302100	23637000	6486400	7716800	13233000	1716500	3437800	4836700	21978000	0.0875358	0.205245	-0.659534	TB-EOT	Non significant
P23588-2	P23588-2;P23588	>SP|P23588-2|IF4B_HUMAN Isoform 2 of Eukaryotic translation initiation factor 4B OS=Homo sapiens OX=9606 GN=EIF4B;>SP|P23588|IF4B_HUMAN Eukaryotic translation initiation factor 4B OS=Homo sapiens OX=9606 GN=EIF4B PE=1 SV=2	EIF4B	3;3	2	72427	30914	161830	40344	51327	213690	35688	35024	91319	115890	0.652976	0.758818	-0.197971	TB-EOT	Non significant
P24158	P24158	>SP|P24158|PRTN3_HUMAN Myeloblastin OS=Homo sapiens OX=9606 GN=PRTN3 PE=1 SV=3	PRTN3	4	1	1283000	55995	443990	125670	1250200	114740	254990	288280	1941600	122180	0.0034499	0.0258488	2.87574	TB-EOT	Upregulated
P24386	P24386	>SP|P24386|RAE1_HUMAN Rab proteins geranylgeranyltransferase component A 1 OS=Homo sapiens OX=9606 GN=CHM PE=1 SV=3	CHM	2	1	10031	13686	51033	27271	22803	81842	19769	18379	17367	95475	0.123722	0.259561	-0.53256	TB-EOT	Non significant
P24534	P24534	>SP|P24534|EF1B_HUMAN Elongation factor 1-beta OS=Homo sapiens OX=9606 GN=EEF1B2 PE=1 SV=3	EEF1B2	7	1	716610	486000	2155300	944250	666570	1943700	411800	453980	3035900	1583300	0.805704	0.875796	0.107544	TB-EOT	Non significant
P24666	P24666;P24666-4;P24666-3;P24666-2	>SP|P24666|PPAC_HUMAN Low molecular weight phosphotyrosine protein phosphatase OS=Homo sapiens OX=9606 GN=ACP1 PE=1 SV=3;>SP|P24666-4|PPAC_HUMAN Isoform 4 of Low molecular weight phosphotyrosine protein phosphatase OS=Homo sapiens OX=9606 GN=ACP1;>SP|P24666-3	ACP1	3;2;2;2	4	151060	80584	234370	164500	223710	346910	258000	127890	210440	293660	0.0992056	0.224208	0.669251	TB-EOT	Non significant
P24821-6	P24821-6;P24821-5;P24821-2;P24821-3;P24821-4;P24821	>SP|P24821-6|TENA_HUMAN Isoform 6 of Tenascin OS=Homo sapiens OX=9606 GN=TNC;>SP|P24821-5|TENA_HUMAN Isoform 5 of Tenascin OS=Homo sapiens OX=9606 GN=TNC;>SP|P24821-2|TENA_HUMAN Isoform 2 of Tenascin OS=Homo sapiens OX=9606 GN=TNC;>SP|P24821-3|TENA_HUMAN Isofo	TNC	8;8;8;8;8;8	6	477290	36961	240410	224180	697820	116600	209570	302190	542000	134730	6.07312e-05	0.00421529	2.6243	TB-EOT	Upregulated
P25311	P25311	>SP|P25311|ZA2G_HUMAN Zinc-alpha-2-glycoprotein OS=Homo sapiens OX=9606 GN=AZGP1 PE=1 SV=2	AZGP1	18	1	20038000	3980500	16711000	17898000	17706000	10939000	4929900	7324100	78433000	5106400	0.00811395	0.0457086	1.90919	TB-EOT	Upregulated
P25325	P25325;P25325-2	>SP|P25325|THTM_HUMAN 3-mercaptopyruvate sulfurtransferase OS=Homo sapiens OX=9606 GN=MPST PE=1 SV=3;>SP|P25325-2|THTM_HUMAN Isoform 2 of 3-mercaptopyruvate sulfurtransferase OS=Homo sapiens OX=9606 GN=MPST	MPST	7;7	2	188980	93045	225720	360160	249410	308120	317940	259180	311820	629830	0.0170582	0.0724737	0.981568	TB-EOT	Non significant
P25398	P25398	>SP|P25398|RS12_HUMAN 40S ribosomal protein S12 OS=Homo sapiens OX=9606 GN=RPS12 PE=1 SV=3	RPS12	3	1	45178	151660	419410	225090	101280	465500	183580	119110	228270	533150	0.155322	0.302103	-0.57462	TB-EOT	Non significant
P25705-2	P25705-2;P25705-3;P25705	>SP|P25705-2|ATPA_HUMAN Isoform 2 of ATP synthase subunit alpha, mitochondrial OS=Homo sapiens OX=9606 GN=ATP5F1A;>SP|P25705-3|ATPA_HUMAN Isoform 3 of ATP synthase subunit alpha, mitochondrial OS=Homo sapiens OX=9606 GN=ATP5F1A;>SP|P25705|ATPA_HUMAN ATP synth	ATP5A1	2;2;2	3	36271	72705	90536	87305	43961	63251	61235	88955	20778	254720	0.79244	0.8665	-0.16184	TB-EOT	Non significant
P25774	P25774;P25774-2	>SP|P25774|CATS_HUMAN Cathepsin S OS=Homo sapiens OX=9606 GN=CTSS PE=1 SV=3;>SP|P25774-2|CATS_HUMAN Isoform 2 of Cathepsin S OS=Homo sapiens OX=9606 GN=CTSS	CTSS	8;7	2	1119800	1208000	1281300	1105700	1273300	2357300	187930	451270	989660	6298900	0.1854	0.337716	-0.759585	TB-EOT	Non significant
P25786	P25786;P25786-2	>SP|P25786|PSA1_HUMAN Proteasome subunit alpha type-1 OS=Homo sapiens OX=9606 GN=PSMA1 PE=1 SV=1;>SP|P25786-2|PSA1_HUMAN Isoform Long of Proteasome subunit alpha type-1 OS=Homo sapiens OX=9606 GN=PSMA1	PSMA1	14;14	2	416980	1290900	5412700	2520100	1179900	5552300	2378600	1804000	1082600	9160600	0.0969457	0.221071	-0.839966	TB-EOT	Non significant
P25787	P25787	>SP|P25787|PSA2_HUMAN Proteasome subunit alpha type-2 OS=Homo sapiens OX=9606 GN=PSMA2 PE=1 SV=2	PSMA2	5	1	146600	400000	1444800	620650	517540	1452900	647140	445560	372940	2455000	0.107722	0.237114	-0.674486	TB-EOT	Non significant
P25788-2	P25788-2;P25788	>SP|P25788-2|PSA3_HUMAN Isoform 2 of Proteasome subunit alpha type-3 OS=Homo sapiens OX=9606 GN=PSMA3;>SP|P25788|PSA3_HUMAN Proteasome subunit alpha type-3 OS=Homo sapiens OX=9606 GN=PSMA3 PE=1 SV=2	PSMA3	6;6	2	219880	353130	1650600	827510	686180	1611800	804280	513120	561440	2432300	0.429521	0.575089	-0.292611	TB-EOT	Non significant
P25789	P25789;P25789-2	>SP|P25789|PSA4_HUMAN Proteasome subunit alpha type-4 OS=Homo sapiens OX=9606 GN=PSMA4 PE=1 SV=1;>SP|P25789-2|PSA4_HUMAN Isoform 2 of Proteasome subunit alpha type-4 OS=Homo sapiens OX=9606 GN=PSMA4	PSMA4	7;4	2	266160	272800	1738500	888530	852380	1562800	626520	481730	782530	2542100	0.747858	0.832718	-0.103236	TB-EOT	Non significant
P25815	P25815	>SP|P25815|S100P_HUMAN Protein S100-P OS=Homo sapiens OX=9606 GN=S100P PE=1 SV=2	S100P	2	1	2561500	65600	1052700	498510	1295800	389340	276160	191120	8323600	520370	0.0243479	0.0909905	2.32049	TB-EOT	Non significant
P26022	P26022	>SP|P26022|PTX3_HUMAN Pentraxin-related protein PTX3 OS=Homo sapiens OX=9606 GN=PTX3 PE=1 SV=3	PTX3	6	1	72091	6217.2	53444	35983	259200	23561	27885	66070	93757	22436	0.000332812	0.00723154	2.62796	TB-EOT	Upregulated
P26038	P26038;REV__Q9H446-2;REV__Q9H446	>SP|P26038|MOES_HUMAN Moesin OS=Homo sapiens OX=9606 GN=MSN PE=1 SV=3	MSN	27;1;1	3	7596100	10004000	51071000	21499000	22818000	62742000	6358500	14049000	14972000	106800000	0.0185024	0.076891	-0.861281	TB-EOT	Non significant
P26368-2	P26368-2;P26368	>SP|P26368-2|U2AF2_HUMAN Isoform 2 of Splicing factor U2AF 65 kDa subunit OS=Homo sapiens OX=9606 GN=U2AF2;>SP|P26368|U2AF2_HUMAN Splicing factor U2AF 65 kDa subunit OS=Homo sapiens OX=9606 GN=U2AF2 PE=1 SV=4	U2AF2	2;2	2	7199	7302.2	58436	10805	13022	32184	5056.3	2725.5	26321	46433	0.079703	0.195877	-0.882096	TB-EOT	Non significant
P26373-2	P26373-2;P26373	>SP|P26373-2|RL13_HUMAN Isoform 2 of 60S ribosomal protein L13 OS=Homo sapiens OX=9606 GN=RPL13;>SP|P26373|RL13_HUMAN 60S ribosomal protein L13 OS=Homo sapiens OX=9606 GN=RPL13 PE=1 SV=4	RPL13	4;4	2	24223	61152	89239	43720	43623	138220	24214	32114	41630	233370	0.0127196	0.0602695	-0.910795	TB-EOT	Non significant
P26447	P26447	>SP|P26447|S10A4_HUMAN Protein S100-A4 OS=Homo sapiens OX=9606 GN=S100A4 PE=1 SV=1	S100A4	5	1	2786500	984440	2951700	1484200	1617500	2238800	925430	648760	1126700	6701000	0.793404	0.866931	-0.141166	TB-EOT	Non significant
P26639	P26639;P26639-2;A2RTX5-2;A2RTX5	>SP|P26639|SYTC_HUMAN Threonine--tRNA ligase, cytoplasmic OS=Homo sapiens OX=9606 GN=TARS PE=1 SV=3;>SP|P26639-2|SYTC_HUMAN Isoform 2 of Threonine--tRNA ligase, cytoplasmic OS=Homo sapiens OX=9606 GN=TARS	TARS	14;14;1;1	4	51976	278980	1231200	307900	254500	933850	280000	273090	235760	1399700	0.0130585	0.0611136	-1.14272	TB-EOT	Non significant
P26640	P26640;P26640-2	>SP|P26640|SYVC_HUMAN Valine--tRNA ligase OS=Homo sapiens OX=9606 GN=VARS PE=1 SV=4	VARS	3;1	2	14102	40867	123650	49690	69602	105480	29153	33707	55858	166690	0.0812892	0.197194	-0.524194	TB-EOT	Non significant
P26641	P26641;P26641-2	>SP|P26641|EF1G_HUMAN Elongation factor 1-gamma OS=Homo sapiens OX=9606 GN=EEF1G PE=1 SV=3;>SP|P26641-2|EF1G_HUMAN Isoform 2 of Elongation factor 1-gamma OS=Homo sapiens OX=9606 GN=EEF1G	EEF1G	13;12	2	219640	1367000	3957800	926840	1362900	3898700	761280	873630	1237700	4140900	0.00523832	0.0344913	-1.10989	TB-EOT	Downregulated
P27105	P27105;P27105-2	>SP|P27105|STOM_HUMAN Erythrocyte band 7 integral membrane protein OS=Homo sapiens OX=9606 GN=STOM PE=1 SV=3	STOM	10;3	2	548940	487240	1436800	2287700	1796000	2755100	470850	852780	1149800	2118400	0.284282	0.447391	0.359414	TB-EOT	Non significant
P27169	P27169	>SP|P27169|PON1_HUMAN Serum paraoxonase/arylesterase 1 OS=Homo sapiens OX=9606 GN=PON1 PE=1 SV=3	PON1	6	1	35507	71001	320000	271450	595870	55185	120050	699940	562150	98168	0.00894831	0.0489582	2.12971	TB-EOT	Upregulated
P27348	P27348	>SP|P27348|1433T_HUMAN 14-3-3 protein theta OS=Homo sapiens OX=9606 GN=YWHAQ PE=1 SV=1	YWHAQ	7	1	136610	531340	2040600	913950	750030	2209000	572420	617200	623590	2509700	0.0615309	0.166635	-0.722728	TB-EOT	Non significant
P27487	P27487	>SP|P27487|DPP4_HUMAN Dipeptidyl peptidase 4 OS=Homo sapiens OX=9606 GN=DPP4 PE=1 SV=2	DPP4	17	1	637020	768630	2058500	3147100	1414900	4425400	419720	689190	1080400	4390700	0.319131	0.485399	-0.407178	TB-EOT	Non significant
P27635	P27635;Q96L21	>SP|P27635|RL10_HUMAN 60S ribosomal protein L10 OS=Homo sapiens OX=9606 GN=RPL10 PE=1 SV=4	RPL10	4;1	2	15737	243070	462660	107580	56972	628320	44727	88021	63582	1162100	3.429e-05	0.00374789	-2.45839	TB-EOT	Downregulated
P27695	P27695	>SP|P27695|APEX1_HUMAN DNA-(apurinic or apyrimidinic site) lyase OS=Homo sapiens OX=9606 GN=APEX1 PE=1 SV=2	APEX1	5	1	34412	85780	419370	111200	146780	355180	106730	102290	164260	606100	0.0430363	0.13032	-0.70968	TB-EOT	Non significant
P27701-2	P27701-2;P27701	>SP|P27701-2|CD82_HUMAN Isoform 2 of CD82 antigen OS=Homo sapiens OX=9606 GN=CD82;>SP|P27701|CD82_HUMAN CD82 antigen OS=Homo sapiens OX=9606 GN=CD82 PE=1 SV=1	CD82	3;3	2	65498	27021	123450	57288	126380	165420	42002	34694	126420	163680	0.419487	0.563953	0.307925	TB-EOT	Non significant
P27797	P27797	>SP|P27797|CALR_HUMAN Calreticulin OS=Homo sapiens OX=9606 GN=CALR PE=1 SV=1	CALR	14	1	11273000	2056000	5801000	3289700	4266400	4160900	1706600	1853100	12545000	6557800	0.174745	0.323562	0.873431	TB-EOT	Non significant
P27816	P27816;P27816-6;P27816-2;P27816-5;P27816-4;P27816-7	>SP|P27816|MAP4_HUMAN Microtubule-associated protein 4 OS=Homo sapiens OX=9606 GN=MAP4 PE=1 SV=3;>SP|P27816-6|MAP4_HUMAN Isoform 6 of Microtubule-associated protein 4 OS=Homo sapiens OX=9606 GN=MAP4;>SP|P27816-2|MAP4_HUMAN Isoform 2 of Microtubule-associated	MAP4	25;24;19;10;8;1	6	611910	689700	2968300	1092200	707790	3562100	467650	757280	1155900	4247400	0.0192162	0.077176	-0.77566	TB-EOT	Non significant
P27824	P27824;P27824-2;P27824-3	>SP|P27824|CALX_HUMAN Calnexin OS=Homo sapiens OX=9606 GN=CANX PE=1 SV=2;>SP|P27824-2|CALX_HUMAN Isoform 2 of Calnexin OS=Homo sapiens OX=9606 GN=CANX;>SP|P27824-3|CALX_HUMAN Isoform 3 of Calnexin OS=Homo sapiens OX=9606 GN=CANX	CANX	6;6;5	3	469240	169890	387620	274560	251280	462000	237460	188960	284510	832020	0.508461	0.642333	0.309906	TB-EOT	Non significant
P27918	P27918	>SP|P27918|PROP_HUMAN Properdin OS=Homo sapiens OX=9606 GN=CFP PE=1 SV=2	CFP	2	1	21235	18915	44274	21627	69309	30539	61734	59434	20778	23271	0.0492407	0.142386	1.25767	TB-EOT	Non significant
P28062-2	P28062-2;P28062	>SP|P28062-2|PSB8_HUMAN Isoform 2 of Proteasome subunit beta type-8 OS=Homo sapiens OX=9606 GN=PSMB8;>SP|P28062|PSB8_HUMAN Proteasome subunit beta type-8 OS=Homo sapiens OX=9606 GN=PSMB8 PE=1 SV=3	PSMB8	5;5	2	259830	120990	802620	467120	496210	596250	355970	256480	729730	1307100	0.191866	0.34495	0.461437	TB-EOT	Non significant
P28065-2	P28065-2;P28065	>SP|P28065-2|PSB9_HUMAN Isoform LMP2.S of Proteasome subunit beta type-9 OS=Homo sapiens OX=9606 GN=PSMB9;>SP|P28065|PSB9_HUMAN Proteasome subunit beta type-9 OS=Homo sapiens OX=9606 GN=PSMB9 PE=1 SV=2	PSMB9	4;4	2	220450	64239	263390	233480	725120	249960	128130	128740	681460	440650	0.0107133	0.0545413	1.25444	TB-EOT	Non significant
P28066	P28066;P28066-2	>SP|P28066|PSA5_HUMAN Proteasome subunit alpha type-5 OS=Homo sapiens OX=9606 GN=PSMA5 PE=1 SV=3;>SP|P28066-2|PSA5_HUMAN Isoform 2 of Proteasome subunit alpha type-5 OS=Homo sapiens OX=9606 GN=PSMA5	PSMA5	7;4	2	427580	198680	930590	717370	839110	1052900	313420	364860	933130	1421000	0.136983	0.274991	0.456464	TB-EOT	Non significant
P28070	P28070	>SP|P28070|PSB4_HUMAN Proteasome subunit beta type-4 OS=Homo sapiens OX=9606 GN=PSMB4 PE=1 SV=4	PSMB4	6	1	80491	85120	564240	339720	265680	511750	212830	172340	212050	1077700	0.619241	0.734112	-0.184904	TB-EOT	Non significant
P28074-3	P28074-3;P28074;P28074-2	>SP|P28074-3|PSB5_HUMAN Isoform 3 of Proteasome subunit beta type-5 OS=Homo sapiens OX=9606 GN=PSMB5;>SP|P28074|PSB5_HUMAN Proteasome subunit beta type-5 OS=Homo sapiens OX=9606 GN=PSMB5 PE=1 SV=3;>SP|P28074-2|PSB5_HUMAN Isoform 2 of Proteasome subunit beta t	PSMB5	2;2;1	3	9344	7039	27633	31246	16401	39771	10286	14929	25405	41171	0.280956	0.445603	0.312965	TB-EOT	Non significant
P28161	P28161;P28161-2	>SP|P28161|GSTM2_HUMAN Glutathione S-transferase Mu 2 OS=Homo sapiens OX=9606 GN=GSTM2 PE=1 SV=2;>SP|P28161-2|GSTM2_HUMAN Isoform 2 of Glutathione S-transferase Mu 2 OS=Homo sapiens OX=9606 GN=GSTM2	GSTM2	2;2	2	14551	13875	62455	66864	44125	74723	55190	47248	29029	68867	0.15942	0.3057	0.601529	TB-EOT	Non significant
P28482-2	P28482-2;P28482	>SP|P28482-2|MK01_HUMAN Isoform 2 of Mitogen-activated protein kinase 1 OS=Homo sapiens OX=9606 GN=MAPK1;>SP|P28482|MK01_HUMAN Mitogen-activated protein kinase 1 OS=Homo sapiens OX=9606 GN=MAPK1 PE=1 SV=3	MAPK1	2;2	2	17055	49655	113730	87631	84200	130860	42289	59783	75432	143310	0.844796	0.899185	-0.0601702	TB-EOT	Non significant
P28676	P28676	>SP|P28676|GRAN_HUMAN Grancalcin OS=Homo sapiens OX=9606 GN=GCA PE=1 SV=2	GCA	5	1	280330	99789	427210	149950	482390	492860	207140	207840	439930	860280	0.329741	0.489924	0.413736	TB-EOT	Non significant
P28838-2	P28838-2;P28838	>SP|P28838-2|AMPL_HUMAN Isoform 2 of Cytosol aminopeptidase OS=Homo sapiens OX=9606 GN=LAP3;>SP|P28838|AMPL_HUMAN Cytosol aminopeptidase OS=Homo sapiens OX=9606 GN=LAP3 PE=1 SV=3	LAP3	24;24	2	218950	574330	5089200	1250600	2632400	2183000	717470	1086300	2275200	5262400	0.447366	0.59169	-0.350997	TB-EOT	Non significant
P29144	P29144	>SP|P29144|TPP2_HUMAN Tripeptidyl-peptidase 2 OS=Homo sapiens OX=9606 GN=TPP2 PE=1 SV=4	TPP2	5	1	14135	45687	250340	73779	129370	197330	47838	64928	78510	244410	0.129803	0.26572	-0.579532	TB-EOT	Non significant
P29218	P29218;P29218-3;P29218-2	>SP|P29218|IMPA1_HUMAN Inositol monophosphatase 1 OS=Homo sapiens OX=9606 GN=IMPA1 PE=1 SV=1;>SP|P29218-3|IMPA1_HUMAN Isoform 3 of Inositol monophosphatase 1 OS=Homo sapiens OX=9606 GN=IMPA1;>SP|P29218-2|IMPA1_HUMAN Isoform 2 of Inositol monophosphatase 1 OS=	IMPA1	6;6;3	3	121290	121820	558100	447200	389120	1133200	364810	245280	574910	989950	0.68834	0.787617	0.144357	TB-EOT	Non significant
P29350	P29350;P29350-3;P29350-4;P29350-2	>SP|P29350|PTN6_HUMAN Tyrosine-protein phosphatase non-receptor type 6 OS=Homo sapiens OX=9606 GN=PTPN6 PE=1 SV=1;>SP|P29350-3|PTN6_HUMAN Isoform 2 of Tyrosine-protein phosphatase non-receptor type 6 OS=Homo sapiens OX=9606 GN=PTPN6;>SP|P29350-4|PTN6_HUMAN Is	PTPN6	16;16;15;13	4	245590	524160	4140200	484490	1061400	2107500	183730	382490	454380	5102500	0.00102537	0.0125773	-1.60446	TB-EOT	Downregulated
P29401	P29401;P29401-2	>SP|P29401|TKT_HUMAN Transketolase OS=Homo sapiens OX=9606 GN=TKT PE=1 SV=3;>SP|P29401-2|TKT_HUMAN Isoform 2 of Transketolase OS=Homo sapiens OX=9606 GN=TKT	TKT	21;21	2	1575400	5569600	43157000	8141800	12979000	29282000	6451900	8924300	10460000	56806000	0.0255713	0.0944141	-1.026	TB-EOT	Non significant
P29466-2	P29466-2;P29466;P29466-5;P29466-4;P29466-3;Q5EG05-2;Q5EG05	>SP|P29466-2|CASP1_HUMAN Isoform Beta of Caspase-1 OS=Homo sapiens OX=9606 GN=CASP1;>SP|P29466|CASP1_HUMAN Caspase-1 OS=Homo sapiens OX=9606 GN=CASP1 PE=1 SV=1;>SP|P29466-5|CASP1_HUMAN Isoform Epsilon of Caspase-1 OS=Homo sapiens OX=9606 GN=CASP1;>SP|P29466-4|	CASP1	3;3;2;2;2;1;1	7	55965	102690	339980	121450	124390	310620	51741	85953	81906	530340	0.00777089	0.044602	-0.887295	TB-EOT	Non significant
P29508	P29508;P29508-2	>SP|P29508|SPB3_HUMAN Serpin B3 OS=Homo sapiens OX=9606 GN=SERPINB3 PE=1 SV=2;>SP|P29508-2|SPB3_HUMAN Isoform 2 of Serpin B3 OS=Homo sapiens OX=9606 GN=SERPINB3	SERPINB3	8;7	2	2530100	323410	10604000	3878100	5779000	6957300	4397800	5187200	9114300	13505000	0.0968895	0.221071	1.02857	TB-EOT	Non significant
P29622	P29622	>SP|P29622|KAIN_HUMAN Kallistatin OS=Homo sapiens OX=9606 GN=SERPINA4 PE=1 SV=3	SERPINA4	6	1	14959	83373	168550	260090	173060	120950	104660	150600	116700	94151	0.210109	0.363982	0.739209	TB-EOT	Non significant
P29692-3	P29692-3;P29692;P29692-2;P29692-4	>SP|P29692-3|EF1D_HUMAN Isoform 3 of Elongation factor 1-delta OS=Homo sapiens OX=9606 GN=EEF1D;>SP|P29692|EF1D_HUMAN Elongation factor 1-delta OS=Homo sapiens OX=9606 GN=EEF1D PE=1 SV=5;>SP|P29692-2|EF1D_HUMAN Isoform 2 of Elongation factor 1-delta OS=Homo s	EEF1D	9;9;9;7	4	501870	196740	1596500	716180	700950	1453700	242240	419670	1533700	1769200	0.684473	0.785724	0.15599	TB-EOT	Non significant
P29728-2	P29728-2;P29728	>SP|P29728-2|OAS2_HUMAN Isoform p69 of 2-5-oligoadenylate synthase 2 OS=Homo sapiens OX=9606 GN=OAS2;>SP|P29728|OAS2_HUMAN 2-5-oligoadenylate synthase 2 OS=Homo sapiens OX=9606 GN=OAS2 PE=1 SV=3	OAS2	2;2	2	5287.4	25059	68513	18012	21697	71583	7382.1	11679	15413	104650	9.4061e-05	0.00456573	-1.48198	TB-EOT	Downregulated
P29966	P29966	>SP|P29966|MARCS_HUMAN Myristoylated alanine-rich C-kinase substrate OS=Homo sapiens OX=9606 GN=MARCKS PE=1 SV=4	MARCKS	5	1	724560	48417	410010	172660	346210	497910	132910	154400	669680	203140	0.0544155	0.151864	1.31166	TB-EOT	Non significant
P29972-4	P29972-4;P29972-2;P29972-3;P29972	>SP|P29972-4|AQP1_HUMAN Isoform 4 of Aquaporin-1 OS=Homo sapiens OX=9606 GN=AQP1;>SP|P29972-2|AQP1_HUMAN Isoform 2 of Aquaporin-1 OS=Homo sapiens OX=9606 GN=AQP1;>SP|P29972-3|AQP1_HUMAN Isoform 3 of Aquaporin-1 OS=Homo sapiens OX=9606 GN=AQP1;>SP|P29972|AQP1_H	AQP1	2;2;2;2	4	12495	51069	23697	56909	11966	111240	12725	27668	9099.2	68649	0.232558	0.389561	-0.810878	TB-EOT	Non significant
P29992	P29992;O95837	>SP|P29992|GNA11_HUMAN Guanine nucleotide-binding protein subunit alpha-11 OS=Homo sapiens OX=9606 GN=GNA11 PE=1 SV=2;>SP|O95837|GNA14_HUMAN Guanine nucleotide-binding protein subunit alpha-14 OS=Homo sapiens OX=9606 GN=GNA14 PE=1 SV=1	GNA11;GNA14	2;1	2	19651	31358	174030	101690	138620	325130	46284	54154	84426	218610	0.398975	0.54769	-0.313646	TB-EOT	Non significant
P30040	P30040;P30040-2	>SP|P30040|ERP29_HUMAN Endoplasmic reticulum resident protein 29 OS=Homo sapiens OX=9606 GN=ERP29 PE=1 SV=4	ERP29	6;1	2	56504	31581	152000	71712	78832	92132	34051	45896	181310	179800	0.320706	0.486354	0.362377	TB-EOT	Non significant
P30041	P30041	>SP|P30041|PRDX6_HUMAN Peroxiredoxin-6 OS=Homo sapiens OX=9606 GN=PRDX6 PE=1 SV=3	PRDX6	13	1	482940	2077600	6253800	4264600	1457100	10242000	5058300	3251600	2381800	7867300	0.379849	0.5359	-0.504427	TB-EOT	Non significant
P30043	P30043	>SP|P30043|BLVRB_HUMAN Flavin reductase (NADPH) OS=Homo sapiens OX=9606 GN=BLVRB PE=1 SV=3	BLVRB	4	1	30112	31752	79543	87427	53841	68567	71422	72281	101050	85491	0.0170448	0.0724737	0.920063	TB-EOT	Non significant
P30044-2	P30044-2;P30044;P30044-3;P30044-4	>SP|P30044-2|PRDX5_HUMAN Isoform Cytoplasmic+peroxisomal of Peroxiredoxin-5, mitochondrial OS=Homo sapiens OX=9606 GN=PRDX5;>SP|P30044|PRDX5_HUMAN Peroxiredoxin-5, mitochondrial OS=Homo sapiens OX=9606 GN=PRDX5 PE=1 SV=4;>SP|P30044-3|PRDX5_HUMAN Isoform 3 of	PRDX5	8;8;7;3	4	839470	359830	1323400	1651200	679350	4016400	1265600	860450	2754500	2030300	0.196969	0.34836	0.617716	TB-EOT	Non significant
P30046	P30046;P30046-2;A6NHG4	>SP|P30046|DOPD_HUMAN D-dopachrome decarboxylase OS=Homo sapiens OX=9606 GN=DDT PE=1 SV=3;>SP|P30046-2|DOPD_HUMAN Isoform 2 of D-dopachrome decarboxylase OS=Homo sapiens OX=9606 GN=DDT;>SP|A6NHG4|DDTL_HUMAN D-dopachrome decarboxylase-like protein OS=Homo sapi	DDT;DDTL	4;3;3	3	61457	17362	78544	72121	74749	108890	53806	44864	132990	126410	0.0160416	0.0703151	0.921882	TB-EOT	Non significant
P30048-2	P30048-2;P30048	>SP|P30048-2|PRDX3_HUMAN Isoform 2 of Thioredoxin-dependent peroxide reductase, mitochondrial OS=Homo sapiens OX=9606 GN=PRDX3;>SP|P30048|PRDX3_HUMAN Thioredoxin-dependent peroxide reductase, mitochondrial OS=Homo sapiens OX=9606 GN=PRDX3 PE=1 SV=3	PRDX3	6;6	2	336840	109820	392920	201930	304290	385750	187360	133580	346960	1002900	0.560001	0.685798	0.259834	TB-EOT	Non significant
P30085	P30085;P30085-2	>SP|P30085|KCY_HUMAN UMP-CMP kinase OS=Homo sapiens OX=9606 GN=CMPK1 PE=1 SV=3;>SP|P30085-2|KCY_HUMAN Isoform 2 of UMP-CMP kinase OS=Homo sapiens OX=9606 GN=CMPK1	CMPK1	4;2	2	88075	232620	491250	315390	297600	550100	180300	176490	860320	534640	0.868373	0.914091	0.0628686	TB-EOT	Non significant
P30086	P30086	>SP|P30086|PEBP1_HUMAN Phosphatidylethanolamine-binding protein 1 OS=Homo sapiens OX=9606 GN=PEBP1 PE=1 SV=3	PEBP1	8	1	617210	1057700	5005500	2731100	1830100	7632100	2010800	1928000	2420100	8756800	0.217227	0.372344	-0.450189	TB-EOT	Non significant
P30101	P30101	>SP|P30101|PDIA3_HUMAN Protein disulfide-isomerase A3 OS=Homo sapiens OX=9606 GN=PDIA3 PE=1 SV=4	PDIA3	15	1	405520	536260	2836300	955510	1027900	1262700	679140	748090	3170100	2467900	0.624074	0.736865	0.18939	TB-EOT	Non significant
P30153	P30153	>SP|P30153|2AAA_HUMAN Serine/threonine-protein phosphatase 2A 65 kDa regulatory subunit A alpha isoform OS=Homo sapiens OX=9606 GN=PPP2R1A PE=1 SV=4	PPP2R1A	9	1	86225	392260	2062600	907970	768640	1959600	207080	493090	488890	2598600	0.020946	0.0812726	-1.0498	TB-EOT	Non significant
P30520	P30520;P9WHN3	>SP|P30520|PURA2_HUMAN Adenylosuccinate synthetase isozyme 2 OS=Homo sapiens OX=9606 GN=ADSS PE=1 SV=3	ADSS	13;1	2	143920	265490	1088200	524040	705490	1070000	340670	465270	801380	1214200	0.974262	0.985929	0.0092622	TB-EOT	Non significant
P30530-2	P30530-2;P30530	>SP|P30530-2|UFO_HUMAN Isoform Short of Tyrosine-protein kinase receptor UFO OS=Homo sapiens OX=9606 GN=AXL;>SP|P30530|UFO_HUMAN Tyrosine-protein kinase receptor UFO OS=Homo sapiens OX=9606 GN=AXL PE=1 SV=4	AXL	3;3	2	98043	40922	99913	370560	211780	236040	20953	37257	74852	138570	0.374107	0.530305	0.560292	TB-EOT	Non significant
P30622-2	P30622-2;P30622-1;P30622	>SP|P30622-2|CLIP1_HUMAN Isoform 3 of CAP-Gly domain-containing linker protein 1 OS=Homo sapiens OX=9606 GN=CLIP1;>SP|P30622-1|CLIP1_HUMAN Isoform 2 of CAP-Gly domain-containing linker protein 1 OS=Homo sapiens OX=9606 GN=CLIP1;>SP|P30622|CLIP1_HUMAN CAP-Gly	CLIP1	2;2;2	3	18726	6025.5	15547	12626	15007	18826	7773.2	8828.5	20928	17736	0.0495728	0.142416	0.837602	TB-EOT	Non significant
P30626-3	P30626-3;P30626-2;P30626	>SP|P30626-3|SORCN_HUMAN Isoform 3 of Sorcin OS=Homo sapiens OX=9606 GN=SRI;>SP|P30626-2|SORCN_HUMAN Isoform 2 of Sorcin OS=Homo sapiens OX=9606 GN=SRI;>SP|P30626|SORCN_HUMAN Sorcin OS=Homo sapiens OX=9606 GN=SRI PE=1 SV=1	SRI	9;9;9	3	568440	626720	2069400	1412700	679970	4989100	1348100	864210	976480	2536600	0.53823	0.666651	-0.266329	TB-EOT	Non significant
P30711	P30711;P30711-2;P0CG30;P0CG29	>SP|P30711|GSTT1_HUMAN Glutathione S-transferase theta-1 OS=Homo sapiens OX=9606 GN=GSTT1 PE=1 SV=4	GSTT1	4;1;1;1	4	19488	123030	1037300	115400	118790	1132600	289870	97416	153830	67220	0.385592	0.539792	-0.757447	TB-EOT	Non significant
P30740	P30740;P30740-2;O75830	>SP|P30740|ILEU_HUMAN Leukocyte elastase inhibitor OS=Homo sapiens OX=9606 GN=SERPINB1 PE=1 SV=1	SERPINB1	18;8;0	3	1133600	1512700	4822000	3655000	3241900	9185500	2700500	2673900	2033700	8877400	0.619195	0.734112	-0.176067	TB-EOT	Non significant
P30838	P30838;P51648;P51648-2	>SP|P30838|AL3A1_HUMAN Aldehyde dehydrogenase, dimeric NADP-preferring OS=Homo sapiens OX=9606 GN=ALDH3A1 PE=1 SV=3	ALDH3A1	19;0;0	3	1996800	7966300	26210000	7989400	3491300	74937000	383230	4011000	25539000	17410000	0.0337821	0.109796	-1.80744	TB-EOT	Non significant
P31025	P31025;Q5VSP4	>SP|P31025|LCN1_HUMAN Lipocalin-1 OS=Homo sapiens OX=9606 GN=LCN1 PE=1 SV=1;>SP|Q5VSP4|LC1L1_HUMAN Putative lipocalin 1-like protein 1 OS=Homo sapiens OX=9606 GN=LCN1P1 PE=5 SV=1	LCN1;LCN1P1	4;2	2	766500	130670	437370	543680	122500	371390	79083	212480	3711600	358440	0.164224	0.311453	1.23441	TB-EOT	Non significant
P31146	P31146	>SP|P31146|COR1A_HUMAN Coronin-1A OS=Homo sapiens OX=9606 GN=CORO1A PE=1 SV=4	CORO1A	10	1	248830	413070	3188400	1138100	2549000	1680000	285080	807430	815790	1588900	0.863574	0.910885	-0.0766141	TB-EOT	Non significant
P31150	P31150	>SP|P31150|GDIA_HUMAN Rab GDP dissociation inhibitor alpha OS=Homo sapiens OX=9606 GN=GDI1 PE=1 SV=2	GDI1	16	1	830540	1231900	6850800	3115500	4520200	11455000	3331200	2537900	2597300	12716000	0.366733	0.523268	-0.374452	TB-EOT	Non significant
P31151	P31151;Q86SG5	>SP|P31151|S10A7_HUMAN Protein S100-A7 OS=Homo sapiens OX=9606 GN=S100A7 PE=1 SV=4	S100A7	3;1	2	134630	42153	69524	125960	49083	65467	26940	31206	127410	41163	0.067101	0.175241	1.1917	TB-EOT	Non significant
P31153	P31153;P31153-2;Q00266	>SP|P31153|METK2_HUMAN S-adenosylmethionine synthase isoform type-2 OS=Homo sapiens OX=9606 GN=MAT2A PE=1 SV=1;>SP|P31153-2|METK2_HUMAN Isoform 2 of S-adenosylmethionine synthase isoform type-2 OS=Homo sapiens OX=9606 GN=MAT2A	MAT2A	8;4;1	3	61600	159650	575370	203520	173880	446870	113430	180810	193910	717940	0.0292212	0.103059	-0.674113	TB-EOT	Non significant
P31689	P31689;P31689-2	>SP|P31689|DNJA1_HUMAN DnaJ homolog subfamily A member 1 OS=Homo sapiens OX=9606 GN=DNAJA1 PE=1 SV=2;>SP|P31689-2|DNJA1_HUMAN Isoform 2 of DnaJ homolog subfamily A member 1 OS=Homo sapiens OX=9606 GN=DNAJA1	DNAJA1	4;2	2	7542.7	18099	135370	38310	32482	155690	24393	30852	56963	127720	0.0575541	0.158587	-0.763158	TB-EOT	Non significant
P31939-2	P31939-2;P31939	>SP|P31939-2|PUR9_HUMAN Isoform 2 of Bifunctional purine biosynthesis protein PURH OS=Homo sapiens OX=9606 GN=ATIC;>SP|P31939|PUR9_HUMAN Bifunctional purine biosynthesis protein PURH OS=Homo sapiens OX=9606 GN=ATIC PE=1 SV=3	ATIC	13;13	2	53667	126860	756730	316360	342470	494120	172830	218560	316700	971230	0.350713	0.510952	-0.334551	TB-EOT	Non significant
P31943	P31943;P31942-2;P31942	>SP|P31943|HNRH1_HUMAN Heterogeneous nuclear ribonucleoprotein H OS=Homo sapiens OX=9606 GN=HNRNPH1 PE=1 SV=4	HNRNPH1	2;0;0	3	89432	142740	769680	427930	180640	671610	205160	201190	408220	941070	0.299578	0.463755	-0.358546	TB-EOT	Non significant
P31946-2	P31946-2;P31946	>SP|P31946-2|1433B_HUMAN Isoform Short of 14-3-3 protein beta/alpha OS=Homo sapiens OX=9606 GN=YWHAB;>SP|P31946|1433B_HUMAN 14-3-3 protein beta/alpha OS=Homo sapiens OX=9606 GN=YWHAB PE=1 SV=3	YWHAB	6;6	2	762400	1142600	5018500	1991300	2527700	5896200	1066200	1118600	1977200	8059300	0.0323172	0.108413	-0.635527	TB-EOT	Non significant
P31947-2	P31947-2;P31947	>SP|P31947-2|1433S_HUMAN Isoform 2 of 14-3-3 protein sigma OS=Homo sapiens OX=9606 GN=SFN;>SP|P31947|1433S_HUMAN 14-3-3 protein sigma OS=Homo sapiens OX=9606 GN=SFN PE=1 SV=1	SFN	6;6	2	1232000	2709100	8786700	4305600	3854400	9822900	2186800	2828400	3460300	11608000	0.0566924	0.15678	-0.531999	TB-EOT	Non significant
P31948	P31948;P31948-2;P31948-3	>SP|P31948|STIP1_HUMAN Stress-induced-phosphoprotein 1 OS=Homo sapiens OX=9606 GN=STIP1 PE=1 SV=1;>SP|P31948-2|STIP1_HUMAN Isoform 2 of Stress-induced-phosphoprotein 1 OS=Homo sapiens OX=9606 GN=STIP1;>SP|P31948-3|STIP1_HUMAN Isoform 3 of Stress-induced-phosp	STIP1	20;19;18	3	1076800	1416700	7943400	2349300	2612300	6736900	2042000	2013600	2288100	7866700	0.143379	0.28322	-0.454652	TB-EOT	Non significant
P31949	P31949	>SP|P31949|S10AB_HUMAN Protein S100-A11 OS=Homo sapiens OX=9606 GN=S100A11 PE=1 SV=2	S100A11	6	1	3420700	1010100	1641500	382730	1919600	3205600	207470	457210	1400200	6398700	0.390041	0.540796	-0.678453	TB-EOT	Non significant
P32119	P32119;P32119-2	>SP|P32119|PRDX2_HUMAN Peroxiredoxin-2 OS=Homo sapiens OX=9606 GN=PRDX2 PE=1 SV=5	PRDX2	7;1	2	2660000	661420	7615700	9684800	2657100	2606600	10788000	7441500	8578900	2766600	0.00221939	0.0207098	2.14908	TB-EOT	Upregulated
P32189-1	P32189-1;P32189-4;P32189-2;P32189;Q14409	>SP|P32189-1|GLPK_HUMAN Isoform 1 of Glycerol kinase OS=Homo sapiens OX=9606 GN=GK;>SP|P32189-4|GLPK_HUMAN Isoform 4 of Glycerol kinase OS=Homo sapiens OX=9606 GN=GK;>SP|P32189-2|GLPK_HUMAN Isoform 2 of Glycerol kinase OS=Homo sapiens OX=9606 GN=GK;>SP|P32189|	GK;GK3P	5;5;5;5;5	5	31997	100710	521440	159440	221440	449120	70856	103670	249520	752730	0.0269523	0.0976058	-0.83563	TB-EOT	Non significant
P32455	P32455	>SP|P32455|GBP1_HUMAN Guanylate-binding protein 1 OS=Homo sapiens OX=9606 GN=GBP1 PE=1 SV=2	GBP1	5	1	847760	516300	2400900	1669400	2160000	2242000	807310	1059000	698140	4628400	0.837451	0.896796	0.0806528	TB-EOT	Non significant
P32456	P32456	>SP|P32456|GBP2_HUMAN Guanylate-binding protein 2 OS=Homo sapiens OX=9606 GN=GBP2 PE=1 SV=3	GBP2	2	1	7625	30298	140830	65716	56073	105800	55053	55683	31113	239950	0.242223	0.400893	-0.595423	TB-EOT	Non significant
P32942	P32942	>SP|P32942|ICAM3_HUMAN Intercellular adhesion molecule 3 OS=Homo sapiens OX=9606 GN=ICAM3 PE=1 SV=2	ICAM3	3	1	187350	7352.1	32273	20562	108970	36481	21608	26887	99889	35219	0.0112246	0.055636	2.05355	TB-EOT	Non significant
P33121-2	P33121-2;P33121-3;P33121	>SP|P33121-2|ACSL1_HUMAN Isoform 2 of Long-chain-fatty-acid--CoA ligase 1 OS=Homo sapiens OX=9606 GN=ACSL1;>SP|P33121-3|ACSL1_HUMAN Isoform 3 of Long-chain-fatty-acid--CoA ligase 1 OS=Homo sapiens OX=9606 GN=ACSL1;>SP|P33121|ACSL1_HUMAN Long-chain-fatty-acid-	ACSL1	6;6;6	3	38023	56730	163080	65064	91837	205850	29641	44489	285650	421480	0.267341	0.429837	-0.484949	TB-EOT	Non significant
P33241	P33241;P33241-3;P33241-2	>SP|P33241|LSP1_HUMAN Lymphocyte-specific protein 1 OS=Homo sapiens OX=9606 GN=LSP1 PE=1 SV=1;>SP|P33241-3|LSP1_HUMAN Isoform 3 of Lymphocyte-specific protein 1 OS=Homo sapiens OX=9606 GN=LSP1;>SP|P33241-2|LSP1_HUMAN Isoform 2 of Lymphocyte-specific protein 1	LSP1	11;10;8	3	3140400	1351500	5387900	1396900	2214400	8756000	229280	938580	2318400	10867000	0.0871696	0.205245	-1.12227	TB-EOT	Non significant
P33908	P33908;O60476	>SP|P33908|MA1A1_HUMAN Mannosyl-oligosaccharide 1,2-alpha-mannosidase IA OS=Homo sapiens OX=9606 GN=MAN1A1 PE=1 SV=3	MAN1A1	4;1	2	11592	19490	96376	144930	96443	97921	25513	55405	72633	83231	0.20049	0.352537	0.549303	TB-EOT	Non significant
P34059	P34059;O65931	>SP|P34059|GALNS_HUMAN N-acetylgalactosamine-6-sulfatase OS=Homo sapiens OX=9606 GN=GALNS PE=1 SV=1	GALNS	2;0	2	52731	43916	44789	50187	69901	108920	36982	48389	79404	274820	0.696889	0.792795	0.173469	TB-EOT	Non significant
P34096	P34096	>SP|P34096|RNAS4_HUMAN Ribonuclease 4 OS=Homo sapiens OX=9606 GN=RNASE4 PE=1 SV=3	RNASE4	2	1	5709.2	14464	166860	98683	16138	58887	48188	69521	22842	34935	0.795016	0.868068	0.192172	TB-EOT	Non significant
P34913	P34913;P34913-3;P34913-2	>SP|P34913|HYES_HUMAN Bifunctional epoxide hydrolase 2 OS=Homo sapiens OX=9606 GN=EPHX2 PE=1 SV=2	EPHX2	3;1;1	3	13262	22211	65544	101190	37339	205590	82957	32927	31760	105300	0.95066	0.970439	-0.0338175	TB-EOT	Non significant
P34932	P34932;P34932-2	>SP|P34932|HSP74_HUMAN Heat shock 70 kDa protein 4 OS=Homo sapiens OX=9606 GN=HSPA4 PE=1 SV=4	HSPA4	33;4	2	1610100	1528300	7339700	2730300	1867800	5103200	1327500	1683000	2749600	6635300	0.266485	0.428913	-0.342204	TB-EOT	Non significant
P35080-2	P35080-2;P35080	>SP|P35080-2|PROF2_HUMAN Isoform IIb of Profilin-2 OS=Homo sapiens OX=9606 GN=PFN2;>SP|P35080|PROF2_HUMAN Profilin-2 OS=Homo sapiens OX=9606 GN=PFN2 PE=1 SV=3	PFN2	5;4	2	22968	23172	90005	67975	45093	179720	47532	36279	75863	84849	0.678755	0.780927	0.143432	TB-EOT	Non significant
P35237	P35237	>SP|P35237|SPB6_HUMAN Serpin B6 OS=Homo sapiens OX=9606 GN=SERPINB6 PE=1 SV=3	SERPINB6	14	1	336660	580490	4660800	2634900	1606700	5234000	1934000	1527800	1816800	5040900	0.66524	0.769453	-0.192757	TB-EOT	Non significant
P35241	P35241;P35241-5;P35241-4;P35241-2;P35241-3	>SP|P35241|RADI_HUMAN Radixin OS=Homo sapiens OX=9606 GN=RDX PE=1 SV=1;>SP|P35241-5|RADI_HUMAN Isoform 5 of Radixin OS=Homo sapiens OX=9606 GN=RDX;>SP|P35241-4|RADI_HUMAN Isoform 4 of Radixin OS=Homo sapiens OX=9606 GN=RDX	RDX	9;9;7;6;1	5	848880	407200	1962800	1420000	1581200	2812700	443610	866790	982480	3483400	0.915967	0.946458	0.0360796	TB-EOT	Non significant
P35247	P35247	>SP|P35247|SFTPD_HUMAN Pulmonary surfactant-associated protein D OS=Homo sapiens OX=9606 GN=SFTPD PE=1 SV=3	SFTPD	5	1	244710	134030	187590	229650	156300	325100	18017	130680	103390	98280	0.687296	0.787329	0.28858	TB-EOT	Non significant
P35268	P35268	>SP|P35268|RL22_HUMAN 60S ribosomal protein L22 OS=Homo sapiens OX=9606 GN=RPL22 PE=1 SV=2	RPL22	3	1	22943	396140	1673600	99708	52537	244170	36916	44125	53606	538800	0.000252422	0.0063594	-2.68049	TB-EOT	Downregulated
P35573-2	P35573-2;P35573-3;P35573	>SP|P35573-2|GDE_HUMAN Isoform 5 of Glycogen debranching enzyme OS=Homo sapiens OX=9606 GN=AGL;>SP|P35573-3|GDE_HUMAN Isoform 6 of Glycogen debranching enzyme OS=Homo sapiens OX=9606 GN=AGL;>SP|P35573|GDE_HUMAN Glycogen debranching enzyme OS=Homo sapiens OX=9	AGL	4;4;4	3	6085.9	13377	67960	26185	30436	66404	31977	27048	36814	73068	0.741491	0.828052	-0.127079	TB-EOT	Non significant
P35579	P35579;P35579-2;P35749-4;P35749-3;P35749;P35749-2;P35580;P35580-5;P35580-2;P35580-3;P35580-4	>SP|P35579|MYH9_HUMAN Myosin-9 OS=Homo sapiens OX=9606 GN=MYH9 PE=1 SV=4;>SP|P35579-2|MYH9_HUMAN Isoform 2 of Myosin-9 OS=Homo sapiens OX=9606 GN=MYH9	MYH9	66;42;7;7;7;7;5;5;5;5;5	11	15374000	2729400	16276000	4460100	25752000	11282000	2979700	4903300	8689900	8753300	0.19826	0.350236	0.794982	TB-EOT	Non significant
P35606-2	P35606-2;P35606	>SP|P35606-2|COPB2_HUMAN Isoform 2 of Coatomer subunit beta OS=Homo sapiens OX=9606 GN=COPB2;>SP|P35606|COPB2_HUMAN Coatomer subunit beta OS=Homo sapiens OX=9606 GN=COPB2 PE=1 SV=2	COPB2	11;11	2	106530	192100	759320	271520	298660	691470	103850	208290	624070	995050	0.127104	0.264106	-0.491133	TB-EOT	Non significant
P35754	P35754	>SP|P35754|GLRX1_HUMAN Glutaredoxin-1 OS=Homo sapiens OX=9606 GN=GLRX PE=1 SV=2	GLRX	5	1	476060	312600	902450	285690	501020	1081100	234920	131220	366560	1987400	0.157896	0.304258	-0.685893	TB-EOT	Non significant
P35998	P35998;P35998-2	>SP|P35998|PRS7_HUMAN 26S proteasome regulatory subunit 7 OS=Homo sapiens OX=9606 GN=PSMC2 PE=1 SV=3;>SP|P35998-2|PRS7_HUMAN Isoform 2 of 26S proteasome regulatory subunit 7 OS=Homo sapiens OX=9606 GN=PSMC2	PSMC2	6;3	2	24320	60414	232010	94318	94199	183920	44881	64949	74731	245260	0.0642197	0.170171	-0.54263	TB-EOT	Non significant
P36222	P36222	>SP|P36222|CH3L1_HUMAN Chitinase-3-like protein 1 OS=Homo sapiens OX=9606 GN=CHI3L1 PE=1 SV=2	CHI3L1	8	1	62600	15426	303300	206220	518880	227210	125130	124880	322680	100450	0.00561313	0.0363332	1.67999	TB-EOT	Upregulated
P36268-2	P36268-2;A6NGU5;P36268;P19440;P36268-3;P19440-2	>SP|P36268-2|GGT2_HUMAN Isoform 2 of Inactive glutathione hydrolase 2 OS=Homo sapiens OX=9606 GN=GGT2;>SP|A6NGU5|GGT3_HUMAN Putative glutathione hydrolase 3 proenzyme OS=Homo sapiens OX=9606 GN=GGT3P PE=5 SV=2;>SP|P36268|GGT2_HUMAN Inactive glutathione hydrol	GGT2;GGT3P;GGT1	2;2;2;2;2;1	6	24198	16514	48824	57079	69419	93912	12227	28523	36238	103490	0.653052	0.758818	0.16099	TB-EOT	Non significant
P36405	P36405	>SP|P36405|ARL3_HUMAN ADP-ribosylation factor-like protein 3 OS=Homo sapiens OX=9606 GN=ARL3 PE=1 SV=2	ARL3	4	1	16703	5841.4	108420	80383	40500	71238	37779	45027	97485	43972	0.0278982	0.0999752	1.13905	TB-EOT	Non significant
P36543-2	P36543-2;P36543;P36543-3;Q96A05	>SP|P36543-2|VATE1_HUMAN Isoform 2 of V-type proton ATPase subunit E 1 OS=Homo sapiens OX=9606 GN=ATP6V1E1;>SP|P36543|VATE1_HUMAN V-type proton ATPase subunit E 1 OS=Homo sapiens OX=9606 GN=ATP6V1E1 PE=1 SV=1;>SP|P36543-3|VATE1_HUMAN Isoform 3 of V-type proto	ATP6V1E1	6;6;5;2	4	28624	150180	626950	97175	194910	540910	21675	86665	61059	1308200	0.000237659	0.00634174	-2.15553	TB-EOT	Downregulated
P36578	P36578	>SP|P36578|RL4_HUMAN 60S ribosomal protein L4 OS=Homo sapiens OX=9606 GN=RPL4 PE=1 SV=5	RPL4	5	1	64589	179510	230420	110420	68723	569380	12739	49950	72759	820830	0.00163566	0.0171575	-1.95164	TB-EOT	Downregulated
P36871	P36871;P36871-2;P36871-3	>SP|P36871|PGM1_HUMAN Phosphoglucomutase-1 OS=Homo sapiens OX=9606 GN=PGM1 PE=1 SV=3;>SP|P36871-2|PGM1_HUMAN Isoform 2 of Phosphoglucomutase-1 OS=Homo sapiens OX=9606 GN=PGM1;>SP|P36871-3|PGM1_HUMAN Isoform 3 of Phosphoglucomutase-1 OS=Homo sapiens OX=9606 GN	PGM1	22;18;14	3	290790	510180	2646700	3976400	1150600	3307400	1740100	2492500	1012800	4485800	0.718136	0.8091	0.200764	TB-EOT	Non significant
P36873	P36873;P36873-2	>SP|P36873|PP1G_HUMAN Serine/threonine-protein phosphatase PP1-gamma catalytic subunit OS=Homo sapiens OX=9606 GN=PPP1CC PE=1 SV=1;>SP|P36873-2|PP1G_HUMAN Isoform 2 of Serine/threonine-protein phosphatase PP1-gamma catalytic subunit OS=Homo sapiens OX=9606 G	PPP1CC	2;2	2	1634800	24434	167600	49784	116330	74834	17938	14453	3525900	147340	0.260918	0.42354	1.66303	TB-EOT	Non significant
P36952	P36952	>SP|P36952|SPB5_HUMAN Serpin B5 OS=Homo sapiens OX=9606 GN=SERPINB5 PE=1 SV=2	SERPINB5	4	1	24744	47687	213370	168920	99290	166720	107410	132820	217420	118520	0.129401	0.265541	0.666167	TB-EOT	Non significant
P36955	P36955;CON__Q95121	>SP|P36955|PEDF_HUMAN Pigment epithelium-derived factor OS=Homo sapiens OX=9606 GN=SERPINF1 PE=1 SV=4	SERPINF1	9;4	2	289240	818670	3516700	3264100	4261200	2574200	1093600	3150600	5770600	2279200	0.102218	0.228302	0.891409	TB-EOT	Non significant
P36969-2	P36969-2;P36969	>SP|P36969-2|GPX4_HUMAN Isoform Cytoplasmic of Phospholipid hydroperoxide glutathione peroxidase OS=Homo sapiens OX=9606 GN=GPX4;>SP|P36969|GPX4_HUMAN Phospholipid hydroperoxide glutathione peroxidase OS=Homo sapiens OX=9606 GN=GPX4 PE=1 SV=3	GPX4	4;4	2	49702	58984	142960	74403	86873	224460	44903	51186	80635	326960	0.121889	0.257491	-0.478387	TB-EOT	Non significant
P36980-2	P36980-2;P36980	>SP|P36980-2|FHR2_HUMAN Isoform Short of Complement factor H-related protein 2 OS=Homo sapiens OX=9606 GN=CFHR2;>SP|P36980|FHR2_HUMAN Complement factor H-related protein 2 OS=Homo sapiens OX=9606 GN=CFHR2 PE=1 SV=1	CFHR2	4;4	2	177310	302190	199610	274820	256900	310930	213000	422000	189670	209770	0.148329	0.29224	0.822429	TB-EOT	Non significant
P37235	P37235;P84074;P61601	>SP|P37235|HPCL1_HUMAN Hippocalcin-like protein 1 OS=Homo sapiens OX=9606 GN=HPCAL1 PE=1 SV=3;>SP|P84074|HPCA_HUMAN Neuron-specific calcium-binding protein hippocalcin OS=Homo sapiens OX=9606 GN=HPCA PE=1 SV=2;>SP|P61601|NCALD_HUMAN Neurocalcin-delta OS=Homo	HPCAL1;HPCA;NCALD	7;5;4	3	320250	160630	458490	242460	248780	752500	197610	159660	240200	1006500	0.588107	0.710046	-0.224602	TB-EOT	Non significant
P37802	P37802;P37802-2	>SP|P37802|TAGL2_HUMAN Transgelin-2 OS=Homo sapiens OX=9606 GN=TAGLN2 PE=1 SV=3;>SP|P37802-2|TAGL2_HUMAN Isoform 2 of Transgelin-2 OS=Homo sapiens OX=9606 GN=TAGLN2	TAGLN2	11;11	2	517710	959010	5041300	3386800	1651800	5287100	1404300	1509500	1003400	4474900	0.312698	0.477369	-0.414924	TB-EOT	Non significant
P37837	P37837	>SP|P37837|TALDO_HUMAN Transaldolase OS=Homo sapiens OX=9606 GN=TALDO1 PE=1 SV=2	TALDO1	16	1	6278000	8991900	23410000	11072000	17245000	32320000	6939600	7046400	27971000	47864000	0.386141	0.539792	-0.280071	TB-EOT	Non significant
P38571-2	P38571-2;P38571	>SP|P38571-2|LICH_HUMAN Isoform 2 of Lysosomal acid lipase/cholesteryl ester hydrolase OS=Homo sapiens OX=9606 GN=LIPA;>SP|P38571|LICH_HUMAN Lysosomal acid lipase/cholesteryl ester hydrolase OS=Homo sapiens OX=9606 GN=LIPA PE=1 SV=2	LIPA	4;4	2	23329	523300	761490	128120	182280	1530600	6590.6	142070	102180	3320300	0.000262638	0.0063594	-3.4294	TB-EOT	Downregulated
P38606-2	P38606-2;P38606	>SP|P38606-2|VATA_HUMAN Isoform 2 of V-type proton ATPase catalytic subunit A OS=Homo sapiens OX=9606 GN=ATP6V1A;>SP|P38606|VATA_HUMAN V-type proton ATPase catalytic subunit A OS=Homo sapiens OX=9606 GN=ATP6V1A PE=1 SV=2	ATP6V1A	18;18	2	167880	689020	4227300	732670	1203600	2249800	191790	518620	719570	5626600	0.00139572	0.0156095	-1.53715	TB-EOT	Downregulated
P38646	P38646	>SP|P38646|GRP75_HUMAN Stress-70 protein, mitochondrial OS=Homo sapiens OX=9606 GN=HSPA9 PE=1 SV=2	HSPA9	5	1	50532	37421	104060	88577	79395	146800	37786	53001	76754	226410	0.822948	0.887387	0.0652687	TB-EOT	Non significant
P39019	P39019	>SP|P39019|RS19_HUMAN 40S ribosomal protein S19 OS=Homo sapiens OX=9606 GN=RPS19 PE=1 SV=2	RPS19	3	1	28837	42534	124330	36375	34998	77992	21165	30527	86285	205610	0.130878	0.266845	-0.571955	TB-EOT	Non significant
P39023	P39023;Q92901	>SP|P39023|RL3_HUMAN 60S ribosomal protein L3 OS=Homo sapiens OX=9606 GN=RPL3 PE=1 SV=2	RPL3	7;1	2	85433	335810	439010	247650	140540	721480	68859	147410	177930	1187800	0.00216345	0.0205663	-1.31425	TB-EOT	Downregulated
P39687	P39687;O95626;O43423	>SP|P39687|AN32A_HUMAN Acidic leucine-rich nuclear phosphoprotein 32 family member A OS=Homo sapiens OX=9606 GN=ANP32A PE=1 SV=1	ANP32A	8;2;2	3	1003000	1275000	1633300	1764600	815430	7496200	1519900	1179500	1145600	8306900	0.227447	0.384385	-0.636084	TB-EOT	Non significant
P40121	P40121;P40121-2	>SP|P40121|CAPG_HUMAN Macrophage-capping protein OS=Homo sapiens OX=9606 GN=CAPG PE=1 SV=2;>SP|P40121-2|CAPG_HUMAN Isoform 2 of Macrophage-capping protein OS=Homo sapiens OX=9606 GN=CAPG	CAPG	11;10	2	1098600	1992100	10592000	2159800	4048800	10013000	560480	1018300	756420	13840000	0.00289386	0.0229248	-1.67906	TB-EOT	Downregulated
P40189	P40189;P40189-3;P40189-2	>SP|P40189|IL6RB_HUMAN Interleukin-6 receptor subunit beta OS=Homo sapiens OX=9606 GN=IL6ST PE=1 SV=2;>SP|P40189-3|IL6RB_HUMAN Isoform 3 of Interleukin-6 receptor subunit beta OS=Homo sapiens OX=9606 GN=IL6ST	IL6ST	6;5;2	3	132970	177650	235350	641380	236990	401730	153890	275030	225560	238430	0.0825046	0.198874	0.791788	TB-EOT	Non significant
P40199	P40199	>SP|P40199|CEAM6_HUMAN Carcinoembryonic antigen-related cell adhesion molecule 6 OS=Homo sapiens OX=9606 GN=CEACAM6 PE=1 SV=3	CEACAM6	3	1	123980	30187	146430	133520	116920	220970	43654	63784	587110	139930	0.0661135	0.173677	1.02162	TB-EOT	Non significant
P40222	P40222	>SP|P40222|TXLNA_HUMAN Alpha-taxilin OS=Homo sapiens OX=9606 GN=TXLNA PE=1 SV=3	TXLNA	2	1	5372.7	9577.3	36950	11748	32118	26471	6806.8	10008	47226	36430	0.930591	0.957017	0.0350284	TB-EOT	Non significant
P40227-2	P40227-2;P40227;Q92526-2;Q92526;Q92526-3	>SP|P40227-2|TCPZ_HUMAN Isoform 2 of T-complex protein 1 subunit zeta OS=Homo sapiens OX=9606 GN=CCT6A;>SP|P40227|TCPZ_HUMAN T-complex protein 1 subunit zeta OS=Homo sapiens OX=9606 GN=CCT6A PE=1 SV=3	CCT6A	8;8;2;2;1	5	51727	203110	846820	275230	409960	773340	137820	251070	292280	886980	0.0511554	0.144893	-0.713178	TB-EOT	Non significant
P40306	P40306	>SP|P40306|PSB10_HUMAN Proteasome subunit beta type-10 OS=Homo sapiens OX=9606 GN=PSMB10 PE=1 SV=1	PSMB10	2	1	49658	37171	230080	124940	149800	154690	77889	77278	110770	309760	0.444348	0.589236	0.233544	TB-EOT	Non significant
P40394	P40394;P40394-2	>SP|P40394|ADH7_HUMAN Alcohol dehydrogenase class 4 mu/sigma chain OS=Homo sapiens OX=9606 GN=ADH7 PE=1 SV=2;>SP|P40394-2|ADH7_HUMAN Isoform 2 of Alcohol dehydrogenase class 4 mu/sigma chain OS=Homo sapiens OX=9606 GN=ADH7	ADH7	14;13	2	244430	3042700	13625000	3428200	877540	24692000	382220	2187800	2157100	7547400	0.00144267	0.0160168	-2.3036	TB-EOT	Downregulated
P40429	P40429;Q6NVV1	>SP|P40429|RL13A_HUMAN 60S ribosomal protein L13a OS=Homo sapiens OX=9606 GN=RPL13A PE=1 SV=2;>SP|Q6NVV1|R13P3_HUMAN Putative 60S ribosomal protein L13a protein RPL13AP3 OS=Homo sapiens OX=9606 GN=RPL13AP3 PE=5 SV=1	RPL13A;RPL13AP3	3;2	2	27361	276800	327130	168820	92462	626500	33827	93100	92417	1124100	0.00027595	0.0063594	-1.97318	TB-EOT	Downregulated
P40763-3	P40763-3;P40763-2;P40763	>SP|P40763-3|STAT3_HUMAN Isoform 3 of Signal transducer and activator of transcription 3 OS=Homo sapiens OX=9606 GN=STAT3;>SP|P40763-2|STAT3_HUMAN Isoform Del-701 of Signal transducer and activator of transcription 3 OS=Homo sapiens OX=9606 GN=STAT3;>SP|P4076	STAT3	6;6;6	3	12208	25859	196710	82856	67357	200760	11716	64118	62007	172320	0.111642	0.241546	-0.729774	TB-EOT	Non significant
P40925	P40925;P40925-3;P40925-2	>SP|P40925|MDHC_HUMAN Malate dehydrogenase, cytoplasmic OS=Homo sapiens OX=9606 GN=MDH1 PE=1 SV=4;>SP|P40925-3|MDHC_HUMAN Isoform 3 of Malate dehydrogenase, cytoplasmic OS=Homo sapiens OX=9606 GN=MDH1;>SP|P40925-2|MDHC_HUMAN Isoform 2 of Malate dehydrogenase,	MDH1	16;16;13	3	403210	2695500	9389900	2655800	1965400	10018000	2637000	2506800	1855200	16243000	0.00830423	0.0464365	-1.36299	TB-EOT	Downregulated
P40926-2	P40926-2;P40926	>SP|P40926-2|MDHM_HUMAN Isoform 2 of Malate dehydrogenase, mitochondrial OS=Homo sapiens OX=9606 GN=MDH2;>SP|P40926|MDHM_HUMAN Malate dehydrogenase, mitochondrial OS=Homo sapiens OX=9606 GN=MDH2 PE=1 SV=3	MDH2	3;3	2	148850	36909	79209	68210	127150	117230	89792	34578	139220	257420	0.168129	0.316882	0.762267	TB-EOT	Non significant
P40939	P40939	>SP|P40939|ECHA_HUMAN Trifunctional enzyme subunit alpha, mitochondrial OS=Homo sapiens OX=9606 GN=HADHA PE=1 SV=2	HADHA	4	1	4026.1	10526	30761	15515	11606	25082	5416.3	4857.2	5813.2	98681	0.00953682	0.051621	-1.25261	TB-EOT	Non significant
P41208	P41208;Q12798	>SP|P41208|CETN2_HUMAN Centrin-2 OS=Homo sapiens OX=9606 GN=CETN2 PE=1 SV=1	CETN2	4;1	2	355360	44554	171780	149900	136200	284810	49646	74266	407150	183390	0.12954	0.265541	0.931752	TB-EOT	Non significant
P41218	P41218	>SP|P41218|MNDA_HUMAN Myeloid cell nuclear differentiation antigen OS=Homo sapiens OX=9606 GN=MNDA PE=1 SV=1	MNDA	7	1	73700	67165	400180	158510	497020	209150	75562	94782	242330	369600	0.419745	0.563953	0.318614	TB-EOT	Non significant
P41226	P41226	>SP|P41226|UBA7_HUMAN Ubiquitin-like modifier-activating enzyme 7 OS=Homo sapiens OX=9606 GN=UBA7 PE=1 SV=2	UBA7	6	1	6986.3	19057	94535	50238	58606	93635	16076	30819	37761	184290	0.124196	0.260195	-0.611842	TB-EOT	Non significant
P41236	P41236;Q6NXS1	>SP|P41236|IPP2_HUMAN Protein phosphatase inhibitor 2 OS=Homo sapiens OX=9606 GN=PPP1R2 PE=1 SV=2;>SP|Q6NXS1|IPP2B_HUMAN Protein phosphatase inhibitor 2 family member B OS=Homo sapiens OX=9606 GN=PPP1R2B PE=1 SV=2	PPP1R2;PPP1R2P3	4;3	2	370690	102860	601150	373480	282350	765480	121670	157210	394390	649180	0.702229	0.797678	0.158835	TB-EOT	Non significant
P41240	P41240	>SP|P41240|CSK_HUMAN Tyrosine-protein kinase CSK OS=Homo sapiens OX=9606 GN=CSK PE=1 SV=1	CSK	8	1	61586	164240	542630	328180	299500	476630	125230	179210	185090	847220	0.135104	0.273005	-0.490136	TB-EOT	Non significant
P41250	P41250	>SP|P41250|GARS_HUMAN Glycine--tRNA ligase OS=Homo sapiens OX=9606 GN=GARS PE=1 SV=3	GARS	7	1	32797	121870	268520	122090	201010	396400	76281	93389	169230	437110	0.0664518	0.174264	-0.606226	TB-EOT	Non significant
P41252	P41252	>SP|P41252|SYIC_HUMAN Isoleucine--tRNA ligase, cytoplasmic OS=Homo sapiens OX=9606 GN=IARS PE=1 SV=2	IARS	2	1	7428.8	9498.9	36713	11317	25749	35375	7315.4	14210	20156	41723	0.488577	0.626053	-0.200522	TB-EOT	Non significant
P42224	P42224;P42224-2	>SP|P42224|STAT1_HUMAN Signal transducer and activator of transcription 1-alpha/beta OS=Homo sapiens OX=9606 GN=STAT1 PE=1 SV=2;>SP|P42224-2|STAT1_HUMAN Isoform Beta of Signal transducer and activator of transcription 1-alpha/beta OS=Homo sapiens OX=9606 GN=	STAT1	16;15	2	126470	294080	1145100	347630	798600	1184700	189390	374740	325850	1411600	0.0652857	0.172104	-0.646604	TB-EOT	Non significant
P42330	P42330;P42330-2	>SP|P42330|AK1C3_HUMAN Aldo-keto reductase family 1 member C3 OS=Homo sapiens OX=9606 GN=AKR1C3 PE=1 SV=4;>SP|P42330-2|AK1C3_HUMAN Isoform 2 of Aldo-keto reductase family 1 member C3 OS=Homo sapiens OX=9606 GN=AKR1C3	AKR1C3	3;2	2	37147	108340	651160	167880	77290	1116100	3801.5	91909	147800	1033700	0.00591214	0.0377036	-2.44788	TB-EOT	Downregulated
P42566-2	P42566-2;P42566	>SP|P42566-2|EPS15_HUMAN Isoform 2 of Epidermal growth factor receptor substrate 15 OS=Homo sapiens OX=9606 GN=EPS15;>SP|P42566|EPS15_HUMAN Epidermal growth factor receptor substrate 15 OS=Homo sapiens OX=9606 GN=EPS15 PE=1 SV=2	EPS15	2;2	2	12563	5404	14906	11256	14364	22575	3945.5	7548.1	16014	24977	0.41954	0.563953	0.303872	TB-EOT	Non significant
P42574	P42574	>SP|P42574|CASP3_HUMAN Caspase-3 OS=Homo sapiens OX=9606 GN=CASP3 PE=1 SV=2	CASP3	4	1	39780	85413	584870	151910	231470	308230	123990	99172	317930	466650	0.462757	0.605176	-0.275886	TB-EOT	Non significant
P42766	P42766	>SP|P42766|RL35_HUMAN 60S ribosomal protein L35 OS=Homo sapiens OX=9606 GN=RPL35 PE=1 SV=2	RPL35	2	1	11220	104540	78302	47134	29415	477080	18876	54659	49938	901160	0.00200797	0.0195019	-2.14112	TB-EOT	Downregulated
P42785	P42785;P42785-2	>SP|P42785|PCP_HUMAN Lysosomal Pro-X carboxypeptidase OS=Homo sapiens OX=9606 GN=PRCP PE=1 SV=1;>SP|P42785-2|PCP_HUMAN Isoform 2 of Lysosomal Pro-X carboxypeptidase OS=Homo sapiens OX=9606 GN=PRCP	PRCP	2;2	2	44232	10286	49825	25051	53627	73589	10649	19170	82866	179870	0.755253	0.836664	0.168076	TB-EOT	Non significant
P42858	P42858	>SP|P42858|HD_HUMAN Huntingtin OS=Homo sapiens OX=9606 GN=HTT PE=1 SV=2	HTT	2	1	1506.7	2989.1	7285.7	4117.6	6586.8	7159.2	2940.1	3951.1	5155.6	7480.9	0.529742	0.662069	0.186571	TB-EOT	Non significant
P43034	P43034;P43034-2	>SP|P43034|LIS1_HUMAN Platelet-activating factor acetylhydrolase IB subunit alpha OS=Homo sapiens OX=9606 GN=PAFAH1B1 PE=1 SV=2	PAFAH1B1	3;1	2	12683	16635	136970	34227	38202	82446	20563	32150	64497	140700	0.222825	0.378677	-0.407026	TB-EOT	Non significant
P43251-4	P43251-4;P43251;P43251-3;P43251-2	>SP|P43251-4|BTD_HUMAN Isoform 4 of Biotinidase OS=Homo sapiens OX=9606 GN=BTD;>SP|P43251|BTD_HUMAN Biotinidase OS=Homo sapiens OX=9606 GN=BTD PE=1 SV=2;>SP|P43251-3|BTD_HUMAN Isoform 3 of Biotinidase OS=Homo sapiens OX=9606 GN=BTD;>SP|P43251-2|BTD_HUMAN Isofo	BTD	8;8;8;8	4	379960	215790	1073100	2434800	1627400	980790	565400	932130	1627800	633860	0.000365015	0.00750254	1.61794	TB-EOT	Upregulated
P43353	P43353;P43353-2;P48448	>SP|P43353|AL3B1_HUMAN Aldehyde dehydrogenase family 3 member B1 OS=Homo sapiens OX=9606 GN=ALDH3B1 PE=1 SV=1;>SP|P43353-2|AL3B1_HUMAN Isoform 2 of Aldehyde dehydrogenase family 3 member B1 OS=Homo sapiens OX=9606 GN=ALDH3B1	ALDH3B1	9;8;2	3	118650	303160	1420500	808420	925620	2690300	208630	339550	557910	2479000	0.0359259	0.114691	-0.882294	TB-EOT	Non significant
P43487-2	P43487-2;P43487;Q9C010;Q9C010-2	>SP|P43487-2|RANG_HUMAN Isoform 2 of Ran-specific GTPase-activating protein OS=Homo sapiens OX=9606 GN=RANBP1;>SP|P43487|RANG_HUMAN Ran-specific GTPase-activating protein OS=Homo sapiens OX=9606 GN=RANBP1 PE=1 SV=1	RANBP1	5;5;1;1	4	87439	185010	777030	438860	363970	852090	356970	373170	358500	789560	0.869589	0.914091	-0.0584711	TB-EOT	Non significant
P43490	P43490	>SP|P43490|NAMPT_HUMAN Nicotinamide phosphoribosyltransferase OS=Homo sapiens OX=9606 GN=NAMPT PE=1 SV=1	NAMPT	11	1	122570	317930	1996600	421840	1778700	1116200	216670	356330	1035600	2903600	0.240904	0.399145	-0.584079	TB-EOT	Non significant
P43652	P43652;CON__REFSEQ:XP_585019	>SP|P43652|AFAM_HUMAN Afamin OS=Homo sapiens OX=9606 GN=AFM PE=1 SV=1	AFM	22;3	2	2356000	6043800	5295100	11774000	3616500	2784000	3286500	9024700	6278500	2911300	0.066063	0.173677	1.2175	TB-EOT	Non significant
P43686-2	P43686-2;P43686	>SP|P43686-2|PRS6B_HUMAN Isoform 2 of 26S proteasome regulatory subunit 6B OS=Homo sapiens OX=9606 GN=PSMC4;>SP|P43686|PRS6B_HUMAN 26S proteasome regulatory subunit 6B OS=Homo sapiens OX=9606 GN=PSMC4 PE=1 SV=2	PSMC4	5;5	2	12363	55615	262080	89363	96043	179200	25649	57626	91053	239340	0.0370678	0.117214	-0.825342	TB-EOT	Non significant
P45974-2	P45974-2;P45974;Q92995-2;Q92995	>SP|P45974-2|UBP5_HUMAN Isoform Short of Ubiquitin carboxyl-terminal hydrolase 5 OS=Homo sapiens OX=9606 GN=USP5;>SP|P45974|UBP5_HUMAN Ubiquitin carboxyl-terminal hydrolase 5 OS=Homo sapiens OX=9606 GN=USP5 PE=1 SV=2	USP5	14;14;1;1	4	107210	622700	1589800	837720	786450	1533900	435120	709240	595800	1995400	0.151855	0.296879	-0.586953	TB-EOT	Non significant
P46108-2	P46108-2;P46108	>SP|P46108-2|CRK_HUMAN Isoform Crk-I of Adapter molecule crk OS=Homo sapiens OX=9606 GN=CRK;>SP|P46108|CRK_HUMAN Adapter molecule crk OS=Homo sapiens OX=9606 GN=CRK PE=1 SV=2	CRK	2;2	2	21673	12045	52295	56855	19609	59392	18037	28520	52832	59646	0.192256	0.34517	0.466737	TB-EOT	Non significant
P46109	P46109	>SP|P46109|CRKL_HUMAN Crk-like protein OS=Homo sapiens OX=9606 GN=CRKL PE=1 SV=1	CRKL	3	1	25022	17595	95308	52907	24178	94575	41022	35610	50063	116390	0.977744	0.986173	0.0102796	TB-EOT	Non significant
P46459-2	P46459-2;P46459	>SP|P46459-2|NSF_HUMAN Isoform 2 of Vesicle-fusing ATPase OS=Homo sapiens OX=9606 GN=NSF;>SP|P46459|NSF_HUMAN Vesicle-fusing ATPase OS=Homo sapiens OX=9606 GN=NSF PE=1 SV=3	NSF	7;7	2	45466	36883	197890	68001	163390	185450	28827	63820	127370	230510	0.841368	0.897919	-0.0661493	TB-EOT	Non significant
P46777	P46777	>SP|P46777|RL5_HUMAN 60S ribosomal protein L5 OS=Homo sapiens OX=9606 GN=RPL5 PE=1 SV=3	RPL5	7	1	110890	654160	1293400	401090	369550	2323000	126800	312220	492410	3820400	8.28395e-05	0.00456573	-1.80443	TB-EOT	Downregulated
P46779	P46779;P46779-2;P46779-3;P46779-4;P46779-5	>SP|P46779|RL28_HUMAN 60S ribosomal protein L28 OS=Homo sapiens OX=9606 GN=RPL28 PE=1 SV=3;>SP|P46779-2|RL28_HUMAN Isoform 2 of 60S ribosomal protein L28 OS=Homo sapiens OX=9606 GN=RPL28;>SP|P46779-3|RL28_HUMAN Isoform 3 of 60S ribosomal protein L28 OS=Homo s	RPL28	4;4;4;3;3	5	39207	236580	244260	82551	83457	488660	13057	57765	122230	981970	0.000709719	0.0108941	-2.0594	TB-EOT	Downregulated
P46781	P46781	>SP|P46781|RS9_HUMAN 40S ribosomal protein S9 OS=Homo sapiens OX=9606 GN=RPS9 PE=1 SV=3	RPS9	9	1	99168	905640	1284600	451880	345230	2893100	57416	283140	372650	4567800	0.000115138	0.00460856	-2.35848	TB-EOT	Downregulated
P46782	P46782	>SP|P46782|RS5_HUMAN 40S ribosomal protein S5 OS=Homo sapiens OX=9606 GN=RPS5 PE=1 SV=4	RPS5	5	1	27537	459160	545910	140960	106710	625920	35282	70908	205760	1530200	8.65993e-05	0.00456573	-2.32157	TB-EOT	Downregulated
P46926	P46926;P46926-2;Q8TDQ7-3;Q8TDQ7-2;Q8TDQ7;Q8TDQ7-4;Q8TDQ7-5	>SP|P46926|GNPI1_HUMAN Glucosamine-6-phosphate isomerase 1 OS=Homo sapiens OX=9606 GN=GNPDA1 PE=1 SV=1;>SP|P46926-2|GNPI1_HUMAN Isoform 2 of Glucosamine-6-phosphate isomerase 1 OS=Homo sapiens OX=9606 GN=GNPDA1	GNPDA1	7;6;3;3;3;1;1	7	40268	65609	551210	274020	264740	461720	114610	160410	240140	937420	0.38731	0.539792	-0.350401	TB-EOT	Non significant
P46940	P46940;Q86VI3	>SP|P46940|IQGA1_HUMAN Ras GTPase-activating-like protein IQGAP1 OS=Homo sapiens OX=9606 GN=IQGAP1 PE=1 SV=1	IQGAP1	65;1	2	3064500	4934700	19386000	5994500	6023900	19884000	1220100	3534000	3195700	30432000	0.00275747	0.0223091	-1.33549	TB-EOT	Downregulated
P46976-3	P46976-3;P46976-2;P46976	>SP|P46976-3|GLYG_HUMAN Isoform GN-1S of Glycogenin-1 OS=Homo sapiens OX=9606 GN=GYG1;>SP|P46976-2|GLYG_HUMAN Isoform GN-1 of Glycogenin-1 OS=Homo sapiens OX=9606 GN=GYG1;>SP|P46976|GLYG_HUMAN Glycogenin-1 OS=Homo sapiens OX=9606 GN=GYG1 PE=1 SV=4	GYG1	2;2;2	3	46597	32792	277660	75267	294370	229160	36221	57900	136060	324790	0.767472	0.845888	-0.126669	TB-EOT	Non significant
P47755	P47755;P47755-2	>SP|P47755|CAZA2_HUMAN F-actin-capping protein subunit alpha-2 OS=Homo sapiens OX=9606 GN=CAPZA2 PE=1 SV=3;>SP|P47755-2|CAZA2_HUMAN Isoform 2 of F-actin-capping protein subunit alpha-2 OS=Homo sapiens OX=9606 GN=CAPZA2	CAPZA2	7;5	2	55230	44550	418170	170920	237250	370570	84132	167050	179580	570710	0.884513	0.924636	-0.0511954	TB-EOT	Non significant
P47756-2	P47756-2;P47756	>SP|P47756-2|CAPZB_HUMAN Isoform 2 of F-actin-capping protein subunit beta OS=Homo sapiens OX=9606 GN=CAPZB;>SP|P47756|CAPZB_HUMAN F-actin-capping protein subunit beta OS=Homo sapiens OX=9606 GN=CAPZB PE=1 SV=4	CAPZB	12;10	2	700780	1845800	7468500	2742100	3060700	7488000	1733900	1868900	1719500	10501000	0.0198939	0.0783904	-0.824116	TB-EOT	Non significant
P48147	P48147	>SP|P48147|PPCE_HUMAN Prolyl endopeptidase OS=Homo sapiens OX=9606 GN=PREP PE=1 SV=2	PREP	15	1	131810	222010	1471800	762990	704150	1570900	239580	453400	404520	2055200	0.138795	0.277043	-0.549951	TB-EOT	Non significant
P48163	P48163;P48163-2;Q16798	>SP|P48163|MAOX_HUMAN NADP-dependent malic enzyme OS=Homo sapiens OX=9606 GN=ME1 PE=1 SV=1;>SP|P48163-2|MAOX_HUMAN Isoform 2 of NADP-dependent malic enzyme OS=Homo sapiens OX=9606 GN=ME1	ME1	11;8;1	3	70577	302990	1128400	548670	268720	1647900	154370	305030	319480	1907500	0.00284759	0.0227714	-1.2755	TB-EOT	Downregulated
P48426-2	P48426-2;P48426	>SP|P48426-2|PI42A_HUMAN Isoform 2 of Phosphatidylinositol 5-phosphate 4-kinase type-2 alpha OS=Homo sapiens OX=9606 GN=PIP4K2A;>SP|P48426|PI42A_HUMAN Phosphatidylinositol 5-phosphate 4-kinase type-2 alpha OS=Homo sapiens OX=9606 GN=PIP4K2A PE=1 SV=2	PIP4K2A	5;5	2	62805	371250	1331300	449130	387920	1181000	357260	298170	224880	1632700	0.0199981	0.0783948	-1.10821	TB-EOT	Non significant
P48444	P48444;P48444-2	>SP|P48444|COPD_HUMAN Coatomer subunit delta OS=Homo sapiens OX=9606 GN=ARCN1 PE=1 SV=1;>SP|P48444-2|COPD_HUMAN Isoform 2 of Coatomer subunit delta OS=Homo sapiens OX=9606 GN=ARCN1	ARCN1	8;6	2	38183	42434	252960	117330	135050	257370	49754	93271	242660	448300	0.672245	0.775197	-0.14255	TB-EOT	Non significant
P48506	P48506	>SP|P48506|GSH1_HUMAN Glutamate--cysteine ligase catalytic subunit OS=Homo sapiens OX=9606 GN=GCLC PE=1 SV=2	GCLC	15	1	163060	545330	2095800	626710	465830	2954400	278650	542160	686800	1772500	0.00373158	0.0272872	-1.06491	TB-EOT	Downregulated
P48507	P48507;P48507-2	>SP|P48507|GSH0_HUMAN Glutamate--cysteine ligase regulatory subunit OS=Homo sapiens OX=9606 GN=GCLM PE=1 SV=1;>SP|P48507-2|GSH0_HUMAN Isoform 2 of Glutamate--cysteine ligase regulatory subunit OS=Homo sapiens OX=9606 GN=GCLM	GCLM	2;1	2	7190.9	7376.9	95220	44854	28776	115030	17889	24787	41015	75889	0.60295	0.722264	-0.224506	TB-EOT	Non significant
P48509	P48509	>SP|P48509|CD151_HUMAN CD151 antigen OS=Homo sapiens OX=9606 GN=CD151 PE=1 SV=3	CD151	2	1	42720	68922	98646	130170	83591	199540	45650	82527	101440	200770	0.798804	0.870954	0.0804572	TB-EOT	Non significant
P48556	P48556	>SP|P48556|PSMD8_HUMAN 26S proteasome non-ATPase regulatory subunit 8 OS=Homo sapiens OX=9606 GN=PSMD8 PE=1 SV=2	PSMD8	3	1	11727	63314	203570	47876	64987	183060	26992	53008	66519	212860	0.00400357	0.0288598	-1.08637	TB-EOT	Downregulated
P48594	P48594	>SP|P48594|SPB4_HUMAN Serpin B4 OS=Homo sapiens OX=9606 GN=SERPINB4 PE=1 SV=2	SERPINB4	2	1	67614	50784	470940	193450	419790	97760	127040	201660	214870	273450	0.038762	0.120567	1.00782	TB-EOT	Non significant
P48595	P48595	>SP|P48595|SPB10_HUMAN Serpin B10 OS=Homo sapiens OX=9606 GN=SERPINB10 PE=1 SV=1	SERPINB10	5	1	176180	14321	155580	54028	346170	121970	58473	96607	311060	97534	0.00869785	0.048107	1.75851	TB-EOT	Upregulated
P48637	P48637;P48637-2	>SP|P48637|GSHB_HUMAN Glutathione synthetase OS=Homo sapiens OX=9606 GN=GSS PE=1 SV=1;>SP|P48637-2|GSHB_HUMAN Isoform 2 of Glutathione synthetase OS=Homo sapiens OX=9606 GN=GSS	GSS	18;11	2	2345600	1082400	4448700	2432700	2629800	3204000	1764100	1315400	4691900	5411400	0.188768	0.341399	0.486819	TB-EOT	Non significant
P48643	P48643;P48643-2	>SP|P48643|TCPE_HUMAN T-complex protein 1 subunit epsilon OS=Homo sapiens OX=9606 GN=CCT5 PE=1 SV=1;>SP|P48643-2|TCPE_HUMAN Isoform 2 of T-complex protein 1 subunit epsilon OS=Homo sapiens OX=9606 GN=CCT5	CCT5	13;12	2	112620	239910	1794600	562840	1050200	1398200	298070	539920	1074800	2014600	0.4782	0.619015	-0.285626	TB-EOT	Non significant
P48735-2	P48735-2;P48735	>SP|P48735-2|IDHP_HUMAN Isoform 2 of Isocitrate dehydrogenase [NADP], mitochondrial OS=Homo sapiens OX=9606 GN=IDH2;>SP|P48735|IDHP_HUMAN Isocitrate dehydrogenase [NADP], mitochondrial OS=Homo sapiens OX=9606 GN=IDH2 PE=1 SV=2	IDH2	2;2	2	4057.3	10837	31582	15374	15723	14376	10222	7886	9449.3	46921	0.386316	0.539792	-0.345014	TB-EOT	Non significant
P48739	P48739;P48739-2;P48739-3	>SP|P48739|PIPNB_HUMAN Phosphatidylinositol transfer protein beta isoform OS=Homo sapiens OX=9606 GN=PITPNB PE=1 SV=2;>SP|P48739-2|PIPNB_HUMAN Isoform 2 of Phosphatidylinositol transfer protein beta isoform OS=Homo sapiens OX=9606 GN=PITPNB;>SP|P48739-3|PIPNB	PITPNB	7;7;7	3	63191	252790	1015200	410730	397130	1189100	308890	252620	262580	1859100	0.0259782	0.0948943	-0.973076	TB-EOT	Non significant
P48960-2	P48960-2;P48960-3;P48960;Q9UHX3-4;Q9UHX3-6;Q9UHX3-3;Q9UHX3-2;Q9UHX3	>SP|P48960-2|CD97_HUMAN Isoform 2 of CD97 antigen OS=Homo sapiens OX=9606 GN=CD97;>SP|P48960-3|CD97_HUMAN Isoform 3 of CD97 antigen OS=Homo sapiens OX=9606 GN=CD97;>SP|P48960|CD97_HUMAN CD97 antigen OS=Homo sapiens OX=9606 GN=CD97 PE=1 SV=4	CD97	3;3;3;1;1;1;1;1	8	57852	20968	30896	73202	37022	33251	4948.1	9198.2	47119	30181	0.290586	0.452387	0.75057	TB-EOT	Non significant
P49137-2	P49137-2;P49137;Q16644	>SP|P49137-2|MAPK2_HUMAN Isoform 2 of MAP kinase-activated protein kinase 2 OS=Homo sapiens OX=9606 GN=MAPKAPK2;>SP|P49137|MAPK2_HUMAN MAP kinase-activated protein kinase 2 OS=Homo sapiens OX=9606 GN=MAPKAPK2 PE=1 SV=1;>SP|Q16644|MAPK3_HUMAN MAP kinase-activa	MAPKAPK2;MAPKAPK3	2;2;1	3	37991	40659	108650	66342	93575	125130	46115	52860	120850	175050	0.398577	0.547638	0.227996	TB-EOT	Non significant
P49189	P49189;P49189-2	>SP|P49189|AL9A1_HUMAN 4-trimethylaminobutyraldehyde dehydrogenase OS=Homo sapiens OX=9606 GN=ALDH9A1 PE=1 SV=3;>SP|P49189-2|AL9A1_HUMAN Isoform 2 of 4-trimethylaminobutyraldehyde dehydrogenase OS=Homo sapiens OX=9606 GN=ALDH9A1	ALDH9A1	10;6	2	112930	329460	1422500	737370	894440	1396200	465040	529490	1630600	2532300	0.687425	0.787329	-0.168706	TB-EOT	Non significant
P49207	P49207	>SP|P49207|RL34_HUMAN 60S ribosomal protein L34 OS=Homo sapiens OX=9606 GN=RPL34 PE=1 SV=3	RPL34	3	1	5986.9	81558	111020	41377	29932	295480	4426	38110	28196	350050	0.000387572	0.00775654	-2.41473	TB-EOT	Downregulated
P49321-2	P49321-2;P49321;P49321-3;P9WKE5;P49321-4	>SP|P49321-2|NASP_HUMAN Isoform 2 of Nuclear autoantigenic sperm protein OS=Homo sapiens OX=9606 GN=NASP;>SP|P49321|NASP_HUMAN Nuclear autoantigenic sperm protein OS=Homo sapiens OX=9606 GN=NASP PE=1 SV=2;>SP|P49321-3|NASP_HUMAN Isoform 3 of Nuclear autoantig	NASP	3;3;3;1;1	5	78999	81215	359840	207080	219860	482760	105380	123770	260800	455730	0.869223	0.914091	-0.0421708	TB-EOT	Non significant
P49354-2	P49354-2;P49354	>SP|P49354-2|FNTA_HUMAN Isoform 2 of Protein farnesyltransferase/geranylgeranyltransferase type-1 subunit alpha OS=Homo sapiens OX=9606 GN=FNTA;>SP|P49354|FNTA_HUMAN Protein farnesyltransferase/geranylgeranyltransferase type-1 subunit alpha OS=Homo sapiens O	FNTA	7;7	2	15924	20104	225020	120740	105330	170610	45176	71340	88996	307620	0.746302	0.831594	-0.138799	TB-EOT	Non significant
P49368-2	P49368-2;P49368	>SP|P49368-2|TCPG_HUMAN Isoform 2 of T-complex protein 1 subunit gamma OS=Homo sapiens OX=9606 GN=CCT3;>SP|P49368|TCPG_HUMAN T-complex protein 1 subunit gamma OS=Homo sapiens OX=9606 GN=CCT3 PE=1 SV=4	CCT3	12;12	2	108610	281480	966890	296540	285070	1006700	146990	264590	286520	1246700	0.00201405	0.0195019	-0.964349	TB-EOT	Non significant
P49407-2	P49407-2;P49407;P32121-5;P32121-2;P32121;P32121-3;P32121-4	>SP|P49407-2|ARRB1_HUMAN Isoform 1B of Beta-arrestin-1 OS=Homo sapiens OX=9606 GN=ARRB1;>SP|P49407|ARRB1_HUMAN Beta-arrestin-1 OS=Homo sapiens OX=9606 GN=ARRB1 PE=1 SV=2	ARRB1	7;6;1;1;1;1;1	7	71942	165220	797790	288570	182730	667530	174430	179560	127940	1032700	0.0194712	0.0779362	-0.945195	TB-EOT	Non significant
P49454	P49454;P19320-2;P19320-3;P19320	>SP|P49454|CENPF_HUMAN Centromere protein F OS=Homo sapiens OX=9606 GN=CENPF PE=1 SV=2	CENPF	3;1;1;1	4	27886	3399.1	9011.5	16887	44351	7268.8	13539	55753	56889	7250.8	1.11744e-05	0.00339926	3.14987	TB-EOT	Upregulated
P49588	P49588;P49588-2	>SP|P49588|SYAC_HUMAN Alanine--tRNA ligase, cytoplasmic OS=Homo sapiens OX=9606 GN=AARS PE=1 SV=2;>SP|P49588-2|SYAC_HUMAN Isoform 2 of Alanine--tRNA ligase, cytoplasmic OS=Homo sapiens OX=9606 GN=AARS	AARS	13;12	2	145920	259810	1085200	721500	478630	1110400	273490	475200	408880	2078200	0.217384	0.372344	-0.41176	TB-EOT	Non significant
P49589-2	P49589-2;P49589;P49589-3	>SP|P49589-2|SYCC_HUMAN Isoform 2 of Cysteine--tRNA ligase, cytoplasmic OS=Homo sapiens OX=9606 GN=CARS;>SP|P49589|SYCC_HUMAN Cysteine--tRNA ligase, cytoplasmic OS=Homo sapiens OX=9606 GN=CARS PE=1 SV=3;>SP|P49589-3|SYCC_HUMAN Isoform 3 of Cysteine--tRNA liga	CARS	6;6;6	3	18993	60763	255960	93483	72966	288860	64401	63048	64627	391500	0.0108181	0.0546656	-0.989879	TB-EOT	Non significant
P49591	P49591	>SP|P49591|SYSC_HUMAN Serine--tRNA ligase, cytoplasmic OS=Homo sapiens OX=9606 GN=SARS PE=1 SV=3	SARS	3	1	14085	113930	380700	88458	115090	323580	57223	83552	146070	502760	0.00659455	0.0404448	-1.23116	TB-EOT	Downregulated
P49720	P49720	>SP|P49720|PSB3_HUMAN Proteasome subunit beta type-3 OS=Homo sapiens OX=9606 GN=PSMB3 PE=1 SV=2	PSMB3	6	1	153630	73240	653530	356440	371900	519390	209460	267750	320700	1099000	0.476891	0.617846	0.253342	TB-EOT	Non significant
P49721	P49721	>SP|P49721|PSB2_HUMAN Proteasome subunit beta type-2 OS=Homo sapiens OX=9606 GN=PSMB2 PE=1 SV=1	PSMB2	5	1	228620	197670	1041000	652850	625710	1416500	463790	382200	377530	1754500	0.729006	0.820132	-0.121115	TB-EOT	Non significant
P49773	P49773	>SP|P49773|HINT1_HUMAN Histidine triad nucleotide-binding protein 1 OS=Homo sapiens OX=9606 GN=HINT1 PE=1 SV=2	HINT1	3	1	156570	160130	611250	385380	223400	806460	252180	257060	553940	603760	0.706262	0.800595	0.119701	TB-EOT	Non significant
P49788-2	P49788-2;P49788	>SP|P49788-2|TIG1_HUMAN Isoform 1 of Retinoic acid receptor responder protein 1 OS=Homo sapiens OX=9606 GN=RARRES1;>SP|P49788|TIG1_HUMAN Retinoic acid receptor responder protein 1 OS=Homo sapiens OX=9606 GN=RARRES1 PE=1 SV=2	RARRES1	2;2	2	20038	36868	106870	168900	161520	112710	59800	120260	89031	102820	0.0396266	0.122256	0.887662	TB-EOT	Non significant
P49913	P49913	>SP|P49913|CAMP_HUMAN Cathelicidin antimicrobial peptide OS=Homo sapiens OX=9606 GN=CAMP PE=1 SV=1	CAMP	5	1	2565300	60205	1048100	143230	3618800	159560	503500	212590	5112500	250480	0.0148786	0.066756	2.93871	TB-EOT	Non significant
P50135	P50135;P50135-3;P50135-2	>SP|P50135|HNMT_HUMAN Histamine N-methyltransferase OS=Homo sapiens OX=9606 GN=HNMT PE=1 SV=1	HNMT	6;1;1	3	254950	456160	2482700	1047200	844170	2499700	586860	746870	312500	6424500	0.0453404	0.134455	-1.02514	TB-EOT	Non significant
P50148	P50148;Q03113-3;Q03113-2;P19086;Q03113	>SP|P50148|GNAQ_HUMAN Guanine nucleotide-binding protein G(q) subunit alpha OS=Homo sapiens OX=9606 GN=GNAQ PE=1 SV=4	GNAQ	3;0;0;0;0	5	140600	183850	740030	589830	481670	1140800	495320	388200	424930	778630	0.496972	0.633078	0.242978	TB-EOT	Non significant
P50225	P50225;P50225-2;P50226;P0DMN0;P0DMM9;P0DMM9-3	>SP|P50225|ST1A1_HUMAN Sulfotransferase 1A1 OS=Homo sapiens OX=9606 GN=SULT1A1 PE=1 SV=3;>SP|P50225-2|ST1A1_HUMAN Isoform 2 of Sulfotransferase 1A1 OS=Homo sapiens OX=9606 GN=SULT1A1;>SP|P50226|ST1A2_HUMAN Sulfotransferase 1A2 OS=Homo sapiens OX=9606 GN=SULT1	SULT1A1;SULT1A2;SULT1A4;SULT1A3	4;3;3;2;2;2	6	11570	66261	260210	155270	87086	84562	44872	151660	104710	385860	0.603329	0.722264	-0.293191	TB-EOT	Non significant
P50395	P50395;P50395-2	>SP|P50395|GDIB_HUMAN Rab GDP dissociation inhibitor beta OS=Homo sapiens OX=9606 GN=GDI2 PE=1 SV=2;>SP|P50395-2|GDIB_HUMAN Isoform 2 of Rab GDP dissociation inhibitor beta OS=Homo sapiens OX=9606 GN=GDI2	GDI2	15;14	2	399200	922160	5562000	1858400	3031000	5791700	1791600	1548400	1391300	8992100	0.142853	0.282945	-0.638405	TB-EOT	Non significant
P50452	P50452;P50452-3;P50452-2	>SP|P50452|SPB8_HUMAN Serpin B8 OS=Homo sapiens OX=9606 GN=SERPINB8 PE=1 SV=2;>SP|P50452-3|SPB8_HUMAN Isoform 3 of Serpin B8 OS=Homo sapiens OX=9606 GN=SERPINB8;>SP|P50452-2|SPB8_HUMAN Isoform 2 of Serpin B8 OS=Homo sapiens OX=9606 GN=SERPINB8	SERPINB8	6;4;3	3	66044	79894	326040	254690	274780	280400	142500	253820	222240	509350	0.184752	0.336939	0.422242	TB-EOT	Non significant
P50453	P50453	>SP|P50453|SPB9_HUMAN Serpin B9 OS=Homo sapiens OX=9606 GN=SERPINB9 PE=1 SV=1	SERPINB9	6	1	152730	68978	325030	279960	281370	320180	120340	205170	198160	560580	0.118912	0.252021	0.504579	TB-EOT	Non significant
P50502	P50502;Q8NFI4;Q8IZP2	>SP|P50502|F10A1_HUMAN Hsc70-interacting protein OS=Homo sapiens OX=9606 GN=ST13 PE=1 SV=2;>SP|Q8NFI4|F10A5_HUMAN Putative protein FAM10A5 OS=Homo sapiens OX=9606 GN=ST13P5 PE=5 SV=1;>SP|Q8IZP2|ST134_HUMAN Putative protein FAM10A4 OS=Homo sapiens OX=9606 GN=S	ST13;ST13P5;ST13P4	12;8;7	3	707200	1060400	5081900	1997300	1182700	9063000	1866200	1600900	1248500	8087800	0.0518229	0.145968	-0.859164	TB-EOT	Non significant
P50552	P50552	>SP|P50552|VASP_HUMAN Vasodilator-stimulated phosphoprotein OS=Homo sapiens OX=9606 GN=VASP PE=1 SV=3	VASP	5	1	58630	50198	147580	45150	122580	126390	19059	28672	68503	280570	0.221059	0.376835	-0.551559	TB-EOT	Non significant
P50851-2	P50851-2;P50851	>SP|P50851-2|LRBA_HUMAN Isoform 2 of Lipopolysaccharide-responsive and beige-like anchor protein OS=Homo sapiens OX=9606 GN=LRBA;>SP|P50851|LRBA_HUMAN Lipopolysaccharide-responsive and beige-like anchor protein OS=Homo sapiens OX=9606 GN=LRBA PE=1 SV=4	LRBA	3;3	2	4687.4	9128.2	37314	21600	19587	39286	13091	17687	25174	34310	0.830137	0.891524	0.0656531	TB-EOT	Non significant
P50895	P50895	>SP|P50895|BCAM_HUMAN Basal cell adhesion molecule OS=Homo sapiens OX=9606 GN=BCAM PE=1 SV=2	BCAM	4	1	27128	19020	59150	278960	34104	67187	37273	103310	104430	49982	0.0115068	0.0564577	1.49418	TB-EOT	Non significant
P50897	P50897;P50897-2	>SP|P50897|PPT1_HUMAN Palmitoyl-protein thioesterase 1 OS=Homo sapiens OX=9606 GN=PPT1 PE=1 SV=1;>SP|P50897-2|PPT1_HUMAN Isoform 2 of Palmitoyl-protein thioesterase 1 OS=Homo sapiens OX=9606 GN=PPT1	PPT1	5;4	2	224970	730160	1423000	493470	361130	2328500	40094	207180	197730	7685000	0.000711117	0.0108941	-2.5119	TB-EOT	Downregulated
P50914	P50914	>SP|P50914|RL14_HUMAN 60S ribosomal protein L14 OS=Homo sapiens OX=9606 GN=RPL14 PE=1 SV=4	RPL14	3	1	29121	246070	340630	76489	88886	446200	21756	62373	107510	826240	5.42046e-05	0.00421529	-2.0628	TB-EOT	Downregulated
P50990	P50990;P50990-2;P50990-3	>SP|P50990|TCPQ_HUMAN T-complex protein 1 subunit theta OS=Homo sapiens OX=9606 GN=CCT8 PE=1 SV=4;>SP|P50990-2|TCPQ_HUMAN Isoform 2 of T-complex protein 1 subunit theta OS=Homo sapiens OX=9606 GN=CCT8;>SP|P50990-3|TCPQ_HUMAN Isoform 3 of T-complex protein 1 s	CCT8	22;21;18	3	323710	532930	4222500	1166900	2216300	3700600	757650	1258200	3473800	5687100	0.487188	0.625855	-0.288864	TB-EOT	Non significant
P50991-2	P50991-2;P50991	>SP|P50991-2|TCPD_HUMAN Isoform 2 of T-complex protein 1 subunit delta OS=Homo sapiens OX=9606 GN=CCT4;>SP|P50991|TCPD_HUMAN T-complex protein 1 subunit delta OS=Homo sapiens OX=9606 GN=CCT4 PE=1 SV=4	CCT4	7;7	2	22201	121240	465530	150540	243580	397380	100840	108550	380920	469200	0.245923	0.404816	-0.52816	TB-EOT	Non significant
P50995-2	P50995-2;P50995;P27216;P27216-2	>SP|P50995-2|ANX11_HUMAN Isoform 2 of Annexin A11 OS=Homo sapiens OX=9606 GN=ANXA11;>SP|P50995|ANX11_HUMAN Annexin A11 OS=Homo sapiens OX=9606 GN=ANXA11 PE=1 SV=1	ANXA11	15;15;1;1	4	1377700	628070	4287800	1737200	3139000	6751200	1446000	1705600	1405500	7390300	0.755252	0.836664	-0.126363	TB-EOT	Non significant
P51148	P51148;P51148-2;P61020-2;P20339-2;P61020;P20339	>SP|P51148|RAB5C_HUMAN Ras-related protein Rab-5C OS=Homo sapiens OX=9606 GN=RAB5C PE=1 SV=2;>SP|P51148-2|RAB5C_HUMAN Isoform 2 of Ras-related protein Rab-5C OS=Homo sapiens OX=9606 GN=RAB5C	RAB5C	5;5;1;1;1;1	6	39205	58646	136460	64646	105830	245940	42628	41095	113540	297350	0.125584	0.262122	-0.48465	TB-EOT	Non significant
P51149	P51149	>SP|P51149|RAB7A_HUMAN Ras-related protein Rab-7a OS=Homo sapiens OX=9606 GN=RAB7A PE=1 SV=1	RAB7A	6	1	202650	93825	311160	186550	431920	387670	76858	88234	347290	724360	0.736598	0.825011	0.145559	TB-EOT	Non significant
P51452	P51452;P51452-2	>SP|P51452|DUS3_HUMAN Dual specificity protein phosphatase 3 OS=Homo sapiens OX=9606 GN=DUSP3 PE=1 SV=1;>SP|P51452-2|DUS3_HUMAN Isoform 2 of Dual specificity protein phosphatase 3 OS=Homo sapiens OX=9606 GN=DUSP3	DUSP3	2;1	2	7708.4	12380	38600	25269	18801	49224	12911	16552	13713	74631	0.175664	0.323861	-0.435952	TB-EOT	Non significant
P51580	P51580	>SP|P51580|TPMT_HUMAN Thiopurine S-methyltransferase OS=Homo sapiens OX=9606 GN=TPMT PE=1 SV=1	TPMT	10	1	78372	304230	1163200	317180	429360	1335100	178380	212260	191160	2047800	0.000931387	0.0117078	-1.40743	TB-EOT	Downregulated
P51665	P51665	>SP|P51665|PSMD7_HUMAN 26S proteasome non-ATPase regulatory subunit 7 OS=Homo sapiens OX=9606 GN=PSMD7 PE=1 SV=2	PSMD7	4	1	80433	104540	311480	196480	156970	333910	120400	171650	224660	403930	0.761062	0.841261	0.0807863	TB-EOT	Non significant
P51858	P51858;P51858-2;P51858-3;Q9Y3E1;O75475-3;O75475-2;O75475;Q7Z4V5-4;Q7Z4V5-3	>SP|P51858|HDGF_HUMAN Hepatoma-derived growth factor OS=Homo sapiens OX=9606 GN=HDGF PE=1 SV=1;>SP|P51858-2|HDGF_HUMAN Isoform 2 of Hepatoma-derived growth factor OS=Homo sapiens OX=9606 GN=HDGF;>SP|P51858-3|HDGF_HUMAN Isoform 3 of Hepatoma-derived growth fac	HDGF	14;13;13;0;0;0;0;0;0	9	5917900	1118500	4844900	2441700	2791600	7972400	2101500	1738800	7224900	5616500	0.289458	0.451669	0.552759	TB-EOT	Non significant
P51884	P51884;CON__Q05443	>SP|P51884|LUM_HUMAN Lumican OS=Homo sapiens OX=9606 GN=LUM PE=1 SV=2	LUM	13;3	2	1604500	2167700	9411400	38239000	2781600	3557000	9077400	32015000	6559600	3392200	0.0346933	0.111561	1.92341	TB-EOT	Non significant
P51991-2	P51991-2;P51991	>SP|P51991-2|ROA3_HUMAN Isoform 2 of Heterogeneous nuclear ribonucleoprotein A3 OS=Homo sapiens OX=9606 GN=HNRNPA3;>SP|P51991|ROA3_HUMAN Heterogeneous nuclear ribonucleoprotein A3 OS=Homo sapiens OX=9606 GN=HNRNPA3 PE=1 SV=2	HNRNPA3	2;2	2	13283	18364	58771	17932	26694	57636	24371	21346	122440	85714	0.935582	0.9615	0.0363527	TB-EOT	Non significant
P52209-2	P52209-2;P52209	>SP|P52209-2|6PGD_HUMAN Isoform 2 of 6-phosphogluconate dehydrogenase, decarboxylating OS=Homo sapiens OX=9606 GN=PGD;>SP|P52209|6PGD_HUMAN 6-phosphogluconate dehydrogenase, decarboxylating OS=Homo sapiens OX=9606 GN=PGD PE=1 SV=3	PGD	17;17	2	609780	5238400	26238000	4943800	5643400	30112000	985070	3713100	2863100	38868000	0.000158289	0.00491343	-2.22035	TB-EOT	Downregulated
P52272-2	P52272-2;P52272	>SP|P52272-2|HNRPM_HUMAN Isoform 2 of Heterogeneous nuclear ribonucleoprotein M OS=Homo sapiens OX=9606 GN=HNRNPM;>SP|P52272|HNRPM_HUMAN Heterogeneous nuclear ribonucleoprotein M OS=Homo sapiens OX=9606 GN=HNRNPM PE=1 SV=3	HNRNPM	3;3	2	24838	24398	107740	29704	30591	40959	18923	23364	127660	54831	0.557454	0.68378	0.275155	TB-EOT	Non significant
P52306-6	P52306-6;P52306-2;P52306-3;P52306-4;P52306;P52306-5	>SP|P52306-6|GDS1_HUMAN Isoform 6 of Rap1 GTPase-GDP dissociation stimulator 1 OS=Homo sapiens OX=9606 GN=RAP1GDS1;>SP|P52306-2|GDS1_HUMAN Isoform 2 of Rap1 GTPase-GDP dissociation stimulator 1 OS=Homo sapiens OX=9606 GN=RAP1GDS1;>SP|P52306-3|GDS1_HUMAN Isofo	RAP1GDS1	7;7;7;7;7;7	6	15583	42929	238430	109390	98877	253480	19151	65497	53659	359260	0.020863	0.0811576	-1.02476	TB-EOT	Non significant
P52565	P52565;P52565-2	>SP|P52565|GDIR1_HUMAN Rho GDP-dissociation inhibitor 1 OS=Homo sapiens OX=9606 GN=ARHGDIA PE=1 SV=3;>SP|P52565-2|GDIR1_HUMAN Isoform 2 of Rho GDP-dissociation inhibitor 1 OS=Homo sapiens OX=9606 GN=ARHGDIA	ARHGDIA	8;6	2	2063800	1543500	6529500	3522700	2361200	7555300	1939300	1653300	3947000	8511200	0.555575	0.682025	-0.183803	TB-EOT	Non significant
P52566	P52566	>SP|P52566|GDIR2_HUMAN Rho GDP-dissociation inhibitor 2 OS=Homo sapiens OX=9606 GN=ARHGDIB PE=1 SV=3	ARHGDIB	13	1	7375200	2458500	10082000	3242400	3815800	9966400	1398700	1300600	5605800	11963000	0.480495	0.620929	-0.381268	TB-EOT	Non significant
P52597	P52597	>SP|P52597|HNRPF_HUMAN Heterogeneous nuclear ribonucleoprotein F OS=Homo sapiens OX=9606 GN=HNRNPF PE=1 SV=3	HNRNPF	2	1	18377	11273	76774	35577	27309	61943	26595	22359	77355	100150	0.568936	0.693391	0.203837	TB-EOT	Non significant
P52630-4	P52630-4;P52630	>SP|P52630-4|STAT2_HUMAN Isoform 2 of Signal transducer and activator of transcription 2 OS=Homo sapiens OX=9606 GN=STAT2;>SP|P52630|STAT2_HUMAN Signal transducer and activator of transcription 2 OS=Homo sapiens OX=9606 GN=STAT2 PE=1 SV=1	STAT2	2;2	2	791.69	4501.4	14788	7163.2	6183.5	14580	1822.6	2735.2	4908.4	14043	0.0199947	0.0783948	-0.952105	TB-EOT	Non significant
P52788	P52788;P52788-2	>SP|P52788|SPSY_HUMAN Spermine synthase OS=Homo sapiens OX=9606 GN=SMS PE=1 SV=2;>SP|P52788-2|SPSY_HUMAN Isoform 2 of Spermine synthase OS=Homo sapiens OX=9606 GN=SMS	SMS	7;5	2	95511	240650	1296300	325970	523030	1608800	269310	346050	701280	2070200	0.037403	0.118029	-0.802438	TB-EOT	Non significant
P52789	P52789	>SP|P52789|HXK2_HUMAN Hexokinase-2 OS=Homo sapiens OX=9606 GN=HK2 PE=1 SV=2	HK2	7	1	43386	106030	369080	113130	115730	717250	29550	81811	94131	893400	0.000256864	0.0063594	-1.62714	TB-EOT	Downregulated
P52790	P52790;Q2TB90-3;Q2TB90-2	>SP|P52790|HXK3_HUMAN Hexokinase-3 OS=Homo sapiens OX=9606 GN=HK3 PE=1 SV=2	HK3	23;0;0	3	221750	931650	5850300	1048000	1934400	6437800	236020	715510	537070	13179000	0.000502275	0.00909476	-2.12531	TB-EOT	Downregulated
P52888	P52888	>SP|P52888|THOP1_HUMAN Thimet oligopeptidase OS=Homo sapiens OX=9606 GN=THOP1 PE=1 SV=2	THOP1	2	1	5970.4	11217	51664	52486	25308	112260	26404	25269	13777	90079	0.413949	0.562661	-0.410054	TB-EOT	Non significant
P52895	P52895;P52895-2	>SP|P52895|AK1C2_HUMAN Aldo-keto reductase family 1 member C2 OS=Homo sapiens OX=9606 GN=AKR1C2 PE=1 SV=3	AKR1C2	3;1	2	487040	1933800	7726800	2672400	1056900	13934000	326690	1314900	2185500	5509000	0.00249621	0.02133	-1.62206	TB-EOT	Downregulated
P52907	P52907	>SP|P52907|CAZA1_HUMAN F-actin-capping protein subunit alpha-1 OS=Homo sapiens OX=9606 GN=CAPZA1 PE=1 SV=3	CAPZA1	7	1	247280	515010	1274000	695600	859270	1255900	430290	662480	809490	2242700	0.528915	0.661578	-0.176462	TB-EOT	Non significant
P53004	P53004	>SP|P53004|BIEA_HUMAN Biliverdin reductase A OS=Homo sapiens OX=9606 GN=BLVRA PE=1 SV=2	BLVRA	2	1	16020	42296	68966	46237	65972	59421	25973	48752	73934	90193	0.497713	0.633491	0.231329	TB-EOT	Non significant
P53041	P53041	>SP|P53041|PPP5_HUMAN Serine/threonine-protein phosphatase 5 OS=Homo sapiens OX=9606 GN=PPP5C PE=1 SV=1	PPP5C	6	1	173890	51128	228930	117510	188140	242130	110810	99416	264820	260120	0.0705482	0.181256	0.718069	TB-EOT	Non significant
P53396-2	P53396-2;P53396;P53396-3	>SP|P53396-2|ACLY_HUMAN Isoform 2 of ATP-citrate synthase OS=Homo sapiens OX=9606 GN=ACLY;>SP|P53396|ACLY_HUMAN ATP-citrate synthase OS=Homo sapiens OX=9606 GN=ACLY PE=1 SV=3;>SP|P53396-3|ACLY_HUMAN Isoform 3 of ATP-citrate synthase OS=Homo sapiens OX=9606 GN	ACLY	4;4;2	3	20714	73712	201880	82863	267130	211660	39248	63295	138310	339660	0.290235	0.452303	-0.441851	TB-EOT	Non significant
P53602	P53602	>SP|P53602|MVD1_HUMAN Diphosphomevalonate decarboxylase OS=Homo sapiens OX=9606 GN=MVD PE=1 SV=1	MVD	3	1	24069	64990	163990	82333	102110	180410	70256	70773	130780	209470	0.667392	0.77077	-0.132797	TB-EOT	Non significant
P53609-2	P53609-2;P53609	>SP|P53609-2|PGTB1_HUMAN Isoform 2 of Geranylgeranyl transferase type-1 subunit beta OS=Homo sapiens OX=9606 GN=PGGT1B;>SP|P53609|PGTB1_HUMAN Geranylgeranyl transferase type-1 subunit beta OS=Homo sapiens OX=9606 GN=PGGT1B PE=1 SV=2	PGGT1B	2;2	2	3894.9	17954	80605	46880	21400	96553	28892	30917	22345	152380	0.103934	0.230778	-0.859134	TB-EOT	Non significant
P53611	P53611	>SP|P53611|PGTB2_HUMAN Geranylgeranyl transferase type-2 subunit beta OS=Homo sapiens OX=9606 GN=RABGGTB PE=1 SV=2	RABGGTB	4	1	40430	72733	389130	181770	221800	602430	63098	106980	91842	818290	0.0277489	0.0999487	-0.921221	TB-EOT	Non significant
P53618	P53618	>SP|P53618|COPB_HUMAN Coatomer subunit beta OS=Homo sapiens OX=9606 GN=COPB1 PE=1 SV=3	COPB1	11	1	28384	137070	682750	154370	214710	572180	50194	136910	280900	683270	0.00961505	0.0516767	-1.12799	TB-EOT	Non significant
P53621	P53621;P53621-2	>SP|P53621|COPA_HUMAN Coatomer subunit alpha OS=Homo sapiens OX=9606 GN=COPA PE=1 SV=2;>SP|P53621-2|COPA_HUMAN Isoform 2 of Coatomer subunit alpha OS=Homo sapiens OX=9606 GN=COPA	COPA	15;15	2	94132	257510	600590	290610	350330	925550	158210	203340	412080	1114500	0.0316276	0.107525	-0.637696	TB-EOT	Non significant
P53634	P53634;P53634-2;P53634-3	>SP|P53634|CATC_HUMAN Dipeptidyl peptidase 1 OS=Homo sapiens OX=9606 GN=CTSC PE=1 SV=2	CTSC	16;2;2	3	1071400	619460	4407300	1681500	3283300	4857000	1763500	964940	10162000	7079200	0.513267	0.64733	0.331932	TB-EOT	Non significant
P53990-2	P53990-2;P53990;P53990-4;P53990-5;P53990-3;P53990-6	>SP|P53990-2|IST1_HUMAN Isoform 2 of IST1 homolog OS=Homo sapiens OX=9606 GN=IST1;>SP|P53990|IST1_HUMAN IST1 homolog OS=Homo sapiens OX=9606 GN=IST1 PE=1 SV=1;>SP|P53990-4|IST1_HUMAN Isoform 4 of IST1 homolog OS=Homo sapiens OX=9606 GN=IST1;>SP|P53990-5|IST1_H	IST1	6;6;6;6;5;2	6	131980	170720	488790	447800	294840	984500	91369	190820	174470	967360	0.112008	0.241652	-0.596547	TB-EOT	Non significant
P53992	P53992;P53992-2	>SP|P53992|SC24C_HUMAN Protein transport protein Sec24C OS=Homo sapiens OX=9606 GN=SEC24C PE=1 SV=3	SEC24C	3;1	2	19653	40905	152470	64613	43228	171690	39190	66200	76598	203190	0.111187	0.240906	-0.509432	TB-EOT	Non significant
P53999	P53999	>SP|P53999|TCP4_HUMAN Activated RNA polymerase II transcriptional coactivator p15 OS=Homo sapiens OX=9606 GN=SUB1 PE=1 SV=3	SUB1	2	1	20764	21716	126430	29929	76413	57189	45833	38777	98669	55451	0.17203	0.320659	0.586457	TB-EOT	Non significant
P54108	P54108;P54108-2;P54108-3	>SP|P54108|CRIS3_HUMAN Cysteine-rich secretory protein 3 OS=Homo sapiens OX=9606 GN=CRISP3 PE=1 SV=1;>SP|P54108-2|CRIS3_HUMAN Isoform 2 of Cysteine-rich secretory protein 3 OS=Homo sapiens OX=9606 GN=CRISP3;>SP|P54108-3|CRIS3_HUMAN Isoform 3 of Cysteine-rich	CRISP3	5;5;5	3	642840	56245	290880	251440	406790	111720	107860	93080	893680	110240	0.00595945	0.037756	2.13873	TB-EOT	Upregulated
P54136-2	P54136-2;P54136	>SP|P54136-2|SYRC_HUMAN Isoform Monomeric of Arginine--tRNA ligase, cytoplasmic OS=Homo sapiens OX=9606 GN=RARS;>SP|P54136|SYRC_HUMAN Arginine--tRNA ligase, cytoplasmic OS=Homo sapiens OX=9606 GN=RARS PE=1 SV=2	RARS	5;5	2	24005	50991	181180	58399	144990	141930	29780	58076	86250	176030	0.377363	0.533429	-0.284938	TB-EOT	Non significant
P54577	P54577	>SP|P54577|SYYC_HUMAN Tyrosine--tRNA ligase, cytoplasmic OS=Homo sapiens OX=9606 GN=YARS PE=1 SV=4	YARS	10	1	29658	69551	312800	124910	156620	279400	70150	81785	113560	435450	0.0764046	0.192251	-0.558121	TB-EOT	Non significant
P54578-2	P54578-2;P54578-3;P54578	>SP|P54578-2|UBP14_HUMAN Isoform 2 of Ubiquitin carboxyl-terminal hydrolase 14 OS=Homo sapiens OX=9606 GN=USP14;>SP|P54578-3|UBP14_HUMAN Isoform 3 of Ubiquitin carboxyl-terminal hydrolase 14 OS=Homo sapiens OX=9606 GN=USP14;>SP|P54578|UBP14_HUMAN Ubiquitin ca	USP14	10;10;10	3	61845	116510	572020	292830	290440	489310	238790	232390	253820	786000	0.756698	0.837139	-0.107915	TB-EOT	Non significant
P54727	P54727;P54727-2	>SP|P54727|RD23B_HUMAN UV excision repair protein RAD23 homolog B OS=Homo sapiens OX=9606 GN=RAD23B PE=1 SV=1	RAD23B	5;3	2	373250	86768	479470	386750	344260	601880	77117	199590	627980	709320	0.306991	0.471649	0.473853	TB-EOT	Non significant
P54802	P54802	>SP|P54802|ANAG_HUMAN Alpha-N-acetylglucosaminidase OS=Homo sapiens OX=9606 GN=NAGLU PE=1 SV=2	NAGLU	10	1	198510	150950	394340	496980	326660	663110	137410	193330	790960	1381400	0.694083	0.791072	0.151866	TB-EOT	Non significant
P54920	P54920	>SP|P54920|SNAA_HUMAN Alpha-soluble NSF attachment protein OS=Homo sapiens OX=9606 GN=NAPA PE=1 SV=3	NAPA	10	1	110290	98442	708830	310880	374200	672170	98628	225150	244480	834520	0.386853	0.539792	-0.275436	TB-EOT	Non significant
P54922	P54922;Q8NDY3-2;Q8NDY3	>SP|P54922|ADPRH_HUMAN [Protein ADP-ribosylarginine] hydrolase OS=Homo sapiens OX=9606 GN=ADPRH PE=1 SV=1	ADPRH	3;1;1	3	27575	20320	100380	73881	94914	97041	28549	63274	54934	173110	0.348759	0.509081	0.293041	TB-EOT	Non significant
P55008	P55008;P55008-2;P55008-3	>SP|P55008|AIF1_HUMAN Allograft inflammatory factor 1 OS=Homo sapiens OX=9606 GN=AIF1 PE=1 SV=1;>SP|P55008-2|AIF1_HUMAN Isoform 2 of Allograft inflammatory factor 1 OS=Homo sapiens OX=9606 GN=AIF1	AIF1	3;2;1	3	997590	108570	940110	293360	900820	833430	83208	140600	330870	1683200	0.890933	0.930068	-0.0977309	TB-EOT	Non significant
P55010	P55010	>SP|P55010|IF5_HUMAN Eukaryotic translation initiation factor 5 OS=Homo sapiens OX=9606 GN=EIF5 PE=1 SV=2	EIF5	4	1	25505	51893	229300	88966	68998	329810	65478	85643	80465	390550	0.0360616	0.114748	-0.764364	TB-EOT	Non significant
P55036-2	P55036-2;P55036;A2A3N6	>SP|P55036-2|PSMD4_HUMAN Isoform Rpn10E of 26S proteasome non-ATPase regulatory subunit 4 OS=Homo sapiens OX=9606 GN=PSMD4;>SP|P55036|PSMD4_HUMAN 26S proteasome non-ATPase regulatory subunit 4 OS=Homo sapiens OX=9606 GN=PSMD4 PE=1 SV=1;>SP|A2A3N6|PIPSL_HUMAN	PSMD4;PIPSL	3;3;2	3	31734	36275	78024	63613	47795	162940	31183	38576	31705	159330	0.293	0.455678	-0.3792	TB-EOT	Non significant
P55058-3	P55058-3;P55058-4;P55058-2;P55058	>SP|P55058-3|PLTP_HUMAN Isoform 3 of Phospholipid transfer protein OS=Homo sapiens OX=9606 GN=PLTP;>SP|P55058-4|PLTP_HUMAN Isoform 4 of Phospholipid transfer protein OS=Homo sapiens OX=9606 GN=PLTP;>SP|P55058-2|PLTP_HUMAN Isoform 2 of Phospholipid transfer pr	PLTP	6;6;6;6	4	83623	28728	135050	233300	321100	83513	84411	179160	968240	88087	0.000108065	0.00456573	2.39612	TB-EOT	Upregulated
P55060-4	P55060-4;P55060-3;P55060	>SP|P55060-4|XPO2_HUMAN Isoform 4 of Exportin-2 OS=Homo sapiens OX=9606 GN=CSE1L;>SP|P55060-3|XPO2_HUMAN Isoform 3 of Exportin-2 OS=Homo sapiens OX=9606 GN=CSE1L;>SP|P55060|XPO2_HUMAN Exportin-2 OS=Homo sapiens OX=9606 GN=CSE1L PE=1 SV=3	CSE1L	5;5;5	3	3045.5	16658	107660	47923	41729	59595	13363	27276	21506	68939	0.248755	0.408593	-0.594416	TB-EOT	Non significant
P55064	P55064	>SP|P55064|AQP5_HUMAN Aquaporin-5 OS=Homo sapiens OX=9606 GN=AQP5 PE=1 SV=1	AQP5	3	1	86029	73109	347330	167630	191430	501120	103800	101480	345850	448500	0.878864	0.921262	-0.0463033	TB-EOT	Non significant
P55072	P55072	>SP|P55072|TERA_HUMAN Transitional endoplasmic reticulum ATPase OS=Homo sapiens OX=9606 GN=VCP PE=1 SV=4	VCP	35	1	829400	3023300	12596000	4993100	3917400	12603000	3794100	4200900	3565900	14891000	0.0812636	0.197194	-0.701975	TB-EOT	Non significant
P55160-2	P55160-2;P55160	>SP|P55160-2|NCKPL_HUMAN Isoform 2 of Nck-associated protein 1-like OS=Homo sapiens OX=9606 GN=NCKAP1L;>SP|P55160|NCKPL_HUMAN Nck-associated protein 1-like OS=Homo sapiens OX=9606 GN=NCKAP1L PE=1 SV=3	NCKAP1L	4;4	2	16498	87352	231800	64618	88054	215010	29305	46129	33621	236170	0.00235243	0.0211387	-1.29529	TB-EOT	Downregulated
P55209-3	P55209-3;P55209-2;P55209	>SP|P55209-3|NP1L1_HUMAN Isoform 3 of Nucleosome assembly protein 1-like 1 OS=Homo sapiens OX=9606 GN=NAP1L1;>SP|P55209-2|NP1L1_HUMAN Isoform 2 of Nucleosome assembly protein 1-like 1 OS=Homo sapiens OX=9606 GN=NAP1L1;>SP|P55209|NP1L1_HUMAN Nucleosome assembl	NAP1L1	3;3;3	3	30049	59607	829110	329870	301880	947580	103500	207460	331200	1076700	0.230789	0.387024	-0.651893	TB-EOT	Non significant
P55210	P55210;P55210-3;P55210-2;P55210-4	>SP|P55210|CASP7_HUMAN Caspase-7 OS=Homo sapiens OX=9606 GN=CASP7 PE=1 SV=1;>SP|P55210-3|CASP7_HUMAN Isoform Alpha of Caspase-7 OS=Homo sapiens OX=9606 GN=CASP7;>SP|P55210-2|CASP7_HUMAN Isoform Beta of Caspase-7 OS=Homo sapiens OX=9606 GN=CASP7;>SP|P55210-4|C	CASP7	2;2;1;1	4	5653.9	21922	65365	37336	28795	75040	33543	22718	39024	80622	0.404808	0.553699	-0.332934	TB-EOT	Non significant
P55263-3	P55263-3;P55263-2;P55263;P55263-4	>SP|P55263-3|ADK_HUMAN Isoform 3 of Adenosine kinase OS=Homo sapiens OX=9606 GN=ADK;>SP|P55263-2|ADK_HUMAN Isoform 2 of Adenosine kinase OS=Homo sapiens OX=9606 GN=ADK;>SP|P55263|ADK_HUMAN Adenosine kinase OS=Homo sapiens OX=9606 GN=ADK PE=1 SV=2;>SP|P55263-4|	ADK	5;5;5;4	4	142270	68872	703710	319760	256060	604360	184950	223020	505480	799590	0.552407	0.67995	0.210114	TB-EOT	Non significant
P55327-2	P55327-2;P55327-4;P55327;P55327-7;P55327-5;P55327-6;P55327-3;P55327-8	>SP|P55327-2|TPD52_HUMAN Isoform 2 of Tumor protein D52 OS=Homo sapiens OX=9606 GN=TPD52;>SP|P55327-4|TPD52_HUMAN Isoform 4 of Tumor protein D52 OS=Homo sapiens OX=9606 GN=TPD52;>SP|P55327|TPD52_HUMAN Tumor protein D52 OS=Homo sapiens OX=9606 GN=TPD52 PE=1 SV	TPD52	4;4;4;4;4;4;4;2	8	31137	7622.3	50458	58801	38927	44392	20874	30609	177970	44351	0.00381191	0.0277412	1.46076	TB-EOT	Upregulated
P55735-2	P55735-2;P55735;P55735-4;P55735-3	>SP|P55735-2|SEC13_HUMAN Isoform 2 of Protein SEC13 homolog OS=Homo sapiens OX=9606 GN=SEC13;>SP|P55735|SEC13_HUMAN Protein SEC13 homolog OS=Homo sapiens OX=9606 GN=SEC13 PE=1 SV=3;>SP|P55735-4|SEC13_HUMAN Isoform 4 of Protein SEC13 homolog OS=Homo sapiens OX	SEC13	6;6;6;6	4	181290	147220	699970	216490	198340	572180	177460	179450	493570	783950	0.552543	0.67995	-0.19996	TB-EOT	Non significant
P55786	P55786;P55786-2;A6NEC2;A6NEC2-2;A6NEC2-3	>SP|P55786|PSA_HUMAN Puromycin-sensitive aminopeptidase OS=Homo sapiens OX=9606 GN=NPEPPS PE=1 SV=2;>SP|P55786-2|PSA_HUMAN Isoform 2 of Puromycin-sensitive aminopeptidase OS=Homo sapiens OX=9606 GN=NPEPPS	NPEPPS	30;27;11;6;2	5	301990	769180	6299800	3436400	2093000	7931400	1421100	2228900	1451000	8458900	0.181503	0.33221	-0.675602	TB-EOT	Non significant
P55884	P55884;P55884-2	>SP|P55884|EIF3B_HUMAN Eukaryotic translation initiation factor 3 subunit B OS=Homo sapiens OX=9606 GN=EIF3B PE=1 SV=3;>SP|P55884-2|EIF3B_HUMAN Isoform 2 of Eukaryotic translation initiation factor 3 subunit B OS=Homo sapiens OX=9606 GN=EIF3B	EIF3B	10;10	2	200870	217620	567670	246010	284180	907580	171480	199510	234330	921120	0.123068	0.259099	-0.509919	TB-EOT	Non significant
P56192-2	P56192-2;P56192	>SP|P56192-2|SYMC_HUMAN Isoform 2 of Methionine--tRNA ligase, cytoplasmic OS=Homo sapiens OX=9606 GN=MARS;>SP|P56192|SYMC_HUMAN Methionine--tRNA ligase, cytoplasmic OS=Homo sapiens OX=9606 GN=MARS PE=1 SV=2	MARS	2;2	2	3389	5173.7	12695	3722.6	6668.6	17239	2342.2	3659.1	11322	18272	0.109142	0.238211	-0.560964	TB-EOT	Non significant
P56537	P56537;P56537-2	>SP|P56537|IF6_HUMAN Eukaryotic translation initiation factor 6 OS=Homo sapiens OX=9606 GN=EIF6 PE=1 SV=1;>SP|P56537-2|IF6_HUMAN Isoform 2 of Eukaryotic translation initiation factor 6 OS=Homo sapiens OX=9606 GN=EIF6	EIF6	2;1	2	21389	23261	63189	77789	59724	89955	30632	36476	66903	107050	0.156755	0.303627	0.38373	TB-EOT	Non significant
P56856-2	P56856-2;P56856	>SP|P56856-2|CLD18_HUMAN Isoform A2 of Claudin-18 OS=Homo sapiens OX=9606 GN=CLDN18;>SP|P56856|CLD18_HUMAN Claudin-18 OS=Homo sapiens OX=9606 GN=CLDN18 PE=1 SV=1	CLDN18	2;2	2	7866.9	19785	23275	63762	21542	71417	10981	27171	44352	55236	0.691667	0.789809	0.174379	TB-EOT	Non significant
P57737-2	P57737-2;P57737-4;P57737;P57737-3	>SP|P57737-2|CORO7_HUMAN Isoform 2 of Coronin-7 OS=Homo sapiens OX=9606 GN=CORO7;>SP|P57737-4|CORO7_HUMAN Isoform 4 of Coronin-7 OS=Homo sapiens OX=9606 GN=CORO7;>SP|P57737|CORO7_HUMAN Coronin-7 OS=Homo sapiens OX=9606 GN=CORO7 PE=1 SV=2;>SP|P57737-3|CORO7_HUM	CORO7	3;3;3;3	4	10423	39530	196550	50168	80539	170590	28956	53879	42693	182990	0.0277964	0.0999487	-0.875167	TB-EOT	Non significant
P58546	P58546	>SP|P58546|MTPN_HUMAN Myotrophin OS=Homo sapiens OX=9606 GN=MTPN PE=1 SV=2	MTPN	3	1	179090	26311	188910	96375	119720	188610	67360	66133	135810	326860	0.295625	0.459291	0.507147	TB-EOT	Non significant
P59666	P59666;P59665	>SP|P59666|DEF3_HUMAN Neutrophil defensin 3 OS=Homo sapiens OX=9606 GN=DEFA3 PE=1 SV=1;>SP|P59665|DEF1_HUMAN Neutrophil defensin 1 OS=Homo sapiens OX=9606 GN=DEFA1 PE=1 SV=1	DEFA3;DEFA1	3;3	2	791110	61181	766370	211570	2774500	142390	318220	949370	876140	156860	0.00171285	0.017603	2.8281	TB-EOT	Upregulated
P59998	P59998;P59998-3;P59998-2;P59998-4	>SP|P59998|ARPC4_HUMAN Actin-related protein 2/3 complex subunit 4 OS=Homo sapiens OX=9606 GN=ARPC4 PE=1 SV=3;>SP|P59998-3|ARPC4_HUMAN Isoform 3 of Actin-related protein 2/3 complex subunit 4 OS=Homo sapiens OX=9606 GN=ARPC4;>SP|P59998-2|ARPC4_HUMAN Isoform 2	ARPC4	6;6;5;2	4	151730	569990	2706100	429490	734060	2239400	266920	473730	643510	3766400	0.000361547	0.00750254	-1.40222	TB-EOT	Downregulated
P60033	P60033	>SP|P60033|CD81_HUMAN CD81 antigen OS=Homo sapiens OX=9606 GN=CD81 PE=1 SV=1	CD81	3	1	26130	52652	97876	92060	60422	249140	3558.5	27340	59352	293330	0.0495135	0.142416	-1.32401	TB-EOT	Non significant
P60174-1	P60174-1;P60174;P60174-4	>SP|P60174-1|TPIS_HUMAN Isoform 2 of Triosephosphate isomerase OS=Homo sapiens OX=9606 GN=TPI1;>SP|P60174|TPIS_HUMAN Triosephosphate isomerase OS=Homo sapiens OX=9606 GN=TPI1 PE=1 SV=3;>SP|P60174-4|TPIS_HUMAN Isoform 4 of Triosephosphate isomerase OS=Homo sap	TPI1	16;16;10	3	3936700	2805500	17222000	10598000	8853600	15726000	6763700	5899800	10374000	22727000	0.481377	0.621339	0.208774	TB-EOT	Non significant
P60228	P60228	>SP|P60228|EIF3E_HUMAN Eukaryotic translation initiation factor 3 subunit E OS=Homo sapiens OX=9606 GN=EIF3E PE=1 SV=1	EIF3E	5	1	10217	46335	153980	46745	80959	177780	22127	33685	52842	294300	0.00323981	0.0246926	-1.17756	TB-EOT	Downregulated
P60660-2	P60660-2;P60660;P14649	>SP|P60660-2|MYL6_HUMAN Isoform Smooth muscle of Myosin light polypeptide 6 OS=Homo sapiens OX=9606 GN=MYL6;>SP|P60660|MYL6_HUMAN Myosin light polypeptide 6 OS=Homo sapiens OX=9606 GN=MYL6 PE=1 SV=2	MYL6	7;7;2	3	1272300	143990	1342300	685230	1511900	1220000	187250	304240	1517800	1509300	0.238636	0.396707	0.707763	TB-EOT	Non significant
P60842	P60842;P60842-2;P38919	>SP|P60842|IF4A1_HUMAN Eukaryotic initiation factor 4A-I OS=Homo sapiens OX=9606 GN=EIF4A1 PE=1 SV=1;>SP|P60842-2|IF4A1_HUMAN Isoform 2 of Eukaryotic initiation factor 4A-I OS=Homo sapiens OX=9606 GN=EIF4A1	EIF4A1	5;4;0	3	177810	511790	4433300	1602700	1801200	3669600	611070	1120800	1197100	5830900	0.10596	0.234252	-0.751098	TB-EOT	Non significant
P60891-2	P60891-2;P60891;P11908;P11908-2	>SP|P60891-2|PRPS1_HUMAN Isoform 2 of Ribose-phosphate pyrophosphokinase 1 OS=Homo sapiens OX=9606 GN=PRPS1;>SP|P60891|PRPS1_HUMAN Ribose-phosphate pyrophosphokinase 1 OS=Homo sapiens OX=9606 GN=PRPS1 PE=1 SV=2;>SP|P11908|PRPS2_HUMAN Ribose-phosphate pyrophos	PRPS1;PRPS2	2;2;1;1	4	3033.1	9114.2	49901	27639	34155	34418	28635	25792	48065	38567	0.340602	0.500536	0.489626	TB-EOT	Non significant
P60900	P60900;P60900-2;P60900-3	>SP|P60900|PSA6_HUMAN Proteasome subunit alpha type-6 OS=Homo sapiens OX=9606 GN=PSMA6 PE=1 SV=1;>SP|P60900-2|PSA6_HUMAN Isoform 2 of Proteasome subunit alpha type-6 OS=Homo sapiens OX=9606 GN=PSMA6;>SP|P60900-3|PSA6_HUMAN Isoform 3 of Proteasome subunit alph	PSMA6	11;10;6	3	313970	643050	3155100	1376600	1179700	2820900	1251500	795340	1008000	4660700	0.195814	0.347937	-0.488164	TB-EOT	Non significant
P60953	P60953;P60953-1	>SP|P60953|CDC42_HUMAN Cell division control protein 42 homolog OS=Homo sapiens OX=9606 GN=CDC42 PE=1 SV=2;>SP|P60953-1|CDC42_HUMAN Isoform 1 of Cell division control protein 42 homolog OS=Homo sapiens OX=9606 GN=CDC42	CDC42	6;5	2	397070	1735300	7343100	1945900	2424200	5384500	939210	1239100	3096200	9692100	0.00742911	0.043354	-1.02783	TB-EOT	Downregulated
P60981	P60981;P60981-2	>SP|P60981|DEST_HUMAN Destrin OS=Homo sapiens OX=9606 GN=DSTN PE=1 SV=3;>SP|P60981-2|DEST_HUMAN Isoform 2 of Destrin OS=Homo sapiens OX=9606 GN=DSTN	DSTN	8;7	2	155020	675080	1937400	1212500	544210	2540400	712510	653270	861900	2087500	0.142868	0.282945	-0.608996	TB-EOT	Non significant
P60983	P60983	>SP|P60983|GMFB_HUMAN Glia maturation factor beta OS=Homo sapiens OX=9606 GN=GMFB PE=1 SV=2	GMFB	2	1	29657	18441	161670	132780	54477	211810	49111	59717	54704	209190	0.896738	0.933565	-0.0531848	TB-EOT	Non significant
P61077	P61077;P61077-2;P61077-3;P62837-2;P62837	>SP|P61077|UB2D3_HUMAN Ubiquitin-conjugating enzyme E2 D3 OS=Homo sapiens OX=9606 GN=UBE2D3 PE=1 SV=1;>SP|P61077-2|UB2D3_HUMAN Isoform 2 of Ubiquitin-conjugating enzyme E2 D3 OS=Homo sapiens OX=9606 GN=UBE2D3;>SP|P61077-3|UB2D3_HUMAN Isoform 3 of Ubiquitin-co	UBE2D3;UBE2D2	2;2;2;1;1	5	71056	182990	557980	347580	257230	1033300	257610	225920	231070	875450	0.150948	0.29663	-0.535991	TB-EOT	Non significant
P61081	P61081	>SP|P61081|UBC12_HUMAN NEDD8-conjugating enzyme Ubc12 OS=Homo sapiens OX=9606 GN=UBE2M PE=1 SV=1	UBE2M	4	1	58987	58606	213120	162840	142440	321900	88005	109770	174410	327140	0.617386	0.733628	0.128837	TB-EOT	Non significant
P61086	P61086;P61086-3;P61086-2	>SP|P61086|UBE2K_HUMAN Ubiquitin-conjugating enzyme E2 K OS=Homo sapiens OX=9606 GN=UBE2K PE=1 SV=3;>SP|P61086-3|UBE2K_HUMAN Isoform 3 of Ubiquitin-conjugating enzyme E2 K OS=Homo sapiens OX=9606 GN=UBE2K	UBE2K	3;2;1	3	39712	26485	125660	144840	88779	142460	61166	59282	88218	157930	0.0889085	0.206143	0.526028	TB-EOT	Non significant
P61088	P61088;Q5JXB2	>SP|P61088|UBE2N_HUMAN Ubiquitin-conjugating enzyme E2 N OS=Homo sapiens OX=9606 GN=UBE2N PE=1 SV=1;>SP|Q5JXB2|UE2NL_HUMAN Putative ubiquitin-conjugating enzyme E2 N-like OS=Homo sapiens OX=9606 GN=UBE2NL PE=1 SV=1	UBE2N;UBE2NL	3;2	2	41215	63631	183390	189080	223720	235180	82509	90220	210280	217050	0.139007	0.277103	0.455117	TB-EOT	Non significant
P61106	P61106	>SP|P61106|RAB14_HUMAN Ras-related protein Rab-14 OS=Homo sapiens OX=9606 GN=RAB14 PE=1 SV=4	RAB14	4	1	119520	196470	519150	232590	240430	530750	169240	156000	430930	901970	0.262181	0.42423	-0.334092	TB-EOT	Non significant
P61158	P61158;Q9P1U1-2;Q9P1U1;Q9C0K3;Q9P1U1-3	>SP|P61158|ARP3_HUMAN Actin-related protein 3 OS=Homo sapiens OX=9606 GN=ACTR3 PE=1 SV=3	ACTR3	19;3;3;2;2	5	448280	2083300	7931300	1965200	3928700	6555400	816530	1679800	1737300	11324000	0.00447808	0.0310969	-1.20044	TB-EOT	Downregulated
P61160	P61160;P61160-2	>SP|P61160|ARP2_HUMAN Actin-related protein 2 OS=Homo sapiens OX=9606 GN=ACTR2 PE=1 SV=1;>SP|P61160-2|ARP2_HUMAN Isoform 2 of Actin-related protein 2 OS=Homo sapiens OX=9606 GN=ACTR2	ACTR2	11;10	2	122340	892620	6236300	930750	2305300	5619900	423740	969140	758390	9238100	0.00324688	0.0246926	-1.78849	TB-EOT	Downregulated
P61163	P61163;P42025	>SP|P61163|ACTZ_HUMAN Alpha-centractin OS=Homo sapiens OX=9606 GN=ACTR1A PE=1 SV=1;>SP|P42025|ACTY_HUMAN Beta-centractin OS=Homo sapiens OX=9606 GN=ACTR1B PE=1 SV=1	ACTR1A;ACTR1B	3;2	2	12499	51660	222530	65586	177280	199950	35986	68617	116770	291500	0.174785	0.323562	-0.591519	TB-EOT	Non significant
P61201	P61201;P61201-2	>SP|P61201|CSN2_HUMAN COP9 signalosome complex subunit 2 OS=Homo sapiens OX=9606 GN=COPS2 PE=1 SV=1;>SP|P61201-2|CSN2_HUMAN Isoform 2 of COP9 signalosome complex subunit 2 OS=Homo sapiens OX=9606 GN=COPS2	COPS2	4;4	2	16381	33832	265040	137480	99469	327060	47956	88908	69508	371660	0.137858	0.276261	-0.656363	TB-EOT	Non significant
P61224-3	P61224-3;P61224;A6NIZ1;P61224-4;P61224-2	>SP|P61224-3|RAP1B_HUMAN Isoform 3 of Ras-related protein Rap-1b OS=Homo sapiens OX=9606 GN=RAP1B;>SP|P61224|RAP1B_HUMAN Ras-related protein Rap-1b OS=Homo sapiens OX=9606 GN=RAP1B PE=1 SV=1;>SP|A6NIZ1|RP1BL_HUMAN Ras-related protein Rap-1b-like protein OS=Ho	RAP1B	3;3;3;3;1	5	217960	297820	721370	341710	552580	747530	439470	265560	615460	1419800	0.976855	0.986026	-0.00980443	TB-EOT	Non significant
P61247	P61247	>SP|P61247|RS3A_HUMAN 40S ribosomal protein S3a OS=Homo sapiens OX=9606 GN=RPS3A PE=1 SV=2	RPS3A	6	1	43993	766390	918840	222040	231180	1708900	31721	204100	260650	3143800	0.000106581	0.00456573	-2.6228	TB-EOT	Downregulated
P61313	P61313;P61313-2	>SP|P61313|RL15_HUMAN 60S ribosomal protein L15 OS=Homo sapiens OX=9606 GN=RPL15 PE=1 SV=2;>SP|P61313-2|RL15_HUMAN Isoform 2 of 60S ribosomal protein L15 OS=Homo sapiens OX=9606 GN=RPL15	RPL15	2;1	2	11726	85828	163560	41159	39260	180730	24878	38073	48160	318580	0.000186646	0.00541927	-1.59238	TB-EOT	Downregulated
P61353	P61353	>SP|P61353|RL27_HUMAN 60S ribosomal protein L27 OS=Homo sapiens OX=9606 GN=RPL27 PE=1 SV=2	RPL27	3	1	19546	142140	99601	115730	35810	614230	52180	78804	32731	1145000	0.0109647	0.0550408	-1.88859	TB-EOT	Non significant
P61421	P61421	>SP|P61421|VA0D1_HUMAN V-type proton ATPase subunit d 1 OS=Homo sapiens OX=9606 GN=ATP6V0D1 PE=1 SV=1	ATP6V0D1	3	1	17620	23328	79608	44877	67645	97668	35399	40476	35611	164740	0.694853	0.791072	-0.12652	TB-EOT	Non significant
P61457	P61457	>SP|P61457|PHS_HUMAN Pterin-4-alpha-carbinolamine dehydratase OS=Homo sapiens OX=9606 GN=PCBD1 PE=1 SV=2	PCBD1	2	1	54911	67883	220720	136650	84435	768060	170720	111740	130280	452020	0.32661	0.48751	-0.45873	TB-EOT	Non significant
P61604	P61604	>SP|P61604|CH10_HUMAN 10 kDa heat shock protein, mitochondrial OS=Homo sapiens OX=9606 GN=HSPE1 PE=1 SV=2	HSPE1	3	1	97819	40540	80372	55787	51764	97912	44738	28815	38960	197910	0.999984	0.999984	-1.02013e-05	TB-EOT	Non significant
P61626	P61626	>SP|P61626|LYSC_HUMAN Lysozyme C OS=Homo sapiens OX=9606 GN=LYZ PE=1 SV=1	LYZ	9	1	2930800	458340	6819000	492790	4429500	2018500	473800	804190	19346000	2457700	0.39151	0.541525	0.795253	TB-EOT	Non significant
P61758	P61758	>SP|P61758|PFD3_HUMAN Prefoldin subunit 3 OS=Homo sapiens OX=9606 GN=VBP1 PE=1 SV=3	VBP1	2	1	17863	27294	142170	61704	53686	138010	38805	37834	84093	152470	0.380675	0.5359	-0.252342	TB-EOT	Non significant
P61769	P61769	>SP|P61769|B2MG_HUMAN Beta-2-microglobulin OS=Homo sapiens OX=9606 GN=B2M PE=1 SV=1	B2M	3	1	1407900	350860	1793100	2316600	1205000	1690600	433930	465850	5279200	890560	0.0467845	0.137373	1.22164	TB-EOT	Non significant
P61916	P61916;P61916-2	>SP|P61916|NPC2_HUMAN NPC intracellular cholesterol transporter 2 OS=Homo sapiens OX=9606 GN=NPC2 PE=1 SV=1;>SP|P61916-2|NPC2_HUMAN Isoform 2 of NPC intracellular cholesterol transporter 2 OS=Homo sapiens OX=9606 GN=NPC2	NPC2	7;5	2	3611300	6404300	6678300	11052000	2985200	15437000	268280	1336000	3835500	18627000	0.0954178	0.21923	-1.31324	TB-EOT	Non significant
P61923-5	P61923-5;P61923;P61923-4	>SP|P61923-5|COPZ1_HUMAN Isoform 5 of Coatomer subunit zeta-1 OS=Homo sapiens OX=9606 GN=COPZ1;>SP|P61923|COPZ1_HUMAN Coatomer subunit zeta-1 OS=Homo sapiens OX=9606 GN=COPZ1 PE=1 SV=1;>SP|P61923-4|COPZ1_HUMAN Isoform 4 of Coatomer subunit zeta-1 OS=Homo sapi	COPZ1	2;2;2	3	60602	87034	573420	167450	236860	602640	66025	118800	436680	724400	0.124793	0.261087	-0.577586	TB-EOT	Non significant
P61970	P61970	>SP|P61970|NTF2_HUMAN Nuclear transport factor 2 OS=Homo sapiens OX=9606 GN=NUTF2 PE=1 SV=1	NUTF2	4	1	80084	70456	322970	343810	199750	460540	216400	175100	265120	420930	0.18067	0.331163	0.456224	TB-EOT	Non significant
P61978-3	P61978-3;P61978;P61978-2	>SP|P61978-3|HNRPK_HUMAN Isoform 3 of Heterogeneous nuclear ribonucleoprotein K OS=Homo sapiens OX=9606 GN=HNRNPK;>SP|P61978|HNRPK_HUMAN Heterogeneous nuclear ribonucleoprotein K OS=Homo sapiens OX=9606 GN=HNRNPK PE=1 SV=1;>SP|P61978-2|HNRPK_HUMAN Isoform 2 o	HNRNPK	11;11;11	3	308590	253930	880900	392730	398340	784180	243030	341400	1135100	1252800	0.751897	0.83477	0.107022	TB-EOT	Non significant
P61981	P61981	>SP|P61981|1433G_HUMAN 14-3-3 protein gamma OS=Homo sapiens OX=9606 GN=YWHAG PE=1 SV=2	YWHAG	8	1	858430	1907400	8543500	3602000	2791300	7956500	1372500	1721900	1946300	11703000	0.00797426	0.0453994	-0.899323	TB-EOT	Non significant
P62081	P62081	>SP|P62081|RS7_HUMAN 40S ribosomal protein S7 OS=Homo sapiens OX=9606 GN=RPS7 PE=1 SV=1	RPS7	2	1	5100.8	13219	29032	11188	13298	36543	5309.4	10939	18440	68867	0.0116128	0.0567946	-0.84092	TB-EOT	Non significant
P62136	P62136;P62136-2;P62136-3	>SP|P62136|PP1A_HUMAN Serine/threonine-protein phosphatase PP1-alpha catalytic subunit OS=Homo sapiens OX=9606 GN=PPP1CA PE=1 SV=1;>SP|P62136-2|PP1A_HUMAN Isoform 2 of Serine/threonine-protein phosphatase PP1-alpha catalytic subunit OS=Homo sapiens OX=9606 G	PPP1CA	3;2;1	3	491030	491090	2219500	933860	824750	2406800	652620	582370	608970	3685700	0.115068	0.246852	-0.546665	TB-EOT	Non significant
P62140	P62140	>SP|P62140|PP1B_HUMAN Serine/threonine-protein phosphatase PP1-beta catalytic subunit OS=Homo sapiens OX=9606 GN=PPP1CB PE=1 SV=3	PPP1CB	3	1	72128	134960	554560	240870	238000	566430	248640	168710	260540	845460	0.302747	0.466684	-0.347705	TB-EOT	Non significant
P62195	P62195;P62195-2;P9WQN3;Q8NB90-3;Q8NB90-2;Q8NB90	>SP|P62195|PRS8_HUMAN 26S proteasome regulatory subunit 8 OS=Homo sapiens OX=9606 GN=PSMC5 PE=1 SV=1;>SP|P62195-2|PRS8_HUMAN Isoform 2 of 26S proteasome regulatory subunit 8 OS=Homo sapiens OX=9606 GN=PSMC5	PSMC5	5;4;1;1;1;1	6	25829	85693	350490	116200	134120	227050	28144	69823	113670	294070	0.0256115	0.0944141	-0.803315	TB-EOT	Non significant
P62241	P62241	>SP|P62241|RS8_HUMAN 40S ribosomal protein S8 OS=Homo sapiens OX=9606 GN=RPS8 PE=1 SV=2	RPS8	6	1	23777	198020	303940	121530	102570	691270	48485	86041	68903	1076200	0.000184605	0.00541927	-1.93648	TB-EOT	Downregulated
P62249	P62249	>SP|P62249|RS16_HUMAN 40S ribosomal protein S16 OS=Homo sapiens OX=9606 GN=RPS16 PE=1 SV=2	RPS16	4	1	32040	179610	260360	109160	82109	279450	39951	68791	145290	590830	0.00277663	0.0223452	-1.23108	TB-EOT	Downregulated
P62258	P62258;P62258-2	>SP|P62258|1433E_HUMAN 14-3-3 protein epsilon OS=Homo sapiens OX=9606 GN=YWHAE PE=1 SV=1;>SP|P62258-2|1433E_HUMAN Isoform SV of 14-3-3 protein epsilon OS=Homo sapiens OX=9606 GN=YWHAE	YWHAE	15;12	2	4953400	1674300	11891000	8876600	9218400	14851000	3902300	4793800	15962000	15668000	0.0832442	0.199423	0.627116	TB-EOT	Non significant
P62263	P62263	>SP|P62263|RS14_HUMAN 40S ribosomal protein S14 OS=Homo sapiens OX=9606 GN=RPS14 PE=1 SV=3	RPS14	2	1	14882	35087	112610	39857	52721	120150	32435	30282	37894	149930	0.0378549	0.118716	-0.644489	TB-EOT	Non significant
P62266	P62266	>SP|P62266|RS23_HUMAN 40S ribosomal protein S23 OS=Homo sapiens OX=9606 GN=RPS23 PE=1 SV=3	RPS23	3	1	23542	203740	336980	153610	76019	383590	63016	85275	82745	636310	0.00147403	0.0162463	-1.4952	TB-EOT	Downregulated
P62269	P62269	>SP|P62269|RS18_HUMAN 40S ribosomal protein S18 OS=Homo sapiens OX=9606 GN=RPS18 PE=1 SV=3	RPS18	5	1	20726	66536	103950	43395	32916	169350	10214	16802	40486	375120	0.000588172	0.00972401	-1.71772	TB-EOT	Downregulated
P62277	P62277	>SP|P62277|RS13_HUMAN 40S ribosomal protein S13 OS=Homo sapiens OX=9606 GN=RPS13 PE=1 SV=2	RPS13	3	1	24727	157210	139090	57828	51628	311520	27293	47859	49454	697610	0.000564128	0.00954123	-1.82063	TB-EOT	Downregulated
P62280	P62280	>SP|P62280|RS11_HUMAN 40S ribosomal protein S11 OS=Homo sapiens OX=9606 GN=RPS11 PE=1 SV=3	RPS11	7	1	117040	747530	714270	382980	201110	1783300	84379	217010	278610	2816600	0.000408636	0.00786755	-1.89986	TB-EOT	Downregulated
P62330	P62330	>SP|P62330|ARF6_HUMAN ADP-ribosylation factor 6 OS=Homo sapiens OX=9606 GN=ARF6 PE=1 SV=2	ARF6	2	1	5840.3	45162	116720	45801	44408	132290	29081	26473	56080	199030	0.0150535	0.0673425	-1.08241	TB-EOT	Non significant
P62333	P62333	>SP|P62333|PRS10_HUMAN 26S proteasome regulatory subunit 10B OS=Homo sapiens OX=9606 GN=PSMC6 PE=1 SV=1	PSMC6	5	1	13444	43628	225160	77343	91626	137780	34318	57990	76912	171810	0.187615	0.339717	-0.463618	TB-EOT	Non significant
P62424	P62424	>SP|P62424|RL7A_HUMAN 60S ribosomal protein L7a OS=Homo sapiens OX=9606 GN=RPL7A PE=1 SV=2	RPL7A	3	1	14091	153030	98997	48283	41106	313620	21859	48135	51957	623240	0.00101335	0.0125309	-1.92356	TB-EOT	Downregulated
P62701	P62701;Q8TD47;P22090	>SP|P62701|RS4X_HUMAN 40S ribosomal protein S4, X isoform OS=Homo sapiens OX=9606 GN=RPS4X PE=1 SV=2	RPS4X	6;2;2	3	79923	580620	620840	325810	208180	1498200	98803	183510	313880	2547500	0.000424284	0.00806671	-1.75511	TB-EOT	Downregulated
P62714	P62714	>SP|P62714|PP2AB_HUMAN Serine/threonine-protein phosphatase 2A catalytic subunit beta isoform OS=Homo sapiens OX=9606 GN=PPP2CB PE=1 SV=1	PPP2CB	2	1	27005	43840	129600	78662	83083	123130	46538	65718	71004	197850	0.869618	0.914091	-0.0441514	TB-EOT	Non significant
P62753	P62753	>SP|P62753|RS6_HUMAN 40S ribosomal protein S6 OS=Homo sapiens OX=9606 GN=RPS6 PE=1 SV=1	RPS6	5	1	44521	384770	486850	147830	86360	682990	28903	123280	174110	1220300	0.000226584	0.00615419	-2.04542	TB-EOT	Downregulated
P62805	P62805	>SP|P62805|H4_HUMAN Histone H4 OS=Homo sapiens OX=9606 GN=HIST1H4A PE=1 SV=2	HIST1H4A	8	1	371440	285610	1965100	424770	20701000	1942100	1149700	3607700	728080	2583800	0.275387	0.4386	1.03424	TB-EOT	Non significant
P62820	P62820;P62820-2;P62820-3	>SP|P62820|RAB1A_HUMAN Ras-related protein Rab-1A OS=Homo sapiens OX=9606 GN=RAB1A PE=1 SV=3;>SP|P62820-2|RAB1A_HUMAN Isoform 2 of Ras-related protein Rab-1A OS=Homo sapiens OX=9606 GN=RAB1A;>SP|P62820-3|RAB1A_HUMAN Isoform 3 of Ras-related protein Rab-1A OS=	RAB1A	4;3;2	3	234040	419970	1497500	489250	741220	1194700	281660	282700	1439900	1855000	0.282219	0.447079	-0.376269	TB-EOT	Non significant
P62826	P62826	>SP|P62826|RAN_HUMAN GTP-binding nuclear protein Ran OS=Homo sapiens OX=9606 GN=RAN PE=1 SV=3	RAN	6	1	37539	512730	1254900	509850	274460	1539000	260400	293530	377820	2402900	0.00497626	0.0333431	-1.56972	TB-EOT	Downregulated
P62829	P62829	>SP|P62829|RL23_HUMAN 60S ribosomal protein L23 OS=Homo sapiens OX=9606 GN=RPL23 PE=1 SV=1	RPL23	2	1	19178	83144	112740	71047	39633	123210	50093	45254	92637	204220	0.1873	0.339551	-0.529202	TB-EOT	Non significant
P62851	P62851	>SP|P62851|RS25_HUMAN 40S ribosomal protein S25 OS=Homo sapiens OX=9606 GN=RPS25 PE=1 SV=1	RPS25	4	1	17484	164440	179300	69596	51803	155090	22792	36932	79266	412600	0.00202583	0.0195019	-1.51767	TB-EOT	Downregulated
P62854	P62854;Q5JNZ5	>SP|P62854|RS26_HUMAN 40S ribosomal protein S26 OS=Homo sapiens OX=9606 GN=RPS26 PE=1 SV=3;>SP|Q5JNZ5|RS26L_HUMAN Putative 40S ribosomal protein S26-like 1 OS=Homo sapiens OX=9606 GN=RPS26P11 PE=5 SV=1	RPS26;RPS26P11	2;1	2	49984	216480	220150	263960	192910	811760	39369	76349	101170	880680	0.0129277	0.0608507	-1.30735	TB-EOT	Non significant
P62857	P62857	>SP|P62857|RS28_HUMAN 40S ribosomal protein S28 OS=Homo sapiens OX=9606 GN=RPS28 PE=1 SV=1	RPS28	2	1	91250	63458	186930	63404	67608	157330	66058	50242	124000	284030	0.650053	0.757066	-0.183386	TB-EOT	Non significant
P62879	P62879;Q9HAV0;P62879-2;P16520-2;P16520;Q9BRK4	>SP|P62879|GBB2_HUMAN Guanine nucleotide-binding protein G(I)/G(S)/G(T) subunit beta-2 OS=Homo sapiens OX=9606 GN=GNB2 PE=1 SV=3;>SP|Q9HAV0|GBB4_HUMAN Guanine nucleotide-binding protein subunit beta-4 OS=Homo sapiens OX=9606 GN=GNB4 PE=1 SV=3	GNB2;GNB4	3;1;1;0;0;1	6	52385	278950	1281100	738670	668820	1670400	205590	316820	418290	1781900	0.059996	0.164718	-0.909898	TB-EOT	Non significant
P62906	P62906	>SP|P62906|RL10A_HUMAN 60S ribosomal protein L10a OS=Homo sapiens OX=9606 GN=RPL10A PE=1 SV=2	RPL10A	4	1	34933	543300	1444100	268610	204360	983610	105740	190360	318910	1907000	0.0001818	0.00541927	-2.00033	TB-EOT	Downregulated
P62910	P62910	>SP|P62910|RL32_HUMAN 60S ribosomal protein L32 OS=Homo sapiens OX=9606 GN=RPL32 PE=1 SV=2	RPL32	2	1	8178.2	164150	118570	57345	28264	319050	16064	39608	33086	508440	0.000244012	0.0063594	-2.35568	TB-EOT	Downregulated
P62913	P62913;P62913-2	>SP|P62913|RL11_HUMAN 60S ribosomal protein L11 OS=Homo sapiens OX=9606 GN=RPL11 PE=1 SV=2;>SP|P62913-2|RL11_HUMAN Isoform 2 of 60S ribosomal protein L11 OS=Homo sapiens OX=9606 GN=RPL11	RPL11	2;2	2	15479	188340	463440	90895	43647	760000	8341	47240	108680	1426100	3.29083e-05	0.00374789	-3.04256	TB-EOT	Downregulated
P62917	P62917	>SP|P62917|RL8_HUMAN 60S ribosomal protein L8 OS=Homo sapiens OX=9606 GN=RPL8 PE=1 SV=2	RPL8	5	1	64425	483400	398790	179440	126620	1457900	47293	106190	242850	1863500	0.000297427	0.00655633	-2.09195	TB-EOT	Downregulated
P62937	P62937;P62937-2;P0DN26;A0A0B4J2A2;A0A075B767;A0A075B759;Q9Y536;F5H284;P0DN37	>SP|P62937|PPIA_HUMAN Peptidyl-prolyl cis-trans isomerase A OS=Homo sapiens OX=9606 GN=PPIA PE=1 SV=2;>SP|P62937-2|PPIA_HUMAN Isoform 2 of Peptidyl-prolyl cis-trans isomerase A OS=Homo sapiens OX=9606 GN=PPIA	PPIA	8;6;2;2;2;2;2;2;1	9	525770	625710	4531900	3076100	1608700	3781300	1524300	1774700	1882600	5950600	0.956356	0.975599	-0.0202286	TB-EOT	Non significant
P62979	P62979;P62987;P0CG47;P0CG48	>SP|P62979|RS27A_HUMAN Ubiquitin-40S ribosomal protein S27a OS=Homo sapiens OX=9606 GN=RPS27A PE=1 SV=2;>SP|P62987|RL40_HUMAN Ubiquitin-60S ribosomal protein L40 OS=Homo sapiens OX=9606 GN=UBA52 PE=1 SV=2;>SP|P0CG47|UBB_HUMAN Polyubiquitin-B OS=Homo sapiens O	RPS27A;UBA52;UBB;UBC	5;4;4;4	4	2105500	1592000	3489800	3308600	2467100	7567100	828030	1369100	3589600	6339800	0.712728	0.805345	-0.13586	TB-EOT	Non significant
P62993	P62993;P62993-2	>SP|P62993|GRB2_HUMAN Growth factor receptor-bound protein 2 OS=Homo sapiens OX=9606 GN=GRB2 PE=1 SV=1;>SP|P62993-2|GRB2_HUMAN Isoform 2 of Growth factor receptor-bound protein 2 OS=Homo sapiens OX=9606 GN=GRB2	GRB2	9;7	2	403290	398830	1281900	618030	386820	1110100	206200	306210	507230	1340900	0.207641	0.360841	-0.434027	TB-EOT	Non significant
P63000	P63000;P63000-2;P60763	>SP|P63000|RAC1_HUMAN Ras-related C3 botulinum toxin substrate 1 OS=Homo sapiens OX=9606 GN=RAC1 PE=1 SV=1;>SP|P63000-2|RAC1_HUMAN Isoform B of Ras-related C3 botulinum toxin substrate 1 OS=Homo sapiens OX=9606 GN=RAC1;>SP|P60763|RAC3_HUMAN Ras-related C3 bot	RAC1;RAC3	2;2;1	3	197590	922210	2298300	892590	884190	3432900	337580	477850	1016500	3768300	0.000815338	0.011188	-1.21849	TB-EOT	Downregulated
P63010-3	P63010-3;P63010;P63010-2	>SP|P63010-3|AP2B1_HUMAN Isoform 3 of AP-2 complex subunit beta OS=Homo sapiens OX=9606 GN=AP2B1;>SP|P63010|AP2B1_HUMAN AP-2 complex subunit beta OS=Homo sapiens OX=9606 GN=AP2B1 PE=1 SV=1;>SP|P63010-2|AP2B1_HUMAN Isoform 2 of AP-2 complex subunit beta OS=Hom	AP2B1	3;3;3	3	27849	18218	106260	67323	79917	107200	34198	27940	80732	166240	0.589214	0.710138	0.168702	TB-EOT	Non significant
P63092-3	P63092-3;P63092-2;P63092;P63092-4;Q5JWF2-2;Q5JWF2	>SP|P63092-3|GNAS2_HUMAN Isoform 3 of Guanine nucleotide-binding protein G(s) subunit alpha isoforms short OS=Homo sapiens OX=9606 GN=GNAS;>SP|P63092-2|GNAS2_HUMAN Isoform Gnas-2 of Guanine nucleotide-binding protein G(s) subunit alpha isoforms short OS=Homo	GNAS	4;4;4;4;4;4	6	28699	60101	167810	117920	145090	368440	28141	52305	93553	349740	0.0517317	0.145968	-0.715412	TB-EOT	Non significant
P63098	P63098;Q96LZ3	>SP|P63098|CANB1_HUMAN Calcineurin subunit B type 1 OS=Homo sapiens OX=9606 GN=PPP3R1 PE=1 SV=2	PPP3R1	4;1	2	61682	11593	73772	57128	61610	108560	20208	30750	89228	131960	0.211468	0.365504	0.551856	TB-EOT	Non significant
P63104	P63104;P63104-2	>SP|P63104|1433Z_HUMAN 14-3-3 protein zeta/delta OS=Homo sapiens OX=9606 GN=YWHAZ PE=1 SV=1;>SP|P63104-2|1433Z_HUMAN Isoform 2 of 14-3-3 protein zeta/delta OS=Homo sapiens OX=9606 GN=YWHAZ	YWHAZ	11;7	2	2274600	4285200	17694000	7528500	7934100	19548000	5243800	4096100	10375000	20035000	0.199701	0.351964	-0.376151	TB-EOT	Non significant
P63208	P63208;P63208-2	>SP|P63208|SKP1_HUMAN S-phase kinase-associated protein 1 OS=Homo sapiens OX=9606 GN=SKP1 PE=1 SV=2;>SP|P63208-2|SKP1_HUMAN Isoform 2 of S-phase kinase-associated protein 1 OS=Homo sapiens OX=9606 GN=SKP1	SKP1	6;4	2	477830	92979	493170	451770	333200	699220	149830	194040	1012600	508750	0.0800869	0.196471	0.861263	TB-EOT	Non significant
P63241	P63241;P63241-2;Q6IS14;Q9GZV4	>SP|P63241|IF5A1_HUMAN Eukaryotic translation initiation factor 5A-1 OS=Homo sapiens OX=9606 GN=EIF5A PE=1 SV=2;>SP|P63241-2|IF5A1_HUMAN Isoform 2 of Eukaryotic translation initiation factor 5A-1 OS=Homo sapiens OX=9606 GN=EIF5A;>SP|Q6IS14|IF5AL_HUMAN Eukaryo	EIF5A;EIF5AL1;EIF5A2	7;6;5;4	4	913630	938880	4368900	1637200	1308200	3991000	1170300	959340	2141500	4302100	0.309763	0.474337	-0.304821	TB-EOT	Non significant
P63244	P63244	>SP|P63244|RACK1_HUMAN Receptor of activated protein C kinase 1 OS=Homo sapiens OX=9606 GN=RACK1 PE=1 SV=3	GNB2L1	11	1	98526	716610	4239400	585730	840080	1676100	460770	586030	1013600	2486900	0.0251695	0.0936011	-1.0976	TB-EOT	Non significant
P67775	P67775;P67775-2	>SP|P67775|PP2AA_HUMAN Serine/threonine-protein phosphatase 2A catalytic subunit alpha isoform OS=Homo sapiens OX=9606 GN=PPP2CA PE=1 SV=1;>SP|P67775-2|PP2AA_HUMAN Isoform 2 of Serine/threonine-protein phosphatase 2A catalytic subunit alpha isoform OS=Homo s	PPP2CA	2;2	2	229570	132410	926520	369130	324430	762880	273240	256900	423670	1222800	0.82925	0.89137	-0.0702076	TB-EOT	Non significant
P67809	P67809;P16989-2;P16989-3;Q9Y2T7;P16989	>SP|P67809|YBOX1_HUMAN Nuclease-sensitive element-binding protein 1 OS=Homo sapiens OX=9606 GN=YBX1 PE=1 SV=3	YBX1	3;1;1;1;1	5	6416.5	58170	73830	33830	23359	182970	18751	19603	8030	238940	0.00127152	0.0147632	-2.04119	TB-EOT	Downregulated
P67936	P67936;Q2TAC2-2;Q2TAC2	>SP|P67936|TPM4_HUMAN Tropomyosin alpha-4 chain OS=Homo sapiens OX=9606 GN=TPM4 PE=1 SV=3	TPM4	2;0;0	3	10764000	989730	7333000	2896700	2529800	7568600	721420	1284700	3030500	7764500	0.96793	0.982791	-0.0281821	TB-EOT	Non significant
P68036-2	P68036-2;P68036;P68036-3;A0A1B0GUS4	>SP|P68036-2|UB2L3_HUMAN Isoform 2 of Ubiquitin-conjugating enzyme E2 L3 OS=Homo sapiens OX=9606 GN=UBE2L3;>SP|P68036|UB2L3_HUMAN Ubiquitin-conjugating enzyme E2 L3 OS=Homo sapiens OX=9606 GN=UBE2L3 PE=1 SV=1;>SP|P68036-3|UB2L3_HUMAN Isoform 3 of Ubiquitin-co	UBE2L3	4;4;4;3	4	78447	128520	421770	202200	229900	588230	202600	165840	225470	645140	0.385376	0.539792	-0.265774	TB-EOT	Non significant
P68366-2	P68366-2;P68366	>SP|P68366-2|TBA4A_HUMAN Isoform 2 of Tubulin alpha-4A chain OS=Homo sapiens OX=9606 GN=TUBA4A;>SP|P68366|TBA4A_HUMAN Tubulin alpha-4A chain OS=Homo sapiens OX=9606 GN=TUBA4A PE=1 SV=1	TUBA4A	3;3	2	13321	37818	187000	122710	180240	102570	43887	135610	185050	113980	0.195225	0.347937	0.655318	TB-EOT	Non significant
P68402	P68402;P68402-3;P68402-2;P68402-4	>SP|P68402|PA1B2_HUMAN Platelet-activating factor acetylhydrolase IB subunit beta OS=Homo sapiens OX=9606 GN=PAFAH1B2 PE=1 SV=1;>SP|P68402-3|PA1B2_HUMAN Isoform 3 of Platelet-activating factor acetylhydrolase IB subunit beta OS=Homo sapiens OX=9606 GN=PAFAH1	PAFAH1B2	3;2;2;2	4	943.96	2062.4	10652	3755.2	2658.1	7559.9	2233.4	3249.6	4483.7	12832	0.110386	0.239853	-0.530295	TB-EOT	Non significant
P68871	P68871	>SP|P68871|HBB_HUMAN Hemoglobin subunit beta OS=Homo sapiens OX=9606 GN=HBB PE=1 SV=2	HBB	5	1	8012100	1598500	42331000	53164000	5441100	2697100	75420000	50607000	14796000	3596900	0.00981577	0.0520202	3.01167	TB-EOT	Non significant
P69891	P69891;P69892	>SP|P69891|HBG1_HUMAN Hemoglobin subunit gamma-1 OS=Homo sapiens OX=9606 GN=HBG1 PE=1 SV=2;>SP|P69892|HBG2_HUMAN Hemoglobin subunit gamma-2 OS=Homo sapiens OX=9606 GN=HBG2 PE=1 SV=2	HBG1;HBG2	6;5	2	138800	183600	1630500	738030	370140	125690	2577900	138670	214120	121460	0.189624	0.342539	1.39597	TB-EOT	Non significant
P78324-4	P78324-4;P78324;P78324-2;Q5TFQ8;Q9P1W8-3;O00241-2;Q9P1W8-4;Q9P1W8-2;Q9P1W8;O00241	>SP|P78324-4|SHPS1_HUMAN Isoform 4 of Tyrosine-protein phosphatase non-receptor type substrate 1 OS=Homo sapiens OX=9606 GN=SIRPA;>SP|P78324|SHPS1_HUMAN Tyrosine-protein phosphatase non-receptor type substrate 1 OS=Homo sapiens OX=9606 GN=SIRPA PE=1 SV=2;>SP|	SIRPA;SIRPB1	7;7;7;5;1;1;1;1;1;1	10	813890	276160	809520	544330	999280	1515700	66250	195580	523280	1295800	0.699163	0.794788	-0.242461	TB-EOT	Non significant
P78330	P78330	>SP|P78330|SERB_HUMAN Phosphoserine phosphatase OS=Homo sapiens OX=9606 GN=PSPH PE=1 SV=2	PSPH	3	1	25063	32940	111500	79368	71660	169940	51273	42773	85615	231590	0.615608	0.732088	-0.146129	TB-EOT	Non significant
P78344-2	P78344-2;P78344	>SP|P78344-2|IF4G2_HUMAN Isoform 2 of Eukaryotic translation initiation factor 4 gamma 2 OS=Homo sapiens OX=9606 GN=EIF4G2;>SP|P78344|IF4G2_HUMAN Eukaryotic translation initiation factor 4 gamma 2 OS=Homo sapiens OX=9606 GN=EIF4G2 PE=1 SV=1	EIF4G2	3;3	2	11424	18468	56079	33325	30139	78192	17250	22722	30297	155380	0.0875764	0.205245	-0.535269	TB-EOT	Non significant
P78371-2	P78371-2;P78371	>SP|P78371-2|TCPB_HUMAN Isoform 2 of T-complex protein 1 subunit beta OS=Homo sapiens OX=9606 GN=CCT2;>SP|P78371|TCPB_HUMAN T-complex protein 1 subunit beta OS=Homo sapiens OX=9606 GN=CCT2 PE=1 SV=4	CCT2	8;8	2	45088	82680	437970	176170	311120	317640	78753	153810	427850	451050	0.898877	0.935152	0.0462184	TB-EOT	Non significant
P78527-2	P78527-2;P78527	>SP|P78527-2|PRKDC_HUMAN Isoform 2 of DNA-dependent protein kinase catalytic subunit OS=Homo sapiens OX=9606 GN=PRKDC;>SP|P78527|PRKDC_HUMAN DNA-dependent protein kinase catalytic subunit OS=Homo sapiens OX=9606 GN=PRKDC PE=1 SV=3	PRKDC	4;4	2	4781.5	2780.2	15937	8728.6	11041	13226	5070.1	4564.5	17777	16054	0.139533	0.277788	0.479501	TB-EOT	Non significant
P78559	P78559;P78559-2;P46821	>SP|P78559|MAP1A_HUMAN Microtubule-associated protein 1A OS=Homo sapiens OX=9606 GN=MAP1A PE=1 SV=6;>SP|P78559-2|MAP1A_HUMAN Isoform 2 of Microtubule-associated protein 1A OS=Homo sapiens OX=9606 GN=MAP1A	MAP1A	9;9;1	3	124620	35452	198400	51795	61033	221560	58293	50663	269770	99636	0.455907	0.599338	0.420018	TB-EOT	Non significant
P80108	P80108	>SP|P80108|PHLD_HUMAN Phosphatidylinositol-glycan-specific phospholipase D OS=Homo sapiens OX=9606 GN=GPLD1 PE=1 SV=3	GPLD1	3	1	9417.8	7795.5	41839	56779	75557	27964	50656	78704	42313	29604	0.00165721	0.0172645	1.79106	TB-EOT	Upregulated
P80188	P80188;P80188-2	>SP|P80188|NGAL_HUMAN Neutrophil gelatinase-associated lipocalin OS=Homo sapiens OX=9606 GN=LCN2 PE=1 SV=2;>SP|P80188-2|NGAL_HUMAN Isoform 2 of Neutrophil gelatinase-associated lipocalin OS=Homo sapiens OX=9606 GN=LCN2	LCN2	9;8	2	1324300	95583	2783300	464170	1645900	1263500	604790	220290	11574000	728060	0.126796	0.263826	1.47197	TB-EOT	Non significant
P80217	P80217;P80217-2	>SP|P80217|IN35_HUMAN Interferon-induced 35 kDa protein OS=Homo sapiens OX=9606 GN=IFI35 PE=1 SV=5;>SP|P80217-2|IN35_HUMAN Isoform 2 of Interferon-induced 35 kDa protein OS=Homo sapiens OX=9606 GN=IFI35	IFI35	5;5	2	40891	58139	110880	97597	111840	136270	46108	77101	110580	215730	0.449801	0.592849	0.208312	TB-EOT	Non significant
P80303-2	P80303-2;P80303	>SP|P80303-2|NUCB2_HUMAN Isoform 2 of Nucleobindin-2 OS=Homo sapiens OX=9606 GN=NUCB2;>SP|P80303|NUCB2_HUMAN Nucleobindin-2 OS=Homo sapiens OX=9606 GN=NUCB2 PE=1 SV=3	NUCB2	15;15	2	3567600	159680	1322600	1185100	1452900	966910	294190	423220	12975000	867640	0.029856	0.104154	2.03334	TB-EOT	Non significant
P80511	P80511	>SP|P80511|S10AC_HUMAN Protein S100-A12 OS=Homo sapiens OX=9606 GN=S100A12 PE=1 SV=2	S100A12	3	1	3986900	93855	907220	41129	3547900	235580	334560	286830	1347500	189990	0.0863819	0.204598	2.24415	TB-EOT	Non significant
P80723	P80723;P80723-2	>SP|P80723|BASP1_HUMAN Brain acid soluble protein 1 OS=Homo sapiens OX=9606 GN=BASP1 PE=1 SV=2;>SP|P80723-2|BASP1_HUMAN Isoform 2 of Brain acid soluble protein 1 OS=Homo sapiens OX=9606 GN=BASP1	BASP1	12;9	2	7486000	438080	2404400	725170	1806400	3397400	686300	539720	4181800	2300700	0.351535	0.511171	0.751155	TB-EOT	Non significant
P81605	P81605;P81605-2	>SP|P81605|DCD_HUMAN Dermcidin OS=Homo sapiens OX=9606 GN=DCD PE=1 SV=2;>SP|P81605-2|DCD_HUMAN Isoform 2 of Dermcidin OS=Homo sapiens OX=9606 GN=DCD	DCD	2;2	2	300140	250200	375780	554270	343720	362390	291750	373080	406240	441900	0.0257517	0.0944141	0.932789	TB-EOT	Non significant
P82970	P82970	>SP|P82970|HMGN5_HUMAN High mobility group nucleosome-binding domain-containing protein 5 OS=Homo sapiens OX=9606 GN=HMGN5 PE=1 SV=1	HMGN5	2	1	397360	70352	217030	121670	167550	466050	265770	138720	1246300	192920	0.0619714	0.167125	1.33591	TB-EOT	Non significant
P83731	P83731	>SP|P83731|RL24_HUMAN 60S ribosomal protein L24 OS=Homo sapiens OX=9606 GN=RPL24 PE=1 SV=1	RPL24	2	1	565.62	62214	70120	25314	12571	149650	1974.8	14288	17925	249740	0.000898855	0.0114887	-3.21713	TB-EOT	Downregulated
P84077	P84077;P61204;P61204-2	>SP|P84077|ARF1_HUMAN ADP-ribosylation factor 1 OS=Homo sapiens OX=9606 GN=ARF1 PE=1 SV=2;>SP|P61204|ARF3_HUMAN ADP-ribosylation factor 3 OS=Homo sapiens OX=9606 GN=ARF3 PE=1 SV=2;>SP|P61204-2|ARF3_HUMAN Isoform 2 of ADP-ribosylation factor 3 OS=Homo sapiens	ARF1;ARF3	2;2;1	3	142640	346480	2518100	744080	1070000	1855800	488570	598770	1524100	2393300	0.378247	0.534182	-0.348499	TB-EOT	Non significant
P84090	P84090	>SP|P84090|ERH_HUMAN Enhancer of rudimentary homolog OS=Homo sapiens OX=9606 GN=ERH PE=1 SV=1	ERH	2	1	336180	44847	183980	101350	191050	127760	78146	63432	267640	319430	0.114427	0.245825	0.937846	TB-EOT	Non significant
P84095	P84095;Q9H4E5-2;P17081;Q9H4E5	>SP|P84095|RHOG_HUMAN Rho-related GTP-binding protein RhoG OS=Homo sapiens OX=9606 GN=RHOG PE=1 SV=1	RHOG	2;0;0;0	4	7130.7	33143	149360	38157	75013	113980	22528	39401	53697	198960	0.0424534	0.13032	-0.851956	TB-EOT	Non significant
P84103-2	P84103-2;P84103	>SP|P84103-2|SRSF3_HUMAN Isoform 2 of Serine/arginine-rich splicing factor 3 OS=Homo sapiens OX=9606 GN=SRSF3;>SP|P84103|SRSF3_HUMAN Serine/arginine-rich splicing factor 3 OS=Homo sapiens OX=9606 GN=SRSF3 PE=1 SV=1	SRSF3	2;2	2	21255	88700	99196	40647	63821	180910	22628	37176	155950	226020	0.0751642	0.190893	-0.789607	TB-EOT	Non significant
P98082-2	P98082-2;P98082-3;P98082	>SP|P98082-2|DAB2_HUMAN Isoform 2 of Disabled homolog 2 OS=Homo sapiens OX=9606 GN=DAB2;>SP|P98082-3|DAB2_HUMAN Isoform 3 of Disabled homolog 2 OS=Homo sapiens OX=9606 GN=DAB2;>SP|P98082|DAB2_HUMAN Disabled homolog 2 OS=Homo sapiens OX=9606 GN=DAB2 PE=1 SV=3	DAB2	2;2;2	3	11245	29792	72589	32213	25611	97503	12283	17600	21602	112110	0.00186667	0.0188172	-1.03821	TB-EOT	Downregulated
P98088	P98088	>SP|P98088|MUC5A_HUMAN Mucin-5AC OS=Homo sapiens OX=9606 GN=MUC5AC PE=1 SV=4	MUC5AC	76	1	14618000	1658300	15432000	2561700	4860200	16182000	3476400	3152600	101680000	6469100	0.312911	0.477369	0.948789	TB-EOT	Non significant
P98160	P98160	>SP|P98160|PGBM_HUMAN Basement membrane-specific heparan sulfate proteoglycan core protein OS=Homo sapiens OX=9606 GN=HSPG2 PE=1 SV=4	HSPG2	4	1	70558	30250	31929	106480	79516	27958	37025	82221	40926	24644	0.00209587	0.0200492	2.04054	TB-EOT	Upregulated
P99999	P99999;CON__P62894	>SP|P99999|CYC_HUMAN Cytochrome c OS=Homo sapiens OX=9606 GN=CYCS PE=1 SV=2	CYCS	3;1	2	360910	238400	397480	317990	162890	830920	257480	93036	248060	1237900	0.372939	0.529142	-0.492265	TB-EOT	Non significant
Q00169	Q00169	>SP|Q00169|PIPNA_HUMAN Phosphatidylinositol transfer protein alpha isoform OS=Homo sapiens OX=9606 GN=PITPNA PE=1 SV=2	PITPNA	10	1	98791	448000	1738500	672820	637700	1951600	722260	553910	434660	2602200	0.0864175	0.204598	-0.819265	TB-EOT	Non significant
Q00577	Q00577;Q9UJV8-2;Q9UJV8	>SP|Q00577|PURA_HUMAN Transcriptional activator protein Pur-alpha OS=Homo sapiens OX=9606 GN=PURA PE=1 SV=2	PURA	4;0;0	3	14373	45198	219660	86763	94880	78973	93016	89377	96401	145420	0.605447	0.723967	0.243599	TB-EOT	Non significant
Q00610-2	Q00610-2;Q00610;P53675-2;P53675	>SP|Q00610-2|CLH1_HUMAN Isoform 2 of Clathrin heavy chain 1 OS=Homo sapiens OX=9606 GN=CLTC;>SP|Q00610|CLH1_HUMAN Clathrin heavy chain 1 OS=Homo sapiens OX=9606 GN=CLTC PE=1 SV=5	CLTC	35;35;6;6	4	344810	916720	8221900	1926700	1466400	4151700	529490	1623800	778620	4838700	0.0241984	0.0906548	-1.05602	TB-EOT	Non significant
Q00688	Q00688	>SP|Q00688|FKBP3_HUMAN Peptidyl-prolyl cis-trans isomerase FKBP3 OS=Homo sapiens OX=9606 GN=FKBP3 PE=1 SV=1	FKBP3	2	1	15884	51865	236670	32397	59743	139010	36567	26952	44880	150400	0.00724465	0.0429473	-1.06964	TB-EOT	Downregulated
Q00722-3	Q00722-3;Q00722-2;Q00722	>SP|Q00722-3|PLCB2_HUMAN Isoform 3 of 1-phosphatidylinositol 4,5-bisphosphate phosphodiesterase beta-2 OS=Homo sapiens OX=9606 GN=PLCB2;>SP|Q00722-2|PLCB2_HUMAN Isoform 2 of 1-phosphatidylinositol 4,5-bisphosphate phosphodiesterase beta-2 OS=Homo sapiens OX=	PLCB2	4;4;4	3	40092	40375	139730	71311	159040	225140	20338	43414	48491	274300	0.192611	0.34517	-0.539968	TB-EOT	Non significant
Q00796	Q00796;Q00796-2	>SP|Q00796|DHSO_HUMAN Sorbitol dehydrogenase OS=Homo sapiens OX=9606 GN=SORD PE=1 SV=4	SORD	3;1	2	9235.7	14508	82151	44378	25793	84042	29343	46729	102230	85101	0.67305	0.775537	0.179026	TB-EOT	Non significant
Q00839-2	Q00839-2;Q00839	>SP|Q00839-2|HNRPU_HUMAN Isoform 2 of Heterogeneous nuclear ribonucleoprotein U OS=Homo sapiens OX=9606 GN=HNRNPU;>SP|Q00839|HNRPU_HUMAN Heterogeneous nuclear ribonucleoprotein U OS=Homo sapiens OX=9606 GN=HNRNPU PE=1 SV=6	HNRNPU	10;10	2	150710	121070	802920	337210	242090	705970	308240	265850	688230	1089700	0.904154	0.939357	0.0437926	TB-EOT	Non significant
Q01082-3	Q01082-3;Q01082-2;Q01082;P11277-3;P11277;P11277-2	>SP|Q01082-3|SPTB2_HUMAN Isoform 2 of Spectrin beta chain, non-erythrocytic 1 OS=Homo sapiens OX=9606 GN=SPTBN1;>SP|Q01082-2|SPTB2_HUMAN Isoform Short of Spectrin beta chain, non-erythrocytic 1 OS=Homo sapiens OX=9606 GN=SPTBN1;>SP|Q01082|SPTB2_HUMAN Spectrin	SPTBN1	6;6;6;0;0;0	6	128730	17265	96175	51982	160260	64256	20411	41823	259680	44490	0.0177001	0.0743696	1.61113	TB-EOT	Non significant
Q01105-3	Q01105-3;Q01105-4;Q01105-2;Q01105;P0DME0	>SP|Q01105-3|SET_HUMAN Isoform 3 of Protein SET OS=Homo sapiens OX=9606 GN=SET;>SP|Q01105-4|SET_HUMAN Isoform 4 of Protein SET OS=Homo sapiens OX=9606 GN=SET;>SP|Q01105-2|SET_HUMAN Isoform 2 of Protein SET OS=Homo sapiens OX=9606 GN=SET;>SP|Q01105|SET_HUMAN Pr	SET;SETSIP	6;6;6;6;5	5	1156500	826600	2771500	1316000	901400	6051000	1447700	868490	3030400	8317800	0.322957	0.486354	-0.45731	TB-EOT	Non significant
Q01459	Q01459	>SP|Q01459|DIAC_HUMAN Di-N-acetylchitobiase OS=Homo sapiens OX=9606 GN=CTBS PE=1 SV=1	CTBS	6	1	748200	124770	494720	656850	682880	775830	108210	228350	1131000	2506200	0.419796	0.563953	0.499287	TB-EOT	Non significant
Q01469	Q01469;A8MUU1	>SP|Q01469|FABP5_HUMAN Fatty acid-binding protein 5 OS=Homo sapiens OX=9606 GN=FABP5 PE=1 SV=3	FABP5	7;1	2	995370	684310	2567400	1066100	912730	2429000	252140	463720	533220	3071100	0.109115	0.238211	-0.745635	TB-EOT	Non significant
Q01518-2	Q01518-2;Q01518;P40123-3	>SP|Q01518-2|CAP1_HUMAN Isoform 2 of Adenylyl cyclase-associated protein 1 OS=Homo sapiens OX=9606 GN=CAP1;>SP|Q01518|CAP1_HUMAN Adenylyl cyclase-associated protein 1 OS=Homo sapiens OX=9606 GN=CAP1 PE=1 SV=5	CAP1	24;24;0	3	1790300	2682800	18287000	4692300	7599000	13351000	1222000	2914300	4703200	27059000	0.0145438	0.0660334	-0.993946	TB-EOT	Non significant
Q01813	Q01813;Q01813-2	>SP|Q01813|PFKAP_HUMAN ATP-dependent 6-phosphofructokinase, platelet type OS=Homo sapiens OX=9606 GN=PFKP PE=1 SV=2;>SP|Q01813-2|PFKAP_HUMAN Isoform 2 of ATP-dependent 6-phosphofructokinase, platelet type OS=Homo sapiens OX=9606 GN=PFKP	PFKP	7;7	2	4403.1	45161	128780	40070	99321	144830	28751	42819	56481	269160	0.060218	0.16503	-1.05133	TB-EOT	Non significant
Q01995	Q01995	>SP|Q01995|TAGL_HUMAN Transgelin OS=Homo sapiens OX=9606 GN=TAGLN PE=1 SV=4	TAGLN	2	1	4484.1	19884	46601	33472	19480	30455	214080	100750	34305	38208	0.26924	0.431977	1.01572	TB-EOT	Non significant
Q02487-2	Q02487-2;Q02487	>SP|Q02487-2|DSC2_HUMAN Isoform 2B of Desmocollin-2 OS=Homo sapiens OX=9606 GN=DSC2;>SP|Q02487|DSC2_HUMAN Desmocollin-2 OS=Homo sapiens OX=9606 GN=DSC2 PE=1 SV=1	DSC2	2;2	2	24124	9822	22191	63678	80030	43022	4451	13176	63325	25854	0.0616801	0.166635	1.17991	TB-EOT	Non significant
Q02543	Q02543	>SP|Q02543|RL18A_HUMAN 60S ribosomal protein L18a OS=Homo sapiens OX=9606 GN=RPL18A PE=1 SV=2	RPL18A	5	1	38472	216860	471480	166270	131120	722250	57772	132890	120130	922010	0.000192664	0.0054267	-1.5572	TB-EOT	Downregulated
Q02750	Q02750;Q02750-2;P36507	>SP|Q02750|MP2K1_HUMAN Dual specificity mitogen-activated protein kinase kinase 1 OS=Homo sapiens OX=9606 GN=MAP2K1 PE=1 SV=2;>SP|Q02750-2|MP2K1_HUMAN Isoform 2 of Dual specificity mitogen-activated protein kinase kinase 1 OS=Homo sapiens OX=9606 GN=MAP2K1	MAP2K1	4;3;1	3	25859	62640	285910	120900	156350	289370	47549	90341	79503	532560	0.0384682	0.119898	-0.769739	TB-EOT	Non significant
Q02790	Q02790	>SP|Q02790|FKBP4_HUMAN Peptidyl-prolyl cis-trans isomerase FKBP4 OS=Homo sapiens OX=9606 GN=FKBP4 PE=1 SV=3	FKBP4	6	1	113470	71803	287850	154150	181400	295480	140140	127250	205060	357100	0.261543	0.423649	0.335041	TB-EOT	Non significant
Q02818	Q02818	>SP|Q02818|NUCB1_HUMAN Nucleobindin-1 OS=Homo sapiens OX=9606 GN=NUCB1 PE=1 SV=4	NUCB1	11	1	1363800	314370	877010	905680	1216000	1206500	182740	267010	5370800	1382300	0.201207	0.352982	0.913374	TB-EOT	Non significant
Q02878	Q02878	>SP|Q02878|RL6_HUMAN 60S ribosomal protein L6 OS=Homo sapiens OX=9606 GN=RPL6 PE=1 SV=3	RPL6	8	1	51540	619480	804710	331170	316680	2024800	82310	256820	373170	3508800	0.000436695	0.00810015	-2.01834	TB-EOT	Downregulated
Q03135-2	Q03135-2;Q03135;P56539	>SP|Q03135-2|CAV1_HUMAN Isoform 2 of Caveolin-1 OS=Homo sapiens OX=9606 GN=CAV1;>SP|Q03135|CAV1_HUMAN Caveolin-1 OS=Homo sapiens OX=9606 GN=CAV1 PE=1 SV=4	CAV1	3;2;1	3	625100	301150	142710	615290	945210	368580	264300	397330	96342	329150	0.0818092	0.197825	1.4054	TB-EOT	Non significant
Q03591	Q03591;Q9BXR6	>SP|Q03591|FHR1_HUMAN Complement factor H-related protein 1 OS=Homo sapiens OX=9606 GN=CFHR1 PE=1 SV=2	CFHR1	2;1	2	418040	468640	251840	745540	1227000	301920	838710	1114000	437520	233870	0.00428091	0.0305693	2.13783	TB-EOT	Upregulated
Q04323	Q04323;Q04323-2	>SP|Q04323|UBXN1_HUMAN UBX domain-containing protein 1 OS=Homo sapiens OX=9606 GN=UBXN1 PE=1 SV=2;>SP|Q04323-2|UBXN1_HUMAN Isoform 2 of UBX domain-containing protein 1 OS=Homo sapiens OX=9606 GN=UBXN1	UBXN1	3;3	2	14861	35888	107520	79747	48712	140310	62529	49270	50034	112110	0.796172	0.868707	-0.0979459	TB-EOT	Non significant
Q04446	Q04446	>SP|Q04446|GLGB_HUMAN 1,4-alpha-glucan-branching enzyme OS=Homo sapiens OX=9606 GN=GBE1 PE=1 SV=3	GBE1	6	1	18900	79313	404530	114180	179420	476690	133410	188040	86850	444170	0.175156	0.323709	-0.705061	TB-EOT	Non significant
Q04637-6	Q04637-6;Q04637-7;Q04637-5;Q04637-4;Q04637-3;Q04637;Q04637-8;Q04637-9;O43432-4;O43432;O43432-3	>SP|Q04637-6|IF4G1_HUMAN Isoform E of Eukaryotic translation initiation factor 4 gamma 1 OS=Homo sapiens OX=9606 GN=EIF4G1;>SP|Q04637-7|IF4G1_HUMAN Isoform 7 of Eukaryotic translation initiation factor 4 gamma 1 OS=Homo sapiens OX=9606 GN=EIF4G1;>SP|Q04637-5|	EIF4G1	12;12;12;12;12;12;12;12;2;2;2	11	102860	214570	569670	289690	200840	1114500	38088	160300	285440	1216400	0.00672733	0.0408371	-1.2525	TB-EOT	Downregulated
Q04756	Q04756;CON__ENSEMBL:ENSBTAP00000023055	>SP|Q04756|HGFA_HUMAN Hepatocyte growth factor activator OS=Homo sapiens OX=9606 GN=HGFAC PE=1 SV=1	HGFAC	3;1	2	34950	87652	118720	181030	96341	118260	120240	205120	78422	96823	0.128227	0.264847	0.833733	TB-EOT	Non significant
Q04760-2	Q04760-2;Q04760	>SP|Q04760-2|LGUL_HUMAN Isoform 2 of Lactoylglutathione lyase OS=Homo sapiens OX=9606 GN=GLO1;>SP|Q04760|LGUL_HUMAN Lactoylglutathione lyase OS=Homo sapiens OX=9606 GN=GLO1 PE=1 SV=4	GLO1	4;4	2	110130	35942	212570	141730	177150	231900	105300	98209	589330	196530	0.0171198	0.0725326	1.0865	TB-EOT	Non significant
Q04917	Q04917	>SP|Q04917|1433F_HUMAN 14-3-3 protein eta OS=Homo sapiens OX=9606 GN=YWHAH PE=1 SV=4	YWHAH	11	1	419360	1070200	5079200	2365600	1979500	5218700	1247600	1266400	1102300	7706600	0.0429305	0.13032	-0.790052	TB-EOT	Non significant
Q05209-2	Q05209-2;Q05209-3;Q05209	>SP|Q05209-2|PTN12_HUMAN Isoform 2 of Tyrosine-protein phosphatase non-receptor type 12 OS=Homo sapiens OX=9606 GN=PTPN12;>SP|Q05209-3|PTN12_HUMAN Isoform 3 of Tyrosine-protein phosphatase non-receptor type 12 OS=Homo sapiens OX=9606 GN=PTPN12;>SP|Q05209|PTN1	PTPN12	4;4;4	3	13463	22153	78114	41643	38382	99047	20647	41958	30747	96398	0.330159	0.489924	-0.288066	TB-EOT	Non significant
Q05655	Q05655;Q05655-2	>SP|Q05655|KPCD_HUMAN Protein kinase C delta type OS=Homo sapiens OX=9606 GN=PRKCD PE=1 SV=2;>SP|Q05655-2|KPCD_HUMAN Isoform 2 of Protein kinase C delta type OS=Homo sapiens OX=9606 GN=PRKCD	PRKCD	5;5	2	29144	75982	187140	114380	119370	262960	55028	64112	92529	267440	0.109411	0.238415	-0.463892	TB-EOT	Non significant
Q06033-2	Q06033-2;Q06033;CON__Q0V8M9	>SP|Q06033-2|ITIH3_HUMAN Isoform 2 of Inter-alpha-trypsin inhibitor heavy chain H3 OS=Homo sapiens OX=9606 GN=ITIH3;>SP|Q06033|ITIH3_HUMAN Inter-alpha-trypsin inhibitor heavy chain H3 OS=Homo sapiens OX=9606 GN=ITIH3 PE=1 SV=2	ITIH3	10;10;3	3	151200	428250	1195400	1312000	1570800	364400	2095200	3849600	1830500	456450	0.0118762	0.0578963	2.11278	TB-EOT	Non significant
Q06124-3	Q06124-3;Q06124-2;Q06124	>SP|Q06124-3|PTN11_HUMAN Isoform 3 of Tyrosine-protein phosphatase non-receptor type 11 OS=Homo sapiens OX=9606 GN=PTPN11;>SP|Q06124-2|PTN11_HUMAN Isoform 2 of Tyrosine-protein phosphatase non-receptor type 11 OS=Homo sapiens OX=9606 GN=PTPN11;>SP|Q06124|PTN1	PTPN11	4;4;4	3	10263	24417	143050	70316	59906	178460	46993	68732	37184	233330	0.236559	0.394525	-0.542675	TB-EOT	Non significant
Q06210-2	Q06210-2;Q06210;O94808	>SP|Q06210-2|GFPT1_HUMAN Isoform 2 of Glutamine--fructose-6-phosphate aminotransferase [isomerizing] 1 OS=Homo sapiens OX=9606 GN=GFPT1;>SP|Q06210|GFPT1_HUMAN Glutamine--fructose-6-phosphate aminotransferase [isomerizing] 1 OS=Homo sapiens OX=9606 GN=GFPT1 P	GFPT1	5;5;1	3	29455	80438	367160	108160	140320	203240	65289	129250	285760	212550	0.91187	0.943506	-0.0429312	TB-EOT	Non significant
Q06323-3	Q06323-3;Q06323;Q06323-2	>SP|Q06323-3|PSME1_HUMAN Isoform 3 of Proteasome activator complex subunit 1 OS=Homo sapiens OX=9606 GN=PSME1;>SP|Q06323|PSME1_HUMAN Proteasome activator complex subunit 1 OS=Homo sapiens OX=9606 GN=PSME1 PE=1 SV=1;>SP|Q06323-2|PSME1_HUMAN Isoform 2 of Protea	PSME1	11;11;11	3	1459500	697220	3605600	1929700	1653600	3951900	1032600	1085600	3372800	4950000	0.668928	0.771958	0.142068	TB-EOT	Non significant
Q06481-5	Q06481-5;Q06481-4;Q06481-2;Q06481-3;Q06481-6;Q06481	>SP|Q06481-5|APLP2_HUMAN Isoform 5 of Amyloid-like protein 2 OS=Homo sapiens OX=9606 GN=APLP2;>SP|Q06481-4|APLP2_HUMAN Isoform 4 of Amyloid-like protein 2 OS=Homo sapiens OX=9606 GN=APLP2;>SP|Q06481-2|APLP2_HUMAN Isoform 2 of Amyloid-like protein 2 OS=Homo sa	APLP2	2;2;2;2;2;2	6	9187.2	17925	34654	46158	26499	50253	13565	26562	90684	54676	0.282474	0.447079	0.423621	TB-EOT	Non significant
Q06828	Q06828	>SP|Q06828|FMOD_HUMAN Fibromodulin OS=Homo sapiens OX=9606 GN=FMOD PE=1 SV=2	FMOD	4	1	58852	19147	152170	122340	134610	118420	16738	47230	676280	125750	0.135509	0.273354	1.00042	TB-EOT	Non significant
Q06830	Q06830	>SP|Q06830|PRDX1_HUMAN Peroxiredoxin-1 OS=Homo sapiens OX=9606 GN=PRDX1 PE=1 SV=1	PRDX1	11	1	11357000	3798300	24960000	10650000	13339000	39159000	5771600	6348200	25678000	34601000	0.928619	0.956283	0.0368928	TB-EOT	Non significant
Q07020-2	Q07020-2;Q07020	>SP|Q07020-2|RL18_HUMAN Isoform 2 of 60S ribosomal protein L18 OS=Homo sapiens OX=9606 GN=RPL18;>SP|Q07020|RL18_HUMAN 60S ribosomal protein L18 OS=Homo sapiens OX=9606 GN=RPL18 PE=1 SV=2	RPL18	4;4	2	30974	248410	414630	131700	104280	567460	58004	99170	96186	888290	0.000111519	0.00458432	-1.74552	TB-EOT	Downregulated
Q07021	Q07021	>SP|Q07021|C1QBP_HUMAN Complement component 1 Q subcomponent-binding protein, mitochondrial OS=Homo sapiens OX=9606 GN=C1QBP PE=1 SV=1	C1QBP	2	1	53009	11204	43924	33660	23350	52162	10074	11511	25598	73881	0.813539	0.880573	0.123936	TB-EOT	Non significant
Q07654	Q07654	>SP|Q07654|TFF3_HUMAN Trefoil factor 3 OS=Homo sapiens OX=9606 GN=TFF3 PE=1 SV=2	TFF3	2	1	343000	71932	953350	303960	459530	310620	146540	127240	3611100	223310	0.0783522	0.19441	1.40695	TB-EOT	Non significant
Q07812-5	Q07812-5;Q07812-7;Q07812-8;Q07812;Q07812-2;Q07812-6	>SP|Q07812-5|BAX_HUMAN Isoform Epsilon of Apoptosis regulator BAX OS=Homo sapiens OX=9606 GN=BAX;>SP|Q07812-7|BAX_HUMAN Isoform Psi of Apoptosis regulator BAX OS=Homo sapiens OX=9606 GN=BAX;>SP|Q07812-8|BAX_HUMAN Isoform Sigma of Apoptosis regulator BAX OS=Ho	BAX	4;4;4;4;4;1	6	112140	135260	726400	262820	350270	877910	69102	145370	147330	1681100	0.0120954	0.0580352	-1.11256	TB-EOT	Non significant
Q07954	Q07954	>SP|Q07954|LRP1_HUMAN Prolow-density lipoprotein receptor-related protein 1 OS=Homo sapiens OX=9606 GN=LRP1 PE=1 SV=2	LRP1	14	1	95984	156620	217960	458550	237240	461160	79312	172380	146060	377140	0.774946	0.851656	0.114764	TB-EOT	Non significant
Q07955	Q07955;Q07955-3;Q07955-2	>SP|Q07955|SRSF1_HUMAN Serine/arginine-rich splicing factor 1 OS=Homo sapiens OX=9606 GN=SRSF1 PE=1 SV=2;>SP|Q07955-3|SRSF1_HUMAN Isoform ASF-3 of Serine/arginine-rich splicing factor 1 OS=Homo sapiens OX=9606 GN=SRSF1;>SP|Q07955-2|SRSF1_HUMAN Isoform ASF-2 o	SRSF1	3;2;2	3	45064	148790	108800	98030	125660	216300	134200	112750	580400	363300	0.562263	0.688014	0.320963	TB-EOT	Non significant
Q08209-3	Q08209-3;Q08209-2;Q08209;Q08209-5;P16298-2;P16298-3;P16298;P16298-4;Q08209-4;P48454-2;P48454;P48454-3	>SP|Q08209-3|PP2BA_HUMAN Isoform 3 of Serine/threonine-protein phosphatase 2B catalytic subunit alpha isoform OS=Homo sapiens OX=9606 GN=PPP3CA;>SP|Q08209-2|PP2BA_HUMAN Isoform 2 of Serine/threonine-protein phosphatase 2B catalytic subunit alpha isoform OS=H	PPP3CA;PPP3CB	6;6;6;5;4;4;4;4;3;1;1;1	12	120410	123010	618120	284530	405780	748210	180230	221470	255970	977090	0.433453	0.57781	-0.23061	TB-EOT	Non significant
Q08211	Q08211	>SP|Q08211|DHX9_HUMAN ATP-dependent RNA helicase A OS=Homo sapiens OX=9606 GN=DHX9 PE=1 SV=4	DHX9	4	1	16294	10791	48676	18651	42452	32029	10706	13896	46996	50050	0.335763	0.496731	0.340908	TB-EOT	Non significant
Q08380	Q08380	>SP|Q08380|LG3BP_HUMAN Galectin-3-binding protein OS=Homo sapiens OX=9606 GN=LGALS3BP PE=1 SV=1	LGALS3BP	18	1	5675800	5712100	14387000	27500000	9573400	27456000	2529000	3305700	25684000	17296000	0.858841	0.907385	0.0929027	TB-EOT	Non significant
Q08623-3	Q08623-3;Q08623;Q08623-4;Q08623-2	>SP|Q08623-3|HDHD1_HUMAN Isoform 3 of Pseudouridine-5-phosphatase OS=Homo sapiens OX=9606 GN=PUDP;>SP|Q08623|HDHD1_HUMAN Pseudouridine-5-phosphatase OS=Homo sapiens OX=9606 GN=PUDP PE=1 SV=3;>SP|Q08623-4|HDHD1_HUMAN Isoform 4 of Pseudouridine-5-phosphatase	HDHD1	2;2;2;1	4	120380	374720	275370	236540	175840	1163000	135340	119810	104710	1197900	0.0224494	0.0857926	-1.25039	TB-EOT	Non significant
Q08722-2	Q08722-2;Q08722-3;Q08722-4;Q08722	>SP|Q08722-2|CD47_HUMAN Isoform OA3-293 of Leukocyte surface antigen CD47 OS=Homo sapiens OX=9606 GN=CD47;>SP|Q08722-3|CD47_HUMAN Isoform OA3-305 of Leukocyte surface antigen CD47 OS=Homo sapiens OX=9606 GN=CD47;>SP|Q08722-4|CD47_HUMAN Isoform OA3-312 of Leuk	CD47	3;3;3;3	4	338050	262000	466050	696550	458900	1294400	176170	264970	609320	1029900	0.740041	0.827041	0.121113	TB-EOT	Non significant
Q08752	Q08752	>SP|Q08752|PPID_HUMAN Peptidyl-prolyl cis-trans isomerase D OS=Homo sapiens OX=9606 GN=PPID PE=1 SV=3	PPID	2	1	9087.1	22488	55081	26943	32845	75254	22410	26375	29018	77458	0.274915	0.438308	-0.332004	TB-EOT	Non significant
Q08AM6	Q08AM6;Q08AM6-2	>SP|Q08AM6|VAC14_HUMAN Protein VAC14 homolog OS=Homo sapiens OX=9606 GN=VAC14 PE=1 SV=1;>SP|Q08AM6-2|VAC14_HUMAN Isoform 2 of Protein VAC14 homolog OS=Homo sapiens OX=9606 GN=VAC14	VAC14	2;1	2	13497	13888	72990	57385	26774	64478	16544	24787	11103	60343	0.644033	0.751783	-0.205039	TB-EOT	Non significant
Q09028-4	Q09028-4;Q09028-3;Q09028-2;Q16576;Q09028;Q16576-2	>SP|Q09028-4|RBBP4_HUMAN Isoform 4 of Histone-binding protein RBBP4 OS=Homo sapiens OX=9606 GN=RBBP4;>SP|Q09028-3|RBBP4_HUMAN Isoform 3 of Histone-binding protein RBBP4 OS=Homo sapiens OX=9606 GN=RBBP4;>SP|Q09028-2|RBBP4_HUMAN Isoform 2 of Histone-binding pro	RBBP4;RBBP7	2;2;2;2;2;2	6	7123.6	10319	69582	60603	59104	70166	14074	33943	58510	123080	0.77893	0.8548	0.11796	TB-EOT	Non significant
Q09666	Q09666	>SP|Q09666|AHNK_HUMAN Neuroblast differentiation-associated protein AHNAK OS=Homo sapiens OX=9606 GN=AHNAK PE=1 SV=2	AHNAK	62	1	5140300	5095800	16228000	4766500	4455900	18104000	2900900	4172600	6115900	16671000	0.0832542	0.199423	-0.631042	TB-EOT	Non significant
Q0VD83-3	Q0VD83-3;Q0VD83;Q0VD83-4;Q0VD83-2	>SP|Q0VD83-3|APOBR_HUMAN Isoform 3 of Apolipoprotein B receptor OS=Homo sapiens OX=9606 GN=APOBR;>SP|Q0VD83|APOBR_HUMAN Apolipoprotein B receptor OS=Homo sapiens OX=9606 GN=APOBR PE=1 SV=2;>SP|Q0VD83-4|APOBR_HUMAN Isoform 4 of Apolipoprotein B receptor OS=Hom	APOBR	14;14;14;5	4	1173700	376270	898980	365750	600350	1582700	72127	227280	732750	2136400	0.387543	0.539792	-0.580348	TB-EOT	Non significant
Q10567-3	Q10567-3;Q10567-2;Q10567;Q10567-4	>SP|Q10567-3|AP1B1_HUMAN Isoform C of AP-1 complex subunit beta-1 OS=Homo sapiens OX=9606 GN=AP1B1;>SP|Q10567-2|AP1B1_HUMAN Isoform B of AP-1 complex subunit beta-1 OS=Homo sapiens OX=9606 GN=AP1B1;>SP|Q10567|AP1B1_HUMAN AP-1 complex subunit beta-1 OS=Homo sa	AP1B1	7;7;7;6	4	168350	168280	1155500	485630	578790	733250	134570	252230	507790	1070300	0.573559	0.697907	-0.174595	TB-EOT	Non significant
Q10588	Q10588;Q10588-2	>SP|Q10588|BST1_HUMAN ADP-ribosyl cyclase/cyclic ADP-ribose hydrolase 2 OS=Homo sapiens OX=9606 GN=BST1 PE=1 SV=2;>SP|Q10588-2|BST1_HUMAN Isoform 2 of ADP-ribosyl cyclase/cyclic ADP-ribose hydrolase 2 OS=Homo sapiens OX=9606 GN=BST1	BST1	7;6	2	1095200	210030	408730	543110	997930	460160	166060	227440	559790	345750	0.032792	0.109331	1.35317	TB-EOT	Non significant
Q12765	Q12765;Q12765-2;Q12765-3	>SP|Q12765|SCRN1_HUMAN Secernin-1 OS=Homo sapiens OX=9606 GN=SCRN1 PE=1 SV=2;>SP|Q12765-2|SCRN1_HUMAN Isoform 2 of Secernin-1 OS=Homo sapiens OX=9606 GN=SCRN1;>SP|Q12765-3|SCRN1_HUMAN Isoform 3 of Secernin-1 OS=Homo sapiens OX=9606 GN=SCRN1	SCRN1	3;3;2	3	68185	43213	113440	199350	234380	206180	130600	199900	303630	143000	0.000188837	0.00541927	1.5009	TB-EOT	Upregulated
Q12792-4	Q12792-4;Q12792;Q12792-3	>SP|Q12792-4|TWF1_HUMAN Isoform 4 of Twinfilin-1 OS=Homo sapiens OX=9606 GN=TWF1;>SP|Q12792|TWF1_HUMAN Twinfilin-1 OS=Homo sapiens OX=9606 GN=TWF1 PE=1 SV=3;>SP|Q12792-3|TWF1_HUMAN Isoform 3 of Twinfilin-1 OS=Homo sapiens OX=9606 GN=TWF1	TWF1	4;4;3	3	10224	22724	69266	31746	31125	75333	37067	34619	32992	103290	0.481629	0.621339	-0.250485	TB-EOT	Non significant
Q12805-2	Q12805-2;Q12805-4;Q12805-3;Q12805;Q12805-5	>SP|Q12805-2|FBLN3_HUMAN Isoform 2 of EGF-containing fibulin-like extracellular matrix protein 1 OS=Homo sapiens OX=9606 GN=EFEMP1;>SP|Q12805-4|FBLN3_HUMAN Isoform 4 of EGF-containing fibulin-like extracellular matrix protein 1 OS=Homo sapiens OX=9606 GN=EFE	EFEMP1	14;14;14;14;11	5	1252600	687230	1941900	7324100	3361300	3311000	683550	2272900	1299200	1880000	0.0428593	0.13032	1.08708	TB-EOT	Non significant
Q12841-2	Q12841-2;Q12841	>SP|Q12841-2|FSTL1_HUMAN Isoform 2 of Follistatin-related protein 1 OS=Homo sapiens OX=9606 GN=FSTL1;>SP|Q12841|FSTL1_HUMAN Follistatin-related protein 1 OS=Homo sapiens OX=9606 GN=FSTL1 PE=1 SV=1	FSTL1	5;5	2	160690	119320	298570	242600	525530	394250	166650	179640	472250	363240	0.0192306	0.077176	0.80213	TB-EOT	Non significant
Q12860-2	Q12860-2;Q12860;Q12860-3	>SP|Q12860-2|CNTN1_HUMAN Isoform 2 of Contactin-1 OS=Homo sapiens OX=9606 GN=CNTN1;>SP|Q12860|CNTN1_HUMAN Contactin-1 OS=Homo sapiens OX=9606 GN=CNTN1 PE=1 SV=1;>SP|Q12860-3|CNTN1_HUMAN Isoform 3 of Contactin-1 OS=Homo sapiens OX=9606 GN=CNTN1	CNTN1	3;3;2	3	14144	14195	33969	88511	35538	50997	9782.5	14924	23051	34352	0.303739	0.467598	0.461602	TB-EOT	Non significant
Q12882	Q12882	>SP|Q12882|DPYD_HUMAN Dihydropyrimidine dehydrogenase [NADP(+)] OS=Homo sapiens OX=9606 GN=DPYD PE=1 SV=2	DPYD	3	1	3848.6	4468.3	60755	24639	22827	17412	27957	31073	19624	45687	0.279119	0.443615	0.616776	TB-EOT	Non significant
Q12906-5	Q12906-5;Q12906-4;Q12906-2;Q12906-6;Q12906-3;Q12906;Q12906-7	>SP|Q12906-5|ILF3_HUMAN Isoform 5 of Interleukin enhancer-binding factor 3 OS=Homo sapiens OX=9606 GN=ILF3;>SP|Q12906-4|ILF3_HUMAN Isoform 4 of Interleukin enhancer-binding factor 3 OS=Homo sapiens OX=9606 GN=ILF3;>SP|Q12906-2|ILF3_HUMAN Isoform 2 of Interleu	ILF3	2;2;2;2;2;2;2	7	4996.2	10516	19981	22694	19822	12197	10358	10969	38134	27410	0.088413	0.205621	0.701497	TB-EOT	Non significant
Q12907	Q12907	>SP|Q12907|LMAN2_HUMAN Vesicular integral-membrane protein VIP36 OS=Homo sapiens OX=9606 GN=LMAN2 PE=1 SV=1	LMAN2	2	1	51493	15411	54405	82920	62766	60895	17901	19123	76566	68828	0.0507838	0.144517	0.87278	TB-EOT	Non significant
Q12913	Q12913;Q12913-2	>SP|Q12913|PTPRJ_HUMAN Receptor-type tyrosine-protein phosphatase eta OS=Homo sapiens OX=9606 GN=PTPRJ PE=1 SV=3;>SP|Q12913-2|PTPRJ_HUMAN Isoform 2 of Receptor-type tyrosine-protein phosphatase eta OS=Homo sapiens OX=9606 GN=PTPRJ	PTPRJ	4;3	2	231230	67468	127740	183390	176310	233060	62194	67296	193910	145050	0.0738274	0.188409	0.905193	TB-EOT	Non significant
Q12929-2	Q12929-2;Q12929	>SP|Q12929-2|EPS8_HUMAN Isoform 2 of Epidermal growth factor receptor kinase substrate 8 OS=Homo sapiens OX=9606 GN=EPS8;>SP|Q12929|EPS8_HUMAN Epidermal growth factor receptor kinase substrate 8 OS=Homo sapiens OX=9606 GN=EPS8 PE=1 SV=1	EPS8	4;4	2	26340	35151	104640	111050	88866	155040	34743	52124	44020	118040	0.836426	0.896796	0.06798	TB-EOT	Non significant
Q13011	Q13011	>SP|Q13011|ECH1_HUMAN Delta(3,5)-Delta(2,4)-dienoyl-CoA isomerase, mitochondrial OS=Homo sapiens OX=9606 GN=ECH1 PE=1 SV=2	ECH1	3	1	121020	83376	198830	168590	121350	222980	104750	75340	62866	662970	0.612264	0.729822	-0.246973	TB-EOT	Non significant
Q13045-2	Q13045-2;Q13045-3;Q13045	>SP|Q13045-2|FLII_HUMAN Isoform 2 of Protein flightless-1 homolog OS=Homo sapiens OX=9606 GN=FLII;>SP|Q13045-3|FLII_HUMAN Isoform 3 of Protein flightless-1 homolog OS=Homo sapiens OX=9606 GN=FLII;>SP|Q13045|FLII_HUMAN Protein flightless-1 homolog OS=Homo sapi	FLII	10;10;10	3	53443	201910	547370	202130	202270	582160	79737	116940	114830	830660	0.00113056	0.0134342	-1.20376	TB-EOT	Downregulated
Q13098-5	Q13098-5;Q13098;Q13098-7;Q13098-6	>SP|Q13098-5|CSN1_HUMAN Isoform 4 of COP9 signalosome complex subunit 1 OS=Homo sapiens OX=9606 GN=GPS1;>SP|Q13098|CSN1_HUMAN COP9 signalosome complex subunit 1 OS=Homo sapiens OX=9606 GN=GPS1 PE=1 SV=4;>SP|Q13098-7|CSN1_HUMAN Isoform 2 of COP9 signalosome co	GPS1	5;5;5;2	4	35444	207280	332210	243740	105460	409550	125910	237710	334200	470870	0.417176	0.563953	-0.374588	TB-EOT	Non significant
Q13126-4	Q13126-4;Q13126;Q13126-3;Q13126-2;Q13126-7;Q13126-6;Q13126-5	>SP|Q13126-4|MTAP_HUMAN Isoform 4 of S-methyl-5-thioadenosine phosphorylase OS=Homo sapiens OX=9606 GN=MTAP;>SP|Q13126|MTAP_HUMAN S-methyl-5-thioadenosine phosphorylase OS=Homo sapiens OX=9606 GN=MTAP PE=1 SV=2;>SP|Q13126-3|MTAP_HUMAN Isoform 3 of S-methyl-	MTAP	6;6;6;6;5;5;5	7	106240	182680	657630	323330	272250	905100	229010	195170	299060	1262500	0.0632896	0.168762	-0.587401	TB-EOT	Non significant
Q13162	Q13162	>SP|Q13162|PRDX4_HUMAN Peroxiredoxin-4 OS=Homo sapiens OX=9606 GN=PRDX4 PE=1 SV=1	PRDX4	2	1	7854.7	5088.1	18339	14456	7197.4	10062	11383	12876	38708	10686	0.0163279	0.0712603	1.225	TB-EOT	Non significant
Q13177	Q13177;O75914-2;O75914;O75914-4;O75914-3	>SP|Q13177|PAK2_HUMAN Serine/threonine-protein kinase PAK 2 OS=Homo sapiens OX=9606 GN=PAK2 PE=1 SV=3	PAK2	8;1;1;1;1	5	141100	271100	1575400	497530	731520	1901700	141510	383360	257150	2200600	0.0112296	0.055636	-1.09326	TB-EOT	Non significant
Q13200-2	Q13200-2;Q13200-3;Q13200	>SP|Q13200-2|PSMD2_HUMAN Isoform 2 of 26S proteasome non-ATPase regulatory subunit 2 OS=Homo sapiens OX=9606 GN=PSMD2;>SP|Q13200-3|PSMD2_HUMAN Isoform 3 of 26S proteasome non-ATPase regulatory subunit 2 OS=Homo sapiens OX=9606 GN=PSMD2;>SP|Q13200|PSMD2_HUMAN	PSMD2	7;7;7	3	41578	184000	798800	239870	315610	646230	65604	182440	285800	790830	0.0164915	0.0712603	-0.959464	TB-EOT	Non significant
Q13228	Q13228;Q13228-4;Q13228-3;Q13228-2	>SP|Q13228|SBP1_HUMAN Methanethiol oxidase OS=Homo sapiens OX=9606 GN=SELENBP1 PE=1 SV=2;>SP|Q13228-4|SBP1_HUMAN Isoform 4 of Methanethiol oxidase OS=Homo sapiens OX=9606 GN=SELENBP1;>SP|Q13228-3|SBP1_HUMAN Isoform 3 of Methanethiol oxidase OS=Homo sapiens OX	SELENBP1	22;22;19;18	4	2296900	1581500	5554400	10137000	4787300	7766600	7503600	5710200	8633700	6205300	0.00441001	0.0309446	1.23118	TB-EOT	Upregulated
Q13231-3	Q13231-3;Q13231;Q13231-4;Q13231-2	>SP|Q13231-3|CHIT1_HUMAN Isoform 3 of Chitotriosidase-1 OS=Homo sapiens OX=9606 GN=CHIT1;>SP|Q13231|CHIT1_HUMAN Chitotriosidase-1 OS=Homo sapiens OX=9606 GN=CHIT1 PE=1 SV=1;>SP|Q13231-4|CHIT1_HUMAN Isoform 4 of Chitotriosidase-1 OS=Homo sapiens OX=9606 GN=CHI	CHIT1	20;20;18;16	4	118260	132570	6321000	3372500	6681500	8417000	159620	1466400	1684300	1188000	0.920483	0.949833	0.102502	TB-EOT	Non significant
Q13263-2	Q13263-2;Q13263	>SP|Q13263-2|TIF1B_HUMAN Isoform 2 of Transcription intermediary factor 1-beta OS=Homo sapiens OX=9606 GN=TRIM28;>SP|Q13263|TIF1B_HUMAN Transcription intermediary factor 1-beta OS=Homo sapiens OX=9606 GN=TRIM28 PE=1 SV=5	TRIM28	2;2	2	1835.6	15057	60211	19415	14539	59183	13291	12978	21778	86021	0.0186112	0.0769231	-1.1951	TB-EOT	Non significant
Q13287	Q13287	>SP|Q13287|NMI_HUMAN N-myc-interactor OS=Homo sapiens OX=9606 GN=NMI PE=1 SV=2	NMI	2	1	17582	16943	26439	17346	25478	30189	12914	17403	33614	41896	0.285304	0.447391	0.380513	TB-EOT	Non significant
Q13404	Q13404;Q13404-7;Q13404-2;Q13404-1;Q13404-8;Q15819;Q13404-6	>SP|Q13404|UB2V1_HUMAN Ubiquitin-conjugating enzyme E2 variant 1 OS=Homo sapiens OX=9606 GN=UBE2V1 PE=1 SV=2;>SP|Q13404-7|UB2V1_HUMAN Isoform 5 of Ubiquitin-conjugating enzyme E2 variant 1 OS=Homo sapiens OX=9606 GN=UBE2V1;>SP|Q13404-2|UB2V1_HUMAN Isoform 2 o	UBE2V1;UBE2V2	6;6;6;6;5;5;3	7	148680	183960	475040	426100	340030	677540	444970	279750	327370	747970	0.417201	0.563953	0.289303	TB-EOT	Non significant
Q13421-4	Q13421-4;Q13421-3;Q13421-2;Q13421	>SP|Q13421-4|MSLN_HUMAN Isoform 4 of Mesothelin OS=Homo sapiens OX=9606 GN=MSLN;>SP|Q13421-3|MSLN_HUMAN Isoform 2 of Mesothelin OS=Homo sapiens OX=9606 GN=MSLN;>SP|Q13421-2|MSLN_HUMAN Isoform 3 of Mesothelin OS=Homo sapiens OX=9606 GN=MSLN;>SP|Q13421|MSLN_HUMA	MSLN	15;15;15;14	4	1957000	794740	2972000	2950200	3704700	3740000	431100	1319300	5971400	962120	0.0690105	0.178816	1.11598	TB-EOT	Non significant
Q13451	Q13451;Q13451-2	>SP|Q13451|FKBP5_HUMAN Peptidyl-prolyl cis-trans isomerase FKBP5 OS=Homo sapiens OX=9606 GN=FKBP5 PE=1 SV=2	FKBP5	7;3	2	99157	237730	911700	342780	416500	1123600	190840	264140	242130	1923500	0.00888623	0.0489582	-0.952248	TB-EOT	Non significant
Q13492-4	Q13492-4;Q13492-3;Q13492-2;Q13492-5;Q13492;O60641-3;O60641-4;O60641	>SP|Q13492-4|PICAL_HUMAN Isoform 4 of Phosphatidylinositol-binding clathrin assembly protein OS=Homo sapiens OX=9606 GN=PICALM;>SP|Q13492-3|PICAL_HUMAN Isoform 3 of Phosphatidylinositol-binding clathrin assembly protein OS=Homo sapiens OX=9606 GN=PICALM;>SP|Q	PICALM	3;3;3;3;3;1;1;1	8	8159.4	12346	46102	9067.1	20847	46382	3832	6364.5	13914	73123	0.00443519	0.0309446	-1.19653	TB-EOT	Downregulated
Q13510	Q13510;Q13510-2;Q13510-3	>SP|Q13510|ASAH1_HUMAN Acid ceramidase OS=Homo sapiens OX=9606 GN=ASAH1 PE=1 SV=5;>SP|Q13510-2|ASAH1_HUMAN Isoform 2 of Acid ceramidase OS=Homo sapiens OX=9606 GN=ASAH1;>SP|Q13510-3|ASAH1_HUMAN Isoform 3 of Acid ceramidase OS=Homo sapiens OX=9606 GN=ASAH1	ASAH1	15;15;11	3	1905500	2200100	3567100	1881100	1769800	7277900	444820	843170	1448000	23127000	0.0163698	0.0712603	-1.43706	TB-EOT	Non significant
Q13555-10	Q13555-10;Q13555-3;Q13555-5;Q13555-4;Q13555-7;Q13555-11;Q13555-9;Q13555-2;Q13555-8;Q13555;Q13555-6;Q13554-7;Q9UQM7;Q13557-8;Q13557-12;Q13554-4;Q9UQM7-2;Q13557-9;Q13557-10;Q13554-6;Q13557-5;Q13557;Q13554-3;Q13557-3;Q13557-6;Q13554-8;Q13554-5;Q13557-4;Q13557-11;Q13554-2;Q13554	>SP|Q13555-10|KCC2G_HUMAN Isoform 10 of Calcium/calmodulin-dependent protein kinase type II subunit gamma OS=Homo sapiens OX=9606 GN=CAMK2G;>SP|Q13555-3|KCC2G_HUMAN Isoform 3 of Calcium/calmodulin-dependent protein kinase type II subunit gamma OS=Homo sapien	CAMK2G;CAMK2B;CAMK2A;CAMK2D	2;2;2;2;2;2;2;2;2;2;2;1;1;1;1;1;1;1;1;1;1;1;1;1;1;1;1;1;1;1;1	31	4575	37988	104920	35490	32136	134450	20204	37410	39718	141420	0.0128273	0.0605909	-1.14935	TB-EOT	Non significant
Q13561	Q13561;Q13561-3;Q13561-2	>SP|Q13561|DCTN2_HUMAN Dynactin subunit 2 OS=Homo sapiens OX=9606 GN=DCTN2 PE=1 SV=4;>SP|Q13561-3|DCTN2_HUMAN Isoform 3 of Dynactin subunit 2 OS=Homo sapiens OX=9606 GN=DCTN2;>SP|Q13561-2|DCTN2_HUMAN Isoform 2 of Dynactin subunit 2 OS=Homo sapiens OX=9606 GN=	DCTN2	9;9;9	3	159310	101420	739980	335940	460130	613550	151570	226520	551150	927070	0.623397	0.736865	0.150283	TB-EOT	Non significant
Q13564-3	Q13564-3;Q13564-2;Q13564;Q13564-4	>SP|Q13564-3|ULA1_HUMAN Isoform 3 of NEDD8-activating enzyme E1 regulatory subunit OS=Homo sapiens OX=9606 GN=NAE1;>SP|Q13564-2|ULA1_HUMAN Isoform 2 of NEDD8-activating enzyme E1 regulatory subunit OS=Homo sapiens OX=9606 GN=NAE1;>SP|Q13564|ULA1_HUMAN NEDD8-a	NAE1	6;6;6;6	4	28240	47097	269680	150260	124820	379970	124350	124940	116480	362830	0.638367	0.747121	-0.18538	TB-EOT	Non significant
Q13576	Q13576;Q13576-3;Q13576-2	>SP|Q13576|IQGA2_HUMAN Ras GTPase-activating-like protein IQGAP2 OS=Homo sapiens OX=9606 GN=IQGAP2 PE=1 SV=4;>SP|Q13576-3|IQGA2_HUMAN Isoform 3 of Ras GTPase-activating-like protein IQGAP2 OS=Homo sapiens OX=9606 GN=IQGAP2;>SP|Q13576-2|IQGA2_HUMAN Isoform 2 o	IQGAP2	9;7;7	3	65284	288280	1124600	220130	276630	851230	94173	156890	130290	1673700	0.000125696	0.0047796	-1.69666	TB-EOT	Downregulated
Q13596-2	Q13596-2;Q13596;Q13596-3	>SP|Q13596-2|SNX1_HUMAN Isoform 1A of Sorting nexin-1 OS=Homo sapiens OX=9606 GN=SNX1;>SP|Q13596|SNX1_HUMAN Sorting nexin-1 OS=Homo sapiens OX=9606 GN=SNX1 PE=1 SV=3;>SP|Q13596-3|SNX1_HUMAN Isoform 3 of Sorting nexin-1 OS=Homo sapiens OX=9606 GN=SNX1	SNX1	4;4;4	3	14220	28904	165200	51120	52905	130070	20285	58428	57941	131320	0.12848	0.264847	-0.496586	TB-EOT	Non significant
Q13630	Q13630	>SP|Q13630|FCL_HUMAN GDP-L-fucose synthase OS=Homo sapiens OX=9606 GN=TSTA3 PE=1 SV=1	TSTA3	4	1	50678	40318	437970	171390	213230	203280	114510	158150	287300	323410	0.170366	0.318667	0.517798	TB-EOT	Non significant
Q13642-1	Q13642-1;Q13642-5;Q13642-4;Q13642-3;Q13642	>SP|Q13642-1|FHL1_HUMAN Isoform 1 of Four and a half LIM domains protein 1 OS=Homo sapiens OX=9606 GN=FHL1;>SP|Q13642-5|FHL1_HUMAN Isoform 5 of Four and a half LIM domains protein 1 OS=Homo sapiens OX=9606 GN=FHL1;>SP|Q13642-4|FHL1_HUMAN Isoform 4 of Four and	FHL1	2;2;2;1;1	5	6296.6	98730	173710	138120	32605	137490	270070	386500	11728	248270	0.600841	0.721864	-0.588084	TB-EOT	Non significant
Q13740-2	Q13740-2;Q13740;Q13740-3;Q13740-4	>SP|Q13740-2|CD166_HUMAN Isoform 2 of CD166 antigen OS=Homo sapiens OX=9606 GN=ALCAM;>SP|Q13740|CD166_HUMAN CD166 antigen OS=Homo sapiens OX=9606 GN=ALCAM PE=1 SV=2	ALCAM	10;10;3;3	4	1186300	372760	1549400	1457500	1298500	2526300	823950	614210	5486000	1430400	0.0432166	0.130422	1.03198	TB-EOT	Non significant
Q13765	Q13765;E9PAV3-2;E9PAV3;Q9BZK3;Q9H009	>SP|Q13765|NACA_HUMAN Nascent polypeptide-associated complex subunit alpha OS=Homo sapiens OX=9606 GN=NACA PE=1 SV=1;>SP|E9PAV3-2|NACAM_HUMAN Isoform skNAC-2 of Nascent polypeptide-associated complex subunit alpha, muscle-specific form OS=Homo sapiens OX=960	NACA	4;4;4;1;1	5	42068	19331	310740	108400	116340	286340	55150	64210	242670	315150	0.894416	0.931785	0.0588645	TB-EOT	Non significant
Q13790	Q13790	>SP|Q13790|APOF_HUMAN Apolipoprotein F OS=Homo sapiens OX=9606 GN=APOF PE=1 SV=2	APOF	2	1	5227.3	7431.6	12837	11789	13481	5891.6	8248.7	30139	19343	7143	0.0106438	0.0545092	1.51953	TB-EOT	Non significant
Q13813	Q13813;Q13813-2;Q13813-3;REV__Q04637-7;REV__Q04637-8	>SP|Q13813|SPTN1_HUMAN Spectrin alpha chain, non-erythrocytic 1 OS=Homo sapiens OX=9606 GN=SPTAN1 PE=1 SV=3;>SP|Q13813-2|SPTN1_HUMAN Isoform 2 of Spectrin alpha chain, non-erythrocytic 1 OS=Homo sapiens OX=9606 GN=SPTAN1;>SP|Q13813-3|SPTN1_HUMAN Isoform 3 of	SPTAN1	27;27;26;0;0	5	998980	145500	951740	665110	1980000	683710	328340	496700	1806400	550410	0.00257378	0.0217484	1.69499	TB-EOT	Upregulated
Q13838	Q13838;Q13838-2;O00148;O00148-3;O00148-2	>SP|Q13838|DX39B_HUMAN Spliceosome RNA helicase DDX39B OS=Homo sapiens OX=9606 GN=DDX39B PE=1 SV=1;>SP|Q13838-2|DX39B_HUMAN Isoform 2 of Spliceosome RNA helicase DDX39B OS=Homo sapiens OX=9606 GN=DDX39B;>SP|O00148|DX39A_HUMAN ATP-dependent RNA helicase DDX39A	DDX39B;DDX39A	7;7;5;3;3	5	31833	177220	659580	241080	334960	987060	307540	249640	631290	1221400	0.264824	0.427234	-0.597656	TB-EOT	Non significant
Q13867	Q13867	>SP|Q13867|BLMH_HUMAN Bleomycin hydrolase OS=Homo sapiens OX=9606 GN=BLMH PE=1 SV=1	BLMH	8	1	96041	301680	1656400	912870	695880	1111000	1024200	586180	253390	1557900	0.713215	0.805345	-0.21555	TB-EOT	Non significant
Q13907	Q13907;Q13907-2	>SP|Q13907|IDI1_HUMAN Isopentenyl-diphosphate Delta-isomerase 1 OS=Homo sapiens OX=9606 GN=IDI1 PE=1 SV=2;>SP|Q13907-2|IDI1_HUMAN Isoform 2 of Isopentenyl-diphosphate Delta-isomerase 1 OS=Homo sapiens OX=9606 GN=IDI1	IDI1	5;5	2	25016	47377	183100	63791	95816	360670	80998	46763	110900	315770	0.101381	0.226766	-0.628874	TB-EOT	Non significant
Q13938-4	Q13938-4;Q13938;Q13938-3	>SP|Q13938-4|CAYP1_HUMAN Isoform 3 of Calcyphosin OS=Homo sapiens OX=9606 GN=CAPS;>SP|Q13938|CAYP1_HUMAN Calcyphosin OS=Homo sapiens OX=9606 GN=CAPS PE=1 SV=2;>SP|Q13938-3|CAYP1_HUMAN Isoform 2 of Calcyphosin OS=Homo sapiens OX=9606 GN=CAPS	CAPS	10;9;7	3	12985000	1647900	2875000	5946200	2148100	18173000	3380000	2471400	7211900	5555600	0.244902	0.404008	0.846304	TB-EOT	Non significant
Q14019	Q14019	>SP|Q14019|COTL1_HUMAN Coactosin-like protein OS=Homo sapiens OX=9606 GN=COTL1 PE=1 SV=3	COTL1	8	1	1535800	1950800	9625300	2703000	3863100	10023000	969060	1281000	928620	23622000	0.00722257	0.0429473	-1.4708	TB-EOT	Downregulated
Q14108	Q14108;Q14108-2	>SP|Q14108|SCRB2_HUMAN Lysosome membrane protein 2 OS=Homo sapiens OX=9606 GN=SCARB2 PE=1 SV=2;>SP|Q14108-2|SCRB2_HUMAN Isoform 2 of Lysosome membrane protein 2 OS=Homo sapiens OX=9606 GN=SCARB2	SCARB2	2;1	2	23110	18372	23232	37584	16414	39595	8535.1	9065.1	23280	54578	0.989807	0.993385	0.00595274	TB-EOT	Non significant
Q14116-2	Q14116-2;Q14116	>SP|Q14116-2|IL18_HUMAN Isoform 2 of Interleukin-18 OS=Homo sapiens OX=9606 GN=IL18;>SP|Q14116|IL18_HUMAN Interleukin-18 OS=Homo sapiens OX=9606 GN=IL18 PE=1 SV=1	IL18	6;6	2	125630	99671	424530	362990	256350	501960	150090	159240	260410	614930	0.633197	0.743231	0.13091	TB-EOT	Non significant
Q14118	Q14118	>SP|Q14118|DAG1_HUMAN Dystroglycan OS=Homo sapiens OX=9606 GN=DAG1 PE=1 SV=2	DAG1	3	1	31257	18789	40920	88172	46058	43977	13216	24107	92910	51571	0.0280215	0.0999752	0.975099	TB-EOT	Non significant
Q14139	Q14139;Q14139-2	>SP|Q14139|UBE4A_HUMAN Ubiquitin conjugation factor E4 A OS=Homo sapiens OX=9606 GN=UBE4A PE=1 SV=2;>SP|Q14139-2|UBE4A_HUMAN Isoform 2 of Ubiquitin conjugation factor E4 A OS=Homo sapiens OX=9606 GN=UBE4A	UBE4A	3;3	2	6440.3	11297	57060	30124	19614	52257	13822	21222	17974	67202	0.243361	0.402339	-0.377218	TB-EOT	Non significant
Q14152	Q14152;Q14152-2	>SP|Q14152|EIF3A_HUMAN Eukaryotic translation initiation factor 3 subunit A OS=Homo sapiens OX=9606 GN=EIF3A PE=1 SV=1;>SP|Q14152-2|EIF3A_HUMAN Isoform 2 of Eukaryotic translation initiation factor 3 subunit A OS=Homo sapiens OX=9606 GN=EIF3A	EIF3A	7;6	2	35949	36297	94478	43698	47905	126940	19413	46781	88729	150210	0.499659	0.634905	-0.217016	TB-EOT	Non significant
Q14166	Q14166	>SP|Q14166|TTL12_HUMAN Tubulin--tyrosine ligase-like protein 12 OS=Homo sapiens OX=9606 GN=TTLL12 PE=1 SV=2	TTLL12	3	1	4723.1	17118	82466	38412	42126	85801	16644	36164	34409	116770	0.191524	0.34495	-0.541394	TB-EOT	Non significant
Q14203-5	Q14203-5;Q14203-2;Q14203-3;Q14203-4;Q14203-6;Q14203	>SP|Q14203-5|DCTN1_HUMAN Isoform 5 of Dynactin subunit 1 OS=Homo sapiens OX=9606 GN=DCTN1;>SP|Q14203-2|DCTN1_HUMAN Isoform p135 of Dynactin subunit 1 OS=Homo sapiens OX=9606 GN=DCTN1;>SP|Q14203-3|DCTN1_HUMAN Isoform 3 of Dynactin subunit 1 OS=Homo sapiens OX=	DCTN1	3;3;3;3;3;3	6	15411	7505.6	39514	15551	37255	37763	8589.6	14341	20579	52704	0.694376	0.791072	0.136588	TB-EOT	Non significant
Q14204	Q14204	>SP|Q14204|DYHC1_HUMAN Cytoplasmic dynein 1 heavy chain 1 OS=Homo sapiens OX=9606 GN=DYNC1H1 PE=1 SV=5	DYNC1H1	37	1	159060	545300	1740900	546500	851170	1867800	286780	479360	537550	1984800	0.0100193	0.0527311	-0.848955	TB-EOT	Non significant
Q14232-2	Q14232-2;Q14232	>SP|Q14232-2|EI2BA_HUMAN Isoform 2 of Translation initiation factor eIF-2B subunit alpha OS=Homo sapiens OX=9606 GN=EIF2B1;>SP|Q14232|EI2BA_HUMAN Translation initiation factor eIF-2B subunit alpha OS=Homo sapiens OX=9606 GN=EIF2B1 PE=1 SV=1	EIF2B1	2;2	2	6853.8	16798	86439	28337	21983	125870	19481	18263	31286	135400	0.00725671	0.0429473	-1.03247	TB-EOT	Downregulated
Q14247-3	Q14247-3;Q14247;Q14247-2	>SP|Q14247-3|SRC8_HUMAN Isoform 3 of Src substrate cortactin OS=Homo sapiens OX=9606 GN=CTTN;>SP|Q14247|SRC8_HUMAN Src substrate cortactin OS=Homo sapiens OX=9606 GN=CTTN PE=1 SV=2;>SP|Q14247-2|SRC8_HUMAN Isoform 2 of Src substrate cortactin OS=Homo sapiens O	CTTN	5;5;5	3	36785	36383	193810	130430	68183	194890	55770	82170	138570	109160	0.326099	0.487226	0.33321	TB-EOT	Non significant
Q14258	Q14258	>SP|Q14258|TRI25_HUMAN E3 ubiquitin/ISG15 ligase TRIM25 OS=Homo sapiens OX=9606 GN=TRIM25 PE=1 SV=2	TRIM25	6	1	146530	322590	945980	183610	248340	677400	142980	210400	259250	1030000	0.00743944	0.043354	-0.956102	TB-EOT	Non significant
Q14376	Q14376;Q14376-2	>SP|Q14376|GALE_HUMAN UDP-glucose 4-epimerase OS=Homo sapiens OX=9606 GN=GALE PE=1 SV=2;>SP|Q14376-2|GALE_HUMAN Isoform 2 of UDP-glucose 4-epimerase OS=Homo sapiens OX=9606 GN=GALE	GALE	5;4	2	74276	127270	623010	219870	250790	294710	170300	191250	605160	402030	0.4653	0.605926	0.274735	TB-EOT	Non significant
Q14444-2	Q14444-2;Q14444	>SP|Q14444-2|CAPR1_HUMAN Isoform 2 of Caprin-1 OS=Homo sapiens OX=9606 GN=CAPRIN1;>SP|Q14444|CAPR1_HUMAN Caprin-1 OS=Homo sapiens OX=9606 GN=CAPRIN1 PE=1 SV=2	CAPRIN1	3;3	2	58343	20511	181290	37308	57004	145540	22936	30214	180920	170960	0.813514	0.880573	-0.115673	TB-EOT	Non significant
Q14508	Q14508;Q14508-2;Q14508-3	>SP|Q14508|WFDC2_HUMAN WAP four-disulfide core domain protein 2 OS=Homo sapiens OX=9606 GN=WFDC2 PE=1 SV=2;>SP|Q14508-2|WFDC2_HUMAN Isoform 2 of WAP four-disulfide core domain protein 2 OS=Homo sapiens OX=9606 GN=WFDC2;>SP|Q14508-3|WFDC2_HUMAN Isoform 3 of WA	WFDC2	4;3;3	3	8162200	190770	4232300	2232700	3616000	4515700	877490	328410	24611000	1380400	0.108394	0.237851	1.75257	TB-EOT	Non significant
Q14515	Q14515;Q14515-2	>SP|Q14515|SPRL1_HUMAN SPARC-like protein 1 OS=Homo sapiens OX=9606 GN=SPARCL1 PE=1 SV=2;>SP|Q14515-2|SPRL1_HUMAN Isoform 2 of SPARC-like protein 1 OS=Homo sapiens OX=9606 GN=SPARCL1	SPARCL1	5;3	2	136330	51031	85353	174520	48813	98592	37985	122030	184470	115820	0.0477219	0.138786	1.10758	TB-EOT	Non significant
Q14520-2	Q14520-2;Q14520	>SP|Q14520-2|HABP2_HUMAN Isoform 2 of Hyaluronan-binding protein 2 OS=Homo sapiens OX=9606 GN=HABP2;>SP|Q14520|HABP2_HUMAN Hyaluronan-binding protein 2 OS=Homo sapiens OX=9606 GN=HABP2 PE=1 SV=1	HABP2	7;7	2	118990	968610	1043400	3020900	1147700	326330	592830	2128400	1011300	317400	0.0803864	0.196572	1.51705	TB-EOT	Non significant
Q14624	Q14624;Q14624-3;Q14624-2;Q14624-4;CON__Q3T052	>SP|Q14624|ITIH4_HUMAN Inter-alpha-trypsin inhibitor heavy chain H4 OS=Homo sapiens OX=9606 GN=ITIH4 PE=1 SV=4;>SP|Q14624-3|ITIH4_HUMAN Isoform 3 of Inter-alpha-trypsin inhibitor heavy chain H4 OS=Homo sapiens OX=9606 GN=ITIH4;>SP|Q14624-2|ITIH4_HUMAN Isoform	ITIH4	26;24;24;23;1	5	823110	1863700	5195600	8345200	14362000	1807600	5957700	17632000	10610000	2534100	0.00353457	0.0262248	2.28068	TB-EOT	Upregulated
Q14651	Q14651	>SP|Q14651|PLSI_HUMAN Plastin-1 OS=Homo sapiens OX=9606 GN=PLS1 PE=1 SV=2	PLS1	4	1	74669	66309	224660	232480	209540	351730	140520	147310	219580	294880	0.060673	0.16568	0.544491	TB-EOT	Non significant
Q14677-2	Q14677-2;Q14677;Q14677-3	>SP|Q14677-2|EPN4_HUMAN Isoform 2 of Clathrin interactor 1 OS=Homo sapiens OX=9606 GN=CLINT1;>SP|Q14677|EPN4_HUMAN Clathrin interactor 1 OS=Homo sapiens OX=9606 GN=CLINT1 PE=1 SV=1;>SP|Q14677-3|EPN4_HUMAN Isoform 3 of Clathrin interactor 1 OS=Homo sapiens OX=	CLINT1	4;4;4	3	59886	192600	268980	146050	115730	343810	106350	154700	311020	422790	0.412323	0.561453	-0.305849	TB-EOT	Non significant
Q14697	Q14697;Q14697-2	>SP|Q14697|GANAB_HUMAN Neutral alpha-glucosidase AB OS=Homo sapiens OX=9606 GN=GANAB PE=1 SV=3;>SP|Q14697-2|GANAB_HUMAN Isoform 2 of Neutral alpha-glucosidase AB OS=Homo sapiens OX=9606 GN=GANAB	GANAB	7;7	2	49710	93548	349410	149950	184570	215410	96081	115670	278380	292590	0.706376	0.800595	0.114455	TB-EOT	Non significant
Q14764	Q14764	>SP|Q14764|MVP_HUMAN Major vault protein OS=Homo sapiens OX=9606 GN=MVP PE=1 SV=4	MVP	15	1	196010	227370	1504800	489770	613410	1349200	361440	591790	741350	2332900	0.368466	0.524753	-0.293164	TB-EOT	Non significant
Q14766-3	Q14766-3;Q14766-2;Q14766-5;Q14766;Q14766-4	>SP|Q14766-3|LTBP1_HUMAN Isoform 3 of Latent-transforming growth factor beta-binding protein 1 OS=Homo sapiens OX=9606 GN=LTBP1;>SP|Q14766-2|LTBP1_HUMAN Isoform Short of Latent-transforming growth factor beta-binding protein 1 OS=Homo sapiens OX=9606 GN=LTBP	LTBP1	2;2;2;2;2	5	88765	4000.4	11162	12794	28679	7574.6	22428	34237	20834	10317	0.00128604	0.0148186	2.74129	TB-EOT	Upregulated
Q14847	Q14847;Q14847-2;Q14847-3	>SP|Q14847|LASP1_HUMAN LIM and SH3 domain protein 1 OS=Homo sapiens OX=9606 GN=LASP1 PE=1 SV=2;>SP|Q14847-2|LASP1_HUMAN Isoform 2 of LIM and SH3 domain protein 1 OS=Homo sapiens OX=9606 GN=LASP1;>SP|Q14847-3|LASP1_HUMAN Isoform 3 of LIM and SH3 domain protein	LASP1	10;9;7	3	543520	1212300	6933200	1574400	606920	4954600	1411100	1162200	708260	8069800	0.0107793	0.054651	-1.36233	TB-EOT	Non significant
Q14894	Q14894	>SP|Q14894|CRYM_HUMAN Ketimine reductase mu-crystallin OS=Homo sapiens OX=9606 GN=CRYM PE=1 SV=1	CRYM	2	1	3266.5	6145	38597	21679	29761	25201	10309	12386	102540	21988	0.203547	0.355982	0.726015	TB-EOT	Non significant
Q14956-2	Q14956-2;Q14956	>SP|Q14956-2|GPNMB_HUMAN Isoform 2 of Transmembrane glycoprotein NMB OS=Homo sapiens OX=9606 GN=GPNMB;>SP|Q14956|GPNMB_HUMAN Transmembrane glycoprotein NMB OS=Homo sapiens OX=9606 GN=GPNMB PE=1 SV=2	GPNMB	2;2	2	8012.5	4655.3	10044	10166	10809	20912	3834	8237.5	6236.6	12427	0.354373	0.513335	0.365798	TB-EOT	Non significant
Q14974	Q14974;Q14974-2	>SP|Q14974|IMB1_HUMAN Importin subunit beta-1 OS=Homo sapiens OX=9606 GN=KPNB1 PE=1 SV=2;>SP|Q14974-2|IMB1_HUMAN Isoform 2 of Importin subunit beta-1 OS=Homo sapiens OX=9606 GN=KPNB1	KPNB1	11;10	2	59343	158820	1110800	572020	576830	1181500	79760	213090	268360	1622900	0.0461267	0.136496	-0.993524	TB-EOT	Non significant
Q15008	Q15008;Q15008-4;Q15008-3;Q15008-2	>SP|Q15008|PSMD6_HUMAN 26S proteasome non-ATPase regulatory subunit 6 OS=Homo sapiens OX=9606 GN=PSMD6 PE=1 SV=1;>SP|Q15008-4|PSMD6_HUMAN Isoform 4 of 26S proteasome non-ATPase regulatory subunit 6 OS=Homo sapiens OX=9606 GN=PSMD6;>SP|Q15008-3|PSMD6_HUMAN Iso	PSMD6	7;7;6;6	4	131900	389370	1256000	393380	459580	1290900	295400	349810	306820	1464000	0.0136517	0.063499	-0.842448	TB-EOT	Non significant
Q15018	Q15018	>SP|Q15018|ABRX2_HUMAN BRISC complex subunit Abraxas 2 OS=Homo sapiens OX=9606 GN=ABRAXAS2 PE=1 SV=2	FAM175B	2	1	4204.9	8926.2	23210	15566	9339.1	28376	9583.9	12265	11931	28746	0.532914	0.663134	-0.199404	TB-EOT	Non significant
Q15019	Q15019;Q15019-2;Q15019-3	>SP|Q15019|SEPT2_HUMAN Septin-2 OS=Homo sapiens OX=9606 GN=SEPT2 PE=1 SV=1;>SP|Q15019-2|SEPT2_HUMAN Isoform 2 of Septin-2 OS=Homo sapiens OX=9606 GN=SEPT2;>SP|Q15019-3|SEPT2_HUMAN Isoform 3 of Septin-2 OS=Homo sapiens OX=9606 GN=SEPT2		7;7;6	3	41270	380940	1409600	399310	278390	1466800	287760	347730	296630	2654900	0.00488334	0.0330114	-1.5491	TB-EOT	Downregulated
Q15046	Q15046;Q15046-2	>SP|Q15046|SYK_HUMAN Lysine--tRNA ligase OS=Homo sapiens OX=9606 GN=KARS PE=1 SV=3;>SP|Q15046-2|SYK_HUMAN Isoform Mitochondrial of Lysine--tRNA ligase OS=Homo sapiens OX=9606 GN=KARS	KARS	3;3	2	62433	48685	203710	32983	113260	136600	45565	45751	141470	206160	0.711882	0.805035	-0.156737	TB-EOT	Non significant
Q15056-2	Q15056-2;Q15056	>SP|Q15056-2|IF4H_HUMAN Isoform Short of Eukaryotic translation initiation factor 4H OS=Homo sapiens OX=9606 GN=EIF4H;>SP|Q15056|IF4H_HUMAN Eukaryotic translation initiation factor 4H OS=Homo sapiens OX=9606 GN=EIF4H PE=1 SV=5	EIF4H	5;5	2	59237	123290	423330	180180	121810	373790	127630	138640	170190	393810	0.223573	0.379525	-0.380362	TB-EOT	Non significant
Q15057	Q15057	>SP|Q15057|ACAP2_HUMAN Arf-GAP with coiled-coil, ANK repeat and PH domain-containing protein 2 OS=Homo sapiens OX=9606 GN=ACAP2 PE=1 SV=3	ACAP2	2	1	7353.2	12198	46979	17629	23629	55944	7194.4	16733	35249	74471	0.102591	0.228799	-0.500788	TB-EOT	Non significant
Q15063-3	Q15063-3;Q15063-5;Q15063-7;Q15063-6;Q15063-4;Q15063-2;Q15063	>SP|Q15063-3|POSTN_HUMAN Isoform 3 of Periostin OS=Homo sapiens OX=9606 GN=POSTN;>SP|Q15063-5|POSTN_HUMAN Isoform 5 of Periostin OS=Homo sapiens OX=9606 GN=POSTN;>SP|Q15063-7|POSTN_HUMAN Isoform 7 of Periostin OS=Homo sapiens OX=9606 GN=POSTN;>SP|Q15063-6|POST	POSTN	4;4;3;3;3;3;3	7	21659	5074.6	34101	14921	39194	22521	16636	120100	11841	17693	0.0382573	0.119485	1.53214	TB-EOT	Non significant
Q15075	Q15075	>SP|Q15075|EEA1_HUMAN Early endosome antigen 1 OS=Homo sapiens OX=9606 GN=EEA1 PE=1 SV=2	EEA1	8	1	170700	42737	208520	98716	155080	353690	50133	81247	80200	357210	0.909758	0.94211	-0.0539499	TB-EOT	Non significant
Q15080	Q15080;Q15080-3	>SP|Q15080|NCF4_HUMAN Neutrophil cytosol factor 4 OS=Homo sapiens OX=9606 GN=NCF4 PE=1 SV=2;>SP|Q15080-3|NCF4_HUMAN Isoform 3 of Neutrophil cytosol factor 4 OS=Homo sapiens OX=9606 GN=NCF4	NCF4	3;2	2	6655.2	11723	43309	13297	16152	37302	5289.1	8330	22153	57717	0.0156055	0.069	-0.75566	TB-EOT	Non significant
Q15084-3	Q15084-3;Q15084;Q15084-4;Q15084-5;Q15084-2	>SP|Q15084-3|PDIA6_HUMAN Isoform 3 of Protein disulfide-isomerase A6 OS=Homo sapiens OX=9606 GN=PDIA6;>SP|Q15084|PDIA6_HUMAN Protein disulfide-isomerase A6 OS=Homo sapiens OX=9606 GN=PDIA6 PE=1 SV=1;>SP|Q15084-4|PDIA6_HUMAN Isoform 4 of Protein disulfide-isom	PDIA6	7;7;7;7;7	5	141300	304420	640490	421070	467710	537490	397790	387840	392420	859850	0.584242	0.708073	0.18984	TB-EOT	Non significant
Q15121	Q15121;Q15121-2	>SP|Q15121|PEA15_HUMAN Astrocytic phosphoprotein PEA-15 OS=Homo sapiens OX=9606 GN=PEA15 PE=1 SV=2;>SP|Q15121-2|PEA15_HUMAN Isoform 2 of Astrocytic phosphoprotein PEA-15 OS=Homo sapiens OX=9606 GN=PEA15	PEA15	2;2	2	78155	50586	244960	147500	53172	261230	45378	79512	91040	239450	0.488247	0.626053	-0.26663	TB-EOT	Non significant
Q15149-7	Q15149-7;Q15149-8;Q15149-9;Q15149-5;Q15149-4;Q15149-6;Q15149-3;Q15149-2;Q15149	>SP|Q15149-7|PLEC_HUMAN Isoform 7 of Plectin OS=Homo sapiens OX=9606 GN=PLEC;>SP|Q15149-8|PLEC_HUMAN Isoform 8 of Plectin OS=Homo sapiens OX=9606 GN=PLEC;>SP|Q15149-9|PLEC_HUMAN Isoform 9 of Plectin OS=Homo sapiens OX=9606 GN=PLEC;>SP|Q15149-5|PLEC_HUMAN Isofo	PLEC	37;37;37;37;37;37;37;37;37	9	576730	243030	1184200	441740	502110	773650	173900	258460	727760	1150200	0.937573	0.962716	0.0318554	TB-EOT	Non significant
Q15181	Q15181	>SP|Q15181|IPYR_HUMAN Inorganic pyrophosphatase OS=Homo sapiens OX=9606 GN=PPA1 PE=1 SV=2	PPA1	9	1	250710	124630	655080	705840	612180	667870	394730	490820	793160	851700	0.00247439	0.0212684	0.979702	TB-EOT	Non significant
Q15185-4	Q15185-4;Q15185;Q15185-3;Q15185-2	>SP|Q15185-4|TEBP_HUMAN Isoform 4 of Prostaglandin E synthase 3 OS=Homo sapiens OX=9606 GN=PTGES3;>SP|Q15185|TEBP_HUMAN Prostaglandin E synthase 3 OS=Homo sapiens OX=9606 GN=PTGES3 PE=1 SV=1;>SP|Q15185-3|TEBP_HUMAN Isoform 3 of Prostaglandin E synthase 3 OS=H	PTGES3	7;7;6;3	4	74253	570210	1991400	755590	566550	2926700	742400	610990	671800	2014100	0.0766845	0.192322	-0.943321	TB-EOT	Non significant
Q15257-3	Q15257-3;Q15257-2;Q15257;Q15257-4	>SP|Q15257-3|PTPA_HUMAN Isoform 3 of Serine/threonine-protein phosphatase 2A activator OS=Homo sapiens OX=9606 GN=PTPA;>SP|Q15257-2|PTPA_HUMAN Isoform 1 of Serine/threonine-protein phosphatase 2A activator OS=Homo sapiens OX=9606 GN=PTPA;>SP|Q15257|PTPA_HUMAN	PPP2R4	7;7;7;5	4	140130	137790	797070	577160	625340	1079700	561010	461250	627650	1314600	0.325782	0.487226	0.373093	TB-EOT	Non significant
Q15286	Q15286;Q15286-2	>SP|Q15286|RAB35_HUMAN Ras-related protein Rab-35 OS=Homo sapiens OX=9606 GN=RAB35 PE=1 SV=1;>SP|Q15286-2|RAB35_HUMAN Isoform 2 of Ras-related protein Rab-35 OS=Homo sapiens OX=9606 GN=RAB35	RAB35	2;1	2	10357	6040.6	32322	18652	21633	35812	14657	10593	25588	46491	0.366735	0.523268	0.277234	TB-EOT	Non significant
Q15293-2	Q15293-2;Q15293	>SP|Q15293-2|RCN1_HUMAN Isoform 2 of Reticulocalbin-1 OS=Homo sapiens OX=9606 GN=RCN1;>SP|Q15293|RCN1_HUMAN Reticulocalbin-1 OS=Homo sapiens OX=9606 GN=RCN1 PE=1 SV=1	RCN1	2;2	2	2326.8	1894.4	18462	17789	11414	7715.9	14050	9698.6	140140	12740	0.0257543	0.0944141	1.77134	TB-EOT	Non significant
Q15365	Q15365;P57723-2;P57723	>SP|Q15365|PCBP1_HUMAN Poly(rC)-binding protein 1 OS=Homo sapiens OX=9606 GN=PCBP1 PE=1 SV=2	PCBP1	3;0;0	3	21806	20405	121260	51357	99569	114030	17640	29766	124860	138750	0.972127	0.98508	0.012958	TB-EOT	Non significant
Q15366-7	Q15366-7;Q15366-8;Q15366-4;Q15366-5;Q15366-6;Q15366-3;Q15366;Q15366-2;P57721-2;P57721-3;P57721-5;P57721-4;P57721	>SP|Q15366-7|PCBP2_HUMAN Isoform 7 of Poly(rC)-binding protein 2 OS=Homo sapiens OX=9606 GN=PCBP2;>SP|Q15366-8|PCBP2_HUMAN Isoform 8 of Poly(rC)-binding protein 2 OS=Homo sapiens OX=9606 GN=PCBP2;>SP|Q15366-4|PCBP2_HUMAN Isoform 4 of Poly(rC)-binding protein	PCBP2;PCBP3	3;3;3;3;3;3;3;3;1;1;1;1;1	13	76468	62768	267950	120220	200080	219220	50795	77531	330320	266260	0.482452	0.621346	0.243301	TB-EOT	Non significant
Q15370	Q15370;Q15370-2	>SP|Q15370|ELOB_HUMAN Elongin-B OS=Homo sapiens OX=9606 GN=ELOB PE=1 SV=1;>SP|Q15370-2|ELOB_HUMAN Isoform 2 of Elongin-B OS=Homo sapiens OX=9606 GN=ELOB	TCEB2	3;3	2	184650	267650	709800	290190	269460	1020700	124740	158100	359250	1099700	0.0151498	0.0675745	-0.794456	TB-EOT	Non significant
Q15404	Q15404;Q15404-2	>SP|Q15404|RSU1_HUMAN Ras suppressor protein 1 OS=Homo sapiens OX=9606 GN=RSU1 PE=1 SV=3;>SP|Q15404-2|RSU1_HUMAN Isoform 2 of Ras suppressor protein 1 OS=Homo sapiens OX=9606 GN=RSU1	RSU1	6;4	2	47075	94799	233460	130410	165940	156140	86536	104110	77122	347680	0.733797	0.823086	-0.122426	TB-EOT	Non significant
Q15424	Q15424;Q15424-4;Q15424-3;Q15424-2;Q14151	>SP|Q15424|SAFB1_HUMAN Scaffold attachment factor B1 OS=Homo sapiens OX=9606 GN=SAFB PE=1 SV=4;>SP|Q15424-4|SAFB1_HUMAN Isoform 4 of Scaffold attachment factor B1 OS=Homo sapiens OX=9606 GN=SAFB;>SP|Q15424-3|SAFB1_HUMAN Isoform 3 of Scaffold attachment factor	SAFB;SAFB2	3;3;3;2;2	5	145240	18908	98923	57739	86257	106780	31148	42708	204760	120530	0.077214	0.192529	0.980392	TB-EOT	Non significant
Q15435	Q15435;Q15435-3;Q15435-2;Q15435-5;Q15435-4	>SP|Q15435|PP1R7_HUMAN Protein phosphatase 1 regulatory subunit 7 OS=Homo sapiens OX=9606 GN=PPP1R7 PE=1 SV=1;>SP|Q15435-3|PP1R7_HUMAN Isoform 3 of Protein phosphatase 1 regulatory subunit 7 OS=Homo sapiens OX=9606 GN=PPP1R7;>SP|Q15435-2|PP1R7_HUMAN Isoform 2	PPP1R7	9;8;7;6;6	5	149300	229310	1177300	717580	662560	1497300	335390	502350	395740	1940400	0.325128	0.487226	-0.342226	TB-EOT	Non significant
Q15436	Q15436;Q15436-2	>SP|Q15436|SC23A_HUMAN Protein transport protein Sec23A OS=Homo sapiens OX=9606 GN=SEC23A PE=1 SV=2;>SP|Q15436-2|SC23A_HUMAN Isoform 2 of Protein transport protein Sec23A OS=Homo sapiens OX=9606 GN=SEC23A	SEC23A	4;2	2	4659.8	6117.9	43371	11651	15199	36477	9899.3	14394	11001	51518	0.166198	0.314022	-0.490751	TB-EOT	Non significant
Q15437	Q15437	>SP|Q15437|SC23B_HUMAN Protein transport protein Sec23B OS=Homo sapiens OX=9606 GN=SEC23B PE=1 SV=2	SEC23B	3	1	9894.2	22786	104400	42970	59006	74386	34130	47496	60404	69560	0.638818	0.747121	0.168031	TB-EOT	Non significant
Q15438-3	Q15438-3;Q15438-2;Q15438;Q99418-2;O43739-2;Q99418;O43739;Q9UIA0	>SP|Q15438-3|CYH1_HUMAN Isoform 3 of Cytohesin-1 OS=Homo sapiens OX=9606 GN=CYTH1;>SP|Q15438-2|CYH1_HUMAN Isoform 2 of Cytohesin-1 OS=Homo sapiens OX=9606 GN=CYTH1;>SP|Q15438|CYH1_HUMAN Cytohesin-1 OS=Homo sapiens OX=9606 GN=CYTH1 PE=1 SV=1;>SP|Q99418-2|CYH2_H	CYTH1;CYTH2;CYTH3	3;3;3;2;2;2;2;1	8	2740	7661.1	34448	12299	16055	44802	8158.7	8487.1	11439	62272	0.0166205	0.0714119	-0.896947	TB-EOT	Non significant
Q15582	Q15582	>SP|Q15582|BGH3_HUMAN Transforming growth factor-beta-induced protein ig-h3 OS=Homo sapiens OX=9606 GN=TGFBI PE=1 SV=1	TGFBI	9	1	83376	340360	489360	1288700	655870	371680	156130	345720	229710	275550	0.301182	0.465075	0.632284	TB-EOT	Non significant
Q15631	Q15631;Q15631-2	>SP|Q15631|TSN_HUMAN Translin OS=Homo sapiens OX=9606 GN=TSN PE=1 SV=1;>SP|Q15631-2|TSN_HUMAN Isoform 2 of Translin OS=Homo sapiens OX=9606 GN=TSN	TSN	8;4	2	135650	168860	883770	520640	471960	1028200	230960	375740	292640	1298100	0.413836	0.562661	-0.261732	TB-EOT	Non significant
Q15691	Q15691;Q9UPY8-2;Q15555-4;Q9UPY8;Q15555-5;Q15555-3;Q15555	>SP|Q15691|MARE1_HUMAN Microtubule-associated protein RP/EB family member 1 OS=Homo sapiens OX=9606 GN=MAPRE1 PE=1 SV=3	MAPRE1	9;1;1;1;1;1;1	7	424390	683320	3622800	1292800	1561700	4206300	600170	871960	804340	7337700	0.0123428	0.0590359	-0.951769	TB-EOT	Non significant
Q15746-9	Q15746-9;Q15746-11;Q15746-7;Q15746-4;Q15746-5;Q15746-2;Q15746-3;Q15746-6;Q15746	>SP|Q15746-9|MYLK_HUMAN Isoform 7 of Myosin light chain kinase, smooth muscle OS=Homo sapiens OX=9606 GN=MYLK;>SP|Q15746-11|MYLK_HUMAN Isoform 9 of Myosin light chain kinase, smooth muscle OS=Homo sapiens OX=9606 GN=MYLK;>SP|Q15746-7|MYLK_HUMAN Isoform 5 of M	MYLK	2;2;2;2;2;2;2;2;2	9	5685.1	13698	50441	28327	29343	60402	15277	24097	18487	92027	0.194486	0.347198	-0.454428	TB-EOT	Non significant
Q15785	Q15785	>SP|Q15785|TOM34_HUMAN Mitochondrial import receptor subunit TOM34 OS=Homo sapiens OX=9606 GN=TOMM34 PE=1 SV=2	TOMM34	2	1	7334.6	10451	24588	19554	20344	31889	15265	13460	18951	23598	0.23459	0.392167	0.373356	TB-EOT	Non significant
Q15833-2	Q15833-2;Q15833;Q15833-3	>SP|Q15833-2|STXB2_HUMAN Isoform 2 of Syntaxin-binding protein 2 OS=Homo sapiens OX=9606 GN=STXBP2;>SP|Q15833|STXB2_HUMAN Syntaxin-binding protein 2 OS=Homo sapiens OX=9606 GN=STXBP2 PE=1 SV=2;>SP|Q15833-3|STXB2_HUMAN Isoform 3 of Syntaxin-binding protein 2 O	STXBP2	10;10;10	3	94690	125920	696610	250960	424710	777530	69762	179890	173310	1186300	0.0394957	0.1221	-0.814992	TB-EOT	Non significant
Q15942-2	Q15942-2;Q15942	>SP|Q15942-2|ZYX_HUMAN Isoform 2 of Zyxin OS=Homo sapiens OX=9606 GN=ZYX;>SP|Q15942|ZYX_HUMAN Zyxin OS=Homo sapiens OX=9606 GN=ZYX PE=1 SV=1	ZYX	4;4	2	34256	105900	766530	128140	65430	621710	28636	93757	39267	537130	0.000374	0.00758473	-2.00422	TB-EOT	Downregulated
Q16181-2	Q16181-2;Q16181;Q6ZU15	>SP|Q16181-2|SEPT7_HUMAN Isoform 2 of Septin-7 OS=Homo sapiens OX=9606 GN=SEPT7;>SP|Q16181|SEPT7_HUMAN Septin-7 OS=Homo sapiens OX=9606 GN=SEPT7 PE=1 SV=2		11;11;1	3	175820	218770	749020	280620	314310	547450	192230	340780	263770	951420	0.459668	0.602719	-0.232651	TB-EOT	Non significant
Q16204	Q16204	>SP|Q16204|CCDC6_HUMAN Coiled-coil domain-containing protein 6 OS=Homo sapiens OX=9606 GN=CCDC6 PE=1 SV=2	CCDC6	3	1	8365.6	10738	33712	25458	20279	27810	11378	17992	34838	35483	0.161058	0.308138	0.391818	TB-EOT	Non significant
Q16222-2	Q16222-2;Q16222-3;Q16222;Q3KQV9	>SP|Q16222-2|UAP1_HUMAN Isoform AGX1 of UDP-N-acetylhexosamine pyrophosphorylase OS=Homo sapiens OX=9606 GN=UAP1;>SP|Q16222-3|UAP1_HUMAN Isoform 3 of UDP-N-acetylhexosamine pyrophosphorylase OS=Homo sapiens OX=9606 GN=UAP1;>SP|Q16222|UAP1_HUMAN UDP-N-acetylhe	UAP1	4;4;4;1	4	20452	29532	69014	90388	71798	102610	39107	57148	89356	82542	0.0474185	0.138433	0.617999	TB-EOT	Non significant
Q16348-2	Q16348-2;Q16348	>SP|Q16348-2|S15A2_HUMAN Isoform 2 of Solute carrier family 15 member 2 OS=Homo sapiens OX=9606 GN=SLC15A2;>SP|Q16348|S15A2_HUMAN Solute carrier family 15 member 2 OS=Homo sapiens OX=9606 GN=SLC15A2 PE=1 SV=2	SLC15A2	3;3	2	67151	20354	99413	94922	103110	259080	13924	27087	92592	209620	0.872427	0.915777	-0.0842104	TB-EOT	Non significant
Q16378	Q16378	>SP|Q16378|PROL4_HUMAN Proline-rich protein 4 OS=Homo sapiens OX=9606 GN=PRR4 PE=1 SV=3	PRR4	7	1	15028000	249470	47192000	20923000	12863000	4537500	2274700	2805400	147060000	2775000	0.0341851	0.11016	2.69705	TB-EOT	Non significant
Q16401-2	Q16401-2;Q16401	>SP|Q16401-2|PSMD5_HUMAN Isoform 2 of 26S proteasome non-ATPase regulatory subunit 5 OS=Homo sapiens OX=9606 GN=PSMD5;>SP|Q16401|PSMD5_HUMAN 26S proteasome non-ATPase regulatory subunit 5 OS=Homo sapiens OX=9606 GN=PSMD5 PE=1 SV=3	PSMD5	3;3	2	9002.1	11993	91812	57225	45769	86983	16294	37795	28257	110220	0.584895	0.7083	-0.206885	TB-EOT	Non significant
Q16531	Q16531;Q16531-2	>SP|Q16531|DDB1_HUMAN DNA damage-binding protein 1 OS=Homo sapiens OX=9606 GN=DDB1 PE=1 SV=1	DDB1	21;8	2	252900	195670	1210700	657810	827570	1445500	618160	431820	783790	1720100	0.553891	0.681007	0.195318	TB-EOT	Non significant
Q16539-2	Q16539-2;Q16539;Q16539-3;Q16539-5;Q16539-4	>SP|Q16539-2|MK14_HUMAN Isoform CSBP1 of Mitogen-activated protein kinase 14 OS=Homo sapiens OX=9606 GN=MAPK14;>SP|Q16539|MK14_HUMAN Mitogen-activated protein kinase 14 OS=Homo sapiens OX=9606 GN=MAPK14 PE=1 SV=3;>SP|Q16539-3|MK14_HUMAN Isoform Mxi2 of Mitoge	MAPK14	3;3;2;1;1	5	20941	26377	163710	71997	108220	142020	26357	45796	75752	321550	0.255675	0.417254	-0.398681	TB-EOT	Non significant
Q16543	Q16543	>SP|Q16543|CDC37_HUMAN Hsp90 co-chaperone Cdc37 OS=Homo sapiens OX=9606 GN=CDC37 PE=1 SV=1	CDC37	11	1	263050	854310	3223800	1079600	1107600	3912700	653910	778730	847950	5445100	0.0027434	0.0223091	-1.09137	TB-EOT	Downregulated
Q16555-2	Q16555-2;Q16555;Q14194;Q14194-2;Q14195;Q14195-2	>SP|Q16555-2|DPYL2_HUMAN Isoform 2 of Dihydropyrimidinase-related protein 2 OS=Homo sapiens OX=9606 GN=DPYSL2;>SP|Q16555|DPYL2_HUMAN Dihydropyrimidinase-related protein 2 OS=Homo sapiens OX=9606 GN=DPYSL2 PE=1 SV=1	DPYSL2	12;12;2;2;1;1	6	101380	462100	1111200	497400	261530	652500	189030	430220	187960	1069600	0.0756231	0.191068	-0.818582	TB-EOT	Non significant
Q16610	Q16610;Q16610-4;Q16610-2;Q16610-3	>SP|Q16610|ECM1_HUMAN Extracellular matrix protein 1 OS=Homo sapiens OX=9606 GN=ECM1 PE=1 SV=2;>SP|Q16610-4|ECM1_HUMAN Isoform 4 of Extracellular matrix protein 1 OS=Homo sapiens OX=9606 GN=ECM1;>SP|Q16610-2|ECM1_HUMAN Isoform 2 of Extracellular matrix protei	ECM1	10;10;6;2	4	140620	349770	515900	751220	388800	383630	355900	561080	470700	289190	0.067739	0.176423	0.931797	TB-EOT	Non significant
Q16658	Q16658	>SP|Q16658|FSCN1_HUMAN Fascin OS=Homo sapiens OX=9606 GN=FSCN1 PE=1 SV=3	FSCN1	3	1	12270	46828	87074	57258	35136	91086	50681	112010	43493	91298	0.966686	0.982791	0.0210475	TB-EOT	Non significant
Q16719	Q16719;Q16719-2	>SP|Q16719|KYNU_HUMAN Kynureninase OS=Homo sapiens OX=9606 GN=KYNU PE=1 SV=1;>SP|Q16719-2|KYNU_HUMAN Isoform 2 of Kynureninase OS=Homo sapiens OX=9606 GN=KYNU	KYNU	15;10	2	270470	678870	3388200	1072900	821560	3408000	220180	380990	304620	9989200	0.000784647	0.0111569	-1.94188	TB-EOT	Downregulated
Q16775-2	Q16775-2;Q16775	>SP|Q16775-2|GLO2_HUMAN Isoform 2 of Hydroxyacylglutathione hydrolase, mitochondrial OS=Homo sapiens OX=9606 GN=HAGH;>SP|Q16775|GLO2_HUMAN Hydroxyacylglutathione hydrolase, mitochondrial OS=Homo sapiens OX=9606 GN=HAGH PE=1 SV=2	HAGH	3;3	2	70819	24291	163720	83165	71902	194430	109580	66510	98092	230470	0.3881	0.539847	0.361657	TB-EOT	Non significant
Q16778	Q16778;P33778;P23527;P06899;Q8N257;Q6DRA6;Q6DN03	>SP|Q16778|H2B2E_HUMAN Histone H2B type 2-E OS=Homo sapiens OX=9606 GN=HIST2H2BE PE=1 SV=3;>SP|P33778|H2B1B_HUMAN Histone H2B type 1-B OS=Homo sapiens OX=9606 GN=HIST1H2BB PE=1 SV=2;>SP|P23527|H2B1O_HUMAN Histone H2B type 1-O OS=Homo sapiens OX=9606 GN=HIST1H	HIST2H2BE;HIST1H2BB;HIST1H2BO;HIST1H2BJ;HIST3H2BB	2;2;2;2;2;2;2	7	17467	9949.3	65844	32718	2294800	84107	34193	101620	95077	110440	0.105788	0.234212	1.66587	TB-EOT	Non significant
Q16831	Q16831;Q16831-2	>SP|Q16831|UPP1_HUMAN Uridine phosphorylase 1 OS=Homo sapiens OX=9606 GN=UPP1 PE=1 SV=1	UPP1	5;0	2	34643	119730	337400	84543	132310	350570	34058	55729	89799	785300	0.000250928	0.0063594	-1.49534	TB-EOT	Downregulated
Q16851-2	Q16851-2;Q16851	>SP|Q16851-2|UGPA_HUMAN Isoform 2 of UTP--glucose-1-phosphate uridylyltransferase OS=Homo sapiens OX=9606 GN=UGP2;>SP|Q16851|UGPA_HUMAN UTP--glucose-1-phosphate uridylyltransferase OS=Homo sapiens OX=9606 GN=UGP2 PE=1 SV=5	UGP2	15;14	2	196340	316940	2483200	1214700	2330700	2629200	438860	787070	968870	4163600	0.466596	0.606575	-0.323795	TB-EOT	Non significant
Q16881-5	Q16881-5;Q16881-2;Q16881-4;Q16881-3;Q16881-6;Q16881;Q16881-7;Q9NNW7-2;Q9NNW7	>SP|Q16881-5|TRXR1_HUMAN Isoform 5 of Thioredoxin reductase 1, cytoplasmic OS=Homo sapiens OX=9606 GN=TXNRD1;>SP|Q16881-2|TRXR1_HUMAN Isoform 2 of Thioredoxin reductase 1, cytoplasmic OS=Homo sapiens OX=9606 GN=TXNRD1;>SP|Q16881-4|TRXR1_HUMAN Isoform 4 of Thi	TXNRD1	16;16;16;16;16;16;13;1;1	9	1085800	1421100	7484400	1722300	2562300	11583000	534240	1277900	3643300	12157000	0.00617409	0.0386452	-1.18394	TB-EOT	Downregulated
Q1KMD3	Q1KMD3	>SP|Q1KMD3|HNRL2_HUMAN Heterogeneous nuclear ribonucleoprotein U-like protein 2 OS=Homo sapiens OX=9606 GN=HNRNPUL2 PE=1 SV=1	HNRNPUL2	3	1	75749	20501	78970	51225	56168	92249	31747	32492	144620	168180	0.240275	0.398538	0.53185	TB-EOT	Non significant
Q2VIR3-2	Q2VIR3-2;Q2VIR3;P41091	>SP|Q2VIR3-2|IF2GL_HUMAN Isoform 2 of Eukaryotic translation initiation factor 2 subunit 3B OS=Homo sapiens OX=9606 GN=EIF2S3B;>SP|Q2VIR3|IF2GL_HUMAN Eukaryotic translation initiation factor 2 subunit 3B OS=Homo sapiens OX=9606 GN=EIF2S3B PE=2 SV=2;>SP|P41091	EIF2S3L;EIF2S3	3;3;3	3	18071	37527	143650	87265	79455	55300	48178	49988	59913	92155	0.352472	0.511555	0.358414	TB-EOT	Non significant
Q32MZ4-3	Q32MZ4-3;Q32MZ4-2;Q32MZ4;Q32MZ4-4	>SP|Q32MZ4-3|LRRF1_HUMAN Isoform 3 of Leucine-rich repeat flightless-interacting protein 1 OS=Homo sapiens OX=9606 GN=LRRFIP1;>SP|Q32MZ4-2|LRRF1_HUMAN Isoform 2 of Leucine-rich repeat flightless-interacting protein 1 OS=Homo sapiens OX=9606 GN=LRRFIP1;>SP|Q32	LRRFIP1	16;16;16;3	4	2472300	926400	2674800	896100	1184000	4759800	240310	763460	1447100	4683600	0.250033	0.409807	-0.676566	TB-EOT	Non significant
Q3LXA3-2	Q3LXA3-2;Q3LXA3	>SP|Q3LXA3-2|TKFC_HUMAN Isoform 2 of Triokinase/FMN cyclase OS=Homo sapiens OX=9606 GN=TKFC;>SP|Q3LXA3|TKFC_HUMAN Triokinase/FMN cyclase OS=Homo sapiens OX=9606 GN=TKFC PE=1 SV=2	DAK	4;4	2	8262	4525.8	52339	31335	47712	54554	18620	30447	50684	47847	0.06717	0.175241	0.781681	TB-EOT	Non significant
Q3YEC7	Q3YEC7;Q3YEC7-2	>SP|Q3YEC7|RABL6_HUMAN Rab-like protein 6 OS=Homo sapiens OX=9606 GN=RABL6 PE=1 SV=2;>SP|Q3YEC7-2|RABL6_HUMAN Isoform 2 of Rab-like protein 6 OS=Homo sapiens OX=9606 GN=RABL6	RABL6	3;3	2	18340	13119	57036	18829	27519	53464	14385	15169	43695	40710	0.755041	0.836664	0.104065	TB-EOT	Non significant
Q4G0F5	Q4G0F5	>SP|Q4G0F5|VP26B_HUMAN Vacuolar protein sorting-associated protein 26B OS=Homo sapiens OX=9606 GN=VPS26B PE=1 SV=2	VPS26B	4	1	43119	135480	176420	103810	98977	143370	53616	92779	100530	259020	0.42459	0.569137	-0.292506	TB-EOT	Non significant
Q4V328-3	Q4V328-3;Q4V328-2;Q4V328-4;Q4V328	>SP|Q4V328-3|GRAP1_HUMAN Isoform 3 of GRIP1-associated protein 1 OS=Homo sapiens OX=9606 GN=GRIPAP1;>SP|Q4V328-2|GRAP1_HUMAN Isoform 2 of GRIP1-associated protein 1 OS=Homo sapiens OX=9606 GN=GRIPAP1;>SP|Q4V328-4|GRAP1_HUMAN Isoform 4 of GRIP1-associated prot	GRIPAP1	4;4;4;4	4	20001	10097	36956	19121	27532	49746	10386	15652	39266	40405	0.352066	0.511453	0.311902	TB-EOT	Non significant
Q53EL6-2	Q53EL6-2;Q53EL6	>SP|Q53EL6-2|PDCD4_HUMAN Isoform 2 of Programmed cell death protein 4 OS=Homo sapiens OX=9606 GN=PDCD4;>SP|Q53EL6|PDCD4_HUMAN Programmed cell death protein 4 OS=Homo sapiens OX=9606 GN=PDCD4 PE=1 SV=2	PDCD4	6;6	2	49684	67781	179610	138280	137910	265800	77380	130450	125560	234270	0.535719	0.664624	0.170776	TB-EOT	Non significant
Q53GD3	Q53GD3;Q53GD3-3;Q53GD3-4;Q53GD3-2	>SP|Q53GD3|CTL4_HUMAN Choline transporter-like protein 4 OS=Homo sapiens OX=9606 GN=SLC44A4 PE=1 SV=2;>SP|Q53GD3-3|CTL4_HUMAN Isoform 3 of Choline transporter-like protein 4 OS=Homo sapiens OX=9606 GN=SLC44A4;>SP|Q53GD3-4|CTL4_HUMAN Isoform 4 of Choline trans	SLC44A4	4;3;3;2	4	514200	476190	1545000	585110	1574100	2700200	112570	333040	1592400	1997900	0.34847	0.509081	-0.49725	TB-EOT	Non significant
Q53T59	Q53T59	>SP|Q53T59|H1BP3_HUMAN HCLS1-binding protein 3 OS=Homo sapiens OX=9606 GN=HS1BP3 PE=1 SV=1	HS1BP3	5	1	31678	93790	414610	129880	66687	617170	14049	76585	86281	593020	0.000659505	0.010559	-1.81341	TB-EOT	Downregulated
Q5H9R7-3	Q5H9R7-3;Q5H9R7-4;Q5H9R7-6;Q5H9R7-2;Q5H9R7;Q5H9R7-5	>SP|Q5H9R7-3|PP6R3_HUMAN Isoform 3 of Serine/threonine-protein phosphatase 6 regulatory subunit 3 OS=Homo sapiens OX=9606 GN=PPP6R3;>SP|Q5H9R7-4|PP6R3_HUMAN Isoform 4 of Serine/threonine-protein phosphatase 6 regulatory subunit 3 OS=Homo sapiens OX=9606 GN=P	PPP6R3	3;3;3;3;3;3	6	3320.8	22029	93180	36016	26912	91842	13417	26727	22509	102990	0.0197319	0.0782512	-1.09018	TB-EOT	Non significant
Q5JSH3-4	Q5JSH3-4;Q5JSH3-2;Q5JSH3	>SP|Q5JSH3-4|WDR44_HUMAN Isoform 4 of WD repeat-containing protein 44 OS=Homo sapiens OX=9606 GN=WDR44;>SP|Q5JSH3-2|WDR44_HUMAN Isoform 2 of WD repeat-containing protein 44 OS=Homo sapiens OX=9606 GN=WDR44;>SP|Q5JSH3|WDR44_HUMAN WD repeat-containing protein 4	WDR44	2;2;2	3	19918	16144	42017	19690	12592	32565	6986.8	15740	20030	29989	0.847935	0.900635	-0.0811946	TB-EOT	Non significant
Q5RHP9-2	Q5RHP9-2;Q5RHP9	>SP|Q5RHP9-2|ERIC3_HUMAN Isoform 2 of Glutamate-rich protein 3 OS=Homo sapiens OX=9606 GN=ERICH3;>SP|Q5RHP9|ERIC3_HUMAN Glutamate-rich protein 3 OS=Homo sapiens OX=9606 GN=ERICH3 PE=2 SV=1	ERICH3	7;7	2	783360	124340	234230	372290	450070	707640	389230	217760	1568800	243240	0.00803363	0.0454244	1.79398	TB-EOT	Upregulated
Q5T013-2	Q5T013-2;Q5T013-4;Q5T013-3;Q5T013	>SP|Q5T013-2|HYI_HUMAN Isoform 2 of Putative hydroxypyruvate isomerase OS=Homo sapiens OX=9606 GN=HYI;>SP|Q5T013-4|HYI_HUMAN Isoform 4 of Putative hydroxypyruvate isomerase OS=Homo sapiens OX=9606 GN=HYI;>SP|Q5T013-3|HYI_HUMAN Isoform 3 of Putative hydroxypyr	HYI	3;3;2;2	4	4987.2	3205.2	12062	16285	12402	14496	12215	8798.8	16629	13731	0.0025885	0.021752	1.09319	TB-EOT	Upregulated
Q5T1M5-2	Q5T1M5-2;Q5T1M5;Q5T1M5-3	>SP|Q5T1M5-2|FKB15_HUMAN Isoform 2 of FK506-binding protein 15 OS=Homo sapiens OX=9606 GN=FKBP15;>SP|Q5T1M5|FKB15_HUMAN FK506-binding protein 15 OS=Homo sapiens OX=9606 GN=FKBP15 PE=1 SV=2	FKBP15	12;12;2	3	108980	91204	278900	65032	105480	404180	50158	71906	136430	570110	0.0429358	0.13032	-0.851417	TB-EOT	Non significant
Q5T6V5	Q5T6V5	>SP|Q5T6V5|QSPP_HUMAN Queuosine salvage protein OS=Homo sapiens OX=9606 GN=C9orf64 PE=1 SV=1	C9orf64	8	1	90167	156880	772410	417960	332010	1161900	381910	357490	248570	1578800	0.280311	0.445045	-0.467195	TB-EOT	Non significant
Q5TD94-3	Q5TD94-3;Q5TD94;Q5TD94-2	>SP|Q5TD94-3|RSH4A_HUMAN Isoform 3 of Radial spoke head protein 4 homolog A OS=Homo sapiens OX=9606 GN=RSPH4A;>SP|Q5TD94|RSH4A_HUMAN Radial spoke head protein 4 homolog A OS=Homo sapiens OX=9606 GN=RSPH4A PE=1 SV=1;>SP|Q5TD94-2|RSH4A_HUMAN Isoform 2 of Radial	RSPH4A	2;2;1	3	1474.6	1307	15901	8351.3	5531.1	18525	3763	4524.7	11633	16703	0.965466	0.982257	-0.0187146	TB-EOT	Non significant
Q5TDH0	Q5TDH0;Q5TDH0-3;Q5TDH0-2	>SP|Q5TDH0|DDI2_HUMAN Protein DDI1 homolog 2 OS=Homo sapiens OX=9606 GN=DDI2 PE=1 SV=1;>SP|Q5TDH0-3|DDI2_HUMAN Isoform 3 of Protein DDI1 homolog 2 OS=Homo sapiens OX=9606 GN=DDI2;>SP|Q5TDH0-2|DDI2_HUMAN Isoform 2 of Protein DDI1 homolog 2 OS=Homo sapiens OX=9	DDI2	3;3;2	3	22421	15159	104360	74409	45601	136450	38296	51346	50607	166670	0.882069	0.92335	0.0518186	TB-EOT	Non significant
Q5TEJ8	Q5TEJ8;Q5TEJ8-3;Q5TEJ8-5;Q5TEJ8-2;Q5TEJ8-6	>SP|Q5TEJ8|THMS2_HUMAN Protein THEMIS2 OS=Homo sapiens OX=9606 GN=THEMIS2 PE=1 SV=1;>SP|Q5TEJ8-3|THMS2_HUMAN Isoform 3 of Protein THEMIS2 OS=Homo sapiens OX=9606 GN=THEMIS2;>SP|Q5TEJ8-5|THMS2_HUMAN Isoform 5 of Protein THEMIS2 OS=Homo sapiens OX=9606 GN=THEMI	THEMIS2	4;3;3;2;2	5	7486.8	31017	84995	41746	29110	89066	14278	19303	18433	162960	0.002924	0.0230435	-1.19635	TB-EOT	Downregulated
Q5TFE4	Q5TFE4;Q5TFE4-2	>SP|Q5TFE4|NT5D1_HUMAN 5-nucleotidase domain-containing protein 1 OS=Homo sapiens OX=9606 GN=NT5DC1 PE=1 SV=1;>SP|Q5TFE4-2|NT5D1_HUMAN Isoform 2 of 5-nucleotidase domain-containing protein 1 OS=Homo sapiens OX=9606 GN=NT5DC1	NT5DC1	6;4	2	41260	172620	564110	482020	262390	1216600	524290	367850	277510	969280	0.56331	0.688741	-0.329698	TB-EOT	Non significant
Q5VT79	Q5VT79;P13928;P13928-3;Q5VT79-2;P13928-2	>SP|Q5VT79|AXA81_HUMAN Annexin A8-like protein 1 OS=Homo sapiens OX=9606 GN=ANXA8L1 PE=2 SV=2;>SP|P13928|ANXA8_HUMAN Annexin A8 OS=Homo sapiens OX=9606 GN=ANXA8 PE=1 SV=3;>SP|P13928-3|ANXA8_HUMAN Isoform 3 of Annexin A8 OS=Homo sapiens OX=9606 GN=ANXA8;>SP|Q5V	ANXA8L2;ANXA8	4;4;3;2;1	5	103280	20360	107460	154040	125610	142910	126960	175070	106380	97218	0.000848968	0.011188	1.66024	TB-EOT	Upregulated
Q5VTE0	Q5VTE0;P68104;P68104-2;Q05639	>SP|Q5VTE0|EF1A3_HUMAN Putative elongation factor 1-alpha-like 3 OS=Homo sapiens OX=9606 GN=EEF1A1P5 PE=5 SV=1;>SP|P68104|EF1A1_HUMAN Elongation factor 1-alpha 1 OS=Homo sapiens OX=9606 GN=EEF1A1 PE=1 SV=1;>SP|P68104-2|EF1A1_HUMAN Isoform 2 of Elongation fact	EEF1A1P5;EEF1A1	13;13;11;6	4	481350	3216900	11439000	2643200	4241600	10344000	1154600	1899500	6370600	13037000	0.0102693	0.0531278	-1.17244	TB-EOT	Non significant
Q5VW32	Q5VW32;Q5VW32-2	>SP|Q5VW32|BROX_HUMAN BRO1 domain-containing protein BROX OS=Homo sapiens OX=9606 GN=BROX PE=1 SV=1;>SP|Q5VW32-2|BROX_HUMAN Isoform 2 of BRO1 domain-containing protein BROX OS=Homo sapiens OX=9606 GN=BROX	BROX	5;4	2	34584	85521	363610	263820	63393	623300	45932	117750	103370	583330	0.0186724	0.0769532	-1.11936	TB-EOT	Non significant
Q5VZ89-5	Q5VZ89-5;Q5VZ89-3;Q5VZ89;Q5VZ89-7	>SP|Q5VZ89-5|DEN4C_HUMAN Isoform 5 of DENN domain-containing protein 4C OS=Homo sapiens OX=9606 GN=DENND4C;>SP|Q5VZ89-3|DEN4C_HUMAN Isoform 3 of DENN domain-containing protein 4C OS=Homo sapiens OX=9606 GN=DENND4C;>SP|Q5VZ89|DEN4C_HUMAN DENN domain-containing	DENND4C	5;5;5;5	4	17436	78353	188260	37294	61148	200130	18958	33199	34070	303390	8.16125e-05	0.00456573	-1.63268	TB-EOT	Downregulated
Q5Y7A7	Q5Y7A7;P01912;P01911;P20039	>SP|Q5Y7A7|2B1D_HUMAN HLA class II histocompatibility antigen, DRB1-13 beta chain OS=Homo sapiens OX=9606 GN=HLA-DRB1 PE=1 SV=1;>SP|P01912|2B13_HUMAN HLA class II histocompatibility antigen, DRB1-3 chain OS=Homo sapiens OX=9606 GN=HLA-DRB1 PE=1 SV=2;>SP|P0191	HLA-DRB1	2;1;0;0	4	687660	1343600	1457600	1457100	1968800	4458500	370700	822670	826480	6239600	0.102956	0.229278	-0.75259	TB-EOT	Non significant
Q63HN8	Q63HN8;Q63HN8-4;Q63HN8-6	>SP|Q63HN8|RN213_HUMAN E3 ubiquitin-protein ligase RNF213 OS=Homo sapiens OX=9606 GN=RNF213 PE=1 SV=3;>SP|Q63HN8-4|RN213_HUMAN Isoform 2 of E3 ubiquitin-protein ligase RNF213 OS=Homo sapiens OX=9606 GN=RNF213	RNF213	3;3;1	3	2848.5	8357.7	25246	9942.3	10015	25867	5134.3	10072	9884.9	33360	0.0334507	0.109652	-0.653607	TB-EOT	Non significant
Q641Q2-2	Q641Q2-2;Q641Q2;Q9Y4E1-5;Q9Y4E1-3;Q9Y4E1-6;Q9Y4E1-2;Q9Y4E1-1;Q9Y4E1	>SP|Q641Q2-2|WAC2A_HUMAN Isoform 2 of WASH complex subunit 2A OS=Homo sapiens OX=9606 GN=WASHC2A;>SP|Q641Q2|WAC2A_HUMAN WASH complex subunit 2A OS=Homo sapiens OX=9606 GN=WASHC2A PE=1 SV=3;>SP|Q9Y4E1-5|WAC2C_HUMAN Isoform 5 of WASH complex subunit 2C OS=Homo	FAM21A;FAM21C	3;3;2;2;2;2;2;2	8	39309	50466	108980	39792	39498	164690	17681	28685	29161	187950	0.0164598	0.0712603	-1.01719	TB-EOT	Non significant
Q687X5	Q687X5;Q687X5-2	>SP|Q687X5|STEA4_HUMAN Metalloreductase STEAP4 OS=Homo sapiens OX=9606 GN=STEAP4 PE=1 SV=1;>SP|Q687X5-2|STEA4_HUMAN Isoform 2 of Metalloreductase STEAP4 OS=Homo sapiens OX=9606 GN=STEAP4	STEAP4	6;5	2	62781	75702	229320	158300	186250	596870	60709	70026	193170	323360	0.355863	0.514671	-0.308548	TB-EOT	Non significant
Q6BCY4	Q6BCY4;Q6BCY4-2	>SP|Q6BCY4|NB5R2_HUMAN NADH-cytochrome b5 reductase 2 OS=Homo sapiens OX=9606 GN=CYB5R2 PE=1 SV=1;>SP|Q6BCY4-2|NB5R2_HUMAN Isoform 2 of NADH-cytochrome b5 reductase 2 OS=Homo sapiens OX=9606 GN=CYB5R2	CYB5R2	6;5	2	22712	52980	166350	87959	98178	379690	171750	98866	159790	801930	0.376904	0.533275	-0.480841	TB-EOT	Non significant
Q6IA69	Q6IA69;Q6IA69-2	>SP|Q6IA69|NADE_HUMAN Glutamine-dependent NAD(+) synthetase OS=Homo sapiens OX=9606 GN=NADSYN1 PE=1 SV=3;>SP|Q6IA69-2|NADE_HUMAN Isoform 2 of Glutamine-dependent NAD(+) synthetase OS=Homo sapiens OX=9606 GN=NADSYN1	NADSYN1	3;2	2	13541	22242	22303	15340	24563	57189	5882.3	7332.4	23205	81859	0.122553	0.258533	-0.715444	TB-EOT	Non significant
Q6IBS0	Q6IBS0;Q9NR96-4	>SP|Q6IBS0|TWF2_HUMAN Twinfilin-2 OS=Homo sapiens OX=9606 GN=TWF2 PE=1 SV=2	TWF2	7;1	2	197280	703660	3498200	1077800	979370	3394600	472510	635480	475190	5800000	0.00194186	0.0190553	-1.38783	TB-EOT	Downregulated
Q6JBY9	Q6JBY9;Q6JBY9-2	>SP|Q6JBY9|CPZIP_HUMAN CapZ-interacting protein OS=Homo sapiens OX=9606 GN=RCSD1 PE=1 SV=1;>SP|Q6JBY9-2|CPZIP_HUMAN Isoform 2 of CapZ-interacting protein OS=Homo sapiens OX=9606 GN=RCSD1	RCSD1	2;1	2	133050	10935	45038	21749	42195	42340	11421	17314	79697	49961	0.15889	0.305526	0.999962	TB-EOT	Non significant
Q6P179-3	Q6P179-3;Q6P179	>SP|Q6P179-3|ERAP2_HUMAN Isoform 3 of Endoplasmic reticulum aminopeptidase 2 OS=Homo sapiens OX=9606 GN=ERAP2;>SP|Q6P179|ERAP2_HUMAN Endoplasmic reticulum aminopeptidase 2 OS=Homo sapiens OX=9606 GN=ERAP2 PE=1 SV=2	ERAP2	2;2	2	1631.8	2656.4	2027.4	8411.1	6543.4	8675.4	4147.3	6963.6	6616	25863	0.25484	0.416339	0.642094	TB-EOT	Non significant
Q6P1N9	Q6P1N9;Q6P1N9-2	>SP|Q6P1N9|TATD1_HUMAN Putative deoxyribonuclease TATDN1 OS=Homo sapiens OX=9606 GN=TATDN1 PE=1 SV=2;>SP|Q6P1N9-2|TATD1_HUMAN Isoform 2 of Putative deoxyribonuclease TATDN1 OS=Homo sapiens OX=9606 GN=TATDN1	TATDN1	5;4	2	59533	110520	213580	69713	60601	174320	71237	51714	69768	680970	0.0379522	0.118776	-1.00332	TB-EOT	Non significant
Q6P4A8	Q6P4A8	>SP|Q6P4A8|PLBL1_HUMAN Phospholipase B-like 1 OS=Homo sapiens OX=9606 GN=PLBD1 PE=1 SV=2	PLBD1	9	1	774050	265270	526250	133740	596430	878300	122610	159040	268260	1667200	0.44569	0.589987	-0.502755	TB-EOT	Non significant
Q6P5S2	Q6P5S2	>SP|Q6P5S2|LEG1H_HUMAN Protein LEG1 homolog OS=Homo sapiens OX=9606 GN=LEG1 PE=1 SV=2	LEG1	8	1	8349000	496470	5479600	3369600	5466000	3512800	845220	1148300	44520000	2436900	0.0509118	0.144517	1.83829	TB-EOT	Non significant
Q6P6B1	Q6P6B1	>SP|Q6P6B1|ERIC5_HUMAN Glutamate-rich protein 5 OS=Homo sapiens OX=9606 GN=ERICH5 PE=2 SV=1	ERICH5	2	1	25259	6939.4	22045	21907	17393	91439	10625	12687	62041	34165	0.325882	0.487226	0.517802	TB-EOT	Non significant
Q6PCE3	Q6PCE3	>SP|Q6PCE3|PGM2L_HUMAN Glucose 1,6-bisphosphate synthase OS=Homo sapiens OX=9606 GN=PGM2L1 PE=1 SV=3	PGM2L1	3	1	3665.2	20301	123480	55384	49210	193300	29886	42056	50298	93053	0.261284	0.423649	-0.626854	TB-EOT	Non significant
Q6UX06	Q6UX06	>SP|Q6UX06|OLFM4_HUMAN Olfactomedin-4 OS=Homo sapiens OX=9606 GN=OLFM4 PE=1 SV=1	OLFM4	4	1	137060	1740.9	102610	24356	38619	15381	23474	50248	347640	20477	0.00746867	0.0433582	2.8493	TB-EOT	Upregulated
Q6UX71	Q6UX71;Q6UX71-2	>SP|Q6UX71|PXDC2_HUMAN Plexin domain-containing protein 2 OS=Homo sapiens OX=9606 GN=PLXDC2 PE=1 SV=1;>SP|Q6UX71-2|PXDC2_HUMAN Isoform 2 of Plexin domain-containing protein 2 OS=Homo sapiens OX=9606 GN=PLXDC2	PLXDC2	11;8	2	401490	287090	999300	3379400	1237200	2285300	325150	1016900	415290	1108100	0.268137	0.430661	0.619725	TB-EOT	Non significant
Q6UX73-2	Q6UX73-2;Q6UX73;Q6NSJ2	>SP|Q6UX73-2|CP089_HUMAN Isoform 2 of UPF0764 protein C16orf89 OS=Homo sapiens OX=9606 GN=C16orf89;>SP|Q6UX73|CP089_HUMAN UPF0764 protein C16orf89 OS=Homo sapiens OX=9606 GN=C16orf89 PE=1 SV=2	C16orf89	7;7;1	3	39195	128040	392860	585750	417220	760080	40089	125620	302160	434500	0.531054	0.662076	-0.342434	TB-EOT	Non significant
Q6UXB2	Q6UXB2	>SP|Q6UXB2|CXL17_HUMAN C-X-C motif chemokine 17 OS=Homo sapiens OX=9606 GN=CXCL17 PE=1 SV=1	CXCL17	2	1	99535	17761	135400	28860	94579	36799	6245.9	11898	326550	31592	0.318092	0.484302	0.940027	TB-EOT	Non significant
Q6UXB8-2	Q6UXB8-2;Q6UXB8	>SP|Q6UXB8-2|PI16_HUMAN Isoform 2 of Peptidase inhibitor 16 OS=Homo sapiens OX=9606 GN=PI16;>SP|Q6UXB8|PI16_HUMAN Peptidase inhibitor 16 OS=Homo sapiens OX=9606 GN=PI16 PE=1 SV=1	PI16	2;2	2	10800	5060.3	13531	20813	16857	8496.4	12979	22411	27893	9188.7	0.000101335	0.00456573	1.90693	TB-EOT	Upregulated
Q6UXY8-2	Q6UXY8-2;Q6UXY8;Q6UXY8-4;Q6UXY8-3	>SP|Q6UXY8-2|TMC5_HUMAN Isoform 2 of Transmembrane channel-like protein 5 OS=Homo sapiens OX=9606 GN=TMC5;>SP|Q6UXY8|TMC5_HUMAN Transmembrane channel-like protein 5 OS=Homo sapiens OX=9606 GN=TMC5 PE=2 SV=3	TMC5	5;5;2;2	4	136830	107830	498300	276610	507490	741560	177160	157890	364510	536740	0.537635	0.666457	0.191131	TB-EOT	Non significant
Q6WKZ4-3	Q6WKZ4-3;Q6WKZ4;Q6WKZ4-2;Q6WKZ4-5	>SP|Q6WKZ4-3|RFIP1_HUMAN Isoform 2 of Rab11 family-interacting protein 1 OS=Homo sapiens OX=9606 GN=RAB11FIP1;>SP|Q6WKZ4|RFIP1_HUMAN Rab11 family-interacting protein 1 OS=Homo sapiens OX=9606 GN=RAB11FIP1 PE=1 SV=3;>SP|Q6WKZ4-2|RFIP1_HUMAN Isoform 4 of Rab11	RAB11FIP1	3;3;2;1	4	15429	10897	37247	13750	14118	35312	8721.5	10573	24193	35208	0.771852	0.84887	-0.100227	TB-EOT	Non significant
Q6XQN6	Q6XQN6;Q6XQN6-3;Q6XQN6-2	>SP|Q6XQN6|PNCB_HUMAN Nicotinate phosphoribosyltransferase OS=Homo sapiens OX=9606 GN=NAPRT PE=1 SV=2;>SP|Q6XQN6-3|PNCB_HUMAN Isoform 3 of Nicotinate phosphoribosyltransferase OS=Homo sapiens OX=9606 GN=NAPRT;>SP|Q6XQN6-2|PNCB_HUMAN Isoform 2 of Nicotinate ph	NAPRT	8;7;7	3	36108	120820	557680	317900	282130	529540	230910	268540	233890	501240	0.840469	0.897919	-0.0876847	TB-EOT	Non significant
Q6YHK3-3	Q6YHK3-3;Q6YHK3-2;Q6YHK3-4;Q6YHK3	>SP|Q6YHK3-3|CD109_HUMAN Isoform 3 of CD109 antigen OS=Homo sapiens OX=9606 GN=CD109;>SP|Q6YHK3-2|CD109_HUMAN Isoform 2 of CD109 antigen OS=Homo sapiens OX=9606 GN=CD109;>SP|Q6YHK3-4|CD109_HUMAN Isoform 4 of CD109 antigen OS=Homo sapiens OX=9606 GN=CD109;>SP|Q	CD109	3;3;3;3	4	13821	25391	109770	127820	96206	121250	38991	47525	60782	77757	0.322693	0.486354	0.388193	TB-EOT	Non significant
Q6ZT62-2	Q6ZT62-2;Q6ZT62;Q9Y3L3-2;Q9Y3L3	>SP|Q6ZT62-2|BGIN_HUMAN Isoform Short BGIN of Bargin OS=Homo sapiens OX=9606 GN=BARGIN;>SP|Q6ZT62|BGIN_HUMAN Bargin OS=Homo sapiens OX=9606 GN=BARGIN PE=1 SV=2;>SP|Q9Y3L3-2|3BP1_HUMAN Isoform 2 of SH3 domain-binding protein 1 OS=Homo sapiens OX=9606 GN=SH3BP1	SH3BP1	2;2;2;2	4	2474.3	4471.7	14832	7019.1	8990.5	14637	3273.9	3704.3	5163.5	28606	0.0497622	0.142416	-0.623757	TB-EOT	Non significant
Q709C8-4	Q709C8-4;Q709C8-2;Q709C8-3;Q709C8	>SP|Q709C8-4|VP13C_HUMAN Isoform 4 of Vacuolar protein sorting-associated protein 13C OS=Homo sapiens OX=9606 GN=VPS13C;>SP|Q709C8-2|VP13C_HUMAN Isoform 2 of Vacuolar protein sorting-associated protein 13C OS=Homo sapiens OX=9606 GN=VPS13C;>SP|Q709C8-3|VP13C_	VPS13C	3;3;3;3	4	3623	3735.2	21674	14228	15843	29660	9633.3	12759	17091	34228	0.496612	0.633078	0.227398	TB-EOT	Non significant
Q71DI3	Q71DI3;Q16695;P68431;P84243;Q6NXT2	>SP|Q71DI3|H32_HUMAN Histone H3.2 OS=Homo sapiens OX=9606 GN=HIST2H3A PE=1 SV=3;>SP|Q16695|H31T_HUMAN Histone H3.1t OS=Homo sapiens OX=9606 GN=HIST3H3 PE=1 SV=3;>SP|P68431|H31_HUMAN Histone H3.1 OS=Homo sapiens OX=9606 GN=HIST1H3A PE=1 SV=2;>SP|P84243|H33_HUMA	HIST2H3A;HIST3H3;HIST1H3A;H3F3A;H3F3C	5;5;5;4;3	5	760150	493070	3522300	1170200	29441000	2588400	1552700	4965800	1846600	3049400	0.101052	0.226766	1.33686	TB-EOT	Non significant
Q7L1Q6-2	Q7L1Q6-2;Q7L1Q6;Q7L1Q6-4;Q7L1Q6-3;Q9Y6E2	>SP|Q7L1Q6-2|BZW1_HUMAN Isoform 2 of Basic leucine zipper and W2 domain-containing protein 1 OS=Homo sapiens OX=9606 GN=BZW1;>SP|Q7L1Q6|BZW1_HUMAN Basic leucine zipper and W2 domain-containing protein 1 OS=Homo sapiens OX=9606 GN=BZW1 PE=1 SV=1;>SP|Q7L1Q6-4|B	BZW1	5;5;5;5;1	5	38784	75278	380710	141110	175330	427330	34775	98647	176240	602950	0.0238881	0.0901585	-0.825176	TB-EOT	Non significant
Q7L2H7-2	Q7L2H7-2;Q7L2H7	>SP|Q7L2H7-2|EIF3M_HUMAN Isoform 2 of Eukaryotic translation initiation factor 3 subunit M OS=Homo sapiens OX=9606 GN=EIF3M;>SP|Q7L2H7|EIF3M_HUMAN Eukaryotic translation initiation factor 3 subunit M OS=Homo sapiens OX=9606 GN=EIF3M PE=1 SV=1	EIF3M	3;3	2	5318.8	5048.8	31480	11824	13244	31402	6503.8	8170.8	15510	48430	0.195461	0.347937	-0.3819	TB-EOT	Non significant
Q7L576	Q7L576;Q7L576-2;Q7L576-3	>SP|Q7L576|CYFP1_HUMAN Cytoplasmic FMR1-interacting protein 1 OS=Homo sapiens OX=9606 GN=CYFIP1 PE=1 SV=1;>SP|Q7L576-2|CYFP1_HUMAN Isoform 2 of Cytoplasmic FMR1-interacting protein 1 OS=Homo sapiens OX=9606 GN=CYFIP1;>SP|Q7L576-3|CYFP1_HUMAN Isoform 3 of Cyto	CYFIP1	8;7;5	3	49548	252670	701320	198300	242510	691550	100260	147020	151420	755150	0.00130743	0.0148418	-1.20431	TB-EOT	Downregulated
Q7L5N1	Q7L5N1	>SP|Q7L5N1|CSN6_HUMAN COP9 signalosome complex subunit 6 OS=Homo sapiens OX=9606 GN=COPS6 PE=1 SV=1	COPS6	2	1	5951.8	8209.8	41325	31502	27007	50570	10121	19960	22033	52184	0.961614	0.978992	-0.0146838	TB-EOT	Non significant
Q7LBR1	Q7LBR1	>SP|Q7LBR1|CHM1B_HUMAN Charged multivesicular body protein 1b OS=Homo sapiens OX=9606 GN=CHMP1B PE=1 SV=1	CHMP1B	2	1	10063	20261	38171	74372	17586	79945	15408	18841	23721	87653	0.437676	0.582419	-0.329491	TB-EOT	Non significant
Q7LG56	Q7LG56;Q7LG56-6;Q7LG56-2;Q7LG56-5;Q7LG56-3;P31350;P31350-2	>SP|Q7LG56|RIR2B_HUMAN Ribonucleoside-diphosphate reductase subunit M2 B OS=Homo sapiens OX=9606 GN=RRM2B PE=1 SV=1;>SP|Q7LG56-6|RIR2B_HUMAN Isoform 6 of Ribonucleoside-diphosphate reductase subunit M2 B OS=Homo sapiens OX=9606 GN=RRM2B;>SP|Q7LG56-2|RIR2B_HUM	RRM2B	6;5;4;2;2;1;1	7	23067	130610	339830	247930	156320	865320	32926	175780	75109	886210	0.0120879	0.0580352	-1.47265	TB-EOT	Non significant
Q7Z404-1	Q7Z404-1;Q7Z404;Q7Z404-3	>SP|Q7Z404-1|TMC4_HUMAN Isoform 2 of Transmembrane channel-like protein 4 OS=Homo sapiens OX=9606 GN=TMC4;>SP|Q7Z404|TMC4_HUMAN Transmembrane channel-like protein 4 OS=Homo sapiens OX=9606 GN=TMC4 PE=2 SV=3	TMC4	9;8;1	3	132350	76835	380440	219540	476390	657940	131330	118830	354080	435030	0.395182	0.544449	0.303562	TB-EOT	Non significant
Q7Z4H3-3	Q7Z4H3-3;Q7Z4H3-2;Q7Z4H3	>SP|Q7Z4H3-3|HDDC2_HUMAN Isoform 3 of HD domain-containing protein 2 OS=Homo sapiens OX=9606 GN=HDDC2;>SP|Q7Z4H3-2|HDDC2_HUMAN Isoform 2 of HD domain-containing protein 2 OS=Homo sapiens OX=9606 GN=HDDC2;>SP|Q7Z4H3|HDDC2_HUMAN HD domain-containing protein 2 O	HDDC2	2;2;2	3	2280.3	17853	28091	22074	17616	56745	8598.6	13462	14656	54908	0.0531182	0.14934	-0.866418	TB-EOT	Non significant
Q7Z6I6-3	Q7Z6I6-3;Q7Z6I6	>SP|Q7Z6I6-3|RHG30_HUMAN Isoform 3 of Rho GTPase-activating protein 30 OS=Homo sapiens OX=9606 GN=ARHGAP30;>SP|Q7Z6I6|RHG30_HUMAN Rho GTPase-activating protein 30 OS=Homo sapiens OX=9606 GN=ARHGAP30 PE=1 SV=3	ARHGAP30	4;4	2	91319	25895	53025	33391	25894	90676	12491	17569	47947	124260	0.76662	0.845561	-0.175101	TB-EOT	Non significant
Q7Z6Z7-2	Q7Z6Z7-2;Q7Z6Z7-3;Q7Z6Z7	>SP|Q7Z6Z7-2|HUWE1_HUMAN Isoform 2 of E3 ubiquitin-protein ligase HUWE1 OS=Homo sapiens OX=9606 GN=HUWE1;>SP|Q7Z6Z7-3|HUWE1_HUMAN Isoform 3 of E3 ubiquitin-protein ligase HUWE1 OS=Homo sapiens OX=9606 GN=HUWE1;>SP|Q7Z6Z7|HUWE1_HUMAN E3 ubiquitin-protein ligas	HUWE1	7;7;7	3	47670	17369	60132	44809	29769	49696	23917	29622	91764	57875	0.0613542	0.166635	0.801886	TB-EOT	Non significant
Q7Z7M9	Q7Z7M9	>SP|Q7Z7M9|GALT5_HUMAN Polypeptide N-acetylgalactosaminyltransferase 5 OS=Homo sapiens OX=9606 GN=GALNT5 PE=1 SV=1	GALNT5	8	1	60452	182240	154150	459850	223130	339990	28811	60652	281260	228730	0.982324	0.988693	0.0130403	TB-EOT	Non significant
Q86TI2-4	Q86TI2-4;Q86TI2;Q86TI2-2	>SP|Q86TI2-4|DPP9_HUMAN Isoform 3 of Dipeptidyl peptidase 9 OS=Homo sapiens OX=9606 GN=DPP9;>SP|Q86TI2|DPP9_HUMAN Dipeptidyl peptidase 9 OS=Homo sapiens OX=9606 GN=DPP9 PE=1 SV=3;>SP|Q86TI2-2|DPP9_HUMAN Isoform 2 of Dipeptidyl peptidase 9 OS=Homo sapiens OX=9	DPP9	3;3;3	3	7269.5	30278	151500	48060	61840	125150	21315	27782	37031	220760	0.0101672	0.0531224	-1.06869	TB-EOT	Non significant
Q86TX2	Q86TX2;P49753;P49753-2	>SP|Q86TX2|ACOT1_HUMAN Acyl-coenzyme A thioesterase 1 OS=Homo sapiens OX=9606 GN=ACOT1 PE=1 SV=1;>SP|P49753|ACOT2_HUMAN Acyl-coenzyme A thioesterase 2, mitochondrial OS=Homo sapiens OX=9606 GN=ACOT2 PE=1 SV=6;>SP|P49753-2|ACOT2_HUMAN Isoform 2 of Acyl-coenzym	ACOT1;ACOT2	5;5;3	3	13637	75165	466430	117390	68992	443550	51700	49618	43573	724170	0.000553464	0.00954123	-1.90311	TB-EOT	Downregulated
Q86UE4	Q86UE4	>SP|Q86UE4|LYRIC_HUMAN Protein LYRIC OS=Homo sapiens OX=9606 GN=MTDH PE=1 SV=2	MTDH	3	1	46375	25074	72943	32494	22889	108210	5532.8	12457	36179	148700	0.0981579	0.222501	-0.952357	TB-EOT	Non significant
Q86UP2-2	Q86UP2-2;Q86UP2-4;Q86UP2;Q86UP2-3	>SP|Q86UP2-2|KTN1_HUMAN Isoform 2 of Kinectin OS=Homo sapiens OX=9606 GN=KTN1;>SP|Q86UP2-4|KTN1_HUMAN Isoform 4 of Kinectin OS=Homo sapiens OX=9606 GN=KTN1;>SP|Q86UP2|KTN1_HUMAN Kinectin OS=Homo sapiens OX=9606 GN=KTN1 PE=1 SV=1;>SP|Q86UP2-3|KTN1_HUMAN Isoform	KTN1	3;3;3;2	4	58261	15574	57329	33535	52229	69701	38862	45714	173180	56406	0.0139378	0.0644361	1.2332	TB-EOT	Non significant
Q86UQ4	Q86UQ4;Q86UQ4-4;Q86UQ4-6;Q86UQ4-7;Q86UQ4-5;Q86UQ4-3	>SP|Q86UQ4|ABCAD_HUMAN ATP-binding cassette sub-family A member 13 OS=Homo sapiens OX=9606 GN=ABCA13 PE=2 SV=3;>SP|Q86UQ4-4|ABCAD_HUMAN Isoform 4 of ATP-binding cassette sub-family A member 13 OS=Homo sapiens OX=9606 GN=ABCA13	ABCA13	5;5;1;1;1;1	6	22928	6589.4	40292	29869	62963	24384	22909	23375	123910	30482	0.000775379	0.0111569	1.69542	TB-EOT	Upregulated
Q86UX7-2	Q86UX7-2;Q86UX7	>SP|Q86UX7-2|URP2_HUMAN Isoform 2 of Fermitin family homolog 3 OS=Homo sapiens OX=9606 GN=FERMT3;>SP|Q86UX7|URP2_HUMAN Fermitin family homolog 3 OS=Homo sapiens OX=9606 GN=FERMT3 PE=1 SV=1	FERMT3	13;13	2	69540	308890	1016000	297890	448910	1036100	185120	241860	170170	1932600	0.00409414	0.0293735	-1.27257	TB-EOT	Downregulated
Q86VB7-3	Q86VB7-3;Q86VB7;Q86VB7-2;Q86VB7-4	>SP|Q86VB7-3|C163A_HUMAN Isoform 3 of Scavenger receptor cysteine-rich type 1 protein M130 OS=Homo sapiens OX=9606 GN=CD163;>SP|Q86VB7|C163A_HUMAN Scavenger receptor cysteine-rich type 1 protein M130 OS=Homo sapiens OX=9606 GN=CD163 PE=1 SV=2;>SP|Q86VB7-2|C16	CD163	27;27;27;26	4	3225800	3503500	3944800	6089300	3625500	7452600	756720	2215900	1757200	7046900	0.659032	0.762852	-0.233005	TB-EOT	Non significant
Q86VM9-2	Q86VM9-2;Q86VM9	>SP|Q86VM9-2|ZCH18_HUMAN Isoform 2 of Zinc finger CCCH domain-containing protein 18 OS=Homo sapiens OX=9606 GN=ZC3H18;>SP|Q86VM9|ZCH18_HUMAN Zinc finger CCCH domain-containing protein 18 OS=Homo sapiens OX=9606 GN=ZC3H18 PE=1 SV=2	ZC3H18	2;2	2	43213	11170	32150	29421	22810	49729	15129	15112	24757	51529	0.327013	0.487634	0.452837	TB-EOT	Non significant
Q86VP6	Q86VP6;Q86VP6-2;Q86VP6-3;O75155-2;O75155	>SP|Q86VP6|CAND1_HUMAN Cullin-associated NEDD8-dissociated protein 1 OS=Homo sapiens OX=9606 GN=CAND1 PE=1 SV=2;>SP|Q86VP6-2|CAND1_HUMAN Isoform 2 of Cullin-associated NEDD8-dissociated protein 1 OS=Homo sapiens OX=9606 GN=CAND1	CAND1	20;19;6;1;1	5	132350	592420	2771400	1628600	1123500	2668100	451980	943280	743840	2605400	0.151565	0.296693	-0.637941	TB-EOT	Non significant
Q86X29-6	Q86X29-6;Q86X29-5;Q86X29-4;Q86X29;Q86X29-2;Q86X29-3	>SP|Q86X29-6|LSR_HUMAN Isoform 6 of Lipolysis-stimulated lipoprotein receptor OS=Homo sapiens OX=9606 GN=LSR;>SP|Q86X29-5|LSR_HUMAN Isoform 5 of Lipolysis-stimulated lipoprotein receptor OS=Homo sapiens OX=9606 GN=LSR;>SP|Q86X29-4|LSR_HUMAN Isoform 4 of Lipol	LSR	4;4;4;4;3;3	6	304180	34347	200790	217890	190700	275100	50220	47542	998310	141120	0.076752	0.192322	1.32096	TB-EOT	Non significant
Q86X76-5	Q86X76-5;Q86X76-2;Q86X76-4;Q86X76;Q86X76-3	>SP|Q86X76-5|NIT1_HUMAN Isoform 6 of Deaminated glutathione amidase OS=Homo sapiens OX=9606 GN=NIT1;>SP|Q86X76-2|NIT1_HUMAN Isoform 1 of Deaminated glutathione amidase OS=Homo sapiens OX=9606 GN=NIT1;>SP|Q86X76-4|NIT1_HUMAN Isoform 5 of Deaminated glutathione	NIT1	4;4;4;4;4	5	75085	133060	482300	305330	218630	450530	200870	213800	245820	645720	0.806124	0.875796	-0.0745247	TB-EOT	Non significant
Q86YS7	Q86YS7;Q86YS7-2;Q86YS7-3;Q86YS7-4;Q86YS7-5	>SP|Q86YS7|C2CD5_HUMAN C2 domain-containing protein 5 OS=Homo sapiens OX=9606 GN=C2CD5 PE=1 SV=1;>SP|Q86YS7-2|C2CD5_HUMAN Isoform 2 of C2 domain-containing protein 5 OS=Homo sapiens OX=9606 GN=C2CD5;>SP|Q86YS7-3|C2CD5_HUMAN Isoform 3 of C2 domain-containing p	C2CD5	2;2;2;2;1	5	6279.1	5383.4	26735	8802	11529	26508	5724.8	4981.1	10573	40381	0.105342	0.233564	-0.525673	TB-EOT	Non significant
Q86YT9-3	Q86YT9-3;Q86YT9-4;Q86YT9-2;Q86YT9	>SP|Q86YT9-3|JAML_HUMAN Isoform 3 of Junctional adhesion molecule-like OS=Homo sapiens OX=9606 GN=JAML;>SP|Q86YT9-4|JAML_HUMAN Isoform 4 of Junctional adhesion molecule-like OS=Homo sapiens OX=9606 GN=JAML;>SP|Q86YT9-2|JAML_HUMAN Isoform 2 of Junctional adhes	AMICA1	3;3;3;3	4	48914	94502	182660	206640	312640	220970	53777	90857	77836	174490	0.611169	0.729089	0.2179	TB-EOT	Non significant
Q8IU85-2	Q8IU85-2;Q8IU85;Q14012	>SP|Q8IU85-2|KCC1D_HUMAN Isoform 2 of Calcium/calmodulin-dependent protein kinase type 1D OS=Homo sapiens OX=9606 GN=CAMK1D;>SP|Q8IU85|KCC1D_HUMAN Calcium/calmodulin-dependent protein kinase type 1D OS=Homo sapiens OX=9606 GN=CAMK1D PE=1 SV=1;>SP|Q14012|KCC1A	CAMK1D;CAMK1	3;3;2	3	13439	29597	155420	50243	41342	145050	27626	35225	47903	169230	0.0129623	0.0608507	-0.784106	TB-EOT	Non significant
Q8IUI8-2	Q8IUI8-2;Q8IUI8	>SP|Q8IUI8-2|CRLF3_HUMAN Isoform 2 of Cytokine receptor-like factor 3 OS=Homo sapiens OX=9606 GN=CRLF3;>SP|Q8IUI8|CRLF3_HUMAN Cytokine receptor-like factor 3 OS=Homo sapiens OX=9606 GN=CRLF3 PE=1 SV=2	CRLF3	2;2	2	9362.7	6543.7	14721	14020	25504	25989	4880.8	6764.9	16741	62756	0.976919	0.986026	0.0119061	TB-EOT	Non significant
Q8IV08	Q8IV08	>SP|Q8IV08|PLD3_HUMAN Phospholipase D3 OS=Homo sapiens OX=9606 GN=PLD3 PE=1 SV=1	PLD3	7	1	327130	625250	1122900	710580	532710	1942400	295310	560610	346860	4466500	0.0264146	0.0958868	-0.98363	TB-EOT	Non significant
Q8IWA5	Q8IWA5;Q8IWA5-2;Q8IWA5-3	>SP|Q8IWA5|CTL2_HUMAN Choline transporter-like protein 2 OS=Homo sapiens OX=9606 GN=SLC44A2 PE=1 SV=3;>SP|Q8IWA5-2|CTL2_HUMAN Isoform 2 of Choline transporter-like protein 2 OS=Homo sapiens OX=9606 GN=SLC44A2;>SP|Q8IWA5-3|CTL2_HUMAN Isoform 3 of Choline trans	SLC44A2	6;6;6	3	99331	142140	230920	371480	206750	781620	86214	164600	191400	600920	0.53538	0.664624	-0.230901	TB-EOT	Non significant
Q8IWL2	Q8IWL2;Q8IWL1;Q8IWL2-2	>SP|Q8IWL2|SFTA1_HUMAN Pulmonary surfactant-associated protein A1 OS=Homo sapiens OX=9606 GN=SFTPA1 PE=1 SV=2;>SP|Q8IWL1|SFPA2_HUMAN Pulmonary surfactant-associated protein A2 OS=Homo sapiens OX=9606 GN=SFTPA2 PE=1 SV=1;>SP|Q8IWL2-2|SFTA1_HUMAN Isoform 2 of P	SFTPA1;SFTPA2	7;7;7	3	1321900	102050	342460	1976400	270520	959290	36658	169370	323190	374490	0.364051	0.521886	0.859293	TB-EOT	Non significant
Q8IYB7	Q8IYB7;Q8IYB7-3;Q8IYB7-2;Q8IYB7-4	>SP|Q8IYB7|DI3L2_HUMAN DIS3-like exonuclease 2 OS=Homo sapiens OX=9606 GN=DIS3L2 PE=1 SV=4;>SP|Q8IYB7-3|DI3L2_HUMAN Isoform 3 of DIS3-like exonuclease 2 OS=Homo sapiens OX=9606 GN=DIS3L2;>SP|Q8IYB7-2|DI3L2_HUMAN Isoform 2 of DIS3-like exonuclease 2 OS=Homo sa	DIS3L2	3;2;2;1	4	22170	13734	36168	45608	47174	47786	26437	33453	44245	47165	0.00236297	0.0211387	0.96667	TB-EOT	Non significant
[truncated: 318 more rows]
